# Supplementary material for: Mutations in RAB39B in individuals with intellectual disability, autism spectrum disorder, and macrocephaly
Source: Mol Autism. 2017 Nov 9;8:59. doi: 10.1186/s13229-017-0175-3 (PMC5679329; doi:10.1186/s13229-017-0175-3)
Supplement: Supplementary file 1 — human_GO_15_800_PATH_10_500.gmt (filtered gene-set definitions) (GMT 4425 kb) [file 13229_2017_175_MOESM1_ESM.gmt]

GO:0000002	GO:MITOCHONDRIAL GENOME MAINTENANCE	142	291	1763	1890	3980	4205	4358	4976	5428	7084	7157	9093	9361	10000	10891	11232	30968	50484	55022	55186	56652	63875	80119	83667	84275	92667	131474	201973	219736
GO:0000018	GO:REGULATION OF DNA RECOMBINATION	604	641	940	958	1111	2956	3458	3558	3565	3575	3586	3836	3838	3980	4292	4361	4436	4437	5531	5888	6118	6778	6830	7014	7040	7292	7320	7374	7468	8741	9466	9984	10111	10189	10635	10721	22976	23028	23514	23529	30009	50943	51010	51548	51750	54386	55010	55137	56154	56852	56916	56979	63979	80762	84083	84893	151987	200558	401720
GO:0000027	GO:RIBOSOMAL LARGE SUBUNIT ASSEMBLY	6122	6123	6125	6128	6134	6135	6136	6147	6152	6169	22868	22907	23195	51187	55052	55299	55794	56342	65003	80135	84154	140801
GO:0000028	GO:RIBOSOMAL SMALL SUBUNIT ASSEMBLY	3921	5822	6169	6193	6204	6208	6218	6223	6232	26284	27341	29777	51065	51081	64963	91695	93144
GO:0000038	GO:VERY LONG-CHAIN FATTY ACID METABOLIC PROCESS	30	37	51	215	225	3295	5825	5828	6785	8529	9200	9524	10965	10998	10999	11001	23205	28965	51495	54898	60481	64834	66002	79993	83401	122970	201562	401494	641371
GO:0000041	GO:TRANSITION METAL ION TRANSPORT	475	523	525	526	527	528	529	533	534	535	537	538	540	567	1213	1317	1318	1356	1785	2288	2495	2512	2694	3077	3658	4241	4504	4891	5286	5818	6341	6556	6947	6948	7018	7036	7037	7220	7222	7223	7224	7225	7226	7779	7780	7781	7782	7784	7922	8301	8724	8992	9114	9230	9296	9550	9843	9914	9973	9997	10063	10312	10463	22853	23516	23545	25800	27032	27173	29985	29986	30061	50617	51076	51312	51382	51606	53940	55240	55334	55532	55630	55676	57113	57181	57192	57348	57817	64116	64924	79689	90423	91252	94033	127124	148867	155066	169026	201266	221074	245972	245973	261729	283375	286133	341208	387849	389844
GO:0000042	GO:PROTEIN TARGETING TO GOLGI	2800	2803	5870	6653	9321	9648	10133	55690	79571	83452	84220	90196	285190	400966	653489	727851	729540	729857
GO:0000045	GO:AUTOPHAGOSOME ASSEMBLY	5289	5305	5663	5861	5899	6048	7879	8100	8396	8678	8897	9140	9363	9474	9637	9638	9776	9821	11152	11345	22863	22878	22930	23130	23192	23241	23256	23673	23710	23766	25782	26100	29082	29978	29979	51100	51715	55054	55062	55102	55626	55647	56270	57533	57535	58476	60673	64422	65018	79065	79142	79837	81631	81876	83452	83460	84557	84938	84971	89849	90410	90678	94241	115201	120892	128866	200576	285973	440738	441925	643246
GO:0000060	GO:PROTEIN IMPORT INTO NUCLEUS, TRANSLOCATION	207	406	602	604	672	983	1026	2621	2646	3172	3326	3458	3479	3569	3717	3837	3842	3843	4504	4792	4968	4985	4991	5138	5469	5901	6496	6556	7040	7124	7157	7295	8644	9702	10204	10952	11331	23411	23649	26953	30000	51366	55696	57506	79711	84867	84875	116988	137735	340061
GO:0000070	GO:MITOTIC SISTER CHROMATID SEGREGATION	324	472	546	699	701	891	990	991	996	1062	1063	1457	1459	1843	3833	3834	3835	3837	4085	4342	4751	5119	5347	5518	5728	5925	7013	7175	7272	7273	7321	7324	7517	7756	8243	8379	8452	8658	8678	8697	8766	8881	9126	9183	9184	9232	9525	9555	9700	9702	9787	9918	9928	10051	10300	10393	10403	10459	10464	10592	10615	10744	10783	11004	11044	11065	11113	11130	23047	23126	23137	23212	23244	23310	23383	23397	25836	25906	25978	26255	26271	27183	27243	29082	29882	29945	51143	51203	51433	51434	51451	51510	51529	54617	54908	54984	55143	55719	55795	56155	56984	57132	64151	64682	79003	79075	79643	80218	81929	81930	83903	84101	84250	84722	84861	90417	91782	92421	113130	119504	128866	129563	146909	148479	246184	283489	285753	286053	348654
GO:0000075	GO:CELL CYCLE CHECKPOINT	207	324	332	472	545	595	598	641	672	699	701	835	890	891	901	983	988	990	991	996	1017	1026	1027	1030	1063	1111	1112	1263	1386	1407	1432	1457	1459	1739	1763	1843	1869	2189	2765	3014	3265	3364	4085	4193	4303	4361	4436	4582	4683	5347	5371	5527	5546	5591	5629	5682	5683	5684	5685	5686	5687	5688	5689	5690	5691	5692	5693	5694	5695	5696	5698	5699	5700	5701	5702	5704	5705	5706	5707	5708	5709	5710	5711	5713	5714	5715	5716	5717	5718	5719	5720	5721	5781	5810	5883	5884	5925	5932	6118	6152	6233	6419	6659	6664	7013	7040	7153	7155	7157	7158	7161	7175	7272	7311	7314	7316	7321	7324	7483	7508	7517	7756	7919	8091	8243	8295	8318	8379	8451	8525	8555	8563	8626	8682	8697	8738	8870	8881	8883	9134	9183	9184	9212	9261	9344	9491	9575	9577	9587	9656	9735	9861	9984	10116	10197	10213	10393	10397	10459	10769	10783	11065	11130	11200	23198	23476	25896	25906	25949	25988	26058	26270	27339	29086	29882	29935	29945	51065	51143	51322	51343	51347	51433	51434	51451	51499	51512	51514	51529	51720	51776	54888	54908	54962	55055	55159	55215	55367	55544	55743	55755	55795	56155	56984	57082	57551	57646	57805	60561	63967	64326	64682	64858	64859	65123	79035	79184	79621	79791	79858	80254	80279	81620	83695	83903	83990	84072	84101	84126	84142	84446	84861	90381	91603	119504	122706	126520	135458	143471	144715	246184	261726	346673	348654	377630
GO:0000077	GO:DNA DAMAGE CHECKPOINT	472	545	595	641	672	835	890	983	988	1017	1026	1027	1111	1112	1386	1407	1432	1869	2765	3014	3364	4193	4303	4361	4436	4582	4683	5347	5371	5527	5591	5682	5683	5684	5685	5686	5687	5688	5689	5690	5691	5692	5693	5694	5695	5696	5698	5699	5700	5701	5702	5704	5705	5706	5707	5708	5709	5710	5711	5713	5714	5715	5716	5717	5718	5719	5720	5721	5781	5810	5883	5884	5932	6118	6233	6659	7157	7158	7161	7311	7314	7316	7508	7919	8091	8451	8525	8555	8563	8626	8682	8738	8870	9261	9344	9491	9575	9577	9656	9861	9984	10116	10197	10213	10783	11200	23198	23476	25896	25949	25988	26058	26270	27339	29086	29935	51065	51322	51343	51347	51499	51512	51514	51720	51776	54962	55159	55215	55367	55544	57551	57646	57805	60561	63967	64326	79184	79621	79791	79858	80254	80279	83695	83990	84126	84142	84446	91603	122706	126520	135458	143471	144715	261726
GO:0000079	GO:REGULATION OF CYCLIN-DEPENDENT PROTEIN SERINE/THREONINE KINASE ACTIVITY	207	324	595	641	836	890	892	894	896	900	902	904	905	990	993	995	1022	1026	1027	1029	1030	1031	1032	1033	1050	1163	1164	1647	1956	2255	2810	2965	3087	3306	4221	4331	4745	5155	5292	5310	5311	5347	5629	5716	5728	6491	6714	6868	7023	7026	7128	8452	8812	8850	8851	8941	9077	9088	9113	9134	10614	11065	11140	22924	23560	25793	26524	27013	28984	29950	51191	51374	51654	56647	57018	79791	80279	81669	84417	84722	85417	92002	93649	124790	151195	153090	219771	245711	339521	388324	414194	494551
GO:0000082	GO:G1/S TRANSITION OF MITOTIC CELL CYCLE	90	91	199	207	301	328	472	571	586	595	596	637	815	816	817	818	835	891	898	902	983	990	993	997	1017	1018	1019	1021	1022	1026	1027	1029	1030	1031	1032	1033	1104	1163	1263	1387	1543	1654	1719	1869	1874	1876	1956	1977	1978	2146	2255	2273	2672	2765	2935	3275	3398	3400	3624	3688	3741	4171	4172	4173	4174	4175	4176	4193	4331	4582	4602	4863	4998	4999	5000	5001	5111	5292	5310	5311	5356	5371	5422	5426	5427	5471	5527	5530	5537	5557	5558	5591	5682	5683	5684	5685	5686	5687	5688	5689	5690	5691	5692	5693	5694	5695	5696	5698	5699	5700	5701	5702	5704	5705	5706	5707	5708	5709	5710	5711	5713	5714	5715	5716	5717	5718	5719	5720	5721	5728	5777	5925	5932	5962	6117	6118	6119	6198	6233	6241	6500	6502	6597	6659	6868	6929	7027	7157	7161	7298	7311	7314	7316	7325	7465	8065	8317	8318	8450	8451	8452	8453	8454	8462	8525	8558	8626	8738	8882	8900	9088	9113	9134	9200	9491	9861	9928	10106	10197	10213	10217	10630	10769	10926	11040	11319	23026	23133	23198	23236	23476	23594	23595	23649	25793	25959	25988	26057	26058	26271	26524	27085	27134	28227	28984	29117	29933	29935	51065	51270	51339	51379	51499	51512	54617	55022	55159	55367	55388	55544	56257	57695	58190	58480	59343	64326	79027	79577	79791	79960	81620	84515	84967	91607	113130	122706	126520	128239	131405	134353	138151	143384	143471	144455	151242	245711	340152	573971
GO:0000083	GO:REGULATION OF TRANSCRIPTION INVOLVED IN G1/S TRANSITION OF MITOTIC CELL CYCLE	571	898	983	990	1719	1869	1874	1876	2672	3398	4863	4998	5111	5422	5925	6241	7298	8318	8462	8882	8900	23476	25988	26271	81620	144455	573971
GO:0000086	GO:G2/M TRANSITION OF MITOTIC CELL CYCLE	332	351	472	571	595	641	817	890	891	902	983	993	994	995	1017	1019	1022	1026	1029	1030	1063	1069	1111	1112	1263	1453	1454	1639	1647	1778	1781	1785	2029	2033	2273	2305	3306	3320	3364	4218	4303	4331	4361	4605	4659	4660	4683	4751	4926	4957	5048	5087	5108	5116	5218	5243	5347	5500	5518	5520	5566	5569	5577	5588	5889	5890	5928	6233	6500	6502	6604	6790	6873	7013	7164	7277	7283	7311	7314	7316	7465	7480	7531	7532	7840	7846	8091	8317	8454	8481	8493	8636	8655	8766	8870	8883	8900	8929	8945	9024	9088	9113	9133	9200	9525	9662	9702	9738	9793	9814	9833	9928	10083	10121	10133	10142	10382	10383	10426	10540	10657	10733	10763	10776	10806	10844	11064	11116	11190	11200	11258	22897	22919	22981	22994	22995	23194	23236	23291	23332	23476	25942	25949	27133	27175	27229	29933	51347	54820	55031	55125	55142	55215	55722	55755	55835	55920	55957	57325	60561	60672	63967	79176	79621	79831	79866	79959	80169	80174	80184	80254	80279	80321	84131	84930	84962	85378	85417	90381	91603	91750	95681	114791	121441	132660	135458	203068	219736	219771	286826	102800317
GO:0000096	GO:SULFUR AMINO ACID METABOLIC PROCESS	189	191	635	773	875	1036	1312	1373	1468	1491	1800	2678	2729	2730	2805	4143	4357	4482	4507	4522	4524	4548	4552	4594	6611	6821	7263	9054	10768	23382	23474	23743	27232	50507	51074	51380	51449	55256	55748	58472	58478	78991	84245	441024	102724560
GO:0000097	GO:SULFUR AMINO ACID BIOSYNTHETIC PROCESS	191	635	875	1036	1491	2678	2805	4507	4522	4524	4548	4552	23743	51074	55256	58478	84245	441024	102724560
GO:0000122	GO:NEGATIVE REGULATION OF TRANSCRIPTION FROM RNA POLYMERASE II PROMOTER	93	142	165	166	190	196	356	429	430	463	467	473	546	571	579	595	604	639	648	650	652	654	668	688	708	811	857	863	864	948	1028	1045	1046	1050	1108	1263	1386	1387	1407	1408	1428	1482	1487	1488	1499	1523	1602	1616	1649	1655	1739	1745	1746	1748	1761	1786	1788	1789	1810	1814	1822	1831	1869	1876	1877	1906	1910	1942	1958	1990	1991	2005	2019	2022	2023	2033	2056	2063	2077	2100	2101	2114	2117	2120	2146	2186	2254	2260	2261	2263	2274	2302	2303	2304	2305	2308	2309	2354	2444	2551	2623	2624	2625	2627	2649	2672	2736	2737	2874	2909	3006	3007	3008	3009	3046	3050	3054	3059	3065	3066	3068	3087	3090	3091	3096	3146	3166	3170	3181	3182	3190	3199	3204	3213	3214	3224	3234	3235	3280	3281	3297	3299	3394	3397	3398	3399	3400	3428	3429	3458	3476	3516	3553	3642	3651	3660	3661	3665	3670	3720	3725	3726	3727	3952	4004	4084	4087	4088	4089	4092	4094	4100	4101	4152	4188	4193	4194	4204	4205	4208	4212	4221	4261	4286	4335	4487	4488	4591	4601	4602	4609	4666	4690	4734	4773	4774	4776	4781	4782	4783	4784	4790	4791	4799	4825	4838	4848	4851	4853	4854	4861	4904	4929	4999	5017	5071	5074	5077	5078	5079	5080	5138	5178	5187	5245	5308	5347	5396	5449	5457	5458	5460	5465	5467	5468	5469	5481	5494	5569	5607	5626	5629	5663	5716	5727	5741	5814	5828	5914	5915	5916	5925	5927	5931	5932	5933	5966	5970	5971	5978	5987	5993	6045	6208	6233	6239	6256	6271	6297	6299	6304	6310	6421	6469	6474	6493	6495	6497	6498	6591	6595	6597	6601	6608	6615	6622	6657	6658	6664	6665	6670	6672	6688	6720	6721	6722	6736	6772	6774	6778	6827	6829	6839	6862	6879	6886	6907	6909	6911	6913	6926	6928	6929	6932	6934	6935	6936	6943	6944	6945	6996	7009	7020	7021	7022	7025	7026	7040	7050	7067	7068	7071	7080	7088	7091	7101	7124	7157	7161	7175	7181	7189	7227	7291	7295	7311	7314	7316	7321	7323	7329	7356	7376	7421	7422	7428	7430	7436	7466	7468	7469	7480	7490	7494	7514	7528	7538	7541	7554	7593	7695	7703	7704	7707	7712	7727	7730	7743	7753	7755	7764	7804	7832	7936	8013	8091	8092	8204	8239	8289	8312	8320	8325	8328	8403	8405	8409	8431	8440	8452	8462	8531	8535	8538	8545	8553	8554	8626	8725	8726	8819	8841	8863	8864	8914	8928	8932	9025	9093	9096	9099	9212	9219	9241	9242	9314	9318	9338	9400	9421	9534	9555	9572	9603	9611	9612	9646	9678	9705	9730	9734	9745	9759	9839	9869	9969	9971	10002	10014	10062	10155	10174	10215	10229	10320	10363	10370	10443	10459	10467	10468	10472	10499	10507	10524	10589	10608	10614	10628	10637	10664	10771	10780	10795	10848	10915	10919	11006	11016	11023	11060	11107	11142	11171	11218	11244	11278	22823	22849	22882	22890	22933	22938	22943	22980	23013	23019	23028	23038	23051	23152	23168	23186	23286	23309	23314	23316	23327	23405	23411	23414	23429	23462	23466	23492	23493	23512	23528	23613	23645	23650	23741	25803	25806	25822	25836	25850	25855	25920	25937	25942	25959	25988	26036	26137	26155	26287	26508	27022	27033	27063	28996	29114	29128	29842	29915	29966	29995	30818	50674	50943	50945	51042	51085	51132	51176	51222	51317	51339	51341	51513	51523	51547	51564	51588	51592	51616	51684	53335	53615	53820	54345	54567	54623	54815	54816	54862	54880	54927	55079	55122	55170	55192	55250	55252	55364	55502	55506	55509	55553	55609	55662	55689	55729	55837	55841	55869	55929	56180	56252	56257	56676	56940	56950	56957	56998	57057	57167	57332	57451	57459	57491	57594	57600	57649	57659	57673	57680	57761	57817	59336	59348	60436	60468	63976	63978	64207	64321	64324	64412	64426	64750	65251	78986	79365	79576	79577	79595	79718	79723	79733	79813	79898	80014	80314	80317	80712	81857	83482	83855	83860	83933	84108	84159	84174	84231	84312	84458	84504	84524	84525	84619	84662	84667	84678	84733	84838	84864	84911	84934	84944	84962	85508	85509	90523	91464	92129	92140	93649	93986	96459	116039	117581	121536	122953	124790	125997	127343	128209	129025	130497	134701	138151	140290	140883	144455	145258	146198	148398	148738	148979	152518	153090	153222	155061	161882	162979	163050	163081	164656	165918	167465	167826	169792	170302	170959	171023	171392	200014	201163	221336	221895	222894	225689	255877	266740	283078	283571	284428	333929	339344	341405	342371	346171	387893	388585	389493	389549	390598	390992	391104	391723	441478	652991	653656	653657	100125288	100128927	100529215
GO:0000132	GO:ESTABLISHMENT OF MITOTIC SPINDLE ORIENTATION	1058	2138	2255	3064	4926	5048	5080	6993	9181	9183	10252	10253	10403	23160	29899	54820	54908	55755	81565	124997	387755
GO:0000154	GO:RRNA MODIFICATION	1736	2091	10436	10528	27292	29960	51093	51106	51504	51602	55651	63899	64216	79066	79922	91893	117246	154743	196074	345630	387338	100130758
GO:0000183	GO:CHROMATIN SILENCING AT RDNA	3020	3021	5253	6839	6908	7343	8294	8350	8351	8352	8353	8354	8355	8356	8357	8358	8359	8360	8361	8362	8363	8364	8365	8366	8367	8368	8370	8968	9013	9014	9015	11176	22933	23133	23378	23411	57673	79101	121504	126961	333932	554313	653604
GO:0000184	GO:NUCLEAR-TRANSCRIBED MRNA CATABOLIC PROCESS, NONSENSE-MEDIATED DECAY	1981	2107	2197	2935	3646	3921	4116	4686	4736	5073	5394	5515	5518	5520	5976	6122	6123	6124	6125	6128	6129	6130	6132	6133	6134	6135	6136	6137	6138	6139	6141	6142	6143	6144	6146	6147	6152	6154	6155	6156	6157	6158	6159	6160	6161	6164	6165	6167	6168	6169	6170	6171	6173	6175	6176	6181	6187	6188	6189	6191	6192	6193	6194	6201	6202	6203	6204	6205	6206	6207	6208	6209	6210	6217	6218	6222	6223	6224	6227	6228	6229	6230	6231	6232	6233	6234	6235	7311	9045	9349	9704	9775	9811	9887	9939	10921	11224	22794	22916	23049	23293	23381	23521	23708	25873	26019	26986	51121	51594	55110	55181	55629	55802	56006	65109	65110	79048	84305	127933	167227	196513
GO:0000186	GO:ACTIVATION OF MAPKK ACTIVITY	88	134	284	369	652	673	685	801	805	808	815	816	817	818	1326	1398	1399	1437	1438	1439	1742	1839	1847	1848	1849	1852	1950	1956	2064	2065	2066	2069	2074	2149	2246	2247	2248	2249	2250	2251	2252	2253	2254	2255	2260	2261	2263	2264	2321	2534	2771	2885	2889	2902	2903	2904	2905	2906	2911	3084	3265	3558	3559	3560	3561	3562	3563	3567	3568	3667	3716	3717	3718	3815	3845	4140	4214	4215	4216	4217	4254	4293	4294	4296	4342	4616	4684	4747	4763	4803	4893	4914	5037	5154	5155	5156	5159	5335	5536	5594	5595	5604	5605	5610	5663	5682	5683	5684	5685	5686	5687	5688	5689	5690	5691	5692	5693	5694	5695	5696	5698	5699	5700	5701	5702	5704	5705	5706	5707	5708	5709	5710	5711	5713	5714	5715	5716	5717	5718	5719	5720	5721	5747	5786	5894	5906	5921	5922	5923	5924	6233	6464	6654	6708	6709	6710	6711	6712	6885	7010	7046	7311	7314	7316	7529	7786	8074	8315	8437	8452	8649	8660	8682	8754	8817	8822	8823	8831	8844	9020	9064	9175	9344	9365	9462	9491	9542	9607	9693	9861	9965	9978	10125	10142	10156	10197	10213	10746	10817	10818	10912	22821	23005	23043	23198	25759	25780	26281	27006	27040	28956	51332	51347	51776	53358	54756	55437	56911	57498	57551	57731	64926	84078	84292	84451	84634	115727	120892	122706	143471	145957	152559	152831	153090	161742	203447	221002	389840
GO:0000187	GO:ACTIVATION OF MAPK ACTIVITY	101	136	150	151	152	238	408	650	727	728	972	975	983	1139	1432	1464	1616	1815	1847	1848	1849	1852	1902	1942	2074	2081	2205	2247	2255	2357	2549	2690	2785	2911	2914	3082	3553	3643	3654	3656	3672	3815	4188	4214	4217	4233	4293	4294	4296	4342	4908	4916	5027	5063	5148	5149	5291	5319	5562	5585	5594	5595	5600	5602	5604	5605	5606	5607	5608	5609	5770	5781	5829	5871	6233	6288	6363	6464	6647	6850	6885	6997	7039	7043	7057	7099	7124	7161	7189	7311	7314	7316	7474	7852	7867	8312	8517	8550	8567	8600	8682	8737	8767	9043	9064	9170	9261	9294	10392	10454	10746	10818	10961	11183	11184	23118	23162	23566	25759	28988	29969	51196	51495	51738	51776	60370	60675	64127	79444	79594	84432	84451	114898	120892	128239	153090	200958	255324	257397
GO:0000188	GO:INACTIVATION OF MAPK ACTIVITY	857	1843	1844	1845	1846	1847	1848	1849	1850	1852	2873	2874	5515	5518	5578	5998	5999	11072	11221	51562	54900	56940	63904	80824	142679	150290	161742	200734
GO:0000209	GO:PROTEIN POLYUBIQUITINATION	267	329	331	580	596	642	672	865	996	997	1029	1161	1643	3093	4012	4734	5071	5682	5683	5684	5685	5686	5687	5688	5689	5690	5691	5692	5693	5694	5695	5696	5698	5699	5700	5701	5702	5704	5705	5706	5707	5708	5709	5710	5711	5713	5714	5715	5716	5717	5718	5719	5720	5721	5987	6047	6048	6049	6233	6502	6596	6737	7128	7174	7186	7189	7267	7311	7314	7316	7319	7320	7321	7322	7323	7324	7325	7326	7327	7328	7332	7334	7335	7336	7337	8312	8452	8658	8697	8881	8945	9025	9111	9320	9354	9491	9520	9604	9666	9690	9781	9810	9861	10013	10075	10193	10197	10210	10213	10273	10299	10393	10425	10475	10477	10616	11060	11065	11236	11237	22888	22954	23198	23291	23295	23327	23328	23608	23623	23759	25820	25831	25847	25897	26001	26191	26249	26263	26272	27246	27252	27338	27339	29089	29882	29945	51255	51283	51343	51366	51433	51434	51444	51514	51529	51619	51676	54467	54476	54542	54551	54708	54778	54926	54941	55016	55072	55284	55611	55632	55658	55743	55905	56254	57154	57162	57531	57542	57817	63893	64682	79845	80196	80351	80829	81844	81847	81858	83737	84447	84875	84937	85363	90678	92305	92912	115992	117584	117854	118424	122706	127544	140739	143471	147339	148203	148581	149603	151112	153830	154214	165918	220441	220972	246184	255488	257218	285671	378884	389898	494470
GO:0000226	GO:MICROTUBULE CYTOSKELETON ORGANIZATION	25	324	332	387	402	583	585	636	667	672	675	827	857	859	891	899	983	998	1017	1027	1058	1062	1069	1070	1104	1107	1108	1111	1263	1267	1400	1410	1453	1499	1540	1605	1647	1739	1767	1778	1783	1855	1894	1946	2009	2042	2138	2241	2242	2255	2258	2288	2316	2597	2801	3064	3796	3832	3833	3837	3925	3993	3996	4000	4130	4131	4133	4134	4135	4137	4281	4287	4292	4342	4591	4605	4627	4659	4682	4744	4747	4751	4869	4926	5048	5080	5108	5116	5119	5195	5310	5311	5314	5347	5518	5524	5590	5747	5901	5997	6047	6101	6188	6249	6314	6446	6491	6566	6622	6651	6674	6683	6760	6790	6795	6867	6900	6904	6905	6993	7013	7175	7272	7283	7320	7405	7430	7465	7514	7516	7517	7756	8100	8243	8312	8409	8476	8481	8556	8658	8674	8678	8766	8841	8851	8882	9053	9055	9126	9148	9181	9183	9212	9371	9419	9475	9493	9525	9611	9639	9648	9662	9696	9700	9702	9738	9748	9768	9793	9820	9851	9857	9897	10013	10015	10039	10048	10112	10142	10252	10253	10297	10300	10345	10376	10403	10426	10432	10460	10464	10519	10540	10579	10615	10634	10636	10671	10733	10769	10783	10806	10844	11004	11075	11076	11104	11116	11190	11200	11261	11337	22809	22919	22933	22974	22994	22995	23032	23093	23113	23122	23160	23172	23177	23187	23255	23271	23299	23332	23354	23363	23380	23405	23639	24137	24139	25777	25809	25897	25978	25981	25999	26005	26054	26140	26146	26160	26271	26586	26973	27019	27124	27175	27185	27229	27243	27285	28989	29127	29899	50487	50810	50861	51119	51175	51199	51203	51364	51510	51652	51673	54461	54462	54617	54627	54768	54777	54801	54820	54828	54875	54908	54919	54930	54986	55012	55036	55125	55130	55142	55172	55201	55231	55559	55700	55722	55726	55755	55835	55857	55920	56171	56288	56776	56890	56907	57132	57159	57405	57519	57530	57562	57606	57662	57701	57787	58484	58526	59341	64446	64793	79000	79003	79441	79444	79582	79649	79864	79866	79884	79925	79929	79959	79969	80254	81027	81551	81565	81929	81930	83987	84084	84376	84445	84446	84501	84643	84722	85378	85440	85452	85458	89765	89780	89796	89927	90102	90417	91147	91978	92421	92749	93233	93323	94137	114791	115106	115948	116840	117178	122481	123811	123872	124602	124997	126731	128866	136332	139212	140609	146909	150465	151648	152185	152206	153241	159989	161582	163183	163786	200162	203068	220134	221074	221150	221421	246176	253012	256714	259266	282991	283431	283489	284076	284403	285643	285753	339829	345895	347240	348235	348654	352909	387755	388389	401236	653464
GO:0000245	GO:SPLICEOSOMAL COMPLEX ASSEMBLY	1653	4154	6426	6430	6431	6433	6606	6607	6631	6632	6633	6634	6635	6637	6733	6936	7536	7919	8175	8233	8487	8683	8996	9169	9416	9733	10181	10291	10569	10658	10713	10772	10907	10946	11168	11338	23020	23064	23451	24148	25804	27339	51340	51631	51747	54957	55015	55692	56853	57461	58155	79833	91746	135295
GO:0000266	GO:MITOCHONDRIAL FISSION	581	664	1352	1634	1723	2066	3791	4976	5071	9650	10059	10891	23259	51024	51537	54332	54471	54708	56181	56947	57805	64422	64423	65018	79594	80821	91137	113115	120892	125170	449520
GO:0000271	GO:POLYSACCHARIDE BIOSYNTHETIC PROCESS	160	178	207	208	1213	1950	2131	2132	2475	2632	2645	2673	2887	2931	2932	2992	2997	2998	3036	3037	3038	3340	3479	3481	3630	3643	3667	4790	5155	5167	5236	5260	5261	5499	5500	5507	5509	5734	5741	6233	7040	7311	7314	7316	7360	7957	8445	8660	8864	8908	9572	9852	10331	10580	10678	11041	23178	51763	53632	54187	55276	55454	55790	55829	55830	56052	79369	79660	83468	89801	90673	114898	374907	378884	648791
GO:0000272	GO:POLYSACCHARIDE CATABOLIC PROCESS	147	178	801	805	808	1118	1373	2538	2548	2992	3630	5213	5236	5255	5256	5257	5260	5261	5499	5500	5509	5834	5836	5837	8908	8972	8987	27159	55276	79660	90673
GO:0000280	GO:NUCLEAR DIVISION	25	109	324	332	387	472	546	652	655	675	676	685	699	701	811	816	858	890	891	899	900	901	940	983	984	989	990	991	993	994	995	996	998	1017	1018	1060	1062	1063	1068	1069	1070	1104	1111	1164	1213	1452	1457	1459	1613	1618	1639	1761	1814	1843	1877	1906	1908	1950	2029	2059	2069	2072	2175	2177	2253	2261	2263	2316	2669	2801	2827	2956	3070	3082	3209	3297	3306	3479	3480	3481	3552	3553	3619	3622	3630	3643	3796	3832	3833	3834	3835	3837	3955	3976	4041	4085	4288	4292	4342	4361	4436	4438	4439	4487	4488	4605	4659	4735	4739	4750	4751	4752	4762	4926	4927	5008	5048	5119	5139	5155	5159	5300	5347	5518	5536	5573	5719	5728	5810	5885	5888	5889	5890	5892	5901	5925	5932	6117	6152	6188	6196	6249	6597	6787	6790	6795	6847	6990	6993	7013	7039	7040	7153	7155	7156	7175	7272	7273	7314	7320	7321	7324	7329	7443	7465	7474	7516	7517	7756	7917	8021	8089	8091	8218	8239	8243	8379	8438	8452	8468	8556	8607	8621	8658	8678	8697	8766	8812	8881	8900	8914	8976	9024	9025	9088	9113	9126	9133	9150	9181	9183	9184	9212	9221	9232	9319	9371	9400	9493	9525	9555	9577	9585	9587	9639	9665	9700	9702	9735	9787	9793	9820	9897	9903	9918	9928	9937	9972	9985	10040	10051	10096	10097	10111	10201	10270	10274	10300	10361	10381	10388	10393	10403	10419	10426	10459	10464	10474	10534	10540	10592	10600	10609	10615	10636	10726	10734	10735	10744	10776	10783	10795	10844	10899	10907	10910	10982	11004	11022	11040	11044	11065	11078	11104	11113	11130	11144	11200	11243	11258	11331	11339	22897	22919	22924	22933	22974	23047	23063	23113	23122	23126	23137	23141	23172	23194	23212	23236	23244	23304	23310	23331	23332	23353	23354	23363	23383	23397	23421	23607	23626	23636	24137	25788	25836	25847	25858	25906	25936	25970	25978	26013	26255	26271	26524	27030	27085	27127	27183	27229	27243	27338	27436	28984	29082	29086	29127	29882	29901	29945	29988	50511	51143	51203	51207	51343	51429	51433	51434	51451	51510	51529	51530	51547	54069	54361	54443	54456	54461	54478	54514	54617	54627	54801	54820	54821	54888	54892	54908	54930	54962	54984	54998	55023	55055	55124	55137	55142	55143	55193	55320	55559	55706	55719	55726	55743	55795	55839	55844	55872	55920	55958	56154	56155	56158	56159	56603	56776	56907	56979	56984	56992	57026	57082	57132	57348	57405	57448	57542	57695	57697	57820	58484	63946	64151	64180	64282	64682	64793	66037	79003	79023	79075	79184	79187	79441	79444	79643	79866	79884	79892	79980	80124	80152	80218	80254	80346	81565	81610	81929	81930	83439	83461	83540	83852	83903	83987	84072	84101	84250	84445	84501	84643	84687	84690	84722	84861	84930	84944	85378	85444	89782	90293	90417	91272	91603	91646	91754	91782	92421	93323	93426	93973	112574	113130	114791	115106	116138	119504	121441	122402	124817	126353	126520	126731	127829	128866	129563	130951	132625	136647	136991	138474	145645	146691	146909	147841	147872	148479	150280	150365	151246	151648	152185	157313	164045	201161	201164	201254	219736	220134	221035	221150	245711	246184	253012	254528	255324	256126	257364	259266	283129	283489	283847	284257	284654	285498	285643	285753	286053	286151	339345	346673	348235	348654	348995	378708	387103	387893	494551	642636	644186	728637	728642	100130958	101928601
GO:0000281	GO:MITOTIC CYTOKINESIS	288	324	585	1072	1616	3925	4628	5347	5921	6711	9101	9493	9585	9820	10112	10617	22891	24137	26586	29083	29127	51203	51429	54443	55165	55909	112574	116840	129531	257364	285643
GO:0000288	GO:NUCLEAR-TRANSCRIBED MRNA CATABOLIC PROCESS, DEADENYLATION-DEPENDENT DECAY	677	678	1656	1973	1974	1975	1977	1981	4292	4848	4849	4850	5073	5393	5433	5436	7538	7832	9125	9337	9775	9924	10140	10605	11157	11340	22849	22894	23016	23019	23112	23404	23644	23658	25804	25819	25904	26986	27161	27257	27258	28960	29883	51010	51013	51690	54464	54512	55571	55802	56915	57472	57690	57819	80153	85456	115024	118460	149041	167227	196513	197135	219988	246175	255967	339345	340719	342977
GO:0000289	GO:NUCLEAR-TRANSCRIBED MRNA POLY(A) TAIL SHORTENING	1973	1974	1975	1977	1981	4292	4848	4849	4850	5073	5436	7538	7832	9125	9337	9775	9924	10140	10605	22849	23019	23112	25904	26986	27161	29883	55571	57472	57690	85456	246175	255967
GO:0000291	GO:NUCLEAR-TRANSCRIBED MRNA CATABOLIC PROCESS, EXONUCLEOLYTIC	1656	5393	5436	9337	11157	11340	22894	23016	23404	23644	23658	25804	27257	27258	28960	29883	51010	51013	51690	54464	54512	55802	56915	57472	57819	80153	115024	118460	129563	167227	196513	219988
GO:0000301	GO:RETROGRADE TRANSPORT, VESICLE RECYCLING WITHIN GOLGI	1523	2800	2803	5870	6653	9321	9382	9648	9950	10133	25839	54943	55690	79571	83452	84220	90196	285190	400966	653489	727851	729540	729857
GO:0000302	GO:RESPONSE TO REACTIVE OXYGEN SPECIES	25	100	142	177	224	231	301	318	328	337	343	347	348	355	358	374	383	388	475	538	572	578	596	652	655	664	836	847	890	948	983	1017	1236	1263	1277	1316	1410	1421	1471	1545	1571	1649	1719	1728	1785	1800	1843	1894	1906	1938	2021	2057	2074	2113	2146	2152	2168	2176	2185	2241	2281	2308	2335	2353	2395	2643	2700	2775	2861	2876	2877	2878	2882	2932	2936	2950	2983	3039	3040	3043	3066	3082	3091	3162	3184	3240	3329	3373	3553	3554	3569	3725	3741	3747	3840	3934	3939	3978	4151	4193	4217	4233	4314	4353	4358	4504	4548	4780	4842	4846	4973	5034	5052	5076	5156	5159	5164	5311	5321	5516	5536	5562	5580	5598	5599	5660	5796	5798	5829	5831	5970	6188	6278	6363	6382	6464	6546	6622	6647	6648	6649	6714	6770	6778	6869	7001	7057	7124	7128	7168	7173	7186	7225	7295	7296	7351	7352	7356	7703	8013	8061	8428	8644	8692	8754	8807	8877	8989	9104	9131	9283	9314	9588	9973	10013	10068	10105	10131	10276	10365	10399	10494	10516	10587	10628	10808	10891	10935	11179	11235	11315	23064	23135	23334	23411	25824	25828	27244	30001	51022	51157	51314	51526	51765	54205	54583	54840	54936	55364	57332	59338	65018	80310	83667	84203	84919	120892	133522	140823	143686	493869	573971
GO:0000303	GO:RESPONSE TO SUPEROXIDE	142	337	538	655	948	1719	1728	2074	2176	2643	4353	4504	4780	4846	5052	6647	6648	6649	7001	7124	7351	7352	9104	10516	11315	23334	51022	54936	573971
GO:0000305	GO:RESPONSE TO OXYGEN RADICAL	142	337	538	655	948	1719	1728	2074	2176	2643	4353	4504	4780	4846	5052	6647	6648	6649	7001	7124	7351	7352	9104	10516	10587	11315	23334	51022	54936	573971
GO:0000375	GO:RNA SPLICING, VIA TRANSESTERIFICATION REACTIONS	708	988	1207	1477	1478	1479	1653	1655	1659	1660	1859	2483	2521	2962	2963	3167	3178	3181	3183	3184	3185	3187	3188	3189	3190	3191	3192	3312	4116	4154	4654	4670	4686	4809	4841	4857	4904	5093	5094	5356	5411	5430	5431	5432	5433	5434	5435	5436	5437	5438	5439	5440	5441	5725	5936	5940	6421	6426	6427	6428	6429	6430	6431	6432	6433	6434	6606	6607	6625	6626	6627	6628	6629	6631	6632	6633	6634	6635	6636	6637	6638	6732	6733	6936	7072	7307	7375	7536	7919	8106	8175	8220	8233	8243	8487	8559	8570	8621	8683	8896	8899	8996	9092	9128	9129	9169	9295	9343	9410	9416	9589	9716	9733	9775	9785	9879	9939	9967	9991	10073	10081	10084	10181	10189	10199	10212	10236	10250	10262	10283	10284	10285	10286	10291	10419	10421	10450	10465	10492	10569	10594	10658	10713	10772	10907	10914	10921	10946	10949	10978	10992	11017	11030	11051	11066	11100	11157	11168	11171	11189	11193	11218	11338	22826	22913	22916	22938	22985	23013	23020	23064	23210	23398	23450	23451	23517	23524	23543	23658	24144	24148	25766	25804	25862	25929	25949	25980	26121	26528	26986	27257	27258	27316	27336	27339	28960	29890	29894	29896	50628	51163	51319	51340	51362	51428	51503	51585	51631	51634	51639	51645	51690	51691	51692	51729	51747	51808	53938	53981	54033	54496	54715	54957	54960	55015	55094	55225	55269	55285	55596	55599	55660	55692	55696	55734	55749	55954	56259	56339	56853	56949	57461	57703	57721	57794	57819	58155	58509	58517	59286	60625	60677	64783	65109	79084	79171	79596	79622	79760	79833	79869	81608	83443	84081	84292	84530	84811	84844	84991	85437	91746	96764	125950	127933	135295	146713	153527	154007	220988	256329	283375	340390	392517	100130932
GO:0000377	GO:RNA SPLICING, VIA TRANSESTERIFICATION REACTIONS WITH BULGED ADENOSINE AS NUCLEOPHILE	708	988	1207	1477	1478	1479	1653	1655	1659	1660	1859	2483	2521	2962	2963	3167	3178	3181	3183	3184	3185	3187	3188	3189	3190	3191	3192	3312	4116	4154	4654	4670	4686	4809	4841	4857	4904	5093	5094	5356	5411	5430	5431	5432	5433	5434	5435	5436	5437	5438	5439	5440	5441	5725	5936	5940	6421	6426	6427	6428	6429	6430	6431	6432	6433	6434	6606	6607	6625	6626	6627	6628	6629	6631	6632	6633	6634	6635	6636	6637	6638	6732	6733	6936	7072	7307	7375	7536	7919	8106	8175	8220	8233	8243	8487	8559	8621	8683	8896	8899	8996	9092	9128	9129	9169	9295	9343	9410	9416	9589	9716	9733	9775	9785	9879	9939	9967	9991	10073	10081	10084	10181	10189	10212	10236	10250	10262	10283	10284	10286	10291	10419	10421	10450	10465	10492	10569	10594	10658	10713	10772	10907	10914	10921	10946	10949	10978	10992	11017	11030	11051	11066	11100	11157	11168	11171	11189	11193	11218	11338	22826	22913	22916	22938	22985	23013	23020	23064	23210	23398	23450	23451	23517	23524	23543	23658	24144	24148	25766	25804	25862	25929	25949	25980	26121	26528	26986	27258	27316	27336	27339	28960	29890	29894	29896	50628	51163	51319	51340	51362	51428	51503	51585	51631	51634	51639	51645	51690	51691	51692	51729	51747	51808	53938	53981	54033	54496	54715	54957	54960	55015	55094	55225	55269	55285	55596	55599	55660	55692	55696	55734	55749	55954	56259	56339	56853	56949	57461	57703	57721	57794	57819	58155	58509	58517	59286	60625	60677	64783	65109	79084	79171	79596	79622	79760	79833	79869	81608	83443	84081	84292	84530	84811	84844	84991	85437	91746	96764	125950	127933	135295	146713	153527	154007	220988	256329	283375	340390	392517	100130932
GO:0000380	GO:ALTERNATIVE MRNA SPLICING, VIA SPLICEOSOME	1655	1859	3178	4116	4154	4654	4670	5725	5936	5940	6421	6426	6427	6431	6433	6434	8621	9589	9939	9967	10084	10181	10284	10569	10921	11189	23543	27316	29890	51319	54033	54715	56853	58517	60677	84081	84530	84991	127933	135295	146713
GO:0000381	GO:REGULATION OF ALTERNATIVE MRNA SPLICING, VIA SPLICEOSOME	1655	1859	4116	4154	4654	5725	5936	5940	6427	6431	6434	9589	9939	9967	10181	10284	10921	11189	23543	27316	29890	54033	54715	56853	58517	60677	84081	84530	127933	135295	146713
GO:0000387	GO:SPLICEOSOMAL SNRNP ASSEMBLY	1207	4686	6606	6607	6628	6631	6632	6633	6634	6635	6636	6637	7375	8487	9092	9129	9733	10073	10419	10421	10594	10772	11171	11218	22916	24148	25804	25929	25980	26121	27339	50628	51808	54496	54960	55696	79084	79760	79833	96764	135295
GO:0000398	GO:MRNA SPLICING, VIA SPLICEOSOME	708	988	1207	1477	1478	1479	1653	1655	1659	1660	1859	2483	2521	2962	2963	3167	3178	3181	3183	3184	3185	3187	3188	3189	3190	3191	3192	3312	4116	4154	4654	4670	4686	4809	4841	4857	4904	5093	5094	5356	5411	5430	5431	5432	5433	5434	5435	5436	5437	5438	5439	5440	5441	5725	5936	5940	6421	6426	6427	6428	6429	6430	6431	6432	6433	6434	6606	6607	6625	6626	6627	6628	6629	6631	6632	6633	6634	6635	6636	6637	6638	6732	6733	6936	7072	7307	7375	7536	7919	8106	8175	8220	8233	8243	8487	8559	8621	8683	8896	8899	8996	9092	9128	9129	9169	9295	9343	9410	9416	9589	9716	9733	9775	9785	9879	9939	9967	9991	10073	10081	10084	10181	10189	10212	10236	10250	10262	10283	10284	10286	10291	10419	10421	10450	10465	10492	10569	10594	10658	10713	10772	10907	10914	10921	10946	10949	10978	10992	11017	11030	11051	11066	11100	11157	11168	11171	11189	11193	11218	11338	22826	22913	22916	22938	22985	23013	23020	23064	23210	23398	23450	23451	23517	23524	23543	23658	24144	24148	25766	25804	25862	25929	25949	25980	26121	26528	26986	27258	27316	27336	27339	28960	29890	29894	29896	50628	51163	51319	51340	51362	51428	51503	51585	51631	51634	51639	51645	51690	51691	51692	51729	51747	51808	53938	53981	54033	54496	54715	54957	54960	55015	55094	55225	55269	55285	55596	55599	55660	55692	55696	55734	55749	55954	56259	56339	56853	56949	57461	57703	57721	57794	57819	58155	58509	58517	59286	60625	60677	64783	65109	79084	79171	79596	79622	79760	79833	79869	81608	83443	84081	84292	84530	84811	84844	84991	85437	91746	96764	125950	127933	135295	146713	153527	154007	220988	256329	283375	340390	392517	100130932
GO:0000413	GO:PROTEIN PEPTIDYL-PROLYL ISOMERIZATION	2280	2281	2286	2287	2288	2289	4820	5300	5303	5478	5479	5480	5481	5524	5903	8468	9360	10105	10283	10450	10465	11328	23398	23508	23759	23770	51303	51645	51661	53938	55033	60681	63943	85313	148014	283237	285755	644591	645142	653505	653598	728945	730262
GO:0000422	GO:MITOPHAGY	86	154	308	481	664	665	706	727	766	797	828	1029	1351	1404	1459	1513	1965	2011	2017	2040	2168	2176	2188	2215	2475	2542	2558	2647	2648	2660	2931	3091	3099	3250	3777	3866	4130	4190	4629	4638	4715	4741	4831	4913	5026	5071	5163	5194	5214	5232	5273	5290	5352	5539	5592	5604	6158	6233	6424	6507	6509	6529	6579	6581	6628	6632	6636	6720	6721	6773	7157	7182	7307	7311	7314	7316	7416	7709	7743	7786	7855	8110	8200	8208	8464	8504	8607	8678	8736	8878	9140	9469	9474	9688	9715	9776	9779	9783	9796	9798	9804	9868	9927	9982	10013	10059	10452	10456	10533	10675	10891	11077	11128	11140	11152	11173	11315	11338	11345	22863	22918	22985	23130	23192	23400	23710	23766	25758	25793	25804	25865	26100	27120	27198	27429	29801	29995	51000	51001	51024	51042	51116	51291	51306	51315	51320	51340	51538	51676	51729	54210	54212	54432	54543	55062	55102	55116	55132	55159	55163	55172	55173	55184	55194	55254	55294	55343	55361	55486	55626	55669	55777	56270	56993	57103	57154	57602	63910	64422	64768	65018	65991	79065	80216	80271	81631	83592	84033	84128	84557	84749	84938	84971	91653	93974	94059	94107	115201	132671	139341	139741	157807	200081	202374	283316	285973	319101	347359	374973	387849	401466	401505	440738	493856	643246	100188893
GO:0000423	GO:MACROMITOPHAGY	154	308	481	727	766	797	828	1351	1404	1965	2040	2168	2176	2188	2215	2542	2558	2647	2660	3099	3250	3777	3866	4130	4190	4629	4638	4715	4741	4831	4913	5026	5071	5163	5194	5214	5232	5273	5290	5352	5539	5592	5604	6233	6424	6507	6509	6529	6579	6581	6628	6632	6636	6773	7157	7182	7311	7314	7316	7416	7743	7786	8110	8200	8208	8464	8504	8678	8736	8878	9140	9469	9474	9688	9715	9776	9779	9783	9796	9798	9804	9868	9927	9982	10013	10452	10675	11077	11140	11173	22863	22918	22985	25758	25804	25865	27120	27198	29995	51000	51001	51042	51116	51291	51306	51315	51320	51340	51538	51676	54210	54212	54432	54543	55116	55132	55159	55163	55172	55173	55184	55194	55254	55343	55361	55626	55669	55777	56993	57103	57154	64768	65018	80216	80271	81631	83592	84033	84557	91653	93974	94059	94107	139741	157807	200081	202374	283316	319101	347359	374973	387849	401466	401505	100188893
GO:0000460	GO:MATURATION OF 5.8S RRNA	3921	5393	5394	6227	8602	10200	10438	11340	23016	23212	23246	23404	23481	23517	27340	29777	51010	54512	55759	79707	80135	117246
GO:0000462	GO:MATURATION OF SSU-RRNA FROM TRICISTRONIC RRNA TRANSCRIPT (SSU-RRNA, 5.8S RRNA, LSU-RRNA)	705	3921	5822	6202	6208	6217	6223	6227	6229	8602	9277	10607	10885	23212	25879	25983	27042	27340	29777	55127	55813	57050	64963	64965	88745	90121
GO:0000466	GO:MATURATION OF 5.8S RRNA FROM TRICISTRONIC RRNA TRANSCRIPT (SSU-RRNA, 5.8S RRNA, LSU-RRNA)	3921	5393	6227	8602	11340	23016	23212	23246	23404	23481	27340	29777	51010	55759	79707	117246
GO:0000578	GO:EMBRYONIC AXIS SPECIFICATION	1499	3170	3234	3975	4087	4089	4091	4435	5015	5046	5727	6491	6862	6911	6926	6997	7403	7471	7474	7476	7490	7855	9573	10023	10409	10787	10818	23242	26005	57669	80319	83439	92129	134701	163589	201164	441478
GO:0000715	GO:NUCLEOTIDE-EXCISION REPAIR, DNA DAMAGE RECOGNITION	142	1069	1642	1643	2873	5887	6233	7311	7314	7316	7508	8450	8451	8533	9318	9978	10920	10980	10987	50813	51138	64708
GO:0000722	GO:TELOMERE MAINTENANCE VIA RECOMBINATION	328	1763	2237	3978	5111	5422	5424	5425	5426	5427	5557	5558	5888	5981	5982	5983	5984	5985	6117	6118	6119	7011	7014	7517	10714	23137	23649	57804	79677	286053
GO:0000723	GO:TELOMERE MAINTENANCE	142	328	472	545	546	908	1499	1736	1763	2067	2072	2237	2547	3178	3183	3192	3978	4216	4361	4609	4683	4751	5111	5371	5422	5424	5425	5426	5427	5557	5558	5570	5588	5591	5594	5595	5609	5888	5892	5976	5981	5982	5983	5984	5985	6117	6118	6119	6672	6714	6950	7011	7013	7014	7015	7203	7486	7517	7520	7874	8290	8294	8359	8360	8361	8362	8363	8364	8365	8366	8367	8368	8370	8550	8658	9212	9937	10039	10111	10445	10574	10575	10576	10694	10714	10728	11284	22948	23049	23137	23293	23381	23649	24144	25913	26272	26277	26354	51750	54386	54433	54552	54984	55135	55226	55505	55651	55869	56252	57804	64421	64858	65057	79008	79035	79618	79677	79991	80119	80169	80351	84464	85456	121504	140609	170506	201516	225689	286053	548593	554313	100134934
GO:0000724	GO:DOUBLE-STRAND BREAK REPAIR VIA HOMOLOGOUS RECOMBINATION	25	142	472	545	580	641	672	675	1017	1111	1763	2067	2072	2237	3014	3364	3980	4361	4683	4796	5531	5810	5883	5884	5888	5889	5890	5892	5893	5932	5982	5983	5984	5985	6047	6117	6118	6119	6233	6421	6613	7156	7158	7311	7314	7316	7329	7334	7336	7341	7468	7486	7515	7516	7517	7528	7979	8290	8294	8317	8318	8359	8360	8361	8362	8363	8364	8365	8366	8367	8368	8370	8438	8914	8924	9025	9156	9577	9656	9907	9985	10111	10213	10524	10635	10721	10933	11073	11144	22909	23028	23137	23503	23514	25788	29086	51444	51548	51588	51659	51720	51750	54386	54617	54962	55010	55137	55317	55693	56154	57599	63967	63979	64859	79008	79035	79184	79677	79728	80010	80198	83695	83990	84126	84142	84296	84464	84515	84893	113510	116028	119392	121504	125150	126074	135458	144715	146956	147872	151987	165918	197370	253714	254394	254528	286053	348654	353497	375757	401720	548593	554313	642636
GO:0000725	GO:RECOMBINATIONAL REPAIR	25	142	472	545	580	641	672	675	1017	1111	1763	2067	2072	2237	3014	3364	3980	4361	4683	4796	5531	5810	5883	5884	5888	5889	5890	5892	5893	5932	5982	5983	5984	5985	6047	6117	6118	6119	6233	6421	6613	7156	7158	7311	7314	7316	7329	7334	7336	7341	7468	7486	7515	7516	7517	7528	7979	8290	8294	8317	8318	8359	8360	8361	8362	8363	8364	8365	8366	8367	8368	8370	8438	8914	8924	9025	9156	9577	9656	9907	9985	10111	10213	10524	10635	10721	10933	11073	11144	22909	23028	23137	23503	23514	25788	29086	51444	51548	51588	51659	51720	51750	54386	54617	54962	55010	55137	55317	55693	56154	57599	63967	63979	64859	79008	79035	79184	79677	79728	80010	80198	83695	83990	84126	84142	84296	84464	84515	84893	113510	116028	119392	121504	125150	126074	135458	144715	146956	147872	151987	165918	197370	253714	254394	254528	286053	348654	353497	375757	401720	548593	554313	642636
GO:0000726	GO:NON-RECOMBINATIONAL REPAIR	472	580	672	2547	3014	3978	3980	3981	4292	4361	4683	4968	5422	5591	5893	5932	6419	7158	7334	7336	7341	7405	7468	7518	7520	7913	8091	8290	8294	8359	8360	8361	8362	8363	8364	8365	8366	8367	8368	8370	8924	9025	9577	9656	9937	10111	10213	10524	10721	22976	22992	24144	27339	27343	27434	29086	51444	51588	51720	55183	55693	64421	64858	79008	79184	79840	84142	84464	91419	121504	165918	286257	548593	554313
GO:0000737	GO:DNA CATABOLIC PROCESS, ENDONUCLEOLYTIC	317	581	668	836	1029	1149	1676	1677	1776	1777	2021	3005	3146	3148	3836	3837	6419	9131	23405	23626	27443	80198	84893
GO:0000768	GO:SYNCYTIUM FORMATION BY PLASMA MEMBRANE FUSION	577	779	824	831	859	963	1432	2323	2932	3565	3566	3627	3756	4283	4617	4618	4627	4654	4656	4756	4773	4842	4868	5308	6387	6772	7471	8038	8521	8536	8740	8754	8837	8912	9149	9518	9644	10211	10411	10938	22904	30846	50937	51177	56300	81501	85461	90342	92304	128506	135228	389827
GO:0000819	GO:SISTER CHROMATID SEGREGATION	324	472	546	699	701	891	990	991	996	1062	1063	1457	1459	1499	1663	1843	3833	3834	3835	3837	4085	4342	4361	4751	5119	5347	5518	5728	5889	5925	6421	7013	7153	7155	7175	7272	7273	7321	7324	7517	7756	8243	8313	8379	8452	8658	8678	8697	8766	8881	9113	9126	9183	9184	9232	9525	9555	9700	9702	9787	9918	9928	9985	10051	10300	10393	10403	10459	10464	10592	10615	10664	10735	10744	10783	11004	11044	11065	11113	11130	11331	23047	23063	23126	23137	23212	23244	23310	23383	23397	25836	25906	25978	26255	26271	27127	27183	27243	29082	29882	29945	51143	51203	51433	51434	51451	51510	51529	54617	54908	54984	55143	55294	55719	55795	55869	56155	56984	57132	64151	64682	79003	79075	79643	79892	80218	81929	81930	83903	84072	84101	84250	84722	84861	90417	91782	92421	113130	114799	119504	128866	129563	146909	148479	150280	151246	246184	283489	285753	286053	346673	348654	728637
GO:0000910	GO:CYTOKINESIS	288	324	332	387	388	389	403	585	598	643	675	801	805	808	989	990	994	998	1069	1072	1263	1613	1616	1730	1813	1814	1894	2652	3619	3925	4627	4628	5289	5300	5347	5413	5581	5586	5898	5899	5921	5956	6651	6683	6711	6755	6790	6795	6840	7405	8452	8502	8678	8766	9055	9101	9212	9371	9475	9493	9585	9700	9727	9738	9798	9820	9826	9897	9903	9928	10096	10097	10112	10617	10755	10783	10807	10899	11021	11113	11258	22891	23157	23503	24137	25909	26189	26586	27183	27443	28964	29083	29127	30849	50838	51100	51203	51289	51429	54443	54627	54784	54902	55165	55231	55660	55909	55958	56155	56776	56907	57026	57448	63971	79400	79541	79733	79848	79884	80834	84440	84445	84501	84936	90293	92421	112574	116840	117194	129531	140609	144455	152015	201161	201163	257364	285643	728458
GO:0000920	GO:CELL SEPARATION AFTER CYTOKINESIS	5119	9525	10015	10112	25978	27183	27243	29082	51510	51652	55165	57132	79643	91782	92421	128866	129531
GO:0000956	GO:NUCLEAR-TRANSCRIBED MRNA CATABOLIC PROCESS	472	677	678	1656	1797	1973	1974	1975	1977	1981	2107	2197	2935	3646	3921	4116	4292	4686	4736	4848	4849	4850	5073	5393	5394	5433	5436	5515	5518	5520	5976	6122	6123	6124	6125	6128	6129	6130	6132	6133	6134	6135	6136	6137	6138	6139	6141	6142	6143	6144	6146	6147	6152	6154	6155	6156	6157	6158	6159	6160	6161	6164	6165	6167	6168	6169	6170	6171	6173	6175	6176	6181	6187	6188	6189	6191	6192	6193	6194	6201	6202	6203	6204	6205	6206	6207	6208	6209	6210	6217	6218	6222	6223	6224	6227	6228	6229	6230	6231	6232	6233	6234	6235	7311	7538	7812	7832	8559	9045	9125	9337	9349	9704	9775	9811	9887	9924	9939	9967	10140	10605	10921	11157	11224	11340	22794	22849	22894	22916	23016	23019	23049	23112	23293	23381	23404	23521	23644	23658	23708	25804	25819	25873	25904	26019	26523	26986	27161	27257	27258	28960	29883	51010	51013	51121	51594	51690	53918	54464	54512	55110	55149	55181	55571	55629	55802	56006	56915	57472	57690	57819	64282	65109	65110	79048	80149	80153	84305	85456	115024	118460	127933	129563	149041	167153	167227	196513	197135	219988	246175	255967	339345	340719	342977
GO:0000959	GO:MITOCHONDRIAL RNA METABOLIC PROCESS	3028	5442	6182	6832	7019	7978	9692	10128	25821	51067	51095	54802	54931	55006	55157	55687	56652	57505	57570	60493	60528	64216	79736	80222	80298	80324	81892	84275	84705	87178	124454	130916	133522
GO:0001101	GO:RESPONSE TO ACID CHEMICAL	15	16	19	27	31	54	112	177	207	210	229	231	338	345	355	358	359	360	383	429	440	445	493	552	572	590	598	652	654	824	836	847	891	928	948	952	1027	1032	1036	1051	1072	1109	1147	1196	1236	1244	1277	1278	1281	1282	1290	1291	1307	1373	1374	1385	1386	1490	1512	1535	1571	1586	1620	1645	1646	1719	1786	1788	1789	1812	1843	1869	1906	1911	1938	1956	1958	2042	2100	2170	2180	2185	2308	2335	2348	2350	2475	2695	2696	2741	2742	2743	2778	2782	2796	2864	2865	2867	2932	2934	2937	2950	3066	3091	3141	3145	3155	3158	3184	3190	3198	3199	3208	3294	3371	3383	3482	3485	3551	3553	3569	3605	3651	3673	3843	3856	3860	3952	3990	4058	4067	4155	4255	4277	4313	4314	4340	4524	4656	4671	4830	4899	4914	4915	4916	4968	5009	5020	5030	5031	5076	5154	5155	5159	5165	5166	5176	5244	5289	5311	5444	5468	5562	5563	5581	5724	5727	5729	5732	5734	5737	5742	5743	5753	5754	5764	5914	5916	5950	5970	5979	6045	6096	6198	6256	6347	6352	6363	6366	6422	6470	6494	6506	6532	6602	6657	6662	6672	6678	6714	6720	6750	6862	6869	6899	6935	7009	7020	7037	7049	7054	7075	7078	7124	7292	7298	7351	7356	7472	7473	7474	7475	7477	7478	7479	7480	7481	7483	7484	7494	7525	7528	7584	8001	8170	8273	8322	8324	8443	8463	8473	8644	8648	8649	8651	8854	9131	9148	9314	9356	9370	9510	9536	9971	10067	10325	10400	10411	10413	10542	10626	10670	10891	11211	11344	22849	22850	22938	22943	23064	23304	23376	23677	26012	27429	28956	50801	51079	51141	54331	54332	54834	54929	54997	55004	55022	55172	55904	55915	56034	57521	57795	58528	64121	64506	65985	80149	80310	80315	80781	81029	81285	84649	84867	84918	89780	124641	130497	153129	158800	171023	197131	205860	222545	339479	340485	346673	375611	389541	441509	573971
GO:0001501	GO:SKELETAL SYSTEM DEVELOPMENT	53	54	92	93	94	165	166	176	197	249	257	265	302	387	415	537	538	579	583	632	649	650	651	652	653	654	655	656	657	658	659	779	860	861	864	871	960	1009	1028	1044	1101	1116	1240	1277	1278	1280	1281	1290	1297	1298	1300	1301	1302	1303	1305	1310	1311	1404	1432	1462	1463	1490	1499	1739	1745	1746	1749	1750	1834	1906	1954	1969	2019	2033	2099	2101	2114	2121	2131	2134	2138	2200	2201	2202	2247	2249	2251	2253	2254	2260	2261	2263	2296	2303	2313	2487	2658	2662	2688	2702	2734	2736	2737	2767	2776	2778	2822	3037	3074	3091	3198	3199	3200	3202	3203	3204	3205	3206	3207	3209	3211	3212	3213	3214	3215	3216	3217	3218	3219	3221	3222	3223	3224	3225	3226	3227	3231	3232	3233	3234	3235	3236	3237	3238	3239	3292	3339	3340	3373	3425	3479	3481	3487	3491	3549	3623	3636	3638	3696	3714	3815	3950	3952	3958	3975	4017	4040	4041	4057	4060	4086	4087	4088	4090	4093	4094	4146	4148	4188	4208	4209	4211	4256	4313	4318	4322	4323	4325	4487	4488	4522	4617	4653	4664	4665	4781	4838	4856	4880	4882	4883	4920	4982	5027	5048	5052	5075	5079	5081	5087	5125	5154	5156	5159	5191	5251	5305	5307	5308	5310	5358	5364	5396	5447	5469	5479	5549	5578	5595	5636	5663	5734	5741	5744	5745	5777	5781	5788	5914	5915	5916	5950	5970	6169	6197	6261	6399	6422	6423	6468	6469	6473	6474	6495	6497	6591	6615	6659	6660	6662	6664	6667	6670	6678	6694	6714	6715	6716	6722	6781	6862	6886	6899	6913	6926	6935	6939	6949	7004	7010	7020	7040	7042	7043	7045	7046	7048	7057	7059	7067	7071	7076	7092	7123	7227	7289	7291	7298	7305	7353	7398	7421	7468	7471	7474	7476	7477	7480	7481	7482	7483	7484	7703	7704	7763	8091	8092	8111	8195	8200	8312	8313	8372	8538	8575	8600	8626	8642	8646	8692	8788	8817	8879	9060	9061	9104	9241	9249	9350	9421	9451	9464	9496	9507	9573	9742	9759	9770	9775	9869	9968	10006	10143	10163	10220	10234	10265	10498	10507	10522	10631	10655	10682	10683	10736	10743	10859	10865	11061	11173	22856	23169	23213	23218	23314	23405	23705	25836	25884	25902	25946	25976	26160	26276	26585	27086	27173	27230	27302	28982	29072	29123	29985	50515	51119	51141	51320	51450	51668	51684	51715	51738	51741	51804	53834	54360	54475	54799	54808	54903	54928	55252	55553	55636	55790	55959	56034	56172	56243	56603	56914	56955	56975	56987	57453	57599	59338	60484	60529	60676	63827	64175	64399	64651	64764	65057	79001	79633	79705	79925	79977	80169	80199	80263	80739	80856	81029	81792	83452	84159	84667	84895	85301	85477	91461	92129	112744	116039	117166	117581	124565	124857	124976	130497	133522	134701	139285	144347	145258	145864	150356	157506	158326	161882	162466	171023	196527	202018	284266	285590	338773	340260	340419	342184	353500	359845	375056	387733	388585	389058	389125	392255	399979	404037	642658	100533183
GO:0001502	GO:CARTILAGE CONDENSATION	649	658	1280	1301	1432	1490	2249	2251	4256	4617	4920	5310	6662	7042	7067	7476	8092	8538	56914	340260
GO:0001503	GO:OSSIFICATION	43	54	90	92	93	103	154	182	197	207	246	249	265	324	374	387	433	506	525	537	596	632	649	650	651	652	653	654	655	656	657	658	659	796	846	847	860	861	864	865	1009	1021	1050	1051	1192	1213	1230	1277	1280	1290	1291	1300	1301	1305	1435	1462	1490	1499	1513	1591	1594	1655	1660	1749	1758	1834	1836	1893	1901	1956	1959	1969	2068	2079	2091	2099	2101	2131	2132	2185	2194	2201	2254	2260	2261	2263	2274	2296	2303	2550	2623	2658	2662	2697	2719	2735	2736	2737	2778	2822	2824	3082	3091	3183	3192	3199	3295	3336	3339	3371	3376	3381	3397	3398	3399	3400	3479	3481	3486	3488	3491	3516	3549	3569	3570	3572	3611	3636	3726	3727	3952	4000	4038	4041	4057	4077	4086	4088	4090	4146	4208	4209	4221	4256	4313	4318	4322	4323	4325	4330	4435	4488	4617	4653	4656	4664	4665	4745	4763	4851	4880	4882	4921	4958	5020	5027	5029	5087	5121	5167	5179	5191	5245	5251	5321	5364	5552	5566	5587	5599	5701	5727	5734	5741	5743	5744	5745	5747	5764	6096	6169	6205	6209	6238	6261	6272	6348	6422	6423	6469	6474	6497	6546	6569	6591	6608	6615	6657	6662	6664	6667	6670	6678	6696	6779	6781	6863	6869	6934	7010	7020	7040	7042	7043	7059	7067	7071	7123	7124	7166	7171	7189	7286	7290	7291	7473	7474	7477	7480	7481	7704	8074	8313	8321	8482	8519	8600	8626	8642	8646	8792	8817	8994	9063	9087	9188	9241	9249	9260	9350	9365	9451	9464	9562	9759	9770	9788	9902	9923	9970	10014	10140	10189	10272	10399	10457	10492	10507	10514	10736	10766	22800	22801	22856	22904	23020	23051	23314	23317	23353	23376	23462	23560	23601	25819	25836	25842	25884	25937	26156	26578	26585	27044	27152	27316	30812	50506	50617	50964	51025	51119	51176	51374	51430	51564	51684	51741	54361	54829	54880	54928	55252	55363	55366	55589	55787	55790	55973	56172	56955	56975	56998	57003	57045	57154	57665	58476	63979	64093	64096	64175	79176	79633	79697	80381	81621	89780	90993	91461	91851	115908	116039	117581	121340	130497	133522	134701	144347	162466	169200	170506	196527	221044	255743	285313	338773	340419	344901	353500	359845	375056	387733	642658	100533183
GO:0001504	GO:NEUROTRANSMITTER UPTAKE	477	1812	1813	1814	1815	1861	2055	2668	2670	2752	2824	3766	4842	5071	5865	6507	6531	6532	6570	6581	6616	6622	8864	11315	81539
GO:0001505	GO:REGULATION OF NEUROTRANSMITTER LEVELS	18	41	43	217	223	320	477	488	673	747	773	774	815	1020	1103	1136	1143	1201	1312	1812	1813	1814	1815	1855	1861	2054	2055	2555	2571	2572	2644	2668	2670	2744	2752	2824	2852	2901	2914	3060	3312	3748	3749	3766	4128	4208	4763	4803	4842	4915	5027	5053	5058	5071	5153	5217	5413	5538	5663	5734	5799	5864	5865	5868	5906	6505	6506	6507	6511	6512	6529	6531	6532	6536	6538	6539	6540	6570	6571	6572	6581	6582	6616	6622	6623	6804	6809	6810	6812	6844	6853	6854	6857	6860	6865	7054	7476	7779	7915	8224	8292	8447	8448	8497	8499	8500	8541	8573	8618	8676	8773	8775	8825	8864	8867	8877	8938	9162	9256	9342	9369	9378	9379	9381	9627	9699	9751	9783	10003	10497	10814	10815	11255	11315	22859	22871	22930	22999	23025	23208	23396	23513	23557	25953	26258	27165	27345	27445	51222	51248	54407	55327	55607	57030	60482	64130	80331	80736	81539	84062	84446	91683	93664	112755	114088	116841	120892	127833	140679	140730	145270	220074	221955	339302	415117	594855	643752
GO:0001508	GO:ACTION POTENTIAL	148	287	288	476	477	481	488	773	774	775	776	777	778	779	785	817	857	859	1134	1137	1141	1143	1180	1201	1268	1269	1525	1756	1804	1812	1824	1829	1832	2257	2281	2697	2702	2741	2767	2776	2852	2898	3458	3728	3736	3737	3741	3745	3747	3751	3753	3757	3759	3778	3784	4544	4897	4923	5023	5024	5025	5074	5318	5774	6262	6323	6324	6326	6327	6328	6329	6330	6331	6332	6334	6335	6336	6546	6548	6640	6717	6863	6869	7341	7531	7533	8506	8911	8912	8913	9465	9472	9631	9722	9992	10021	10052	10242	11280	23171	23327	23630	27094	27345	29098	29119	53373	54112	55800	57369	79784	117144	117155	149461	219931	259232	347732	378807	388591	594857
GO:0001510	GO:RNA METHYLATION	1787	2091	4234	6894	8731	9589	9836	10436	10785	23070	24140	25962	27037	27292	29960	51093	51106	51504	51531	51605	54482	54888	54931	55006	55178	55621	55783	55798	56257	56339	57570	57721	60487	63899	64216	79066	79922	79979	91801	91893	93587	96764	113802	115708	117246	144233	152992	154743	196074	339175	345630	387338	100130758
GO:0001516	GO:PROSTAGLANDIN BIOSYNTHETIC PROCESS	301	551	552	873	972	1906	1907	3248	4282	5321	5601	5730	5740	5742	5743	6916	8644	8877	9536	10464	10728	22949	23411	27306	50640	80142	127281	255189
GO:0001522	GO:PSEUDOURIDINE SYNTHESIS	1736	26995	27079	54433	54517	55505	55651	80324	83448	83480	84881	92345	113000	126789	142940	150962	285367
GO:0001523	GO:RETINOID METABOLIC PROCESS	24	127	128	131	216	220	335	336	337	338	344	345	348	611	1109	1208	1381	1382	1543	1545	1592	1645	2239	2262	2652	2719	2817	3339	3949	4023	4035	4036	5406	5467	5919	5947	5948	5949	5950	5956	5959	6010	6017	6121	6382	6383	6385	7276	7804	8644	8694	8854	9227	9249	9672	10082	10170	50700	51109	53630	54576	54577	54600	54658	54659	54884	55937	56603	57016	57665	59342	64220	64577	83875	84649	91464	145226	151056	157506	158835	195814	221914	222236	285440	340665	375790	728458
GO:0001525	GO:ANGIOGENESIS	14	90	94	101	133	154	182	183	239	283	284	285	290	302	306	347	350	354	356	358	387	388	506	575	576	577	578	581	634	652	672	688	694	718	719	727	728	729	841	857	861	889	947	998	1012	1116	1139	1215	1232	1282	1284	1285	1295	1296	1306	1395	1432	1464	1490	1499	1512	1524	1545	1634	1890	1893	1901	1906	1909	1942	1948	1950	1960	1969	1990	2004	2013	2022	2028	2034	2041	2047	2048	2049	2050	2064	2069	2113	2152	2185	2191	2246	2247	2251	2253	2254	2255	2260	2263	2277	2296	2303	2321	2324	2335	2624	2626	2627	2637	2658	2683	2702	2821	2822	2833	2837	2876	2969	3082	3087	3091	3146	3162	3164	3200	3202	3204	3213	3273	3315	3339	3373	3397	3491	3516	3549	3552	3553	3569	3576	3579	3606	3627	3670	3678	3685	3688	3689	3690	3716	3725	3791	3848	3911	3952	3976	4017	4041	4162	4211	4223	4240	4303	4313	4323	4327	4627	4691	4763	4775	4776	4838	4846	4851	4854	4855	4856	4879	4881	4897	4914	5054	5140	5154	5156	5159	5168	5176	5196	5228	5290	5291	5294	5308	5316	5328	5333	5335	5371	5469	5547	5578	5579	5587	5598	5607	5613	5728	5740	5743	5747	5764	5787	5797	6019	6050	6091	6093	6095	6237	6278	6303	6347	6352	6355	6356	6369	6376	6387	6422	6423	6461	6464	6469	6672	6678	6688	6722	6733	6772	6789	6850	6885	6886	6899	6915	6943	6997	7010	7042	7045	7046	7048	7057	7058	7060	7070	7075	7101	7127	7128	7291	7342	7410	7422	7423	7424	7453	7474	7476	7477	7494	7716	7855	7857	8325	8742	8751	8817	8828	8829	8877	9037	9047	9255	9270	9289	9314	9353	9369	9378	9394	9421	9451	9464	9475	9496	9723	9734	9990	10014	10016	10163	10203	10266	10267	10411	10451	10481	10519	10553	10563	10672	10855	10908	10911	11005	11061	11082	11235	22846	23129	23166	23210	23213	23328	23405	23411	23462	23509	23554	23576	23592	23645	25865	25932	25960	26051	26254	26585	27035	27286	27329	28514	28984	28996	29072	51129	51162	51176	51330	51378	51564	51738	51752	54345	54538	54567	54583	54828	54922	55109	55273	55333	55576	55742	56005	56913	57007	57057	57105	57125	57343	57674	58495	58504	60675	64102	64218	64321	64344	64783	79031	79400	79602	79625	79733	79805	79812	79924	80149	80155	80781	81575	83478	83700	83854	84432	84870	90268	90627	91010	92140	93974	112744	113026	116150	116844	126259	144455	146850	147372	153090	154796	164656	168667	204851	219699	221981	255324	284340	391104	441478	641700	729230
GO:0001539	GO:CILIUM OR FLAGELLUM-DEPENDENT CELL MOTILITY	583	585	1768	1769	5991	8195	8632	25981	29105	54777	55172	55567	56171	79582	92749	117144	126731	144535	146754	221421	339829
GO:0001541	GO:OVARIAN FOLLICLE DEVELOPMENT	116	196	268	283	408	409	581	596	598	652	658	668	726	898	1051	1103	1495	2069	2099	2100	2188	2189	2252	2296	2309	2488	2491	2492	2796	3190	3383	3623	3624	3625	3791	3815	3955	4254	4323	4327	4438	5734	6647	6874	7337	7422	7425	7784	8890	8892	8893	9210	9468	9757	11144	23054	23626	63951	83943	89766	91603	135935	344758	346673	402381
GO:0001556	GO:OOCYTE MATURATION	283	675	891	994	1618	2069	2185	2309	3640	4880	4882	5139	5518	6196	6790	9319	9897	9985	11144	22933	26271	80336	122042	494551
GO:0001558	GO:REGULATION OF CELL GROWTH	25	91	94	102	183	185	186	207	239	322	323	348	393	486	551	552	596	604	623	627	659	684	694	780	817	859	952	978	984	998	1002	1020	1026	1027	1029	1031	1032	1154	1382	1410	1457	1490	1535	1594	1630	1654	1785	1808	1826	1839	1946	1954	2017	2023	2045	2064	2100	2137	2147	2182	2185	2203	2258	2273	2305	2335	2395	2475	2487	2658	2661	2697	2786	2803	2810	2837	2931	2932	3009	3020	3021	3084	3172	3190	3249	3273	3373	3475	3479	3484	3485	3486	3487	3488	3489	3490	3491	3558	3578	3611	3621	3624	3630	3872	3897	3984	4009	4088	4089	4131	4137	4323	4487	4504	4633	4686	4722	4803	4825	4856	4878	4879	4881	4897	4916	4974	5048	5071	5167	5245	5270	5300	5361	5362	5371	5393	5467	5468	5515	5518	5538	5588	5607	5645	5654	5716	5795	5931	6049	6195	6197	6236	6279	6280	6386	6387	6405	6422	6423	6446	6494	6548	6586	6595	6597	6695	6696	6722	6792	6794	6832	6857	6860	6868	6880	7040	7042	7046	7143	7157	7216	7251	7349	7373	7422	7473	7474	7481	7490	7869	7919	8153	8314	8425	8437	8482	8548	8692	8711	8725	8751	8766	8829	8835	8838	8839	8840	8851	8877	9037	9150	9166	9211	9344	9353	9362	9423	9472	9538	9564	9625	9699	9706	9723	9746	9792	9798	9826	9928	10071	10110	10154	10201	10235	10276	10371	10399	10439	10459	10488	10500	10501	10505	10507	10509	10512	10516	10519	10591	10634	10669	10718	11007	11054	11082	11108	11116	11170	11344	22850	22883	22902	22954	22999	23011	23025	23111	23122	23129	23136	23327	23394	23404	23411	23499	23566	23677	23678	26153	26585	27000	27185	27296	27302	27346	29104	29882	29946	29948	50618	51009	51079	51083	51094	51176	51193	51196	51232	51293	51330	51379	51393	51447	51616	51760	53335	54437	54512	54617	54825	54879	54910	55031	55035	55540	55558	55602	55840	56920	56994	57142	57154	57446	57556	57611	57698	57699	57715	57805	58189	58191	60676	64061	64218	64321	65078	65981	79594	79602	79960	80031	80736	81501	81565	81621	83737	84162	84258	84260	84275	84678	84687	84717	84722	85004	89780	91584	92304	93649	94031	112398	123879	127833	131566	134430	135644	136319	147138	147906	150465	151242	151835	201163	203100	203245	221476	221937	223117	340152	343472	347252	374946	401135	440093	728642	729230	100533105
GO:0001562	GO:RESPONSE TO PROTOZOAN	602	951	958	1130	3394	3458	3565	3566	3569	3586	3592	3593	3662	6556	6693	8870	10077	10538	64581	79679	116071
GO:0001568	GO:BLOOD VESSEL DEVELOPMENT	14	59	90	93	94	101	133	154	163	182	183	196	207	239	283	284	285	290	302	306	338	347	348	350	354	356	358	387	388	506	538	575	576	577	578	581	634	639	652	655	659	672	677	688	694	718	719	727	728	729	841	857	861	889	947	998	1000	1003	1012	1045	1046	1116	1121	1139	1215	1232	1277	1278	1281	1282	1284	1285	1289	1295	1296	1306	1395	1399	1432	1464	1482	1490	1499	1512	1524	1545	1634	1649	1717	1747	1785	1890	1893	1901	1906	1909	1942	1948	1950	1954	1958	1960	1969	1990	2004	2013	2022	2028	2034	2041	2047	2048	2049	2050	2064	2069	2113	2116	2138	2152	2185	2191	2246	2247	2251	2253	2254	2255	2260	2263	2277	2294	2296	2303	2305	2307	2308	2321	2324	2335	2348	2624	2626	2627	2637	2658	2683	2697	2701	2702	2719	2737	2821	2822	2833	2837	2852	2876	2889	2969	3037	3082	3087	3091	3146	3162	3164	3198	3200	3202	3204	3209	3213	3248	3273	3280	3315	3339	3340	3373	3397	3491	3516	3549	3552	3553	3569	3576	3579	3606	3627	3670	3678	3679	3685	3688	3689	3690	3696	3716	3725	3726	3791	3848	3911	3952	3976	3993	4015	4016	4017	4035	4036	4041	4052	4066	4091	4092	4162	4193	4208	4211	4215	4223	4240	4303	4313	4323	4327	4435	4627	4628	4638	4643	4691	4734	4763	4775	4776	4824	4838	4846	4851	4853	4854	4855	4856	4879	4881	4897	4914	4915	5054	5080	5125	5140	5154	5155	5156	5159	5168	5175	5176	5196	5228	5290	5291	5294	5308	5310	5311	5316	5328	5333	5335	5345	5371	5396	5469	5547	5578	5579	5587	5594	5598	5604	5607	5613	5626	5629	5663	5728	5734	5740	5743	5747	5754	5764	5787	5795	5797	5906	5921	6019	6050	6091	6093	6095	6237	6278	6303	6347	6352	6355	6356	6369	6376	6387	6422	6423	6461	6464	6469	6495	6608	6659	6672	6678	6688	6692	6722	6733	6772	6789	6850	6862	6885	6886	6899	6909	6910	6915	6926	6934	6943	6997	7010	7021	7026	7042	7045	7046	7048	7057	7058	7060	7070	7075	7101	7127	7128	7137	7291	7342	7410	7422	7423	7424	7453	7472	7474	7476	7477	7481	7490	7494	7498	7541	7716	7798	7855	7857	7994	8061	8131	8289	8322	8325	8434	8456	8463	8613	8710	8742	8751	8817	8828	8829	8854	8877	8879	8928	9021	9037	9047	9255	9270	9289	9314	9353	9369	9378	9394	9421	9444	9451	9464	9475	9496	9693	9723	9734	9784	9820	9990	10014	10016	10052	10163	10203	10266	10267	10352	10411	10413	10427	10451	10454	10481	10512	10519	10553	10563	10672	10855	10908	10911	10959	11005	11061	11064	11082	11146	11174	11235	22846	22976	23054	23129	23166	23210	23213	23328	23405	23411	23414	23462	23493	23509	23554	23576	23592	23645	25831	25865	25932	25960	25976	26051	26057	26254	26259	26585	27035	27286	27329	28514	28982	28984	28996	29072	50814	51129	51162	51176	51330	51378	51450	51564	51666	51684	51738	51752	54345	54361	54538	54567	54583	54815	54828	54922	55109	55273	55294	55333	55576	55636	55662	55742	55897	56005	56848	56913	57007	57057	57105	57125	57178	57343	57493	57496	57534	57674	58495	58504	60675	64102	64218	64220	64321	64344	64783	65250	79031	79400	79602	79625	79659	79733	79805	79812	79924	80149	80155	80199	80310	80712	80781	81575	83478	83605	83700	83854	84432	84516	84870	90268	90627	91010	92140	93649	93974	112744	113026	116150	116844	118856	126259	130497	144165	144455	146850	147372	153090	154796	164656	168667	204851	219699	221981	255324	284217	284340	374654	391104	441478	641700	729230
GO:0001569	GO:PATTERNING OF BLOOD VESSELS	90	578	581	1282	1499	1906	1909	2022	2253	2303	2637	2658	3549	4041	4775	4776	4855	5308	6387	6423	6469	6688	6722	6789	7048	7422	7477	8829	9037	9723	10672	23129	51176	54567	57057	64783	441478
GO:0001570	GO:VASCULOGENESIS	133	677	857	947	1482	1499	1969	2013	2022	2305	2658	3037	3087	3209	3726	3791	4435	4643	4851	4915	5159	5308	5747	5795	5906	5921	6469	6608	6862	6910	6997	7048	7075	7137	7422	7476	7477	7490	7498	8322	8463	8879	9444	9693	9820	10052	10266	10352	10413	11146	22976	23414	23462	23493	25976	29072	51162	51564	51666	54345	54922	55109	55273	55294	55662	57007	57178	57493	64321	83605	93649	154796
GO:0001573	GO:GANGLIOSIDE METABOLIC PROCESS	2583	2760	3074	3696	4758	4759	6482	6483	6484	6487	7903	8128	8869	10402	10610	10825	27090	30815	51046	54982	55808	81849	129807	140873	256435	338596
GO:0001574	GO:GANGLIOSIDE BIOSYNTHETIC PROCESS	2583	6482	6483	6484	6487	7903	8128	8869	10402	10610	27090	30815	51046	55808	81849	140873	256435	338596
GO:0001578	GO:MICROTUBULE BUNDLE FORMATION	583	827	1767	2242	4131	4133	5347	6101	6249	6674	6683	7320	7756	8100	8481	9148	10112	10634	11076	11104	11261	23093	23255	23332	23639	25809	25981	26140	27019	27285	50487	51364	51673	54462	54768	54777	54919	55036	55130	55172	55201	55755	56171	57701	57787	64446	79582	79864	79925	84722	85452	89765	89796	91978	92749	93233	94137	115948	122481	123872	136332	139212	161582	200162	221421	246176	284076	339829	345895	352909	388389
GO:0001580	GO:DETECTION OF CHEMICAL STIMULUS INVOLVED IN SENSORY PERCEPTION OF BITTER TASTE	563	765	1469	1470	1472	2779	2780	4025	5284	5304	5726	50831	50832	50833	50834	50836	50837	50838	50839	50840	54429	64108	83597	132112	259285	259286	259289	259290	259292	259293	259296	285093	344892
GO:0001649	GO:OSTEOBLAST DIFFERENTIATION	43	90	92	93	103	182	207	249	265	324	374	506	537	632	650	651	652	654	655	657	658	659	847	860	865	1021	1050	1051	1192	1213	1277	1291	1462	1499	1591	1655	1660	1749	1969	2079	2091	2099	2101	2194	2201	2254	2260	2263	2274	2550	2658	2662	2697	2735	2736	2737	2778	3082	3183	3192	3199	3295	3336	3371	3376	3381	3397	3398	3399	3400	3479	3486	3488	3491	3549	3569	3570	3572	3611	3726	3727	4000	4041	4057	4077	4086	4088	4090	4208	4209	4221	4322	4435	4488	4653	4745	4763	4851	4880	4921	5121	5179	5245	5566	5587	5701	5727	5734	5744	5745	5747	6096	6205	6209	6238	6348	6422	6423	6469	6474	6497	6591	6608	6615	6657	6664	6696	7124	7171	7290	7291	7473	7477	7480	7481	8074	8313	8321	8482	8519	8626	8646	8994	9063	9087	9188	9241	9260	9464	9759	9770	9902	9970	10014	10140	10189	10399	10457	10492	10507	10514	22800	22801	23020	23051	23314	23317	23376	23462	23560	23601	25819	25842	25937	26156	27044	27316	30812	51176	51374	51430	51564	51684	51741	54361	55363	55366	55973	56975	56998	57003	57045	57665	58476	63979	64093	79697	80381	89780	90993	115908	117581	121340	169200	221044	255743	338773	340419	344901
GO:0001654	GO:EYE DEVELOPMENT	43	86	93	94	182	220	324	356	357	358	362	490	493	578	581	585	596	627	631	639	652	654	655	658	659	668	778	779	793	835	1017	1019	1028	1181	1261	1270	1282	1289	1290	1295	1296	1406	1410	1411	1412	1413	1415	1418	1419	1420	1421	1427	1471	1497	1499	1543	1545	1739	1815	1826	1969	2055	2200	2201	2202	2254	2255	2261	2263	2295	2296	2301	2303	2625	2697	2703	2737	2779	2780	2782	2792	2820	2823	2909	2916	3065	3066	3091	3150	3190	3208	3299	3549	3565	3614	3615	3624	3725	3791	3859	3913	3975	3976	3982	4040	4041	4081	4088	4094	4124	4149	4211	4212	4214	4237	4284	4286	4308	4543	4544	4617	4628	4647	4669	4693	4760	4763	4771	4810	4814	4853	4867	4901	4915	4916	5015	5076	5078	5080	5145	5146	5156	5158	5159	5176	5204	5308	5309	5316	5458	5469	5523	5584	5629	5663	5764	5797	5818	5914	5915	5916	5950	5954	5961	5979	6010	6011	6015	6094	6096	6101	6103	6121	6152	6240	6247	6256	6297	6469	6496	6497	6498	6597	6604	6656	6657	6662	6664	6667	6670	6722	6774	6909	6935	7020	7021	7040	7042	7046	7048	7050	7054	7070	7101	7111	7275	7287	7289	7291	7422	7431	7472	7474	7475	7476	7477	7482	7483	7484	7490	7528	7855	8100	8289	8312	8322	8412	8419	8829	8842	8854	9314	9355	9497	9573	9742	9839	9927	9997	10002	10210	10220	10265	10319	10320	10461	10586	10763	10765	10818	10848	11023	11081	22899	22926	22930	22931	22989	23094	23210	23287	23322	23418	23424	23554	23657	23770	24147	25794	25806	25836	25932	25945	25987	26146	27077	28514	28996	30062	30812	30813	50937	51057	51343	51384	51761	54549	54567	54806	54897	55212	55636	55714	55764	56890	57010	57030	57045	57096	57381	57822	57835	58158	58508	60436	64093	64220	64919	65979	79888	79977	80184	81029	84100	84189	84465	84678	85407	90780	91851	93986	94137	112724	114789	116039	117581	118427	121643	128637	130557	130916	146862	147912	157506	170692	204851	220202	221322	221935	246213	256297	261734	283375	284217	285331	285590	338917	340273	343035	348980	388552	388585	646960
GO:0001655	GO:UROGENITAL SYSTEM DEVELOPMENT	38	59	93	182	183	185	186	196	223	231	247	268	284	285	301	324	358	359	367	384	403	445	581	596	627	650	652	654	655	719	760	793	847	947	960	1027	1028	1063	1282	1285	1286	1396	1499	1512	1523	1588	1634	1636	1739	1909	1948	1958	2018	2028	2043	2045	2048	2049	2099	2100	2122	2138	2200	2246	2247	2253	2255	2260	2263	2288	2294	2296	2297	2302	2303	2624	2625	2650	2668	2719	2736	2737	3037	3158	3169	3190	3207	3209	3217	3227	3237	3239	3280	3371	3398	3399	3479	3480	3579	3611	3655	3675	3691	3758	3764	3911	3913	3975	3976	4038	4070	4072	4086	4087	4088	4089	4090	4091	4092	4093	4208	4311	4357	4358	4435	4609	4643	4750	4763	4811	4824	4851	4854	4868	4953	5017	5076	5087	5125	5154	5155	5156	5159	5175	5176	5228	5268	5310	5311	5314	5324	5420	5455	5471	5613	5618	5623	5629	5660	5727	5728	5800	5914	5915	5916	5950	5972	5979	6092	6256	6299	6382	6385	6422	6469	6492	6495	6523	6557	6569	6599	6608	6659	6662	6664	6715	6772	6776	6794	6928	6943	7020	7021	7040	7046	7067	7161	7248	7337	7369	7380	7422	7466	7471	7474	7475	7477	7481	7482	7484	7490	7704	7827	7849	7917	8100	8516	8549	8626	8642	8692	8710	8826	8829	8842	8854	8879	9096	9104	9231	9241	9244	9245	9350	9353	9370	9420	9500	9510	9742	9788	9863	10018	10116	10220	10247	10252	10272	10409	10413	10481	10736	10818	10972	11231	23210	23213	23322	23371	25836	25937	25976	26108	26146	26249	26508	26585	27023	27031	27130	28514	28999	30812	50484	51057	51107	51176	51196	51301	51804	54361	54475	54790	54806	55083	55366	55840	55959	56913	56998	57216	64220	64321	64412	65057	65250	65266	79084	79191	79192	79633	79727	79810	80144	80184	80310	84159	84445	84623	90410	90780	93649	116039	120892	130497	139285	153572	157506	168002	168667	170690	201163	255738	255743	342184	342372	388585	768239	100133941
GO:0001656	GO:METANEPHROS DEVELOPMENT	38	186	358	359	596	652	655	793	947	1499	1512	1958	2138	2200	2253	2255	2297	2302	2303	2625	2668	2719	2737	3207	3227	3237	3280	3398	3399	3579	3913	3975	3976	4089	4435	4609	4763	4824	5076	5154	5155	5156	5159	5310	5311	5455	5727	5979	6092	6299	6469	6495	6523	6608	6662	6772	6928	6943	7021	7369	7477	7484	7490	7827	7849	8516	9231	9353	9370	10220	10252	10409	10413	10736	25836	25937	26585	30812	51107	51804	54361	55083	55366	79191	79192	79633	80144	116039	130497	153572	157506	342184	388585
GO:0001657	GO:URETERIC BUD DEVELOPMENT	183	186	384	596	627	650	652	655	793	847	960	1499	1739	2138	2246	2247	2253	2260	2263	2296	2297	2302	2303	2625	2668	2719	2737	3207	3217	3237	3280	3611	3911	3975	4070	4072	4086	4087	4088	4089	4090	4091	4092	4093	4435	4609	5076	5087	5228	5311	5623	5727	5914	5915	5979	6092	6299	6382	6385	6422	6469	6492	6495	6608	6662	6928	6943	7040	7422	7471	7475	7481	7482	7484	7490	7849	8642	9241	9244	9350	9353	9500	10220	10252	10409	10736	26585	30812	51804	54361	55083	55366	56998	64412	79633	130497	168667	170690	255743	342184
GO:0001658	GO:BRANCHING INVOLVED IN URETERIC BUD MORPHOGENESIS	183	186	596	650	652	960	1499	1739	2138	2246	2247	2253	2297	2668	2719	2737	3207	3217	3237	3611	3911	3975	4070	4089	4435	4609	5076	5087	5228	5311	5623	5727	6299	6469	6495	6608	6662	6928	6943	7040	7422	7471	7475	7482	7484	7490	7849	8642	9241	9500	10736	26585	30812	51804	54361	55366	56998	64412	79633	170690	255743
GO:0001659	GO:TEMPERATURE HOMEOSTASIS	18	33	37	134	153	154	155	886	1149	1268	1621	1812	1813	1907	1910	2308	2876	3356	3552	3553	3557	4159	4923	5321	5733	5743	6352	6774	7124	7442	8600	8792	8862	9572	10891	50508	57561	79068	376497	729230
GO:0001662	GO:BEHAVIORAL FEAR RESPONSE	116	596	627	777	885	1392	1622	1803	1812	1815	1977	1981	2100	2558	2697	2788	2898	2904	3350	3358	4192	4204	4208	4761	4887	5179	6198	7101	7349	7416	8622	10522	23542	57679	64854	84961
GO:0001666	GO:RESPONSE TO HYPOXIA	18	81	100	101	133	134	154	158	177	191	207	210	212	218	283	285	317	329	355	358	405	430	472	481	571	572	596	624	650	655	664	665	768	817	824	834	836	847	857	863	890	891	947	952	1027	1103	1137	1139	1141	1179	1263	1365	1385	1387	1410	1471	1543	1788	1789	1803	1812	1813	1869	1889	1906	1909	1958	1978	2021	2022	2030	2033	2034	2056	2068	2071	2113	2168	2185	2277	2321	2475	2627	2782	2792	3091	3145	3162	3163	3291	3329	3383	3479	3516	3553	3654	3673	3708	3709	3741	3751	3776	3777	3778	3938	3939	3952	3990	4000	4017	4049	4088	4089	4151	4193	4194	4204	4313	4322	4323	4504	4524	4763	4775	4824	4842	4843	4851	4878	4880	4891	4899	4929	4985	5024	5034	5058	5066	5154	5155	5163	5165	5179	5228	5313	5315	5327	5328	5351	5352	5366	5371	5465	5467	5562	5579	5581	5588	5664	5728	5740	5743	5764	5837	5894	6095	6233	6261	6262	6285	6338	6347	6376	6383	6387	6422	6464	6517	6532	6546	6547	6548	6649	6714	6722	6777	6781	6839	6868	6921	6923	7009	7010	7015	7037	7040	7042	7043	7049	7054	7057	7157	7184	7200	7220	7225	7249	7291	7311	7314	7316	7321	7322	7323	7351	7352	7391	7412	7422	7428	7436	7515	7852	8453	8473	8614	8678	8994	8996	9021	9124	9361	9370	9520	9915	9978	10266	10370	10397	10449	10460	10525	10631	10869	10891	10911	11318	22933	22937	22953	23256	23409	23411	25828	25950	26355	26608	27063	27113	28984	28996	29979	29988	30001	50507	50809	51129	51142	51378	54541	54583	54890	55662	55818	56776	57085	57103	64344	64428	64506	65018	79625	79723	81575	84709	84962	90226	93649	112398	112399	114757	114990	126374	132864	139341	219736	391104	100133941
GO:0001667	GO:AMEBOIDAL-TYPE CELL MIGRATION	14	90	91	94	177	183	186	207	239	284	285	306	335	348	350	358	387	388	393	397	411	652	659	673	708	796	889	949	967	1012	1072	1235	1460	1512	1545	1634	1803	1839	1906	1908	1910	1942	1947	1948	1954	1960	1969	2013	2039	2050	2066	2113	2185	2191	2196	2241	2246	2247	2249	2252	2253	2255	2260	2303	2324	2348	2625	2637	2658	2668	2768	2822	2876	3036	3037	3091	3146	3164	3273	3315	3357	3373	3397	3458	3565	3611	3640	3670	3673	3675	3676	3688	3689	3690	3691	3695	3725	3791	3815	3849	3868	3911	4017	4041	4070	4163	4233	4254	4318	4627	4763	4838	4846	4851	4856	4902	4921	5048	5077	5155	5168	5170	5176	5216	5217	5290	5308	5335	5371	5467	5547	5578	5581	5585	5586	5587	5607	5613	5629	5646	5728	5743	5747	5781	5793	5797	5801	5872	5879	5979	6091	6239	6273	6286	6385	6387	6405	6469	6546	6608	6662	6663	6672	6678	6714	6722	6781	6862	6863	6869	6899	6997	7010	7026	7040	7042	7046	7048	7057	7076	7101	7145	7291	7422	7424	7429	7474	7476	7481	7763	7857	7869	8394	8482	8692	8742	8754	8766	8817	8823	8828	8829	8874	8879	8929	9037	9219	9270	9314	9350	9353	9464	9475	9530	9564	9647	9723	9734	9839	9965	10013	10014	10016	10163	10371	10487	10500	10501	10505	10507	10509	10512	10519	10563	10755	10787	10911	11156	11171	11235	22846	22976	23122	23129	23224	23328	23332	23380	23473	23499	23592	23603	25865	25930	25960	26585	27086	27286	27302	28984	29941	30812	51057	51157	51176	51378	51466	51564	54345	54437	54443	54566	54567	54828	54910	55333	55612	55897	55920	56413	56920	57111	57175	57449	57556	57669	57715	58495	60626	64081	64218	64321	64750	65979	79812	79899	80031	80149	83442	83881	84159	84913	90627	91862	114757	117584	130399	147372	152007	153090	154754	154796	154810	168667	199953	201161	223117	340719	374969	391104	729230	100506013
GO:0001676	GO:LONG-CHAIN FATTY ACID METABOLIC PROCESS	30	33	51	215	239	240	241	242	246	247	747	873	1374	1543	1544	1545	1548	1549	1553	1555	1557	1558	1559	1562	1565	1571	1572	1573	1579	1800	2053	2166	2180	2181	2182	2678	2687	2876	2879	3248	3295	3991	3992	4048	4051	4056	4363	4644	5066	5321	5354	5595	5730	5740	5742	5743	6342	6754	6916	8399	8529	8605	8644	8877	9261	9415	9444	9536	10005	10728	10965	10998	10999	11000	11001	11332	11343	22949	23205	23305	27306	28965	50640	51703	54898	59344	60481	64834	66002	79071	81616	83401	113612	122970	127281	158584	158833	221955	376497	641371	100137049
GO:0001678	GO:CELLULAR GLUCOSE HOMEOSTASIS	111	150	177	345	355	408	572	777	1080	1215	1361	1392	1395	1535	1581	1946	2021	2030	2044	2081	2281	2308	2335	2621	2626	2641	2645	2692	2822	2850	2852	2863	2901	3091	3098	3099	3101	3123	3125	3126	3127	3156	3170	3171	3190	3383	3479	3480	3553	3554	3651	3745	3767	3956	4041	4221	4661	4760	4830	5019	5076	5127	5165	5176	5290	5295	5296	5328	5428	5530	5532	5566	5581	5734	5798	5799	5894	5903	5906	6597	6598	6659	6717	6722	6770	6810	6934	7054	7074	7351	7412	7447	7494	7776	8111	8398	8473	8660	9024	9230	9324	9378	9572	9607	9854	9971	10399	10804	10891	22841	23054	23411	25874	25942	26056	26291	29085	50507	51085	51092	55011	55107	55638	56652	56943	57393	65985	80201	83667	91942	222546	252983	388581	415116
GO:0001696	GO:GASTRIC ACID SECRETION	886	887	1133	2863	3274	3784	4987	5020	5021	5733	6343	6446	7032	7349	7442	10874	51738	115111	389015
GO:0001701	GO:IN UTERO EMBRYONIC DEVELOPMENT	90	91	94	100	102	103	118	133	207	284	320	321	338	405	430	538	598	639	650	657	675	677	689	705	727	729	824	841	861	891	1028	1045	1046	1050	1051	1437	1499	1603	1655	1755	1825	1906	1909	1956	1999	2016	2021	2034	2068	2103	2116	2122	2186	2260	2263	2294	2296	2530	2549	2551	2623	2624	2625	2626	2627	2648	2697	2707	2709	2736	2737	2768	2885	2896	2904	3087	3091	3170	3280	3294	3297	3479	3491	3516	3549	3586	3633	3640	3676	3688	3714	3726	3856	3880	3976	3981	3993	4010	4061	4087	4088	4089	4097	4124	4154	4188	4245	4435	4436	4487	4602	4624	4627	4628	4643	4678	4683	4751	4836	4838	4846	4848	4849	4851	4853	4904	4952	5029	5116	5155	5159	5308	5310	5311	5333	5335	5460	5469	5594	5604	5702	5704	5727	5801	5890	5919	5930	5932	5954	6117	6256	6257	6426	6491	6498	6546	6598	6608	6615	6660	6663	6667	6668	6670	6692	6722	6768	6788	6789	6926	6928	6997	7014	7022	7026	7043	7046	7048	7075	7082	7157	7168	7274	7291	7319	7320	7403	7412	7422	7472	7477	7484	7516	7703	7763	7779	7784	7855	7942	8061	8085	8178	8202	8239	8312	8320	8451	8452	8521	8531	8533	8648	8812	8882	8894	8985	9021	9113	9133	9241	9353	9394	9412	9421	9464	9470	9546	9573	9646	9788	9817	9837	9869	9871	9915	9927	9997	10018	10049	10087	10155	10229	10290	10365	10454	10472	10568	10653	10672	10733	10761	10787	10959	11232	22905	22992	23028	23038	23054	23162	23168	23322	23414	23451	23462	23463	23476	23493	23760	23764	25831	25942	25949	25988	26005	26115	26173	26259	26524	27022	27077	27173	27339	27341	28982	29072	29123	29924	29985	30812	50814	51119	51176	51294	51493	51639	51763	53353	53615	54345	54475	54583	54663	54700	54815	54892	55224	55273	55553	55632	55636	55845	56949	57167	57178	57448	57493	57496	57498	57534	57623	57669	57679	57680	57820	58495	59343	60626	63925	63978	64321	79600	79621	79728	79733	79977	80312	80712	81565	83605	84072	84296	84525	84870	89780	90780	91603	113026	121599	126206	129685	130507	132625	144455	154796	157506	201163	202018	203447	285855	387733	389075	390992	441161	642623
GO:0001702	GO:GASTRULATION WITH MOUTH FORMING SECOND	90	92	93	1499	1954	2114	2626	3087	3170	3975	4040	4041	4089	4838	5015	6045	6722	6862	7358	7474	7709	8613	8646	8861	9573	10818	26011	51339	51471	154796
GO:0001704	GO:FORMATION OF PRIMARY GERM LAYER	90	652	655	657	659	1284	1289	1290	1291	1294	1295	1301	1303	1499	1843	1844	1846	1847	1848	1969	2001	2114	2116	2132	2138	2139	2260	2263	2296	2303	2335	2626	2627	3064	3170	3196	3207	3281	3624	3673	3675	3676	3678	3679	3685	3688	3689	3690	3691	3693	3909	3912	3914	3975	4086	4087	4088	4313	4317	4318	4323	4324	4771	4838	5076	5460	5573	6423	6615	6657	6722	6862	6886	6911	6928	7296	7403	7448	7473	7474	7481	8013	8091	8312	8320	8324	8516	8646	9241	9314	9421	9646	10736	22943	23135	23168	23275	23499	51176	54623	55614	55897	57045	57057	57669	57690	60412	64321	79577	79923	79971	83595	83881	84913	89780	89870	123169	286204	642658
GO:0001706	GO:ENDODERM FORMATION	1284	1289	1290	1291	1294	1295	1301	1303	1499	1843	1844	1846	1847	1848	2335	2626	2627	3281	3624	3676	3678	3679	3685	3689	3693	3909	3912	3914	3975	4087	4313	4317	4318	4323	4324	4838	5460	6657	6928	7448	8091	8320	9241	9646	22943	23168	54623	55897	57057	57690	64321	79577	79923	83595	83881	123169
GO:0001707	GO:MESODERM FORMATION	90	652	655	657	659	1969	2116	2132	2138	2139	2260	2263	2296	2303	3064	3196	3207	3624	3673	3675	3688	3690	3691	4086	4087	4088	4771	4838	5076	5573	6423	6615	6722	6862	6886	6911	7296	7403	7473	7474	7481	8013	8091	8312	8320	8516	8646	9241	9314	9421	10736	22943	23135	23275	23499	51176	55897	57045	57057	57669	60412	64321	79971	89780	89870	286204	642658
GO:0001708	GO:CELL FATE SPECIFICATION	324	429	474	657	1499	1848	2116	2128	2138	2139	2247	2260	2672	2736	2737	3110	3169	3170	3207	3209	3226	3236	3516	3549	3670	3688	4633	4821	4825	4838	4851	4916	5015	5076	5080	5449	5457	5460	5663	5664	5727	6423	6469	6495	6608	6656	6657	6662	6899	6911	6928	8022	8320	8324	8543	8643	8829	10215	10297	10660	10736	22943	23770	26011	28514	30012	50937	51684	54345	54738	55553	55897	58524	63950	63978	64321	64843	79144	79923	84504	89780	120237	145258	167826	170825	492307
GO:0001709	GO:CELL FATE DETERMINATION	182	429	474	652	998	1499	2624	2625	2627	3199	3280	3475	3670	4170	4208	4654	4821	4853	4855	4908	4909	5015	5076	5080	5396	5460	5629	5727	6909	7471	8643	9314	10660	11281	28514	55079	55897	56603	57453	64321	64641	89870	157848	343472	388585
GO:0001710	GO:MESODERMAL CELL FATE COMMITMENT	652	657	2116	2138	2139	2260	2303	3207	4086	4838	5076	6423	9314	10736	22943	55897	64321	89780	89870
GO:0001711	GO:ENDODERMAL CELL FATE COMMITMENT	1499	1848	2627	5460	6657	6928	8320	9646	22943	23168	54623	55897	64321	79577	79923	123169
GO:0001731	GO:FORMATION OF TRANSLATION PREINITIATION COMPLEX	1939	1968	3646	8562	8661	8662	8663	8664	8665	8666	8667	8668	8669	10480	23521	27335	28985	51386	90381	255308	728689
GO:0001736	GO:ESTABLISHMENT OF PLANAR POLARITY	25	27	387	998	1601	1741	1855	1856	1857	1951	1952	2239	2295	2535	4300	4919	4920	5048	5754	5879	6259	6422	6423	7074	7474	7481	7484	7976	8321	8323	8324	8626	9620	9863	9968	10082	10427	22881	23002	23322	27031	51339	54903	57216	57822	65250	80199	81839	84133	84870	85407	115908	128272	144165	166336
GO:0001738	GO:MORPHOGENESIS OF A POLARIZED EPITHELIUM	25	27	387	998	1601	1741	1855	1856	1857	1951	1952	2239	2295	2535	3911	4300	4478	4919	4920	5048	5754	5879	6259	6422	6423	6939	7074	7474	7481	7484	7976	8321	8323	8324	8626	8650	9231	9368	9620	9863	9968	10082	10427	10890	22881	23002	23322	26146	27031	51339	54806	54903	57216	57822	65250	80199	81839	84133	84870	85407	115908	128272	144165	163183	166336	284217
GO:0001754	GO:EYE PHOTORECEPTOR CELL DIFFERENTIATION	585	639	1261	1826	2779	2780	2792	3549	4308	4647	4669	4901	4915	5015	5080	5146	5523	5584	5764	6094	6096	6101	6103	6662	6774	7054	7070	7287	7422	8842	9497	10002	10210	23287	23418	25794	30812	54549	54897	57010	57096	80184	85407	112724	118427	285331	348980
GO:0001755	GO:NEURAL CREST CELL MIGRATION	90	1072	1908	1910	1947	2066	2348	2637	2668	3091	3357	3670	3911	4254	4902	5077	5308	5979	6405	6469	6608	6663	6899	7291	7869	8482	8829	8929	9037	9464	9723	9839	9965	10371	10500	10501	10505	10507	10509	10512	23603	30812	51176	54437	54910	56920	57556	57715	58495	64218	65979	80031	223117
GO:0001756	GO:SOMITOGENESIS	472	657	1044	1045	2033	2296	2303	2648	3170	3955	3975	4040	4088	4089	4222	4223	4617	4618	4824	4851	4920	5015	5075	5077	5100	5362	5523	5591	5663	5664	6422	6423	6862	6911	6939	7157	7403	7474	7516	8312	8313	8557	8601	9096	9573	9839	9968	10006	10287	10512	10655	10683	10787	22943	23242	23509	27023	28514	51176	54475	57534	57669	79728	84667	85407	89780	92129	134701	286204	343930	441478
GO:0001759	GO:ORGAN INDUCTION	650	652	1499	2246	2248	2253	2255	2260	2668	3207	3227	3237	5460	6495	7472	7482	10252	10818	22943	55897	89780
GO:0001763	GO:MORPHOGENESIS OF A BRANCHING STRUCTURE	90	133	183	186	374	473	578	581	596	639	650	652	655	780	859	960	1282	1305	1435	1499	1501	1512	1522	1605	1739	1746	1813	1906	1909	1950	1969	2022	2045	2099	2118	2119	2138	2246	2247	2252	2253	2255	2260	2263	2294	2297	2303	2637	2658	2668	2683	2719	2736	2737	2885	3082	3087	3169	3170	3190	3202	3207	3209	3217	3237	3239	3371	3479	3549	3553	3569	3586	3611	3791	3845	3911	3975	3993	4041	4070	4089	4233	4323	4435	4488	4609	4775	4776	4824	4851	4855	5058	5076	5087	5154	5228	5241	5308	5310	5311	5361	5371	5469	5499	5623	5629	5727	5829	6256	6299	6356	6387	6422	6423	6469	6474	6495	6558	6591	6608	6657	6662	6663	6688	6692	6714	6722	6768	6789	6926	6928	6943	6997	7022	7040	7048	7052	7080	7124	7421	7422	7471	7472	7474	7475	7477	7482	7484	7490	7849	7855	8202	8521	8626	8642	8829	8914	8945	9021	9037	9231	9241	9353	9500	9620	9723	10116	10252	10253	10371	10413	10481	10512	10653	10672	10736	10765	10818	11331	23129	23213	23405	25932	26585	29072	30812	51176	51804	54361	54567	54903	54922	55366	55727	56998	57057	57142	57216	57471	59277	64399	64412	64783	79633	79977	84870	120892	151449	157506	160418	170690	255743	284217	340419	441478
GO:0001764	GO:NEURON MIGRATION	323	429	460	474	558	581	585	885	886	1020	1233	1281	1499	1600	1630	1641	1812	1813	1951	1952	2011	2066	2258	2260	2534	2621	2624	2625	2676	2697	2796	2823	2932	3084	3110	3675	3975	4137	4139	4147	4208	4628	4692	4825	4897	4915	4916	4929	5048	5080	5108	5116	5191	5194	5308	5592	5649	5663	5747	5803	5828	6387	6656	6695	6722	6774	6792	6900	7025	7026	7080	7155	7291	7531	7852	7976	8239	8403	8829	8851	8929	8941	9201	9289	9423	9585	9620	9693	9856	10371	10439	10718	10752	10806	11023	11104	23284	23314	23380	23654	23768	26012	26468	27185	30012	51473	54328	54541	54820	54986	55079	55140	56751	57057	57556	57688	57698	58158	63973	64221	79625	81565	83482	84197	84623	84892	85451	85508	89796	92737	137970	153090	161582	167826	170302	200933	259266	266727	343472	347733	389549	644168	653464
GO:0001773	GO:MYELOID DENDRITIC CELL ACTIVATION	814	914	942	951	1437	1794	2323	3146	3516	3565	3586	3662	4055	4853	5663	5971	6504	6688	7040	7048	7189	8744	10077	10202	10537	10538	22914	29108	55509	81501	84868	116071	100528032
GO:0001776	GO:LEUKOCYTE HOMEOSTASIS	25	100	207	301	355	578	581	596	608	778	836	972	1831	2122	2207	2322	3071	3091	3146	3458	3551	3558	3559	3569	3579	3707	3718	3965	4004	4067	4208	4254	4282	4522	5027	5142	5293	5366	5532	5585	5896	6498	6654	6655	6708	6776	6777	6868	7040	7042	7128	8456	8517	8740	8772	8915	9093	9133	9469	10018	10572	10673	11035	11151	23495	27040	29985	30061	50943	54542	55012	57678	57864	83700	84524	84636	115650	124976	149041	159296	202309	338442
GO:0001779	GO:NATURAL KILLER CELL DIFFERENTIATION	558	2323	2621	3398	3600	5293	6670	6776	6777	6929	7301	8993	10125	10320	10461	11334	22890	25831	57115	59067	114770	114771	257101
GO:0001782	GO:B CELL HOMEOSTASIS	25	100	578	581	596	836	972	3071	3091	3551	4067	4208	4282	5293	5585	6654	6655	7128	8517	8915	10018	10673	23495	50943	54542	55012	115650	124976	149041	202309
GO:0001783	GO:B CELL APOPTOTIC PROCESS	100	578	581	604	695	972	3558	3586	4067	4282	5585	5728	8660	8915	9212	10018	10758	26155	27086	27242	57181	84941	96459
GO:0001816	GO:CYTOKINE PRODUCTION	19	25	27	54	101	116	136	150	177	183	186	247	284	301	307	329	330	335	336	347	405	408	409	468	554	558	566	567	602	604	661	671	672	684	695	706	708	718	719	727	728	796	820	834	838	861	864	914	916	920	923	929	940	941	942	943	947	948	958	959	965	972	1001	1051	1053	1054	1113	1116	1139	1147	1149	1178	1191	1215	1236	1240	1385	1386	1387	1395	1401	1411	1432	1436	1437	1445	1499	1535	1540	1545	1604	1621	1649	1654	1660	1739	1813	1903	1991	1997	2033	2069	2149	2150	2167	2192	2205	2207	2219	2268	2277	2302	2324	2335	2532	2547	2621	2625	2626	2627	2629	2633	2658	2693	2833	2865	2867	2950	3066	3071	3077	3091	3105	3106	3113	3115	3123	3125	3126	3127	3133	3135	3140	3146	3148	3162	3297	3303	3304	3315	3329	3357	3394	3428	3440	3454	3456	3458	3516	3551	3552	3553	3556	3558	3565	3566	3568	3569	3570	3572	3578	3586	3592	3593	3594	3595	3596	3600	3604	3605	3606	3620	3623	3624	3625	3630	3635	3654	3659	3661	3662	3663	3665	3670	3702	3717	3718	3815	3902	3929	3937	3952	3965	3988	4023	4049	4050	4054	4057	4060	4063	4067	4088	4089	4094	4157	4179	4210	4233	4282	4352	4361	4615	4691	4773	4776	4790	4791	4792	4793	4795	4838	4843	4851	4853	4860	5004	5027	5029	5045	5047	5054	5074	5094	5125	5142	5144	5187	5196	5293	5294	5295	5300	5319	5336	5345	5371	5434	5435	5437	5440	5441	5443	5495	5552	5553	5580	5588	5590	5591	5600	5601	5603	5606	5607	5610	5621	5724	5734	5743	5861	5879	5914	5966	5970	5971	5987	6095	6233	6279	6280	6283	6284	6288	6347	6348	6351	6363	6364	6375	6376	6397	6441	6504	6556	6591	6647	6693	6711	6714	6737	6776	6777	6778	6850	6868	6885	7010	7040	7042	7043	7057	7072	7096	7097	7098	7099	7100	7105	7110	7124	7128	7186	7187	7189	7291	7292	7293	7294	7311	7314	7316	7318	7323	7349	7356	7430	7474	7481	7494	7520	7538	7706	7784	7855	8013	8288	8320	8482	8517	8651	8692	8710	8737	8744	8764	8767	8772	8808	8809	8826	8832	8877	8887	8915	8986	8993	9111	9140	9173	9181	9208	9246	9252	9261	9289	9308	9314	9370	9447	9451	9466	9474	9508	9516	9533	9636	9641	9698	9865	9971	10125	10148	10159	10204	10211	10216	10288	10293	10333	10365	10379	10385	10392	10394	10417	10457	10464	10475	10524	10538	10554	10555	10564	10621	10622	10623	10626	10631	10642	10643	10644	10666	10725	10855	10859	10892	11035	11118	11119	11128	11146	11148	11213	11277	11315	11326	11334	22861	22900	22914	22925	22954	23139	23180	23213	23220	23236	23369	23586	23601	23607	23643	23705	23765	24145	25816	25865	26007	26057	26065	26137	26146	26191	26253	26287	26525	27033	27035	27086	27159	27177	27179	27190	27202	27242	27297	27342	28514	28951	28984	29108	29110	29126	29923	29949	30968	50848	50943	51082	51135	51157	51176	51191	51284	51311	51428	51465	51561	51564	51665	51704	51728	51738	51744	53347	53833	54106	54206	54210	54440	54476	54795	54941	55024	55122	55366	55540	55593	55601	55655	55703	55718	55773	55801	55829	55870	55914	55959	56253	56300	56829	56957	57115	57162	57336	57447	57493	57506	57678	58484	58509	59067	59272	59307	64115	64127	64135	64170	64343	64806	66005	79004	79065	79132	79400	79589	79594	79671	79679	79792	80149	80380	80381	80762	81030	81793	81844	81929	83737	84166	84265	84282	84433	84632	84818	84868	84901	89780	89832	89870	90865	91543	91662	93978	112744	114548	114609	114770	114771	114836	114899	115004	115362	115650	117581	117854	126259	127544	133396	140706	146206	147372	147945	148022	149233	150372	152138	161882	163486	170506	171568	192683	197358	201633	246778	260434	282618	283420	284297	338322	338382	338557	340061	353376	377630	541468	729230	730249	100133941	100431172	100528032
GO:0001817	GO:REGULATION OF CYTOKINE PRODUCTION	25	27	54	101	116	136	150	177	183	186	247	284	301	307	329	330	335	336	347	405	408	409	468	558	566	567	602	604	661	671	672	684	695	706	708	718	719	727	728	796	820	834	838	861	914	916	920	923	929	940	941	942	943	947	948	958	959	965	972	1001	1051	1054	1139	1147	1149	1178	1191	1236	1240	1385	1386	1387	1395	1401	1411	1432	1436	1437	1445	1499	1535	1540	1545	1649	1654	1660	1813	1903	1991	1997	2033	2069	2149	2150	2192	2205	2207	2219	2268	2277	2302	2324	2335	2532	2547	2621	2625	2626	2627	2629	2633	2658	2693	2865	2867	2950	3066	3071	3077	3091	3105	3106	3113	3115	3123	3125	3126	3127	3133	3135	3146	3148	3162	3297	3303	3304	3315	3329	3357	3394	3428	3440	3454	3456	3458	3551	3552	3553	3558	3565	3566	3568	3569	3570	3572	3578	3586	3592	3593	3594	3595	3596	3600	3604	3605	3606	3620	3623	3624	3625	3630	3635	3654	3659	3661	3662	3663	3665	3670	3717	3718	3902	3929	3952	3965	4023	4049	4050	4057	4060	4063	4067	4088	4089	4157	4179	4210	4233	4282	4352	4361	4615	4691	4776	4790	4791	4792	4793	4795	4838	4843	5004	5027	5029	5045	5047	5054	5094	5142	5144	5187	5196	5295	5300	5336	5345	5371	5434	5435	5437	5440	5441	5443	5495	5552	5553	5588	5590	5591	5600	5601	5603	5606	5607	5610	5621	5724	5734	5743	5879	5914	5966	5970	5971	5987	6095	6233	6288	6347	6348	6351	6363	6364	6375	6376	6397	6441	6504	6556	6591	6647	6693	6711	6714	6737	6776	6777	6778	6850	6868	6885	7010	7040	7042	7043	7057	7072	7096	7097	7098	7099	7100	7105	7110	7124	7128	7186	7187	7189	7291	7292	7293	7294	7311	7314	7316	7318	7323	7349	7356	7430	7474	7481	7494	7520	7538	7706	7784	7855	8013	8288	8482	8517	8651	8692	8710	8737	8744	8764	8767	8772	8808	8809	8826	8832	8877	8887	8915	8986	8993	9111	9140	9173	9181	9208	9246	9252	9261	9308	9314	9370	9447	9451	9466	9474	9516	9533	9636	9641	9698	9865	9971	10125	10148	10159	10204	10211	10216	10288	10293	10333	10365	10385	10392	10394	10417	10457	10464	10475	10524	10554	10555	10564	10621	10622	10623	10626	10631	10642	10643	10644	10855	10859	10892	11035	11128	11146	11148	11213	11277	11315	11326	11334	22861	22900	22914	22954	23139	23213	23220	23236	23369	23586	23601	23607	23643	23705	23765	24145	25865	26007	26057	26065	26137	26146	26191	26253	26287	26525	27033	27035	27086	27159	27177	27179	27190	27202	27242	27297	27342	28514	28951	28984	29108	29110	29126	29923	50848	50943	51082	51157	51176	51191	51284	51311	51428	51465	51561	51564	51665	51704	51728	51738	51744	53347	53833	54106	54206	54440	54476	54795	54941	55024	55122	55366	55540	55593	55601	55655	55703	55718	55773	55801	55829	55914	55959	56253	56300	56829	56957	57115	57162	57336	57447	57493	57506	57678	58509	59067	59272	59307	64115	64127	64135	64170	66005	79004	79065	79132	79589	79594	79671	79679	79792	80149	80380	80381	80762	81030	81793	81844	83737	84166	84265	84282	84433	84632	84818	84868	89780	89832	89870	90865	91543	91662	93978	112744	114548	114609	114770	114771	114836	114899	115004	115362	115650	117581	117854	126259	140706	146206	147372	147945	148022	149233	150372	152138	161882	170506	171568	192683	197358	201633	246778	260434	282618	283420	284297	338322	338382	338557	340061	353376	377630	541468	729230	730249	100133941	100528032
GO:0001818	GO:NEGATIVE REGULATION OF CYTOKINE PRODUCTION	54	177	284	301	307	335	336	347	408	409	558	602	604	671	684	695	706	708	947	1001	1139	1149	1240	1411	1445	1540	1991	2150	2192	2302	2335	2621	2625	2627	2629	2633	2693	2950	3071	3077	3123	3125	3126	3127	3146	3162	3297	3440	3456	3458	3569	3570	3586	3592	3593	3596	3604	3620	3623	3624	3625	3635	3661	3718	3902	3929	3965	4057	4157	4210	4233	4790	4795	5004	5045	5094	5300	5371	5443	5495	5552	5553	5607	5621	5734	5879	5914	5966	5971	5987	6233	6375	6376	6441	6504	6556	7040	7042	7043	7057	7072	7097	7099	7124	7128	7187	7291	7292	7293	7311	7314	7316	7318	7323	7356	7430	7481	7706	8288	8832	8887	8986	8993	9111	9140	9173	9246	9252	9308	9314	9370	9474	9636	9641	9971	10204	10216	10293	10365	10385	10457	10464	10524	10859	11213	11326	11334	23586	23607	26146	26191	26525	27202	27242	27342	28514	28951	28984	29108	29110	29126	50943	51176	51191	51561	51564	51665	51738	53833	54106	54206	54476	54941	55024	55366	55593	55829	55914	56957	57115	57447	57506	58509	59307	64115	64127	64135	66005	79004	79065	79132	79589	79594	79671	80149	80380	80381	80762	83737	84166	84282	84868	89832	90865	91662	114548	114770	114771	114899	117581	149233	152138	161882	197358	201633	282618	284297	338557	353376	730249	100133941
GO:0001819	GO:POSITIVE REGULATION OF CYTOKINE PRODUCTION	25	27	101	116	136	150	177	183	186	247	301	329	330	336	405	468	566	567	602	661	672	708	718	719	727	728	796	820	834	838	861	914	916	920	923	929	940	941	942	943	947	948	958	959	965	972	1051	1054	1147	1191	1236	1385	1386	1387	1395	1432	1436	1437	1499	1535	1545	1649	1654	1660	1813	1991	2033	2069	2149	2150	2205	2207	2219	2268	2277	2324	2547	2625	2626	2658	2865	2867	3066	3091	3105	3113	3115	3133	3135	3146	3148	3162	3303	3304	3315	3329	3357	3394	3428	3454	3458	3551	3552	3553	3558	3565	3566	3569	3570	3572	3578	3586	3592	3593	3594	3595	3596	3600	3605	3606	3620	3630	3654	3659	3661	3662	3663	3665	3670	3717	3929	3952	3965	4023	4049	4050	4060	4063	4088	4179	4282	4361	4615	4691	4776	4790	4791	4792	4793	4838	5027	5029	5047	5054	5142	5144	5196	5295	5336	5345	5434	5435	5437	5440	5441	5553	5588	5590	5591	5600	5601	5603	5610	5724	5734	5743	5914	5966	5970	6095	6233	6288	6347	6348	6351	6363	6364	6375	6376	6397	6556	6647	6693	6711	6714	6737	6776	6777	6778	6850	6868	6885	7010	7040	7057	7096	7097	7098	7099	7100	7105	7110	7124	7186	7189	7291	7292	7294	7311	7314	7316	7349	7474	7481	7494	7520	7784	7855	8013	8288	8482	8517	8692	8710	8737	8744	8764	8767	8772	8808	8809	8915	9173	9181	9208	9261	9308	9370	9447	9451	9466	9533	9698	10125	10148	10159	10211	10288	10333	10392	10394	10417	10464	10554	10555	10564	10621	10622	10623	10626	10631	10855	10892	11035	11128	11146	11148	11277	11315	11334	22861	22900	22914	22954	23213	23220	23236	23369	23586	23601	23643	23705	23765	24145	25865	26007	26057	26065	26137	26191	26253	27035	27159	27177	27179	27190	27297	28984	29108	29110	29126	29923	50943	51082	51157	51284	51311	51428	51561	51704	51728	51744	53833	54106	54440	55122	55540	55601	55655	55703	55718	55773	55801	55959	56253	56300	56829	57162	57493	57506	59067	64127	64135	64170	79132	79671	79679	79792	80381	81030	81844	84265	84282	84433	84632	84818	84868	89780	89870	90865	91543	91662	93978	112744	114548	114609	114836	114899	115004	115362	115650	117854	126259	140706	146206	147372	147945	148022	149233	150372	161882	170506	171568	192683	201633	246778	260434	282618	283420	338322	338382	340061	353376	377630	541468	729230	100528032
GO:0001822	GO:KIDNEY DEVELOPMENT	38	59	93	182	183	185	186	223	231	284	285	324	358	359	384	403	445	581	596	627	650	652	654	655	719	760	793	847	947	960	1028	1063	1285	1286	1499	1512	1523	1634	1636	1739	1909	1948	1958	2028	2043	2045	2138	2200	2246	2247	2253	2255	2260	2263	2296	2297	2302	2303	2625	2650	2668	2719	2736	2737	3037	3158	3190	3207	3217	3227	3237	3280	3398	3399	3579	3611	3675	3758	3764	3911	3913	3975	3976	4038	4070	4072	4086	4087	4088	4089	4090	4091	4092	4093	4208	4311	4357	4358	4435	4609	4643	4750	4763	4811	4824	4851	4854	4868	4953	5017	5076	5087	5125	5154	5155	5156	5159	5175	5176	5228	5310	5311	5314	5420	5455	5471	5613	5623	5629	5727	5800	5914	5915	5972	5979	6092	6299	6382	6385	6422	6469	6492	6495	6523	6557	6569	6608	6659	6662	6664	6772	6928	6943	7020	7021	7040	7046	7067	7161	7248	7369	7380	7422	7466	7471	7475	7477	7481	7482	7484	7490	7704	7827	7849	7917	8100	8516	8642	8692	8710	8826	8829	8842	8854	8879	9104	9231	9241	9244	9245	9350	9353	9370	9500	9510	9788	9863	10018	10220	10247	10252	10272	10409	10413	10736	10972	23210	23213	23322	23371	25836	25937	25976	26108	26146	26249	26508	26585	27031	27130	28514	28999	30812	50484	51057	51107	51176	51196	51301	51804	54361	54475	54790	54806	55083	55366	55959	56913	56998	57216	64220	64412	65250	65266	79191	79192	79633	79727	79810	80144	80184	80310	84159	84445	84623	90410	90780	116039	120892	130497	139285	153572	157506	168002	168667	170690	201163	255738	255743	342184	342372	388585	100133941
GO:0001823	GO:MESONEPHROS DEVELOPMENT	183	186	384	596	627	650	652	655	793	847	960	1499	1739	2138	2246	2247	2253	2255	2260	2263	2296	2297	2302	2303	2625	2668	2719	2737	3207	3217	3237	3280	3611	3911	3975	4070	4072	4086	4087	4088	4089	4090	4091	4092	4093	4435	4609	5076	5087	5228	5310	5311	5623	5727	5914	5915	5972	5979	6092	6299	6382	6385	6422	6469	6492	6495	6608	6662	6928	6943	7040	7422	7471	7475	7481	7482	7484	7490	7704	7849	8642	9241	9244	9350	9353	9500	10220	10252	10409	10736	26585	30812	51804	54361	55083	55366	56998	64412	79633	116039	130497	168667	170690	255743	342184
GO:0001824	GO:BLASTOCYST DEVELOPMENT	100	675	705	824	1045	1603	1755	1999	2103	2116	2896	3479	3726	4678	4683	4751	4838	4848	4849	5460	5702	5704	5890	5932	6498	6598	6667	6670	6722	6928	7022	7046	7082	7784	8320	8452	8882	9113	9412	9421	9646	9837	9869	9927	23168	23451	23476	26173	26524	27022	27339	27341	51119	51639	54475	54663	54892	55632	56949	57167	57820	63978	64321	79728	80312	81565	84072	84296	84525	91603	121599	129685	285855	642623
GO:0001825	GO:BLASTOCYST FORMATION	100	705	1045	2103	3726	4838	4848	4849	6498	6667	6670	6722	6928	7022	7082	7784	8320	8452	9113	9421	9646	9927	23451	26524	27022	27341	51639	54475	54663	57820	63978	64321	80312	84525	285855
GO:0001829	GO:TROPHECTODERMAL CELL DIFFERENTIATION	100	705	1045	2103	3726	4838	4848	4849	6667	6670	6722	7022	8320	8452	9421	9646	27022	84525
GO:0001832	GO:BLASTOCYST GROWTH	675	1755	2103	3479	4683	5890	8882	9646	9837	9869	23168	23476	26173	27339	51119	54892	57167	79728	81565	84296	91603	129685	642623
GO:0001836	GO:RELEASE OF CYTOCHROME C FROM MITOCHONDRIA	207	409	538	551	572	578	581	596	597	598	637	638	664	885	1191	2395	2537	2810	2852	2876	3082	3479	3725	4000	4318	4976	5071	5329	5366	5601	5716	6648	7157	8398	8739	8743	8996	9141	10018	10059	10105	10962	26355	27113	27141	27166	29108	51024	51499	55486	56947	64112	65018	79017	84334	90427	92609	400410
GO:0001837	GO:EPITHELIAL TO MESENCHYMAL TRANSITION	177	265	650	653	655	753	1277	1499	1601	1605	1942	2042	2078	2146	2253	2263	2295	2316	2651	2932	3037	3066	3082	3091	3169	3170	3182	3249	3516	4017	4040	4087	4088	4089	4092	4487	4488	4851	5515	6275	6317	6386	6422	6423	6591	6615	6662	6910	7040	7041	7042	7043	7046	7048	7049	7080	7291	7472	7474	7478	7481	8091	8092	8313	8320	8751	9241	9820	10155	10439	10459	11171	23122	23187	23275	23332	23462	23493	25805	25937	26508	26585	28984	51176	51384	54361	54949	55223	55273	57142	57669	58495	64081	80139	80199	80237	81610	84695	90102	114990	145258	147906	152007	153090	283149	286204	348262	359845
GO:0001838	GO:EMBRYONIC EPITHELIAL TUBE FORMATION	133	317	585	652	841	1072	1499	1855	1856	1857	2348	2535	2625	2648	2668	2909	3091	4040	4522	4838	4976	5076	5077	5216	5567	5727	5754	5898	5914	5916	5979	6299	6385	6422	6423	6491	6495	6497	6659	6662	6664	6692	6768	6788	6789	6862	6885	6928	7050	7189	7248	7249	7289	7291	7403	7408	7474	7475	7484	7546	7798	7849	7976	8092	8289	8321	8323	8463	8543	8915	9241	9355	9421	9585	9620	9839	9968	10229	10395	10427	10522	10653	10787	11019	11146	22992	23242	23513	23654	25831	25902	26160	26585	27031	29072	30812	51098	51684	51715	51804	54361	54815	54903	54910	55081	55740	55764	57167	57216	57534	57619	57822	58495	65979	79191	79192	79600	79977	80199	84678	115908	130497	131405	144165	151449	153572	253430	388585
GO:0001841	GO:NEURAL TUBE FORMATION	133	317	585	652	841	1072	1855	1856	1857	2348	2535	2648	2909	3091	4040	4522	4838	4976	5076	5077	5216	5567	5727	5754	5898	5914	5916	6299	6385	6422	6423	6491	6497	6659	6664	6692	6768	6788	6789	6862	6885	7050	7189	7248	7249	7289	7291	7403	7408	7474	7546	7798	7976	8092	8289	8321	8323	8463	8543	8915	9241	9355	9585	9620	9839	9968	10229	10395	10427	10522	10653	10787	11019	11146	22992	23242	23513	23654	25831	25902	26160	27031	29072	51098	51684	51715	54815	54903	54910	55081	55740	55764	57167	57216	57534	57619	57822	58495	65979	79600	79977	80199	84678	115908	131405	144165	151449	253430
GO:0001843	GO:NEURAL TUBE CLOSURE	133	317	585	652	1855	1856	1857	2348	2535	2648	2909	4040	4522	4976	5076	5077	5216	5567	5727	5754	5898	5914	5916	6299	6385	6422	6423	6491	6497	6692	6768	6862	7050	7189	7248	7249	7289	7291	7403	7408	7474	7546	7976	8092	8289	8321	8323	8463	8543	8915	9241	9355	9585	9620	9839	9968	10395	10427	10522	10653	10787	11019	11146	22992	23242	23513	23654	25831	25902	26160	27031	29072	51684	51715	54815	54903	54910	55081	55740	55764	57167	57216	57619	57822	65979	79977	80199	84678	115908	131405	144165
GO:0001844	GO:PROTEIN INSERTION INTO MITOCHONDRIAL MEMBRANE INVOLVED IN APOPTOTIC SIGNALING PATHWAY	207	572	581	596	637	841	1869	2810	3002	4836	5366	5533	5534	5599	7027	7157	7529	7531	7532	7533	7534	8655	10018	10971	27113	64112	90427	140735
GO:0001881	GO:RECEPTOR RECYCLING	43	819	1889	4905	5663	6622	9230	9341	10133	10268	10564	11149	22853	23513	27065	50852	51510	55004	55435	55614	57679	116985	125058	144717	150368	255738	387849
GO:0001885	GO:ENDOTHELIAL CELL DEVELOPMENT	183	1003	1499	1903	2022	2150	2876	2889	2947	3209	3383	3397	3551	3553	4233	4301	4478	4855	5138	5144	5624	5802	5906	5908	5962	6093	6781	7082	7122	7124	7132	7430	7476	7477	7716	8985	9294	9414	9475	9693	10411	11061	25932	26051	26084	50848	54345	57493	57826	60484	64102	80781	83605	91663	153562
GO:0001887	GO:SELENIUM COMPOUND METABOLIC PROCESS	191	875	1491	1615	2058	2197	2936	3176	3376	3735	3921	4141	4143	4736	4837	5859	5917	6122	6123	6124	6125	6128	6129	6130	6132	6133	6134	6135	6136	6137	6138	6139	6141	6142	6143	6144	6146	6147	6152	6154	6155	6156	6157	6158	6159	6160	6161	6164	6165	6167	6168	6169	6170	6171	6173	6175	6176	6181	6187	6188	6189	6191	6192	6193	6194	6201	6202	6203	6204	6205	6206	6207	6208	6209	6210	6217	6218	6222	6223	6224	6227	6228	6229	6230	6231	6232	6233	6234	6235	6301	6414	7296	7311	7965	9045	9060	9061	9255	9349	9521	9775	9817	11185	11224	22928	23521	25873	27232	51091	51121	51520	51540	60678	79048	118672
GO:0001889	GO:LIVER DEVELOPMENT	38	100	154	174	204	205	223	229	301	355	382	383	440	445	570	595	622	652	790	831	861	898	1050	1051	1054	1356	1361	1373	1499	1543	1628	2243	2305	2356	2487	2627	3077	3082	3087	3142	3155	3157	3158	3175	3184	3190	3249	3280	3458	3482	3651	3673	3720	3725	3818	3929	3990	4088	4124	4233	4288	4357	4691	4763	4838	4851	4853	4922	5009	5253	5290	5310	5311	5315	5328	5451	5469	5629	5698	5764	5774	5860	5906	5914	5970	6195	6256	6430	6662	6667	6670	6715	6777	6928	7049	7067	7083	7128	7351	7389	7450	7471	7494	7547	7919	8100	8452	8854	9104	9480	9821	10370	10411	10419	10533	11231	23242	23322	23463	25807	26019	26257	27031	51599	54361	54658	54790	55036	55294	55679	55897	57496	64841	65985	79733	79810	84159	123872	144455	255738	339829
GO:0001890	GO:PLACENTA DEVELOPMENT	100	133	207	283	329	405	430	639	659	677	682	841	899	1028	1045	1046	1050	1051	1432	1437	1508	1515	1594	1634	1747	1956	2034	2057	2099	2116	2186	2263	2549	2624	2693	2706	2707	2709	2885	3091	3280	3294	3297	3326	3491	3516	3586	3676	3696	3726	3856	3880	3952	3976	3993	4158	4188	4216	4221	4233	4435	4693	4838	4853	5054	5155	5310	5311	5321	5333	5467	5468	5469	5594	5604	5654	5740	5743	5747	6256	6257	6546	6615	6647	6667	6670	6692	6696	6768	6781	6788	6789	7026	7262	7274	7412	7421	7450	7472	7477	7855	7942	8022	8061	8202	8289	8320	8521	8614	8648	9021	9191	9394	9421	9820	10049	10155	10653	10733	10761	10935	10959	23054	23462	23493	25831	26259	26528	27022	29072	50814	51176	51294	51493	51738	54583	55193	55224	56977	57448	57623	58495	59343	64783	79733	79977	80712	84870	89884	113026	144455	203447
GO:0001892	GO:EMBRYONIC PLACENTA DEVELOPMENT	133	207	405	430	639	677	841	1028	1045	1046	1050	1051	1437	1956	2034	2186	2263	2549	2624	2709	2885	3091	3280	3297	3491	3516	3586	3676	3726	3856	3880	3976	3993	4188	4435	4838	5155	5310	5311	5333	5469	5594	5604	6546	6615	6667	6670	6692	6768	6788	6789	7026	7274	7412	7472	7477	7855	7942	8202	8320	8521	8648	9021	9394	9421	10049	10155	10653	10733	10761	10959	23054	23462	23493	25831	26259	27022	29072	50814	51176	51294	54583	57448	57623	58495	59343	79733	79977	80712	84870	113026	144455	203447
GO:0001893	GO:MATERNAL PLACENTA DEVELOPMENT	207	639	659	682	1508	1515	1594	2057	2099	2693	2706	3726	3976	4221	4838	5321	5467	5740	5743	6256	6257	6696	6781	7026	7421	8614	9191	10935	10959	26528	51738	56977
GO:0001894	GO:TISSUE HOMEOSTASIS	12	24	31	54	60	71	101	118	154	213	231	537	563	567	580	581	582	583	585	596	632	760	796	924	947	952	1001	1182	1200	1258	1280	1297	1435	1436	1445	1472	1490	1499	1512	1513	1525	1901	2034	2055	2074	2149	2185	2252	2271	2296	2322	2488	2624	2651	2778	3209	3315	3375	3493	3494	3502	3512	3514	3549	3574	3635	3688	3690	3758	3791	3845	3848	3933	3988	4057	4069	4117	4130	4160	4297	4583	4585	4586	4588	4760	4763	4982	5025	5027	5052	5145	5159	5166	5284	5304	5321	5734	5741	5744	5745	5781	5879	5880	5881	5950	6010	6101	6117	6121	6441	6584	6608	6647	6662	6696	6714	6722	6794	6850	7018	7031	7037	7099	7128	7189	7275	7287	7373	7399	7401	7422	7879	8029	8195	8600	8842	8861	9079	9290	9455	9456	9476	9545	9607	9657	9696	10083	10518	11151	11171	11272	22954	23154	23746	25824	25861	26058	26154	27031	29123	50507	51052	51542	53832	53833	54106	54360	54440	54903	55812	56154	56667	57817	58476	58503	63978	64072	64078	64081	64127	65217	79705	79738	79888	80184	81501	84059	84959	91603	92211	94137	115861	124220	124590	128338	128866	133522	134430	145226	158046	166379	167691	169200	171392	221395	261734	282809	284266	317719	340547	387597	387715	445582	642658	653269	653781	728378
GO:0001895	GO:RETINA HOMEOSTASIS	24	60	71	213	563	567	582	583	585	1001	1182	1258	1472	2055	2074	3315	3493	3494	3502	3512	3514	3848	3933	4057	4069	4117	4130	5052	5145	5284	5304	6010	6101	6121	6647	7018	7275	7287	7399	7401	8195	8842	9657	9696	10083	10518	11272	23746	25861	27031	55812	58503	64072	64078	65217	79738	80184	84059	92211	94137	115861	124220	124590	128338	134430	145226	158046	166379	167691	261734	282809	387715	445582	653269	653781	728378
GO:0001906	GO:CELL KILLING	164	177	213	409	566	567	572	735	820	1054	1075	1113	1130	1511	1512	1667	1668	1669	1670	1671	1991	2013	2150	2208	3002	3105	3106	3133	3346	3347	3383	3458	3481	3565	3575	3592	3593	3594	3596	3811	3902	3916	3952	3965	4068	4153	4277	4843	5027	5052	5272	5532	5777	5788	5817	5819	5873	6283	6318	6347	6375	6776	6777	6813	6845	6890	7409	8417	8542	8676	8772	9437	10018	10125	10383	10578	10666	10859	11035	11151	11334	22914	23705	26228	51561	54210	56253	57817	57823	59067	79465	80328	80329	114836	117159	127544	135250	146850	149233	154064	201294	203068	259197	353091	387836	653361	728358	729230	100431172	100507436	100528032
GO:0001909	GO:LEUKOCYTE MEDIATED CYTOTOXICITY	164	177	409	566	567	1054	1075	1130	1511	1512	1991	2013	2150	3002	3105	3106	3133	3383	3481	3575	3592	3593	3594	3811	3902	3916	3952	3965	4068	4277	4843	5027	5052	5272	5532	5777	5788	5817	5819	5873	6318	6347	6375	6776	6777	6813	6845	6890	7409	8417	8676	8772	9437	10125	10383	10666	10859	11035	11151	11334	22914	23705	26228	51561	54210	56253	57823	59067	79465	80328	80329	114836	127544	135250	146850	149233	154064	201294	203068	259197	353091	387836	653361	100431172	100507436	100528032
GO:0001910	GO:REGULATION OF LEUKOCYTE MEDIATED CYTOTOXICITY	164	177	409	567	2150	3105	3106	3133	3383	3481	3575	3592	3593	3594	3902	3916	3952	3965	4068	4843	5027	5272	5532	5788	5817	5819	6318	6347	6375	6776	6777	6890	7409	8417	8772	9437	10125	10666	10859	11035	22914	23705	26228	51561	56253	59067	114836	146850	149233	259197	100507436	100528032
GO:0001912	GO:POSITIVE REGULATION OF LEUKOCYTE MEDIATED CYTOTOXICITY	164	567	2150	3105	3106	3133	3592	3593	3594	3902	3916	4068	4843	5027	5817	5819	6347	6375	6776	6777	7409	8417	8772	10125	10666	22914	23705	26228	51561	56253	59067	114836	149233	259197	100528032
GO:0001913	GO:T CELL MEDIATED CYTOTOXICITY	177	567	1075	1512	2013	3002	3105	3106	3133	3575	3592	3593	3594	4277	5027	5532	5788	5817	5819	5873	6375	8417	8676	8772	10859	11035	51561	135250	149233	259197	100507436
GO:0001914	GO:REGULATION OF T CELL MEDIATED CYTOTOXICITY	177	567	3105	3106	3133	3575	3592	3593	3594	5027	5532	5788	5817	5819	6375	8417	8772	10859	11035	51561	149233	259197
GO:0001916	GO:POSITIVE REGULATION OF T CELL MEDIATED CYTOTOXICITY	567	3105	3106	3133	3592	3593	3594	5027	5817	5819	6375	8417	8772	51561	149233	259197
GO:0001919	GO:REGULATION OF RECEPTOR RECYCLING	43	1889	4905	5663	6622	9341	10133	10268	11149	23513	27065	50852	51510	55004	55435	55614	116985	125058	255738
GO:0001933	GO:NEGATIVE REGULATION OF PROTEIN PHOSPHORYLATION	25	103	104	177	207	259	284	324	348	408	467	578	581	623	624	633	652	655	753	801	805	808	836	857	859	891	1026	1027	1028	1029	1030	1031	1032	1050	1101	1154	1411	1445	1605	1634	1647	1739	1756	1812	1843	1844	1845	1846	1847	1848	1849	1850	1852	1855	2022	2039	2041	2122	2150	2167	2192	2218	2280	2305	2308	2475	2629	2633	2675	2764	2776	2810	2811	2852	2873	2874	2889	2932	2950	3087	3156	3172	3301	3315	3476	3479	3480	3486	3553	3558	3569	3611	3642	3643	3725	3976	4040	4041	4067	4088	4091	4092	4142	4221	4298	4609	4616	4690	4745	4763	4771	4869	4908	4916	5027	5048	5062	5071	5080	5121	5144	5167	5170	5187	5245	5300	5347	5470	5502	5515	5518	5536	5569	5570	5573	5575	5576	5577	5578	5580	5585	5590	5591	5598	5611	5621	5663	5664	5716	5728	5753	5770	5771	5777	5788	5795	5801	5925	5987	5997	5998	5999	6317	6422	6423	6609	6622	6653	6690	6879	6895	7023	7026	7040	7070	7099	7128	7161	7249	7291	7320	7345	7430	7498	7532	8440	8452	8473	8613	8651	8692	8835	8841	8850	9021	9052	9093	9104	9113	9241	9270	9306	9314	9353	9368	9370	9467	9479	9535	9555	9611	9647	9655	9770	9961	10048	10106	10114	10217	10221	10252	10253	10318	10399	10464	10507	10519	10614	10636	10771	10808	10891	10912	11065	11072	11116	11142	11171	11213	11221	11261	11314	11315	11329	22843	22863	22876	22933	22943	23171	23411	23435	23603	23624	23645	23767	23768	23769	25793	25937	25998	26146	26191	26524	26585	26973	27124	27250	27330	27342	27347	28951	29108	30837	50855	51085	51231	51339	51347	51374	51422	51562	51654	51763	54206	54431	54541	54829	54900	54920	54997	55022	55243	55333	55364	55450	55861	55870	55872	55885	56288	56937	56940	57408	57447	57689	57732	57761	58190	58509	58533	60506	63904	64081	64092	64101	64754	64780	64793	64798	64853	64922	65018	65078	65125	65268	78986	79705	79706	79791	79883	79899	80059	80149	80279	80725	80824	80851	81848	83737	83891	84063	84152	84327	84335	84417	84619	84867	84919	84959	91662	91663	91862	93649	94030	94032	116496	120892	122809	124790	127435	131578	135228	142679	146760	150290	151242	152559	153090	154043	161742	171389	171392	200734	201163	221496	260434	284996	285315	285464	286430	338761	339977	347730	347731	349667	374403	388324	494551
GO:0001935	GO:ENDOTHELIAL CELL PROLIFERATION	94	177	207	283	335	348	350	383	405	498	650	652	654	659	796	857	858	889	947	949	1012	1232	1535	1739	1893	1960	2022	2081	2152	2247	2261	2324	2475	2658	2697	2833	3091	3146	3148	3162	3164	3357	3690	3725	3791	3952	4017	4323	4763	5155	5228	5291	5365	5578	5587	5613	5629	5797	6347	6356	6369	6387	6678	6772	7010	7026	7046	7057	7060	7422	7423	7432	7472	7474	7494	7498	7857	8742	8828	8829	8854	9037	9255	9270	10016	10344	11061	11235	22846	23213	23411	25865	26051	28984	51157	51162	51738	54567	55109	55145	55333	56005	57521	64102	79031	79400	79805	84913	93974	116844	168667	253260	441478
GO:0001936	GO:REGULATION OF ENDOTHELIAL CELL PROLIFERATION	94	177	207	283	348	350	383	405	498	650	652	654	659	857	858	889	1012	1232	1535	1893	1960	2022	2152	2247	2261	2324	2475	2658	2697	2833	3091	3148	3164	3357	3690	3725	3791	3952	4763	5155	5228	5365	5578	5587	5629	5797	6347	6356	6369	6387	6678	6772	7010	7026	7046	7057	7060	7422	7423	7432	7472	7474	7498	7857	8742	8828	8829	8854	9037	9255	10016	10344	11061	11235	22846	23213	23411	25865	26051	28984	51157	51162	51738	54567	55109	55333	56005	57521	64102	79031	79805	84913	93974	116844	253260	441478
GO:0001937	GO:NEGATIVE REGULATION OF ENDOTHELIAL CELL PROLIFERATION	94	177	348	350	498	857	858	889	2022	2658	2697	2833	4763	5797	6678	6772	7026	7046	7057	7498	7857	9255	11061	11235	22846	23213	28984	51738	54567	55333	64102	84913	93974
GO:0001938	GO:POSITIVE REGULATION OF ENDOTHELIAL CELL PROLIFERATION	94	207	283	383	405	650	652	654	659	857	858	1012	1232	1535	1893	1960	2152	2247	2261	2324	2475	2658	3091	3148	3164	3357	3690	3725	3791	4763	5155	5228	5365	5578	5587	5629	6347	6356	6369	6387	7010	7046	7060	7422	7423	7432	7472	7474	7857	8742	8828	8829	9037	10016	10344	23411	25865	26051	51157	51162	55109	56005	57521	79031	79805	116844	253260	441478
GO:0001941	GO:POSTSYNAPTIC MEMBRANE ORGANIZATION	348	1000	1056	1140	1742	1855	2119	2339	2668	2743	4038	4593	5649	5764	5913	8001	8292	9093	9378	9379	9419	9863	10243	11079	22829	22871	23613	54413	57502	57555	64101	85358
GO:0001942	GO:HAIR FOLLICLE DEVELOPMENT	16	91	324	538	596	861	864	998	1001	1499	1515	1622	1775	1896	1956	2068	2252	2255	2263	2304	2778	3065	3066	3229	3488	3516	3624	3872	3890	3911	4038	4089	4488	4804	4851	5154	5664	5970	6469	6608	6615	6662	7022	7042	7053	7124	7480	7976	8323	8456	8549	8626	8717	8861	9079	9355	9620	10468	10855	10913	11005	11166	22943	23405	25928	27121	27152	50814	51083	54345	55366	55504	57216	60485	60529	80199	80326	84283	94234	112802	114803	128178	135228	147183	147409	147495	340481	342574
GO:0001944	GO:VASCULATURE DEVELOPMENT	14	59	90	93	94	101	133	154	163	182	183	196	207	239	283	284	285	290	302	306	338	347	348	350	354	356	358	387	388	506	538	575	576	577	578	581	634	639	652	655	659	672	677	688	694	718	719	727	728	729	796	841	857	861	889	947	998	1000	1003	1012	1045	1046	1116	1121	1139	1215	1232	1277	1278	1281	1282	1284	1285	1289	1295	1296	1306	1395	1399	1432	1464	1482	1490	1491	1499	1512	1524	1545	1634	1649	1717	1747	1785	1890	1893	1901	1906	1909	1942	1948	1950	1954	1958	1960	1969	1990	2004	2013	2022	2028	2034	2041	2047	2048	2049	2050	2064	2069	2113	2116	2138	2152	2185	2191	2246	2247	2251	2253	2254	2255	2260	2263	2277	2294	2296	2303	2305	2307	2308	2321	2324	2335	2348	2624	2626	2627	2637	2658	2683	2697	2701	2702	2719	2737	2821	2822	2833	2837	2852	2876	2889	2969	3037	3082	3087	3091	3146	3162	3164	3198	3200	3202	3204	3209	3213	3248	3273	3280	3315	3339	3340	3373	3397	3479	3491	3516	3549	3552	3553	3569	3576	3579	3606	3627	3670	3678	3679	3685	3688	3689	3690	3696	3716	3725	3726	3791	3848	3911	3952	3976	3993	4015	4016	4017	4035	4036	4041	4052	4066	4091	4092	4162	4193	4208	4211	4215	4223	4240	4303	4313	4323	4327	4435	4627	4628	4638	4643	4691	4693	4734	4763	4775	4776	4824	4838	4846	4851	4853	4854	4855	4856	4879	4881	4897	4914	4915	5054	5080	5125	5140	5154	5155	5156	5159	5168	5175	5176	5196	5228	5290	5291	5294	5308	5310	5311	5316	5328	5333	5335	5345	5371	5396	5469	5532	5547	5578	5579	5587	5594	5598	5604	5607	5613	5626	5629	5663	5728	5734	5740	5743	5747	5754	5764	5784	5787	5795	5797	5906	5921	6019	6050	6091	6093	6094	6095	6237	6278	6303	6347	6352	6355	6356	6369	6376	6387	6422	6423	6443	6461	6464	6469	6495	6595	6608	6659	6672	6678	6688	6692	6722	6733	6772	6789	6794	6850	6862	6885	6886	6899	6909	6910	6915	6926	6934	6943	6997	7010	7021	7026	7042	7045	7046	7048	7057	7058	7060	7070	7075	7101	7127	7128	7137	7291	7342	7410	7422	7423	7424	7453	7472	7474	7476	7477	7481	7490	7494	7498	7541	7716	7763	7798	7855	7857	7994	8061	8100	8131	8289	8322	8325	8434	8456	8463	8613	8710	8742	8751	8817	8828	8829	8854	8877	8879	8928	9021	9037	9047	9255	9270	9289	9314	9353	9369	9378	9394	9421	9444	9451	9464	9475	9496	9497	9693	9723	9734	9784	9820	9990	10014	10016	10052	10163	10203	10266	10267	10352	10411	10413	10427	10451	10454	10481	10512	10519	10541	10553	10563	10630	10672	10855	10908	10911	10959	11005	11061	11064	11082	11146	11174	11235	22846	22899	22976	23054	23129	23166	23210	23213	23328	23405	23411	23414	23462	23493	23509	23554	23576	23592	23645	25831	25865	25932	25960	25976	26051	26057	26254	26259	26585	27035	27077	27286	27329	28514	28982	28984	28996	29072	50814	51129	51162	51176	51330	51378	51450	51564	51666	51684	51738	51752	54206	54345	54361	54538	54567	54583	54815	54828	54922	55109	55273	55294	55333	55576	55636	55662	55742	55897	56005	56848	56913	57007	57057	57105	57125	57178	57343	57381	57493	57496	57534	57674	58495	58504	60626	60675	64102	64218	64220	64321	64344	64783	65250	79031	79400	79602	79625	79652	79659	79733	79805	79812	79924	80149	80155	80199	80310	80314	80712	80781	81575	83478	83605	83700	83854	83943	84432	84516	84870	90268	90627	91010	92140	93649	93974	112744	113026	116150	116844	118856	126259	130497	144165	144455	146850	147372	153090	154796	164656	168667	204851	219699	221981	255324	284217	284340	374654	391104	441478	641700	729230
GO:0001945	GO:LYMPH VESSEL DEVELOPMENT	93	94	659	1948	2296	2303	2324	3791	5310	5532	5629	5784	6850	6899	7026	7422	7424	10630	22846	54345	57493	79652	147372
GO:0001947	GO:HEART LOOPING	585	1482	2022	2253	2348	2626	2697	3091	3549	4088	4208	4838	4851	5311	5663	6469	6491	6608	6722	6909	6926	7474	7547	8195	8928	9421	9464	9645	10660	22992	26005	26160	27031	28514	51098	51684	54345	54806	55036	55081	55212	55897	57057	57216	57534	58495	64321	65009	83852	89780	121643	123872	129880	200894	339829	344022	388389	388591
GO:0001952	GO:REGULATION OF CELL-MATRIX ADHESION	94	347	395	596	604	780	948	1012	1021	1029	1236	1307	1435	1613	1946	2013	2039	2041	2042	2185	2824	2932	3175	3204	3273	3611	3791	3987	4088	4323	4617	4653	4763	4771	4814	5054	5291	5295	5328	5590	5728	5747	5795	5879	5921	6093	6281	6366	6370	6385	6422	6548	6714	6997	7010	7057	7248	7402	7422	7424	8573	8751	8861	9270	9475	9480	9647	9723	9748	10395	10519	10631	23122	23332	23499	23603	26585	27185	29984	50488	51057	54361	54828	55920	56477	57669	59339	90102	340485	342184	349633
GO:0001953	GO:NEGATIVE REGULATION OF CELL-MATRIX ADHESION	94	347	395	604	1029	2039	3204	4323	4653	4763	4771	5054	5295	5728	5921	6714	7057	8573	8751	9270	9723	10395	10631	23122	23603	54828	55920	90102	340485	349633
GO:0001954	GO:POSITIVE REGULATION OF CELL-MATRIX ADHESION	948	1012	1021	1236	1307	1435	2013	2041	2185	2932	3273	3611	3791	3987	4088	4653	4814	5590	5795	5879	6093	6281	6366	6370	6385	6422	6997	7010	7248	7402	7422	7424	9270	9647	10519	27185	54361	56477	57669	59339	342184
GO:0001958	GO:ENDOCHONDRAL OSSIFICATION	249	652	654	860	1277	1280	1300	1305	1749	2261	2778	3339	3636	4208	4209	4322	4323	4325	4664	4665	5191	5744	7010	8817	54928	55790	162466	642658
GO:0001959	GO:REGULATION OF CYTOKINE-MEDIATED SIGNALING PATHWAY	103	284	329	330	335	558	841	857	972	1147	1435	1540	1893	1906	2150	2621	2672	2950	3091	3093	3263	3303	3304	3326	3439	3440	3441	3442	3443	3444	3445	3446	3447	3448	3449	3451	3452	3454	3455	3456	3458	3459	3460	3551	3557	3572	3654	3656	3661	3665	3716	3717	5048	5071	5468	5469	5770	5771	5777	5781	5788	6091	6233	6352	6586	6772	6773	6850	7124	7128	7132	7185	7186	7294	7297	7311	7314	7316	7341	7376	7444	7474	7837	8517	8554	8567	8651	8717	8737	8767	8772	8877	8887	8904	8996	9021	9093	9353	9370	10062	10293	10399	10554	10555	10616	11140	11213	11240	11274	22954	25999	26065	26228	26525	27342	29108	51588	54209	55072	57506	58509	59307	79594	81030	81858	84166	90268	117584	117854	152138	153222	171392	204851	246330	260434	286430	342979	353376	100133941
GO:0001960	GO:NEGATIVE REGULATION OF CYTOKINE-MEDIATED SIGNALING PATHWAY	103	335	857	1893	2150	2621	2950	3557	3572	5468	5771	5788	6091	6352	6586	7376	7837	8996	9093	9353	9370	10062	10293	11213	11240	26228	26525	27342	51588	58509	59307	79594	84166	117584	152138	171392	246330	260434	286430	342979
GO:0001961	GO:POSITIVE REGULATION OF CYTOKINE-MEDIATED SIGNALING PATHWAY	558	972	1435	1906	2621	2672	3091	3093	3263	3303	3304	3661	3665	5048	5071	5469	7186	7294	7474	8767	8772	8904	10554	10555	22954	26065	54209	57506	81030	84166	117854	153222	353376
GO:0001963	GO:SYNAPTIC TRANSMISSION, DOPAMINERGIC	409	1020	1141	1392	1393	1812	1813	1814	1815	1816	1861	2668	2844	5071	5743	5865	6531	6532	6622	7054	9132	9293	10211	11315	23551	25953	65018	85445	89832
GO:0001964	GO:STARTLE RESPONSE	1496	1812	1813	1814	1855	2173	2741	2743	2895	2902	2903	2904	2906	3084	3736	3756	4204	4861	5071	5179	5728	6531	7349	9378	64067	84189	116443
GO:0001967	GO:SUCKLING BEHAVIOR	334	351	1271	1602	2744	2902	2904	5021	5194	5457	9464	51009	51317	55585	130507	391723
GO:0001974	GO:BLOOD VESSEL REMODELING	29	93	94	147	182	183	186	538	558	578	581	613	633	659	1471	1621	1636	2034	2078	2253	2255	2296	2303	2324	3200	3273	3479	3516	3676	3976	4193	4208	4775	4846	6899	7040	7042	8048	8996	9474	10512	54567	64114	84870	729230
GO:0001975	GO:RESPONSE TO AMPHETAMINE	147	801	805	808	1269	1621	1649	1787	1808	1812	1813	1814	1815	1816	2774	2902	2903	3066	3251	3383	4922	4929	5020	5021	5153	5530	5903	6571	6647	7054	9734	84152	84867
GO:0001976	GO:NEUROLOGICAL SYSTEM PROCESS INVOLVED IN REGULATION OF SYSTEMIC ARTERIAL BLOOD PRESSURE	40	146	147	148	183	186	796	1813	4204	6196	6648	6869	7137	22953	59272	89797	89832
GO:0001977	GO:RENAL SYSTEM PROCESS INVOLVED IN REGULATION OF BLOOD VOLUME	134	1535	1579	1585	2013	2149	2150	2621	2697	2702	2837	3291	5155	5800	8529	10911	66002
GO:0001990	GO:REGULATION OF SYSTEMIC ARTERIAL BLOOD PRESSURE BY HORMONE	183	185	186	290	552	553	554	1215	1359	1511	1522	1535	1585	1636	1814	1816	1889	1906	1907	1908	2028	2149	2150	2702	3291	4311	4846	5021	5125	5345	5972	6196	6869	7080	8509	10159	10699	27035	59272	81285	91608
GO:0001991	GO:REGULATION OF SYSTEMIC ARTERIAL BLOOD PRESSURE BY CIRCULATORY RENIN-ANGIOTENSIN	183	186	290	1215	1359	1511	1522	1636	1889	2028	2149	2150	2702	4311	5125	5972	8509	10159	59272	81285
GO:0002009	GO:MORPHOGENESIS OF AN EPITHELIUM	25	27	90	94	133	182	183	186	220	317	374	387	388	389	538	578	581	585	596	650	652	655	760	768	780	841	859	861	864	960	998	1072	1147	1282	1289	1427	1435	1436	1460	1482	1499	1512	1515	1522	1601	1605	1739	1741	1839	1855	1856	1857	1861	1906	1909	1948	1950	1951	1952	1954	1956	1969	2022	2043	2045	2099	2118	2119	2138	2239	2246	2247	2248	2252	2253	2255	2260	2261	2263	2294	2295	2297	2303	2304	2348	2487	2535	2625	2626	2637	2648	2658	2668	2683	2697	2719	2736	2737	2885	2908	2909	2926	2934	3064	3082	3087	3091	3169	3170	3202	3207	3209	3212	3214	3217	3237	3239	3280	3371	3479	3480	3488	3491	3516	3549	3569	3579	3586	3611	3627	3651	3678	3714	3791	3845	3868	3872	3911	3975	3976	3993	4040	4041	4070	4088	4089	4208	4214	4233	4300	4321	4323	4435	4478	4488	4522	4609	4775	4776	4804	4824	4838	4851	4853	4855	4919	4920	4976	5048	5058	5076	5077	5087	5100	5154	5216	5228	5241	5268	5308	5310	5311	5361	5371	5420	5469	5499	5567	5613	5623	5629	5663	5727	5744	5754	5829	5879	5898	5914	5916	5979	6091	6239	6256	6259	6262	6299	6338	6356	6385	6387	6422	6423	6469	6491	6495	6497	6558	6591	6608	6615	6657	6659	6662	6663	6664	6688	6692	6714	6722	6768	6772	6776	6788	6789	6862	6868	6885	6899	6909	6910	6926	6928	6939	6943	7020	7022	7040	7042	7048	7050	7052	7053	7074	7080	7124	7189	7248	7249	7289	7291	7403	7408	7414	7421	7422	7424	7471	7472	7474	7475	7476	7477	7481	7482	7484	7490	7546	7547	7798	7849	7855	7976	8092	8195	8202	8289	8312	8321	8323	8324	8456	8463	8521	8543	8549	8557	8626	8642	8650	8820	8829	8854	8914	8915	8928	8945	8985	9021	9037	9096	9231	9241	9314	9353	9355	9368	9420	9421	9423	9464	9496	9500	9585	9620	9645	9723	9788	9839	9863	9968	10082	10116	10155	10229	10252	10253	10371	10395	10413	10427	10481	10512	10522	10653	10660	10672	10736	10765	10787	10818	10890	11019	11146	11235	11331	22881	22992	23002	23122	23129	23213	23242	23322	23332	23405	23513	23654	23767	25831	25865	25902	25928	25932	26005	26146	26160	26249	26585	27031	27086	27152	28514	29072	30812	43847	51098	51176	51339	51384	51684	51715	51804	54101	54345	54361	54567	54806	54815	54903	54910	54922	55036	55081	55083	55212	55327	55366	55727	55740	55764	55897	56288	56998	57057	57167	57216	57534	57619	57669	57822	58495	59277	64321	64398	64399	64412	64783	65009	65250	65266	65979	79191	79192	79600	79633	79977	80144	80184	80199	80326	81792	81839	83478	83605	83852	84133	84283	84678	84870	84962	85407	89780	90102	90627	94134	94234	112802	115908	121643	123872	126695	128272	129880	130497	131405	144165	146206	147183	151449	153572	157506	160418	163183	166336	170690	200894	219736	253430	255743	284217	339829	340419	341640	342184	342574	344022	349633	388389	388585	388591	441478
GO:0002011	GO:MORPHOGENESIS OF AN EPITHELIAL SHEET	94	182	387	389	780	1147	1289	1605	1839	1855	1856	1861	1954	2934	3212	3214	3491	3678	4040	4214	4321	4488	4851	4853	6239	6338	6664	6722	6868	7474	7476	11235	23122	23332	23767	54567	55327	56288	57057	57216	64398	65979	83478	84962	90102	94134	146206	284217	349633
GO:0002021	GO:RESPONSE TO DIETARY EXCESS	153	154	155	348	886	2863	3952	4160	5468	7425	7442	9573	10891	27344	51052	53405	56923	79718	80010	114789	115209	130399	353500
GO:0002026	GO:REGULATION OF THE FORCE OF HEART CONTRACTION	133	147	148	153	154	156	476	477	488	493	817	857	1113	1907	2548	3458	4624	4625	4633	4634	4635	4842	4846	5350	5578	6262	6546	6548	8048	8862	10539
GO:0002027	GO:REGULATION OF HEART RATE	100	133	147	148	153	183	186	287	488	552	776	777	796	801	805	808	817	845	857	859	1395	1756	1813	1824	1829	1832	1906	1907	1908	2034	2281	2697	2702	3270	3728	3741	3753	3757	3759	3784	4159	4193	4194	4607	4624	4625	4878	5020	5144	5318	5350	5566	6262	6324	6327	6330	6331	6336	6505	6546	6640	6717	6720	6863	6870	7168	7531	8620	8913	9722	9992	10021	10142	10265	10371	10911	11149	23171	23493	23630	29098	29119	51086	55800	57731	64091	80763	89832
GO:0002028	GO:REGULATION OF SODIUM ION TRANSPORT	81	154	183	207	288	375	476	477	481	482	483	486	493	817	859	1272	1482	1739	1756	1760	1785	1813	1814	1815	2040	2257	2259	2745	3551	4734	4842	4846	5025	5027	5187	5270	5318	5348	5349	5581	5652	5774	6324	6327	6330	6331	6338	6446	6546	6548	6550	6640	7040	7402	7533	9368	9399	10110	10768	11261	23171	23327	23678	29098	51297	53827	53828	54997	55800	57731	65267	65268	79570	128414	150094	150684	154043	154215	255738	286183	100533105
GO:0002029	GO:DESENSITIZATION OF G-PROTEIN COUPLED RECEPTOR PROTEIN SIGNALING PATHWAY	133	154	156	408	409	796	816	1759	1785	1813	1814	2696	2868	2869	2870	2966	3351	3357	5338	5733	29978
GO:0002040	GO:SPROUTING ANGIOGENESIS	94	284	387	652	998	1012	1948	1960	2050	2185	2247	2303	2324	2822	3146	3164	3678	3688	3716	3791	4017	4851	5228	5607	5743	6091	6722	6997	7010	7057	7101	7422	8829	9037	9270	9314	9353	9723	9734	10014	10266	10519	11082	11235	23210	25960	26051	26585	27286	28514	51176	51564	54567	55333	55742	57674	79733	79812	84870	90268	90627	144455	147372	168667	441478	729230
GO:0002042	GO:CELL MIGRATION INVOLVED IN SPROUTING ANGIOGENESIS	387	1948	1960	2050	2247	2303	2822	3164	3688	3791	4851	5607	5743	6091	6722	6997	7101	7422	8829	9270	9314	9353	9734	10014	10519	11235	26585	27286	51564	54567	79812	90627	729230
GO:0002052	GO:POSITIVE REGULATION OF NEUROBLAST PROLIFERATION	1499	1524	1638	1813	2737	3091	4851	5080	6376	6469	6604	6608	6657	6663	7422	7424	7976	23440	27185	63925	63950	259266
GO:0002053	GO:POSITIVE REGULATION OF MESENCHYMAL CELL PROLIFERATION	394	657	1499	2254	2260	2263	3549	3667	3791	4041	4609	5154	5396	6468	6469	6474	6495	6608	6662	6772	6899	7048	7422	7472	7474	8626	8646	8660	9096	51450	93986
GO:0002062	GO:CHONDROCYTE DIFFERENTIATION	94	265	579	650	652	654	657	658	659	860	861	864	871	1280	1297	1301	1432	1490	1499	2202	2254	2260	2261	2734	2736	2737	2822	3207	3237	3339	3549	4017	4088	4094	4146	4208	4209	4488	4781	4856	4880	5447	5578	5744	5745	5915	5916	5970	6423	6474	6591	6660	6662	7040	7045	7046	7048	7227	7476	7480	7482	7483	7704	8091	8200	8313	8817	9451	10736	10865	11173	22856	23213	26585	50515	51320	54360	54928	55553	55959	64764	80856	81029	81792	85301	85477	91461	116039	130497	144347	150356	359845	375056	389125	392255	399979	642658	100533183
GO:0002063	GO:CHONDROCYTE DEVELOPMENT	658	659	860	871	1301	4146	4488	5916	6423	6474	6662	7048	8313	8817	9451	22856	23213	50515	51320	54928	55959	85301	144347	359845	375056	100533183
GO:0002064	GO:EPITHELIAL CELL DEVELOPMENT	59	182	183	406	491	546	572	579	631	639	652	653	654	688	998	1003	1021	1026	1365	1419	1471	1499	1761	1775	1874	1903	1969	2022	2099	2100	2150	2260	2261	2263	2302	2303	2317	2355	2625	2668	2683	2697	2810	2876	2889	2931	2932	2947	3091	3169	3175	3202	3209	3274	3295	3383	3397	3549	3551	3553	3642	3913	3976	4214	4233	4301	4435	4478	4643	4647	4821	4825	4851	4855	4868	4914	5048	5076	5080	5138	5144	5155	5170	5241	5420	5624	5629	5802	5872	5879	5906	5908	5914	5915	5916	5926	5962	5991	6009	6093	6098	6299	6382	6496	6608	6647	6662	6768	6772	6781	6939	7022	7082	7111	7122	7124	7132	7298	7401	7430	7431	7474	7476	7477	7484	7490	7494	7716	7827	7849	7852	8100	8324	8419	8626	8826	8985	9210	9294	9368	9370	9414	9475	9480	9497	9575	9693	9863	10116	10142	10409	10411	10427	10481	10653	10736	10818	11061	22862	23022	23086	23094	23405	23513	25803	25932	26051	26084	26585	28514	29842	30812	50848	51057	51092	51742	53405	54345	54361	54768	56288	56913	57103	57111	57493	57530	57619	57669	57826	57835	60484	64072	64102	64919	79955	79977	80173	80781	81029	83605	84189	84283	91181	91663	117531	122786	126695	128637	137964	153562	161497	168002	196383	220074	221037	222662	286451	338879	340547	353116	389015
GO:0002065	GO:COLUMNAR/CUBOIDAL EPITHELIAL CELL DIFFERENTIATION	182	406	429	474	491	572	579	596	639	650	652	653	654	688	1000	1021	1026	1045	1523	1747	1908	1910	2016	2253	2260	2263	2626	2627	2672	2737	2767	2776	2931	2932	3091	3169	3202	3280	3516	3596	3642	3651	3714	3778	3815	4208	4221	4254	4286	4435	4610	4644	4646	4647	4760	4821	4825	4838	4851	4948	5048	5080	5170	5358	5459	5629	5753	5873	5879	5914	5915	5916	5991	6009	6098	6256	6608	6647	6659	6663	6664	7298	7306	7401	7474	7481	8626	8975	9368	9497	9575	9839	10083	10427	10551	22992	23405	23493	23513	25803	26258	27077	28514	51057	51092	51176	53405	54361	55283	55686	56647	56913	56975	57103	57619	60485	64072	79084	79803	79955	80070	83938	84189	89781	117531	133396	137964	140628	157848	161497	220074	222546	222662	286451	388585	389207	391104	100506049
GO:0002066	GO:COLUMNAR/CUBOIDAL EPITHELIAL CELL DEVELOPMENT	406	491	572	579	639	652	653	654	688	1021	1026	2260	2931	2932	3091	3202	3642	4647	4821	4825	5048	5080	5170	5879	5914	5915	5916	5991	6009	6098	6608	6647	7298	7401	7474	9368	9497	9575	10427	23405	23513	25803	28514	51057	51092	53405	56913	57103	57619	64072	79955	84189	117531	137964	161497	220074	222662	286451
GO:0002067	GO:GLANDULAR EPITHELIAL CELL DIFFERENTIATION	406	429	572	650	652	653	654	1021	2253	2263	2627	2931	2932	3169	3202	3280	3596	3642	3651	4221	4760	4821	4825	4851	5080	5170	5629	5914	5915	5916	5991	6009	6256	6608	7474	8626	9575	10551	25803	28514	51092	54361	79084	133396	137964	157848	222546	391104
GO:0002068	GO:GLANDULAR EPITHELIAL CELL DEVELOPMENT	406	572	652	653	654	1021	2931	2932	3642	4821	4825	5080	5170	5914	5915	5916	5991	6009	6608	7474	9575	28514	51092	137964
GO:0002070	GO:EPITHELIAL CELL MATURATION	1026	2697	3091	3169	3202	4825	5241	5991	6496	7298	7494	10116	10481	29842	84283	137964
GO:0002076	GO:OSTEOBLAST DEVELOPMENT	43	632	860	2099	2736	3199	3727	4041	4088	4221	4488	5744	5745	6469	8994	9759	10014	23314	23462	23601
GO:0002082	GO:REGULATION OF OXIDATIVE PHOSPHORYLATION	89	345	538	4656	6622	7415	10105	11315	29103	51085	65018	79085	84275	84300	90480	163747
GO:0002088	GO:LENS DEVELOPMENT IN CAMERA-TYPE EYE	357	631	652	1017	1019	1410	1411	1412	1418	1419	1421	1427	1497	1499	1739	1969	2261	2263	2301	2625	2697	2703	3982	4088	4094	4211	4284	4771	4810	4916	5080	5309	5469	5629	5818	6496	6497	6498	6656	6657	6664	7040	7046	7048	7111	7431	7472	7474	7476	7477	7482	8412	8419	9839	10765	10818	23424	23657	25945	28996	50937	51343	81029	84189	90780	128637	146862	147912	204851	221322
GO:0002089	GO:LENS MORPHOGENESIS IN CAMERA-TYPE EYE	357	652	1419	1499	1969	2261	4211	5309	5629	5818	6496	6497	6656	6657	6664	8412	23424	25945	28996	128637	204851
GO:0002090	GO:REGULATION OF RECEPTOR INTERNALIZATION	284	302	375	408	409	967	1742	1813	4908	5336	6311	6386	6401	6424	6456	6850	7422	8898	9463	9779	9863	10211	22943	26045	26585	29978	54806	55333	55681	57817	84867	84896	89780	255738	284654	347730
GO:0002092	GO:POSITIVE REGULATION OF RECEPTOR INTERNALIZATION	284	408	409	967	1813	4908	5336	6401	6424	6850	7422	9463	9779	9863	26585	54806	55333	55681	57817	84867	84896	89780	255738
GO:0002181	GO:CYTOPLASMIC TRANSLATION	1938	1939	1978	2935	4690	5936	6128	6129	6132	6133	6138	6146	6154	6159	6160	6165	6173	8531	8562	8661	8664	8669	8872	9001	10480	22849	23708	24140	25873	25946	28985	51121	51441	56339	64506	80315	85451	132864	200916	285855
GO:0002200	GO:SOMATIC DIVERSIFICATION OF IMMUNE RECEPTORS	103	472	604	940	958	959	2067	2956	3146	3148	3329	3458	3558	3565	3586	3981	4292	4436	4437	4683	5379	5383	5395	5423	5591	5896	5897	6778	6830	6929	6932	7040	7292	7374	7468	8741	9025	9156	9466	9730	9984	10538	10721	22976	23075	23529	27343	27434	30009	50943	51010	51176	56259	57379	64421	64919	80762	118460	165918	200558	389643	107161145
GO:0002204	GO:SOMATIC RECOMBINATION OF IMMUNOGLOBULIN GENES INVOLVED IN IMMUNE RESPONSE	604	940	958	959	2067	2956	3329	3458	3558	3565	3586	3981	4292	4436	4683	6778	6830	7040	7292	7374	7468	8741	9025	9156	9466	9984	10538	22976	23075	23529	30009	50943	51010	57379	80762	118460	165918	200558
GO:0002208	GO:SOMATIC DIVERSIFICATION OF IMMUNOGLOBULINS INVOLVED IN IMMUNE RESPONSE	604	940	958	959	2067	2956	3329	3458	3558	3565	3586	3981	4292	4436	4683	6778	6830	7040	7292	7374	7468	8741	9025	9156	9466	9984	10538	22976	23075	23529	30009	50943	51010	57379	80762	118460	165918	200558
GO:0002209	GO:BEHAVIORAL DEFENSE RESPONSE	116	596	627	777	885	1392	1622	1803	1812	1815	1977	1981	2100	2558	2697	2788	2898	2904	3350	3358	4192	4204	4208	4761	4887	5179	6198	7101	7349	7416	8622	10522	23542	57679	64854	84961
GO:0002218	GO:ACTIVATION OF INNATE IMMUNE RESPONSE	101	329	330	331	409	466	695	708	801	805	808	841	857	929	942	948	1147	1326	1385	1386	1387	1432	1508	1513	1514	1520	1535	1540	1755	1845	1846	1848	1849	2002	2033	2150	2207	2219	2353	2534	2672	2867	3055	3146	3265	3303	3304	3329	3384	3385	3428	3551	3553	3654	3656	3659	3661	3662	3665	3684	3689	3708	3709	3710	3725	3845	3929	4057	4067	4205	4208	4214	4615	4772	4773	4775	4790	4791	4792	4793	4795	4893	5058	5062	5063	5170	5289	5336	5528	5530	5532	5534	5566	5567	5568	5580	5581	5594	5595	5598	5599	5600	5601	5602	5604	5606	5608	5609	5641	5682	5683	5684	5685	5686	5687	5688	5689	5690	5691	5692	5693	5694	5695	5696	5698	5699	5700	5701	5702	5704	5705	5706	5707	5708	5709	5710	5711	5713	5714	5715	5716	5717	5718	5719	5720	5721	5894	5970	5971	6195	6196	6197	6233	6397	6416	6500	6714	6850	6885	7096	7097	7098	7099	7100	7105	7128	7184	7187	7189	7301	7311	7314	7316	7321	7322	7323	7334	7335	7867	8454	8517	8685	8737	8767	8772	8915	8945	8993	9020	9039	9040	9252	9261	9447	9491	9572	9641	9698	9861	9865	9971	10010	10062	10197	10211	10213	10318	10333	10392	10454	10695	10892	11035	11213	22914	23098	23118	23180	23198	23291	23369	23586	23643	25942	26007	26057	26065	26191	26253	29108	29110	29979	30835	30849	50856	51135	51284	51311	54106	55366	55601	55914	56829	57115	57161	57162	57402	57506	57590	58484	58509	64127	64135	64170	64581	79132	79155	79671	79931	81035	81622	81793	83737	84433	85363	89870	90268	91543	92747	93978	114609	114770	114771	115004	118788	122706	130120	143471	148022	153090	170482	171389	257397	286430	338339	338382	340061	353376	377630	730249	100528032
GO:0002220	GO:INNATE IMMUNE RESPONSE ACTIVATING CELL SURFACE RECEPTOR SIGNALING PATHWAY	801	805	808	841	1147	1387	2033	2207	2219	2534	2867	3265	3384	3385	3551	3553	3708	3709	3710	3845	4067	4772	4773	4775	4790	4791	4792	4893	5058	5062	5063	5170	5336	5530	5532	5534	5566	5567	5568	5580	5682	5683	5684	5685	5686	5687	5688	5689	5690	5691	5692	5693	5694	5695	5696	5698	5699	5700	5701	5702	5704	5705	5706	5707	5708	5709	5710	5711	5713	5714	5715	5716	5717	5718	5719	5720	5721	5894	5970	5971	6233	6500	6714	6850	6885	7097	7189	7311	7314	7316	7321	7322	7334	7335	8454	8517	8915	8945	9020	9039	9040	9252	9491	9861	10197	10213	10454	10892	22914	23118	23198	23291	26253	29108	30835	50856	64170	64581	84433	93978	122706	143471	170482	257397	338339	100528032
GO:0002221	GO:PATTERN RECOGNITION RECEPTOR SIGNALING PATHWAY	329	330	331	409	466	695	708	841	857	929	942	948	1147	1326	1385	1386	1432	1508	1513	1514	1520	1535	1540	1755	1845	1846	1848	1849	2002	2150	2219	2353	2672	2867	3146	3303	3304	3329	3551	3654	3656	3659	3661	3662	3665	3684	3689	3725	3929	4057	4067	4205	4208	4214	4615	4790	4791	4792	4793	4795	5170	5289	5528	5581	5594	5595	5598	5599	5600	5601	5602	5604	5606	5608	5609	5641	5970	6195	6196	6197	6233	6397	6416	6500	6885	7096	7097	7098	7099	7100	7105	7128	7184	7187	7189	7301	7311	7314	7316	7321	7322	7323	7334	7335	7867	8454	8517	8685	8737	8767	8772	8915	8945	8993	9252	9261	9572	9641	9698	9865	9971	10010	10062	10211	10318	10333	10392	10454	10695	11035	11213	23098	23118	23180	23291	23369	23586	23643	26007	26057	26065	26191	29110	29979	30849	51135	51284	51311	54106	55366	55601	55914	56829	57115	57161	57162	57402	57506	57590	58509	64127	64135	64170	64581	79132	79155	79671	79931	81035	81622	81793	83737	85363	89870	90268	91543	92747	114609	114770	114771	118788	130120	148022	153090	171389	257397	286430	338382	353376	377630	730249
GO:0002223	GO:STIMULATORY C-TYPE LECTIN RECEPTOR SIGNALING PATHWAY	801	805	808	841	1147	1387	2033	2207	2534	3265	3384	3385	3551	3553	3708	3709	3710	3845	4067	4772	4773	4775	4790	4791	4792	4893	5058	5062	5063	5170	5336	5530	5532	5534	5566	5567	5568	5580	5682	5683	5684	5685	5686	5687	5688	5689	5690	5691	5692	5693	5694	5695	5696	5698	5699	5700	5701	5702	5704	5705	5706	5707	5708	5709	5710	5711	5713	5714	5715	5716	5717	5718	5719	5720	5721	5894	5970	5971	6233	6500	6714	6850	6885	7189	7311	7314	7316	7321	7322	7334	7335	8454	8517	8915	8945	9020	9039	9040	9252	9491	9861	10197	10213	10454	10892	22914	23118	23198	23291	26253	29108	30835	50856	64170	64581	84433	93978	122706	143471	170482	257397	338339	100528032
GO:0002224	GO:TOLL-LIKE RECEPTOR SIGNALING PATHWAY	329	330	409	466	695	841	857	929	942	948	1147	1326	1385	1386	1432	1508	1513	1514	1520	1535	1845	1846	1848	1849	2002	2150	2353	2672	3146	3329	3551	3654	3656	3659	3661	3662	3665	3684	3689	3725	3929	4057	4067	4205	4208	4214	4615	4790	4791	4792	4793	4795	5170	5289	5528	5581	5594	5595	5598	5599	5600	5601	5602	5604	5606	5608	5609	5641	5970	6195	6196	6197	6233	6416	6500	6885	7096	7097	7098	7099	7100	7128	7184	7187	7189	7301	7311	7314	7316	7321	7322	7323	7334	7335	7867	8454	8517	8737	8767	8772	8915	8945	9252	9261	9572	9641	9865	9971	10010	10062	10211	10318	10333	10392	10454	10695	11035	11213	23098	23118	23180	23291	23643	26191	29110	29979	30849	51135	51284	51311	54106	55366	57161	57162	57402	57590	58509	64127	79155	79931	81035	81622	81793	91543	92747	114609	118788	130120	148022	153090	171389	257397	286430	338382	353376	730249
GO:0002227	GO:INNATE IMMUNE RESPONSE IN MUCOSA	337	820	1667	1668	1672	2197	3565	4057	4843	5319	6037	6170	8339	8343	8344	8346	8347	8349	8970	54145	64127	85236	92747	728358
GO:0002228	GO:NATURAL KILLER CELL MEDIATED IMMUNITY	164	409	1054	1130	3002	3105	3106	3133	3481	3592	3593	3811	3822	3824	3902	3916	3952	3965	4068	4277	5052	5272	5777	5817	5819	5873	6318	6776	6777	6845	6890	7409	8676	9437	10125	10383	10666	10859	11151	22914	23705	56253	57823	59067	79465	80328	80329	114836	117157	127544	135250	146850	154064	201294	203068	259197	353091	387836	100431172	100507436	100528032
GO:0002230	GO:POSITIVE REGULATION OF DEFENSE RESPONSE TO VIRUS BY HOST	308	481	766	1351	1359	1366	1965	2040	2168	2215	2252	2259	2542	2558	2660	3250	3565	3593	3594	3784	4130	4190	4638	4913	5166	5194	5273	5371	5539	6323	6507	6628	6629	6632	6773	7004	7311	7743	8110	8208	8350	8351	8352	8353	8354	8355	8356	8357	8358	8464	8504	8736	8968	9447	9469	9513	9688	9715	9788	9796	9798	9982	10488	10675	10758	10859	22918	22985	23043	23586	25758	25804	25942	27120	27198	29923	29995	51000	51116	51291	51306	51308	51340	51538	51561	51676	54210	54212	54432	54890	55116	55120	55159	55163	55172	55173	55254	55343	55777	57007	57154	57506	60386	60489	80149	80216	80271	92400	94059	94107	115004	117854	139741	148213	149233	149466	200316	283316	339834	340061	387849	401466	440275
GO:0002237	GO:RESPONSE TO MOLECULE OF BACTERIAL ORIGIN	19	25	29	54	128	133	207	210	249	338	355	356	383	445	496	558	567	613	623	639	654	705	706	721	728	834	836	841	842	886	923	929	939	941	942	943	948	949	954	958	1051	1053	1147	1234	1236	1267	1268	1269	1312	1373	1432	1437	1440	1511	1524	1543	1544	1586	1594	1604	1634	1786	1906	1909	1910	1991	2056	2149	2152	2241	2255	2326	2335	2353	2643	2672	2796	2919	2920	2921	2950	3055	3066	3091	3148	3158	3297	3329	3383	3394	3454	3458	3479	3551	3553	3569	3576	3586	3587	3592	3593	3595	3596	3604	3606	3620	3627	3654	3656	3661	3663	3717	3725	3726	3727	3764	3929	3934	3965	4016	4049	4055	4056	4057	4064	4067	4129	4208	4257	4258	4282	4283	4353	4360	4435	4670	4691	4790	4791	4792	4793	4795	4804	4842	4843	4846	4851	4899	4982	4986	4988	5027	5029	5054	5074	5142	5144	5179	5196	5197	5321	5328	5336	5467	5473	5578	5581	5594	5595	5599	5601	5610	5627	5724	5731	5732	5733	5734	5737	5739	5743	5914	5970	5972	5976	6197	6198	6278	6279	6347	6348	6352	6364	6372	6373	6374	6401	6403	6556	6590	6622	6678	6714	6770	6772	6777	6833	6863	6868	6915	6929	7020	7038	7040	7054	7056	7079	7080	7096	7097	7099	7100	7124	7128	7132	7133	7189	7292	7293	7356	7412	7436	7474	7494	7855	7867	8473	8651	8718	8754	8764	8767	8771	8784	8792	8793	8794	8795	8797	8915	9021	9112	9261	9450	9516	9536	9572	9646	9971	10014	10062	10068	10221	10288	10333	10417	10563	10594	10804	10859	10891	10892	10935	10949	11009	11019	11213	11221	22904	22914	22933	23097	23328	23643	23729	25819	26191	26228	27063	27086	27242	29108	54106	54209	54623	54658	55122	55593	55829	55914	55970	57048	57088	57162	57379	57402	58191	58509	59307	63826	64127	64170	79155	79577	79931	80149	84957	85363	92140	114548	114609	117854	124599	129607	148022	149233	153090	197358	245928	284297	342979	353376	729230	730249	100133941	100528032
GO:0002244	GO:HEMATOPOIETIC PROGENITOR CELL DIFFERENTIATION	103	596	652	673	861	1021	1030	1106	1636	1938	2009	2033	2068	2296	2313	2322	2551	2623	2624	2625	3148	3213	3214	3276	3280	3589	3624	3791	3815	3981	4208	4211	4222	4291	4780	4851	5134	5196	5305	5341	5469	5591	5610	5663	5664	5777	5781	5788	5803	5978	6422	6429	6469	6547	6654	6655	6659	6667	6670	6688	6722	6886	7040	7066	7153	7520	7564	8294	8359	8360	8361	8362	8363	8364	8365	8366	8367	8368	8370	8514	8692	8874	9119	9841	10006	10163	10272	10443	10468	10519	10538	11149	22890	23028	23094	23212	23215	23218	23335	23495	23648	25942	25946	26013	26108	26276	54443	54502	54790	54997	55008	55260	55326	55512	55526	57623	64428	79819	80739	83700	83881	84138	85439	85477	89777	91298	93436	96459	115761	118856	121340	121504	147744	147808	157570	161882	167153	168002	201163	219285	255631	256957	285966	338382	388585	388697	554313	641649
GO:0002250	GO:ADAPTIVE IMMUNE RESPONSE	100	177	182	214	246	301	355	567	602	604	608	695	708	710	712	713	714	715	716	717	718	719	720	721	722	725	727	729	730	731	732	733	735	814	909	910	911	913	920	923	924	925	926	927	939	940	941	942	958	959	972	973	974	1075	1130	1178	1191	1378	1380	1445	1493	1512	1514	1520	1604	1739	1880	2013	2015	2067	2185	2205	2207	2208	2210	2243	2244	2302	2534	2625	2794	2956	3002	3077	3105	3106	3108	3119	3123	3125	3126	3127	3133	3142	3146	3263	3329	3383	3426	3439	3440	3441	3442	3443	3444	3445	3446	3447	3448	3449	3451	3452	3456	3458	3467	3493	3494	3495	3497	3500	3501	3502	3503	3507	3512	3514	3537	3538	3539	3542	3543	3553	3558	3565	3566	3569	3572	3575	3586	3592	3593	3594	3598	3606	3635	3659	3662	3665	3702	3717	3718	3903	3981	4049	4063	4067	4068	4153	4179	4208	4277	4292	4436	4683	4734	4791	5027	5290	5291	5293	5294	5452	5532	5579	5580	5585	5588	5590	5777	5788	5817	5819	5873	5896	5971	5987	6095	6097	6363	6375	6504	6556	6693	6778	6830	6850	6868	6885	6890	6891	7006	7030	7040	7099	7124	7128	7186	7189	7248	7292	7294	7374	7454	7462	7468	7535	7784	7855	7942	8284	8320	8417	8631	8676	8741	8767	8772	8792	8809	8832	8915	8995	9025	9156	9173	9245	9466	9655	9984	10068	10148	10288	10332	10333	10384	10462	10538	10563	10666	10673	10747	10859	10892	10990	11006	11024	11025	11026	11027	11035	11118	11119	11221	22890	22914	22976	23075	23180	23308	23411	23495	23529	23547	25865	27040	27074	27240	27242	28299	28317	28442	28454	28526	28776	28834	28874	28876	28896	28908	28912	28916	28988	29108	30009	30835	50852	50856	50943	51010	51176	51279	51311	51561	51744	51752	53833	54440	54795	54900	54923	54941	55061	55611	55824	56832	56940	57379	57823	57824	64005	64092	64115	64127	64167	64218	64421	79168	79679	79908	80762	81622	83417	83700	83953	84174	84766	84868	84876	89857	90865	91543	93978	114548	114836	115650	117157	118460	127544	133396	135250	149041	149233	151888	163486	165918	170482	200558	201294	202309	220972	246778	259197	285852	338322	338339	338376	339390	387357	390530	440275	440786	729230	100132417	100423062	100507436	100528032
GO:0002251	GO:ORGAN OR TISSUE SPECIFIC IMMUNE RESPONSE	337	820	1667	1668	1672	2197	2865	2867	3565	3569	3570	4057	4843	5284	5319	6037	6170	6375	8339	8343	8344	8346	8347	8349	8741	8970	9245	54145	56957	64127	64284	85236	92747	163702	282616	728358
GO:0002252	GO:IMMUNE EFFECTOR PROCESS	2	25	29	60	71	100	103	104	136	160	161	162	163	164	177	182	284	301	306	308	329	330	335	336	339	355	375	409	481	538	566	567	596	602	604	613	629	661	664	665	684	695	708	710	712	713	714	715	716	717	718	720	721	722	725	727	729	730	731	732	733	735	766	911	917	919	920	925	926	939	940	941	942	948	951	958	959	961	966	972	998	1051	1054	1072	1075	1113	1130	1173	1174	1175	1178	1191	1351	1359	1366	1378	1380	1398	1401	1511	1512	1524	1525	1604	1621	1636	1667	1668	1675	1739	1755	1793	1794	1880	1965	1991	2013	2040	2067	2150	2168	2185	2205	2207	2208	2209	2212	2214	2215	2219	2220	2241	2242	2252	2259	2268	2302	2529	2534	2542	2558	2624	2625	2633	2635	2660	2794	2865	2867	2885	2956	3002	3055	3071	3075	3077	3078	3105	3106	3108	3109	3119	3123	3125	3126	3127	3133	3142	3146	3162	3250	3263	3320	3326	3329	3383	3426	3428	3433	3434	3437	3439	3440	3441	3442	3443	3444	3445	3446	3447	3448	3449	3451	3452	3454	3456	3458	3467	3481	3493	3494	3495	3497	3500	3501	3502	3503	3507	3514	3537	3538	3539	3542	3543	3553	3558	3559	3565	3566	3567	3569	3570	3575	3586	3588	3592	3593	3594	3596	3598	3600	3609	3627	3630	3635	3659	3661	3662	3663	3665	3669	3683	3708	3709	3710	3718	3764	3784	3811	3815	3822	3824	3848	3902	3916	3929	3932	3936	3952	3955	3956	3958	3964	3965	3981	3984	4049	4063	4064	4067	4068	4130	4153	4179	4190	4242	4277	4282	4283	4292	4353	4436	4542	4599	4600	4602	4620	4638	4641	4651	4683	4690	4843	4853	4913	4938	4939	4940	4986	5027	5052	5058	5062	5094	5166	5170	5194	5199	5225	5245	5272	5273	5290	5291	5293	5294	5295	5296	5319	5335	5336	5338	5359	5366	5371	5452	5473	5495	5532	5539	5551	5580	5581	5585	5590	5591	5594	5595	5610	5611	5627	5648	5650	5654	5663	5664	5724	5734	5747	5777	5788	5806	5817	5819	5873	5879	5880	5914	5950	5970	5971	6041	6095	6097	6223	6284	6318	6323	6347	6348	6363	6375	6397	6504	6507	6556	6628	6629	6632	6693	6714	6772	6773	6776	6777	6778	6810	6813	6814	6830	6844	6845	6850	6868	6885	6890	6895	7004	7009	7010	7040	7042	7043	7097	7098	7099	7105	7124	7128	7157	7186	7187	7189	7248	7292	7293	7305	7311	7374	7409	7410	7448	7454	7456	7462	7468	7474	7494	7525	7535	7706	7728	7743	7784	7855	8013	8110	8208	8284	8320	8350	8351	8352	8353	8354	8355	8356	8357	8358	8398	8417	8464	8482	8504	8519	8547	8638	8673	8676	8678	8692	8723	8729	8736	8741	8764	8767	8772	8773	8809	8832	8905	8907	8915	8968	8976	8993	8995	9025	9156	9245	9255	9437	9447	9466	9469	9474	9513	9582	9636	9655	9688	9698	9715	9788	9796	9798	9844	9846	9865	9982	9984	10006	10053	10060	10077	10092	10093	10094	10095	10096	10097	10109	10125	10163	10346	10379	10383	10384	10410	10417	10451	10458	10475	10488	10533	10538	10552	10581	10621	10622	10623	10666	10675	10747	10758	10787	10814	10859	10892	10955	10964	11005	11035	11118	11128	11151	11213	11221	11314	11326	11334	22890	22904	22914	22918	22976	22985	23043	23075	23180	23191	23228	23369	23405	23529	23586	23705	24138	25758	25804	25818	25939	25942	26007	26057	26065	26146	26228	26253	26999	27040	27086	27120	27198	27297	27342	27350	28299	28317	28442	28454	28514	28526	28776	28834	28874	28876	28896	28908	28912	28916	28984	29108	29110	29923	29995	30009	50487	50489	50943	51000	51010	51116	51135	51176	51191	51237	51279	51284	51291	51306	51308	51311	51340	51428	51517	51538	51561	51606	51676	51704	51728	51744	53833	53840	54210	54212	54432	54440	54476	54512	54518	54541	54542	54795	54890	55061	55116	55120	55159	55163	55172	55173	55254	55324	55337	55343	55421	55601	55690	55703	55718	55777	55845	55846	55894	55904	56253	56829	56832	56892	56915	56940	57007	57102	57115	57154	57379	57506	57678	57823	59067	60386	60489	63901	63916	64005	64115	64127	64135	64170	64218	64581	79004	79132	79465	79594	79671	80149	80216	80271	80328	80329	80762	81494	81559	81622	81844	83737	84106	84166	84174	84522	84868	85363	89870	90865	91543	91607	92400	94059	94107	114548	114770	114771	114836	115004	117157	117194	117854	118460	124599	127544	130340	133396	135250	139741	140564	146850	147179	148022	148213	148811	149041	149233	149466	154064	159296	161882	163486	163702	163747	164668	165918	171568	196051	200315	200316	200558	201294	202309	203068	246778	255520	256987	259197	282616	282617	282618	283316	284021	285852	338339	338376	339390	339834	340061	353091	377630	387836	387849	390530	401466	414325	439996	440275	440786	644150	653361	728358	729230	100423062	100431172	100507436	100528032	101180976
GO:0002253	GO:ACTIVATION OF IMMUNE RESPONSE	2	25	60	71	100	101	329	330	331	409	466	581	596	629	640	695	708	710	712	713	714	715	716	717	718	719	720	721	722	725	727	728	729	730	731	732	733	735	778	784	785	801	805	808	841	857	868	915	916	917	919	920	929	930	940	942	948	952	966	973	974	998	1072	1147	1191	1236	1326	1378	1380	1385	1386	1387	1398	1432	1445	1493	1508	1513	1514	1520	1535	1540	1604	1675	1755	1793	1845	1846	1848	1849	1997	2002	2033	2150	2207	2209	2212	2214	2219	2220	2268	2353	2533	2534	2625	2633	2672	2822	2867	2885	3055	3071	3075	3078	3113	3115	3117	3118	3119	3120	3122	3123	3125	3126	3127	3146	3265	3303	3304	3320	3326	3329	3384	3385	3426	3428	3493	3494	3495	3497	3500	3501	3502	3503	3507	3514	3537	3538	3539	3542	3543	3551	3553	3635	3654	3656	3659	3661	3662	3665	3684	3689	3702	3708	3709	3710	3725	3783	3845	3848	3929	3932	3937	3958	3984	4057	4067	4153	4179	4205	4208	4214	4277	4332	4615	4620	4641	4651	4690	4772	4773	4775	4790	4791	4792	4793	4795	4893	5058	5062	5063	5074	5142	5144	5170	5199	5245	5289	5290	5291	5293	5295	5296	5335	5336	5338	5359	5528	5530	5532	5534	5566	5567	5568	5579	5580	5581	5583	5588	5594	5595	5598	5599	5600	5601	5602	5604	5606	5608	5609	5621	5627	5641	5648	5663	5664	5682	5683	5684	5685	5686	5687	5688	5689	5690	5691	5692	5693	5694	5695	5696	5698	5699	5700	5701	5702	5704	5705	5706	5707	5708	5709	5710	5711	5713	5714	5715	5716	5717	5718	5719	5720	5721	5728	5747	5771	5777	5788	5795	5879	5894	5970	5971	6195	6196	6197	6233	6397	6416	6500	6714	6794	6850	6885	7006	7070	7096	7097	7098	7099	7100	7105	7128	7184	7187	7189	7294	7301	7311	7314	7316	7321	7322	7323	7334	7335	7408	7409	7410	7430	7448	7454	7456	7462	7525	7535	7867	8013	8398	8454	8517	8547	8631	8685	8737	8767	8772	8915	8935	8945	8976	8993	9020	9039	9040	9252	9261	9402	9404	9447	9473	9491	9564	9572	9641	9698	9840	9844	9861	9865	9971	10006	10010	10062	10092	10093	10094	10095	10096	10097	10109	10163	10197	10211	10213	10318	10333	10392	10451	10454	10458	10552	10616	10666	10695	10747	10787	10892	11035	11119	11213	11314	11326	22914	23098	23118	23180	23191	23198	23228	23291	23369	23586	23643	25865	25942	26007	26057	26065	26191	26228	26253	26999	27040	27242	27342	28299	28317	28442	28454	28526	28577	28639	28755	28776	28834	28874	28876	28896	28908	28912	28916	28984	29085	29108	29110	29979	30835	30849	30968	50852	50856	50943	51135	51279	51284	51311	51324	51517	53347	54106	54900	54923	55061	55072	55366	55601	55740	55824	55845	55914	56829	56940	57115	57161	57162	57181	57402	57506	57590	58484	58509	59338	63916	64005	64127	64135	64170	64581	79132	79155	79671	79931	81035	81494	81622	81793	83416	83737	84174	84433	85363	89857	89870	90268	91543	92747	93978	114609	114770	114771	115004	118788	121665	122706	123920	130120	130132	143471	146206	147179	148022	148823	149041	150372	153090	163486	170482	171389	196051	257144	257397	286430	338339	338382	340061	353376	377630	387357	390530	440786	644150	730249	100423062	100528032
GO:0002260	GO:LYMPHOCYTE HOMEOSTASIS	25	100	207	355	578	581	596	608	778	836	972	1831	3071	3091	3551	3558	3559	3718	3965	4004	4067	4208	4282	5027	5293	5366	5532	5585	5896	6498	6654	6655	6708	6776	6777	7040	7042	7128	8456	8517	8740	8772	8915	9093	9133	9469	10018	10572	10673	11035	11151	23495	27040	29985	30061	50943	54542	55012	57678	57864	84524	84636	115650	124976	149041	202309
GO:0002262	GO:MYELOID CELL HOMEOSTASIS	91	92	103	118	212	272	301	405	558	578	581	604	652	836	1021	1054	1432	1777	2034	2038	2039	2056	2068	2113	2116	2122	2176	2207	2235	2309	2539	2623	2624	2625	3050	3059	3071	3091	3146	3148	3162	3202	3216	3276	3398	3458	3569	3579	3623	3624	3635	3707	3717	3815	4067	4090	4151	4254	4522	4779	4891	5052	5142	5316	5469	5771	5925	5926	6005	6208	6218	6223	6229	6647	6667	6670	6688	6722	6776	6777	6868	6886	6917	7049	7067	7422	7564	8444	8861	9611	9636	9935	9991	10018	10107	10296	10320	10365	10634	10661	22985	23028	23210	23385	23543	28982	28996	29766	29843	50943	51621	54536	54681	54977	55553	55904	57817	60682	83700	84456	93974	94081	129138	161882	338442
GO:0002263	GO:CELL ACTIVATION INVOLVED IN IMMUNE RESPONSE	25	29	100	136	164	301	306	538	602	604	613	911	940	941	942	958	959	1113	1524	1794	1880	2067	2150	2185	2205	2207	2241	2242	2268	2624	2625	2956	3109	3142	3146	3162	3329	3383	3439	3440	3441	3442	3443	3444	3445	3446	3447	3448	3449	3451	3452	3456	3458	3467	3558	3565	3566	3569	3586	3593	3594	3596	3598	3662	3683	3718	3815	3916	3929	3936	3955	3956	3958	3964	3965	3981	4063	4064	4067	4179	4242	4292	4436	4542	4602	4683	4853	5170	5293	5294	5336	5473	5581	5590	5663	5664	5724	5734	5873	5880	5914	5971	6095	6097	6284	6348	6363	6504	6556	6778	6810	6813	6814	6830	6844	6845	6850	7040	7098	7099	7157	7248	7292	7305	7374	7462	7468	7494	7535	8013	8320	8673	8676	8723	8729	8741	8767	8773	8809	8832	8993	8995	9025	9156	9466	9655	9846	9984	10125	10538	10814	10859	11151	11314	22904	22976	23075	23228	23529	26253	27040	27086	27342	28514	29108	30009	50487	50943	51010	51176	51561	51744	54518	54542	55846	56832	56892	57102	57115	57379	64218	64581	80762	84106	84868	114548	114770	114771	114836	117157	117194	118460	148022	149041	149233	159296	161882	163747	165918	200558	201294	202309	246778	282618	284021	338339	338376	440275	729230	100431172
GO:0002274	GO:MYELOID LEUKOCYTE ACTIVATION	29	102	136	199	306	399	566	613	671	814	914	942	951	972	1113	1191	1238	1268	1269	1435	1437	1524	1794	1907	2150	2205	2207	2241	2242	2268	2323	2624	3146	3162	3329	3516	3565	3566	3576	3579	3586	3596	3598	3662	3725	3815	3929	3937	3965	4055	4067	4282	4495	4542	4853	5170	5293	5294	5359	5473	5580	5581	5663	5724	5791	5819	5880	5971	6095	6283	6284	6348	6352	6376	6504	6542	6556	6622	6688	6810	6813	6814	6844	6845	6850	7032	7040	7048	7057	7096	7098	7099	7189	7305	7442	7462	7474	7535	7852	8013	8399	8673	8676	8692	8723	8744	8754	8773	8832	9173	9846	10062	10077	10125	10202	10394	10397	10537	10538	10666	10814	11314	22904	22914	22918	23210	23729	26228	27040	27086	27342	29108	50487	51284	51311	55509	55904	57102	57580	57817	64784	79155	80149	81501	84106	84868	90865	116071	117194	124599	124912	133396	148022	201294	221395	284021	727897	729230	100528032
GO:0002275	GO:MYELOID CELL ACTIVATION INVOLVED IN IMMUNE RESPONSE	29	136	306	613	1113	1524	1794	2150	2205	2207	2241	2242	2268	2624	3146	3162	3565	3566	3596	3598	3815	3929	3965	4067	4542	5170	5293	5294	5473	5581	5724	5880	6284	6348	6504	6810	6813	6814	6844	6845	6850	7098	7305	7462	7535	8013	8673	8676	8723	8773	8832	9846	10125	10814	11314	22904	27040	27342	29108	50487	57102	84106	117194	148022	201294	284021	729230
GO:0002279	GO:MAST CELL ACTIVATION INVOLVED IN IMMUNE RESPONSE	136	1113	2205	2207	2241	2242	2268	2624	3162	3565	3566	3596	3598	3815	3965	4067	5170	5293	5294	5880	6284	6813	6845	6850	7462	7535	8013	8673	8723	8773	8832	9846	10125	10814	11314	27040	27342	50487	57102	117194	201294	284021
GO:0002285	GO:LYMPHOCYTE ACTIVATION INVOLVED IN IMMUNE RESPONSE	25	100	164	301	538	602	604	911	940	941	942	958	959	1880	2067	2150	2185	2207	2625	2956	3109	3142	3146	3329	3383	3439	3440	3441	3442	3443	3444	3445	3446	3447	3448	3449	3451	3452	3456	3458	3467	3558	3565	3566	3569	3586	3593	3594	3662	3683	3718	3916	3936	3955	3956	3958	3964	3965	3981	4063	4064	4179	4242	4292	4436	4602	4683	4853	5336	5590	5663	5664	5734	5873	5914	5971	6095	6097	6363	6556	6778	6830	6845	7040	7099	7157	7248	7292	7374	7468	7494	8320	8676	8741	8767	8809	8993	8995	9025	9156	9466	9655	9984	10538	10859	11151	22976	23075	23228	23529	26253	27086	28514	30009	50943	51010	51176	51561	51744	54518	54542	55846	56832	57115	57379	64218	80762	84868	114548	114770	114771	114836	118460	149041	149233	159296	161882	163747	165918	200558	201294	202309	246778	282618	338339	338376	440275	100431172
GO:0002286	GO:T CELL ACTIVATION INVOLVED IN IMMUNE RESPONSE	301	538	602	604	911	941	942	2150	2207	2625	3109	3142	3146	3383	3439	3440	3441	3442	3443	3444	3445	3446	3447	3448	3449	3451	3452	3456	3458	3467	3565	3566	3569	3593	3594	3662	3683	3718	3936	3958	3965	4063	4179	4602	5590	5663	5664	5734	5873	5914	5971	6095	6097	6363	6556	6778	7157	7248	7292	8320	8676	8767	8809	8995	9655	10538	10859	26253	27086	50943	51176	51561	54518	54542	56832	64218	84868	114548	114836	149041	149233	161882	163747	246778	282618	338339	338376	440275
GO:0002287	GO:ALPHA-BETA T CELL ACTIVATION INVOLVED IN IMMUNE RESPONSE	301	538	602	604	941	942	2625	3142	3146	3458	3565	3566	3569	3593	3594	3662	3718	3965	4063	4602	5590	5734	5914	5971	6095	6097	6363	6778	7292	8320	8767	8809	8995	9655	10538	27086	50943	51176	51561	54542	64218	114548	114836	149041	149233	161882	246778
GO:0002292	GO:T CELL DIFFERENTIATION INVOLVED IN IMMUNE RESPONSE	301	538	602	604	941	942	2207	2625	3142	3146	3458	3565	3566	3569	3593	3594	3662	3718	3965	4063	4179	4602	5590	5734	5914	5971	6095	6097	6363	6778	7248	7292	8320	8767	8809	8995	9655	10538	26253	27086	50943	51176	51561	54542	64218	114548	114836	149041	149233	161882	163747	246778	282618	338339
GO:0002293	GO:ALPHA-BETA T CELL DIFFERENTIATION INVOLVED IN IMMUNE RESPONSE	301	538	602	604	941	942	2625	3142	3146	3458	3565	3566	3569	3593	3594	3662	3718	3965	4063	4602	5590	5734	5914	5971	6095	6097	6363	6778	7292	8320	8767	8809	8995	9655	10538	27086	50943	51176	51561	54542	64218	114548	114836	149041	149233	161882	246778
GO:0002294	GO:CD4-POSITIVE, ALPHA-BETA T CELL DIFFERENTIATION INVOLVED IN IMMUNE RESPONSE	301	538	602	604	941	942	2625	3142	3146	3458	3565	3566	3569	3593	3594	3662	3718	3965	4063	4602	5590	5734	5914	5971	6095	6097	6363	6778	7292	8767	8809	8995	9655	10538	27086	50943	51176	51561	54542	64218	114548	114836	149041	149233	161882	246778
GO:0002312	GO:B CELL ACTIVATION INVOLVED IN IMMUNE RESPONSE	25	100	602	604	940	958	959	1880	2067	2185	2956	3329	3456	3458	3558	3565	3586	3955	3956	3964	3981	4064	4242	4292	4436	4683	4853	5336	6778	6830	7040	7099	7292	7374	7468	7494	8741	9025	9156	9466	9984	10538	22976	23075	23228	23529	28514	30009	50943	51010	55846	57379	80762	118460	159296	165918	200558	202309
GO:0002320	GO:LYMPHOID PROGENITOR CELL DIFFERENTIATION	596	652	2322	2625	3280	3815	3981	4851	5591	6469	6654	6655	6659	6688	10538	22890	96459	201163	388585
GO:0002323	GO:NATURAL KILLER CELL ACTIVATION INVOLVED IN IMMUNE RESPONSE	164	3439	3440	3441	3442	3443	3444	3445	3446	3447	3448	3449	3451	3452	3456	3467	3593	3916	5873	6845	8676	8993	11151	51744	56832	57115	114770	114771	201294	338376	100431172
GO:0002335	GO:MATURE B CELL DIFFERENTIATION	100	602	1880	2185	3955	3956	3964	4242	4853	5336	5452	7494	10892	23228	28514	55846	112616	159296
GO:0002347	GO:RESPONSE TO TUMOR CELL	3146	3176	3273	3329	3592	3593	5551	5817	5819	10628	10666	22914	56253	126520	259197	100507436	100528032
GO:0002360	GO:T CELL LINEAGE COMMITMENT	596	3565	3569	3574	3593	3594	3662	4063	5591	5897	6469	6778	7157	8456	8995	10538	50943	51561	114836	149233	161882
GO:0002366	GO:LEUKOCYTE ACTIVATION INVOLVED IN IMMUNE RESPONSE	25	29	100	136	164	301	306	538	602	604	613	911	940	941	942	958	959	1113	1524	1794	1880	2067	2150	2185	2205	2207	2241	2242	2268	2624	2625	2956	3109	3142	3146	3162	3329	3383	3439	3440	3441	3442	3443	3444	3445	3446	3447	3448	3449	3451	3452	3456	3458	3467	3558	3565	3566	3569	3586	3593	3594	3596	3598	3662	3683	3718	3815	3916	3929	3936	3955	3956	3958	3964	3965	3981	4063	4064	4067	4179	4242	4292	4436	4542	4602	4683	4853	5170	5293	5294	5336	5473	5581	5590	5663	5664	5724	5734	5873	5880	5914	5971	6095	6097	6284	6348	6363	6504	6556	6778	6810	6813	6814	6830	6844	6845	6850	7040	7098	7099	7157	7248	7292	7305	7374	7462	7468	7494	7535	8013	8320	8673	8676	8723	8741	8767	8773	8809	8832	8993	8995	9025	9156	9466	9655	9846	9984	10125	10538	10814	10859	11151	11314	22904	22976	23075	23228	23529	26253	27040	27086	27342	28514	29108	30009	50487	50943	51010	51176	51561	51744	54518	54542	55846	56832	57102	57115	57379	64218	64581	80762	84106	84868	114548	114770	114771	114836	117157	117194	118460	148022	149041	149233	159296	161882	163747	165918	200558	201294	202309	246778	282618	284021	338339	338376	440275	729230	100431172
GO:0002367	GO:CYTOKINE PRODUCTION INVOLVED IN IMMUNE RESPONSE	284	335	336	567	604	684	695	948	972	1113	1178	1604	1739	2150	2207	2621	2865	2867	3077	3105	3140	3162	3329	3440	3456	3565	3586	3718	3815	4282	5590	6375	6556	6885	7010	7040	7042	7043	7097	7098	7099	7124	7186	7189	7292	7474	7855	8013	8482	8764	8915	9474	9865	10417	10859	10892	11213	50943	51704	54210	54440	54795	59067	64115	64127	79004	91543	114548	117854	133396	163486
GO:0002369	GO:T CELL CYTOKINE PRODUCTION	567	1178	1604	1739	3077	3105	3440	3456	3565	5590	6375	6556	6885	7186	7189	7292	7855	10892	50943	54440	54795	64115	91543	114548	133396	163486
GO:0002377	GO:IMMUNOGLOBULIN PRODUCTION	355	604	940	951	958	959	2067	2590	2956	3119	3123	3125	3126	3127	3133	3263	3329	3458	3558	3565	3566	3567	3569	3575	3586	3596	3598	3981	4292	4436	4437	4683	5379	5383	5395	5423	5452	5585	5591	5788	5950	6375	6778	6810	6830	6929	7009	7040	7124	7186	7189	7292	7293	7374	7441	7468	7494	8741	9025	9156	9245	9466	9984	10538	10673	10721	10758	22976	23075	23529	27343	27434	28299	28908	29802	30009	50943	51010	51237	54440	54900	56259	57379	64127	80762	90865	118460	126259	165918	200558	202309	389643	107161145
GO:0002381	GO:IMMUNOGLOBULIN PRODUCTION INVOLVED IN IMMUNOGLOBULIN MEDIATED IMMUNE RESPONSE	604	940	958	959	2067	2956	3119	3123	3125	3126	3127	3329	3458	3558	3565	3586	3981	4292	4436	4683	5452	6375	6778	6830	7040	7292	7374	7468	8741	9025	9156	9245	9466	9984	10538	22976	23075	23529	30009	50943	51010	57379	64127	80762	118460	165918	200558	202309
GO:0002385	GO:MUCOSAL IMMUNE RESPONSE	337	820	1667	1668	1672	2197	2865	2867	3565	4057	4843	5284	5319	6037	6170	6375	8339	8343	8344	8346	8347	8349	8741	8970	9245	54145	56957	64127	64284	85236	92747	163702	282616	728358
GO:0002407	GO:DENDRITIC CELL CHEMOTAXIS	708	811	1230	1234	1235	1236	2621	3146	3577	3579	3592	3965	5294	6352	6363	6366	7852	7984	8995	54795	196527	729230
GO:0002429	GO:IMMUNE RESPONSE-ACTIVATING CELL SURFACE RECEPTOR SIGNALING PATHWAY	25	60	71	100	581	596	640	695	719	728	778	784	785	801	805	808	841	868	915	916	917	919	920	930	940	952	973	974	998	1072	1147	1236	1378	1380	1387	1398	1445	1493	1793	1845	1997	2033	2207	2209	2212	2214	2219	2268	2533	2534	2625	2633	2822	2867	2885	3055	3071	3113	3115	3117	3118	3119	3120	3122	3123	3125	3126	3127	3265	3320	3326	3384	3385	3493	3494	3495	3497	3500	3501	3502	3503	3507	3514	3537	3538	3539	3542	3543	3551	3553	3635	3702	3708	3709	3710	3783	3845	3932	3937	3958	3984	4067	4208	4277	4332	4620	4641	4651	4690	4772	4773	4775	4790	4791	4792	4893	5058	5062	5063	5074	5142	5144	5170	5290	5291	5293	5295	5296	5335	5336	5338	5359	5530	5532	5534	5566	5567	5568	5579	5580	5581	5583	5588	5594	5595	5621	5663	5664	5682	5683	5684	5685	5686	5687	5688	5689	5690	5691	5692	5693	5694	5695	5696	5698	5699	5700	5701	5702	5704	5705	5706	5707	5708	5709	5710	5711	5713	5714	5715	5716	5717	5718	5719	5720	5721	5728	5747	5771	5777	5788	5795	5879	5894	5970	5971	6233	6500	6714	6794	6850	6885	7006	7070	7097	7189	7294	7311	7314	7316	7321	7322	7334	7335	7408	7409	7410	7430	7454	7456	7462	7525	7535	8013	8398	8454	8517	8631	8767	8915	8945	8976	9020	9039	9040	9252	9402	9404	9473	9491	9564	9840	9844	9861	10006	10092	10093	10094	10095	10096	10097	10109	10163	10197	10213	10451	10454	10458	10552	10616	10666	10787	10892	11119	11314	22914	23118	23180	23191	23198	23228	23291	25865	26191	26228	26253	26999	27040	27242	27342	28299	28317	28442	28454	28526	28577	28639	28755	28776	28834	28874	28876	28896	28908	28912	28916	29085	29108	30835	30968	50852	50856	50943	51324	51517	53347	54900	54923	55072	55740	55824	55845	56940	57181	59338	63916	64005	64170	64581	83416	84174	84433	89857	93978	121665	122706	123920	130132	143471	146206	147179	148823	149041	150372	163486	170482	196051	257144	257397	338339	387357	390530	440786	644150	100423062	100528032
GO:0002431	GO:FC RECEPTOR MEDIATED STIMULATORY SIGNALING PATHWAY	25	60	71	917	919	998	1072	1398	1445	1793	2207	2209	2212	2214	2268	2534	2885	3055	3071	3320	3326	3500	3501	3502	3503	3514	3537	3538	3539	3542	3708	3709	3710	3984	4067	4620	4641	4651	4690	5058	5290	5291	5295	5296	5335	5336	5338	5359	5580	5581	5594	5595	5747	5879	6714	6850	7409	7410	7454	7456	7525	8013	8398	8976	9844	10006	10092	10093	10094	10095	10096	10097	10109	10163	10451	10458	10552	10666	10787	23191	26999	27342	28299	28442	28454	28776	28834	28874	28876	28896	28908	28912	28916	51517	55845	63916	64005	147179	196051	440786	644150
GO:0002433	GO:IMMUNE RESPONSE-REGULATING CELL SURFACE RECEPTOR SIGNALING PATHWAY INVOLVED IN PHAGOCYTOSIS	25	60	71	917	919	998	1072	1398	1793	2209	2212	2214	2268	2534	2885	3055	3071	3320	3326	3500	3501	3502	3503	3514	3537	3538	3539	3542	3708	3709	3710	3984	4067	4620	4641	4651	4690	5058	5290	5291	5295	5296	5335	5336	5338	5580	5581	5594	5595	5747	5879	6714	6850	7409	7410	7454	7456	7525	8398	8976	9844	10006	10092	10093	10094	10095	10096	10097	10109	10163	10451	10458	10552	10787	23191	26999	28299	28442	28454	28776	28834	28874	28876	28896	28908	28912	28916	51517	55845	63916	64005	147179	196051	440786	644150
GO:0002437	GO:INFLAMMATORY RESPONSE TO ANTIGENIC STIMULUS	116	191	624	718	923	940	1236	1268	1991	2205	2207	2625	2876	3123	3125	3126	3127	3146	3148	3383	3516	3552	3553	3557	3559	3568	3579	3586	3593	4049	4851	4853	4988	5692	6693	7124	7784	8620	9240	10125	23135	26525	27177	27178	27179	53833	55829	56300	64127	64806	84639	122481	133396	171389	729230
GO:0002438	GO:ACUTE INFLAMMATORY RESPONSE TO ANTIGENIC STIMULUS	116	624	718	923	1236	1268	1991	2205	2207	2625	3383	3579	4988	6693	7784	8620	53833	55829	133396
GO:0002440	GO:PRODUCTION OF MOLECULAR MEDIATOR OF IMMUNE RESPONSE	284	335	336	354	355	567	604	684	695	940	948	951	958	959	972	1113	1178	1604	1739	2067	2150	2207	2590	2621	2865	2867	2956	3077	3105	3119	3123	3125	3126	3127	3133	3140	3162	3263	3329	3440	3456	3458	3558	3565	3566	3567	3569	3575	3586	3596	3598	3718	3815	3981	4282	4292	4316	4436	4437	4683	5225	5379	5383	5395	5423	5452	5585	5590	5591	5650	5788	5950	6375	6556	6778	6810	6830	6885	6929	7009	7010	7040	7042	7043	7097	7098	7099	7124	7186	7189	7292	7293	7374	7441	7468	7474	7494	7855	8013	8482	8741	8764	8915	9025	9156	9245	9466	9474	9865	9984	10417	10538	10673	10721	10758	10859	10892	11005	11213	22976	23075	23529	25818	27343	27434	28299	28908	29802	30009	50943	51010	51237	51704	51744	54210	54440	54795	54900	55894	56259	57379	59067	64115	64127	79004	80762	90865	91543	114548	117854	118460	126259	133396	163486	165918	200558	202309	389643	414325	107161145
GO:0002443	GO:LEUKOCYTE MEDIATED IMMUNITY	29	136	164	177	182	306	355	409	566	567	602	604	613	684	695	708	710	712	713	714	715	716	717	718	720	721	722	725	727	729	730	731	732	733	735	925	939	940	958	959	972	1054	1075	1113	1130	1178	1191	1378	1380	1511	1512	1604	1621	1636	1739	1991	2013	2067	2150	2205	2207	2208	2241	2242	2268	2302	2624	2625	2794	2956	3002	3077	3105	3106	3108	3119	3123	3125	3126	3127	3133	3146	3162	3263	3329	3383	3426	3440	3456	3458	3481	3493	3494	3495	3497	3500	3501	3502	3503	3507	3514	3537	3538	3539	3542	3543	3553	3558	3565	3566	3569	3570	3575	3586	3592	3593	3594	3596	3598	3635	3665	3718	3811	3815	3822	3824	3902	3916	3952	3965	3981	4049	4067	4068	4153	4179	4277	4292	4436	4542	4683	4843	5027	5052	5170	5272	5293	5294	5319	5452	5473	5532	5580	5590	5724	5777	5788	5817	5819	5873	5880	6284	6318	6347	6348	6375	6556	6693	6776	6777	6778	6810	6813	6814	6830	6844	6845	6850	6868	6885	6890	7040	7097	7098	7099	7124	7186	7189	7292	7374	7409	7454	7462	7468	7535	7784	7855	8013	8284	8417	8673	8676	8723	8741	8772	8773	8832	8915	9025	9156	9245	9437	9466	9846	9984	10125	10383	10384	10417	10538	10666	10747	10814	10859	10892	11035	11118	11151	11314	11334	22890	22914	22976	23075	23180	23529	23705	26228	27040	27342	28299	28317	28442	28454	28526	28776	28834	28874	28876	28896	28908	28912	28916	30009	50487	50943	51010	51135	51279	51311	51561	53833	54210	54440	54795	55061	55904	56253	56940	57102	57379	57823	59067	64005	64115	64127	79465	80328	80329	80762	84106	84174	84522	91543	114548	114836	117157	117194	118460	124599	127544	133396	135250	146850	149233	154064	163486	165918	200558	201294	202309	203068	259197	284021	285852	339390	353091	387836	390530	440786	653361	729230	100423062	100431172	100507436	100528032
GO:0002444	GO:MYELOID LEUKOCYTE MEDIATED IMMUNITY	29	136	306	566	613	718	1113	1130	1511	1636	1991	2150	2205	2207	2241	2242	2268	2624	3162	3565	3566	3569	3570	3596	3598	3815	3965	4067	4542	5170	5272	5293	5294	5319	5473	5724	5880	6284	6348	6810	6813	6814	6844	6845	6850	6868	7462	7535	8013	8673	8676	8723	8773	8832	9846	10125	10417	10814	11314	11334	26228	27040	27342	50487	51135	54210	55904	57102	84106	84522	117194	124599	201294	284021	653361	729230
GO:0002446	GO:NEUTROPHIL MEDIATED IMMUNITY	29	306	566	613	1130	1511	1636	1991	2150	3569	3570	4542	5319	5473	5724	6813	6814	6845	6850	6868	8676	11334	51135	54210	55904	84106	84522	124599	653361
GO:0002448	GO:MAST CELL MEDIATED IMMUNITY	136	1113	2205	2207	2241	2242	2268	2624	3162	3565	3566	3596	3598	3815	3965	4067	5170	5272	5293	5294	5880	6284	6813	6845	6850	7462	7535	8013	8673	8723	8773	8832	9846	10125	10417	10814	11314	27040	27342	50487	57102	117194	201294	284021
GO:0002449	GO:LYMPHOCYTE MEDIATED IMMUNITY	164	177	182	355	409	567	602	604	695	708	710	712	713	714	715	716	717	718	720	721	722	725	727	729	730	731	732	733	735	925	939	940	958	959	972	1054	1075	1130	1178	1191	1378	1380	1512	1604	1739	2013	2067	2205	2207	2208	2302	2625	2794	2956	3002	3077	3105	3106	3108	3119	3123	3125	3126	3127	3133	3146	3263	3329	3383	3426	3440	3456	3458	3481	3493	3494	3495	3497	3500	3501	3502	3503	3507	3514	3537	3538	3539	3542	3543	3553	3558	3565	3566	3575	3586	3592	3593	3594	3598	3635	3665	3811	3822	3824	3902	3916	3952	3965	3981	4049	4068	4153	4179	4277	4292	4436	4683	5027	5052	5272	5452	5532	5580	5590	5777	5788	5817	5819	5873	6318	6375	6556	6693	6776	6777	6778	6830	6845	6885	6890	7040	7124	7186	7189	7292	7374	7409	7454	7468	7784	7855	8284	8417	8676	8741	8772	8915	9025	9156	9245	9437	9466	9984	10125	10383	10384	10538	10666	10747	10859	10892	11035	11118	11151	22890	22914	22976	23075	23180	23529	23705	28299	28317	28442	28454	28526	28776	28834	28874	28876	28896	28908	28912	28916	30009	50943	51010	51279	51311	51561	53833	54440	54795	55061	56253	56940	57379	57823	59067	64005	64115	64127	79465	80328	80329	80762	84174	91543	114548	114836	117157	118460	127544	133396	135250	146850	149233	154064	163486	165918	200558	201294	202309	203068	259197	285852	339390	353091	387836	390530	440786	100423062	100431172	100507436	100528032
GO:0002455	GO:HUMORAL IMMUNE RESPONSE MEDIATED BY CIRCULATING IMMUNOGLOBULIN	602	708	710	712	713	714	715	716	717	718	720	721	722	725	727	729	730	731	732	733	735	1191	1378	1380	1604	2208	2302	3119	3123	3125	3126	3127	3263	3426	3493	3494	3495	3497	3500	3501	3502	3503	3507	3514	3537	3538	3539	3542	3543	4049	4153	4179	5777	7124	7784	9156	10747	28299	28317	28442	28454	28526	28776	28834	28874	28876	28896	28908	28912	28916	51279	55061	64127	390530	440786	100423062
GO:0002456	GO:T CELL MEDIATED IMMUNITY	177	182	567	925	1075	1130	1178	1512	1604	1739	2013	2625	2794	3002	3077	3105	3106	3133	3146	3329	3383	3440	3456	3553	3565	3575	3592	3593	3594	4179	4277	5027	5532	5590	5788	5817	5819	5873	6375	6556	6693	6885	7186	7189	7292	7454	7784	7855	8284	8417	8676	8772	10384	10859	10892	11035	11118	22890	23180	50943	51561	53833	54440	54795	56940	64005	64115	64127	91543	114548	133396	135250	149233	163486	259197	285852	339390	100507436
GO:0002460	GO:ADAPTIVE IMMUNE RESPONSE BASED ON SOMATIC RECOMBINATION OF IMMUNE RECEPTORS BUILT FROM IMMUNOGLOBULIN SUPERFAMILY DOMAINS	100	177	182	301	355	567	602	604	695	708	710	712	713	714	715	716	717	718	719	720	721	722	725	727	729	730	731	732	733	735	920	925	939	940	941	958	959	972	1075	1130	1178	1191	1378	1380	1512	1604	1739	2013	2067	2205	2207	2208	2302	2625	2794	2956	3002	3077	3105	3106	3108	3119	3123	3125	3126	3127	3133	3142	3146	3263	3329	3383	3426	3440	3456	3458	3493	3494	3495	3497	3500	3501	3502	3503	3507	3514	3537	3538	3539	3542	3543	3553	3558	3565	3566	3569	3575	3586	3592	3593	3594	3598	3606	3635	3662	3665	3718	3981	4049	4063	4153	4179	4208	4277	4292	4436	4683	4791	5027	5452	5532	5580	5585	5588	5590	5777	5788	5817	5819	5873	5971	6095	6097	6363	6375	6556	6693	6778	6830	6868	6885	7040	7099	7124	7128	7186	7189	7292	7374	7454	7468	7784	7855	8284	8417	8676	8741	8767	8772	8809	8915	8995	9025	9156	9173	9245	9466	9655	9984	10068	10148	10333	10384	10538	10563	10666	10673	10747	10859	10892	11035	11118	22890	22976	23075	23180	23529	28299	28317	28442	28454	28526	28776	28834	28874	28876	28896	28908	28912	28916	30009	50943	51010	51176	51279	51311	51561	53833	54440	54795	55061	56940	57379	64005	64115	64127	64218	80762	84174	89857	90865	91543	114548	114836	115650	118460	133396	135250	149041	149233	163486	165918	200558	201294	202309	246778	259197	285852	338322	339390	390530	440786	729230	100423062	100507436
GO:0002467	GO:GERMINAL CENTER FORMATION	100	602	604	2302	4208	4791	5585	6868	7128	8741	10563	10673	89857	115650	149041	201294
GO:0002474	GO:ANTIGEN PROCESSING AND PRESENTATION OF PEPTIDE ANTIGEN VIA MHC CLASS I	563	567	642	811	821	948	1520	1535	1536	1636	2207	2209	2210	2923	3077	3105	3106	3107	3133	3134	3135	3136	3140	3685	3693	4012	4688	4689	5243	5244	5682	5683	5684	5685	5686	5687	5688	5689	5690	5691	5692	5693	5694	5695	5696	5698	5699	5700	5701	5702	5704	5705	5706	5707	5708	5709	5710	5711	5713	5714	5715	5716	5717	5718	5719	5720	5721	6233	6396	6890	6891	6892	7174	7311	7314	7316	7319	9491	9520	9632	9861	9871	10134	10197	10213	10427	10437	10484	10802	10952	22872	23198	23457	23480	29927	50489	51128	51752	55080	55176	64167	122706	143471	340273	653361
GO:0002478	GO:ANTIGEN PROCESSING AND PRESENTATION OF EXOGENOUS PEPTIDE ANTIGEN	160	161	162	163	164	375	567	811	821	948	972	1062	1173	1174	1175	1211	1213	1509	1510	1514	1515	1520	1535	1536	1639	1778	1780	1781	1783	1785	2207	2209	2210	2923	3105	3106	3107	3108	3109	3111	3112	3113	3115	3117	3118	3119	3120	3122	3123	3125	3126	3127	3133	3134	3135	3685	3693	3796	3797	3798	3831	3832	3835	4012	4688	4689	5243	5244	5641	5682	5683	5684	5685	5686	5687	5688	5689	5690	5691	5692	5693	5694	5695	5696	5698	5699	5700	5701	5702	5704	5705	5706	5707	5708	5709	5710	5711	5713	5714	5715	5716	5717	5718	5719	5720	5721	6233	6396	6456	6712	6890	6891	6892	7189	7311	7314	7316	7879	8655	8722	8905	8907	9371	9491	9493	9632	9861	9871	10053	10120	10121	10197	10213	10427	10437	10484	10540	10671	10802	10952	11004	11127	11258	22872	22920	23198	23457	23480	24137	26153	29127	29927	50489	51128	51164	51626	55176	56992	64837	79659	81622	81930	83547	84516	84643	114876	122706	130340	140735	143471	285643	340273	653361
GO:0002479	GO:ANTIGEN PROCESSING AND PRESENTATION OF EXOGENOUS PEPTIDE ANTIGEN VIA MHC CLASS I, TAP-DEPENDENT	567	811	948	1535	1536	2209	2210	2923	3105	3106	3107	3133	3134	3135	3685	3693	4688	4689	5682	5683	5684	5685	5686	5687	5688	5689	5690	5691	5692	5693	5694	5695	5696	5698	5699	5700	5701	5702	5704	5705	5706	5707	5708	5709	5710	5711	5713	5714	5715	5716	5717	5718	5719	5720	5721	6233	6890	6891	6892	7311	7314	7316	9491	9861	10197	10213	10952	23198	23480	29927	50489	55176	122706	143471	653361
GO:0002495	GO:ANTIGEN PROCESSING AND PRESENTATION OF PEPTIDE ANTIGEN VIA MHC CLASS II	160	161	162	163	164	375	821	972	1062	1173	1174	1175	1211	1213	1509	1510	1514	1515	1520	1639	1778	1780	1781	1783	1785	2207	3108	3109	3111	3112	3113	3115	3117	3118	3119	3120	3122	3123	3125	3126	3127	3796	3797	3798	3831	3832	3835	5641	6396	6456	6712	7189	7879	8655	8722	8905	8907	9371	9493	9632	9871	10053	10120	10121	10427	10437	10484	10540	10671	10802	11004	11127	11258	22872	22920	24137	26153	29108	29127	51128	51164	51626	54209	55016	56992	64837	79659	81622	81930	83547	84516	84643	114876	130340	140735	220972	285643
GO:0002504	GO:ANTIGEN PROCESSING AND PRESENTATION OF PEPTIDE OR POLYSACCHARIDE ANTIGEN VIA MHC CLASS II	160	161	162	163	164	375	821	972	1062	1173	1174	1175	1211	1213	1509	1510	1514	1515	1520	1639	1778	1780	1781	1783	1785	2207	3108	3109	3111	3112	3113	3115	3117	3118	3119	3120	3122	3123	3125	3126	3127	3796	3797	3798	3831	3832	3835	5641	6396	6456	6712	7057	7189	7879	8655	8722	8905	8907	9371	9493	9632	9871	10053	10120	10121	10427	10437	10484	10540	10671	10802	11004	11127	11258	22872	22920	24137	26153	29108	29127	51128	51164	51626	54209	55016	56992	64837	79659	81622	81930	83547	84516	84643	114876	130340	140735	220972	285643
GO:0002507	GO:TOLERANCE INDUCTION	718	719	868	916	942	1178	1233	2302	3106	3135	3146	3559	3620	3965	4067	5133	7040	7048	7128	10288	11213	23239	29851	50943	64844	83737	84868	730249
GO:0002521	GO:LEUKOCYTE DIFFERENTIATION	25	27	54	100	101	142	177	301	302	324	325	355	399	472	537	538	558	567	572	578	581	596	602	604	632	639	652	660	673	677	678	695	714	760	796	814	841	843	860	861	863	865	912	914	915	916	920	925	939	940	941	942	944	959	972	973	998	1021	1029	1050	1051	1053	1054	1147	1209	1230	1236	1316	1380	1385	1432	1435	1436	1437	1440	1493	1499	1540	1794	1840	1880	1943	1958	1960	1969	2033	2064	2101	2150	2185	2207	2302	2322	2323	2353	2475	2488	2492	2529	2621	2623	2624	2625	2719	2736	2737	2739	2778	3059	3071	3087	3106	3108	3111	3135	3142	3146	3175	3204	3398	3428	3439	3440	3441	3442	3443	3444	3445	3446	3447	3448	3449	3451	3452	3456	3458	3467	3516	3549	3553	3558	3559	3562	3565	3566	3567	3569	3574	3575	3586	3589	3592	3593	3594	3600	3605	3623	3624	3635	3659	3662	3665	3676	3688	3702	3707	3714	3718	3725	3726	3815	3932	3952	3953	3955	3956	3964	3965	3976	3981	4055	4057	4063	4066	4067	4179	4208	4242	4254	4286	4318	4323	4436	4495	4602	4609	4627	4763	4775	4830	4853	4860	4914	5048	5075	5138	5153	5196	5293	5295	5316	5336	5449	5452	5468	5469	5532	5578	5590	5591	5657	5663	5664	5734	5771	5777	5788	5896	5897	5914	5925	5971	6095	6097	6146	6237	6304	6348	6352	6363	6422	6469	6647	6654	6655	6659	6670	6688	6693	6714	6722	6776	6777	6778	6794	6850	6868	6886	6929	6932	6935	7030	7037	7040	7048	7071	7098	7099	7124	7157	7163	7189	7248	7292	7294	7301	7305	7412	7422	7471	7494	7535	7704	7855	8111	8320	8324	8325	8326	8451	8456	8473	8544	8546	8563	8581	8600	8737	8744	8767	8772	8792	8808	8809	8821	8876	8943	8993	8995	9092	9093	9290	9308	9370	9398	9580	9607	9611	9644	9655	9730	9734	9759	9770	9840	9846	9855	9935	10014	10100	10125	10193	10202	10205	10221	10234	10272	10288	10320	10456	10461	10537	10538	10766	10859	10892	11005	11006	11025	11035	11334	22806	22890	22904	22985	23028	23210	23228	23240	23529	23598	25793	25831	26191	26253	26279	27086	27102	27166	27177	27434	28514	28959	28962	29760	29887	30009	50488	50604	50943	51043	51176	51341	51561	53335	54209	54361	54440	54542	54567	54997	55012	55252	55365	55509	55636	55795	55846	55904	56262	56832	56975	56998	57115	57379	57580	57864	59067	63976	64218	64343	64421	64806	64919	79576	79705	79840	80762	81501	84293	84433	84456	84522	84524	84807	84959	91543	96459	112616	114548	114770	114771	114836	116071	128506	130733	133396	133522	135228	139716	140685	146206	146433	146850	149041	149233	150372	159296	161882	163747	169200	170575	171392	222487	246778	257101	282618	284266	286410	338339	338376	387357	441478
GO:0002526	GO:ACUTE INFLAMMATORY RESPONSE	2	12	90	101	116	134	150	197	240	325	336	445	624	629	708	710	717	718	720	721	722	725	727	729	730	731	732	733	735	923	966	1051	1236	1268	1378	1401	1604	1672	1910	1991	2056	2147	2152	2157	2161	2205	2207	2243	2335	2625	2683	2865	2867	2950	3075	3077	3091	3190	3240	3383	3426	3552	3553	3557	3565	3569	3570	3572	3579	3630	3700	3818	3929	4153	4179	4889	4968	4988	5004	5005	5008	5068	5199	5245	5265	5294	5321	5345	5359	5468	5547	5627	5648	5733	5743	6279	6288	6289	6291	6352	6693	6774	6777	6863	6869	7037	7124	7292	7412	7442	7448	7784	8600	8620	8792	8876	9180	9332	9536	23780	25807	26471	27102	50616	53833	54658	55061	55829	55870	56998	59307	84699	91807	114548	130120	133396	196527	259249	729230
GO:0002532	GO:PRODUCTION OF MOLECULAR MEDIATOR INVOLVED IN INFLAMMATORY RESPONSE	240	347	923	1432	2207	3566	3605	3620	3630	3929	3952	4067	4210	4843	5023	5054	5187	6223	6542	6845	6850	7099	8673	8723	8773	11221	23765	27159	27190	64127	66005	79004	80149	81929	84818	112744	115362
GO:0002534	GO:CYTOKINE PRODUCTION INVOLVED IN INFLAMMATORY RESPONSE	347	923	1432	3605	3620	3952	4210	4843	5187	23765	27190	64127	66005	79004	80149	81929	84818	112744	115362
GO:0002544	GO:CHRONIC INFLAMMATORY RESPONSE	136	191	820	1051	1524	1588	2697	3553	3565	3586	3620	4049	6279	6352	6356	7057	7124	7128	7412	8876	9536	10563	50943	201294
GO:0002548	GO:MONOCYTE CHEMOTAXIS	199	301	796	1230	2321	3146	3569	3570	3627	3958	4067	4650	4681	4856	5054	5155	5800	6223	6278	6283	6346	6347	6348	6349	6351	6352	6354	6355	6356	6357	6358	6359	6360	6361	6362	6363	6364	6366	6367	6368	6369	6370	6375	6376	6387	6846	7941	8600	8792	8995	9353	10344	10488	26585	57402	196527	388372	414062	729230
GO:0002562	GO:SOMATIC DIVERSIFICATION OF IMMUNE RECEPTORS VIA GERMLINE RECOMBINATION WITHIN A SINGLE LOCUS	472	604	940	958	959	2067	2956	3146	3148	3329	3458	3558	3565	3586	3981	4292	4436	4437	4683	5395	5423	5591	5896	5897	6778	6830	6929	6932	7040	7292	7374	7468	8741	9025	9156	9466	9730	9984	10538	22976	23075	23529	30009	50943	51010	51176	57379	64421	64919	80762	118460	165918	200558
GO:0002566	GO:SOMATIC DIVERSIFICATION OF IMMUNE RECEPTORS VIA SOMATIC MUTATION	103	2956	4292	4436	5379	5383	5395	5423	7374	9156	10721	27343	27434	57379	389643	107161145
GO:0002573	GO:MYELOID LEUKOCYTE DIFFERENTIATION	54	142	302	324	325	537	632	652	714	760	796	814	841	843	861	863	942	998	1050	1051	1053	1147	1230	1236	1385	1432	1435	1436	1437	1440	1499	1943	1969	2101	2150	2353	2475	2488	2492	2623	2624	2625	2719	2739	2778	3059	3087	3204	3398	3428	3458	3516	3562	3565	3567	3593	3605	3623	3624	3635	3662	3665	3725	3726	3815	3976	4055	4057	4067	4208	4254	4286	4318	4495	4609	4627	4763	4830	4853	5048	5138	5153	5196	5293	5295	5468	5469	5578	5657	5663	5664	5771	5914	5925	5971	6348	6352	6363	6422	6670	6688	6714	6776	6886	7030	7037	7040	7048	7071	7098	7099	7124	7189	7305	7422	8111	8451	8473	8544	8563	8600	8737	8744	8772	8792	8821	9290	9370	9398	9607	9644	9770	9846	9855	9935	10100	10202	10221	10234	10272	10320	10456	10537	10538	10766	10859	11006	11025	22904	22985	23028	27086	27102	28962	29887	50604	51176	51341	51561	54997	55252	55509	55904	56975	56998	63976	64806	79576	79705	80762	81501	84293	84456	84522	84959	116071	128506	130733	133396	133522	135228	139716	140685	146433	149233	159296	161882	169200	171392	284266
GO:0002576	GO:PLATELET DEGRANULATION	2	81	87	88	213	226	335	351	710	801	805	808	813	928	948	967	1072	1191	1675	1950	2039	2153	2157	2162	2207	2243	2244	2266	2277	2316	2335	2621	3082	3273	3309	3479	3481	3674	3690	3827	3920	4067	5023	5054	5154	5155	5175	5196	5216	5265	5340	5341	5345	5473	5478	5552	5627	5660	6403	6647	6678	6812	6850	7018	7040	7042	7043	7044	7057	7076	7094	7114	7273	7277	7414	7422	7423	7424	7450	9948	10257	10487	22915	22927	27154	29106	440915
GO:0002577	GO:REGULATION OF ANTIGEN PROCESSING AND PRESENTATION	972	1236	3077	3111	3112	5243	5244	6363	6366	6556	6890	6891	7057	7454	10288	10392	23457	29108	54209	55080	64127	340273
GO:0002637	GO:REGULATION OF IMMUNOGLOBULIN PRODUCTION	604	940	951	958	959	2956	3133	3263	3458	3558	3565	3566	3567	3569	3586	3596	3598	5585	5591	5950	6375	6778	6810	6830	7009	7040	7124	7186	7189	7292	7293	7374	7468	7494	8741	9466	9984	22976	23529	30009	50943	51010	51237	54440	80762	90865	200558
GO:0002639	GO:POSITIVE REGULATION OF IMMUNOGLOBULIN PRODUCTION	940	951	958	2956	3133	3263	3458	3558	3565	3566	3567	3569	3596	5950	6375	6778	6810	7040	7292	7293	7374	7468	7494	8741	22976	23529	30009	51010	51237	54440	90865
GO:0002643	GO:REGULATION OF TOLERANCE INDUCTION	868	916	942	1178	2302	3106	3135	3146	3559	3620	5133	7048	10288	11213	23239	50943	64844	83737
GO:0002673	GO:REGULATION OF ACUTE INFLAMMATORY RESPONSE	2	101	116	134	325	629	708	710	717	718	720	721	722	725	727	729	730	731	732	733	735	966	1236	1268	1378	1604	1910	2161	2205	2207	2865	2867	2950	3075	3426	3553	3565	3569	3572	3630	3818	4179	4889	5008	5199	5245	5294	5321	5468	5627	5648	5733	5743	6352	6693	6863	7124	7448	7784	8600	8792	9180	25807	53833	55061	55829	55870	84699	114548	729230
GO:0002675	GO:POSITIVE REGULATION OF ACUTE INFLAMMATORY RESPONSE	101	718	1236	1268	2161	2205	2207	2865	2867	3553	3569	3572	3818	4889	5008	5294	5321	5733	5743	6352	6863	7124	7784	8600	8792	9180	84699	729230
GO:0002683	GO:NEGATIVE REGULATION OF IMMUNE SYSTEM PROCESS	2	29	100	103	116	134	246	259	284	301	325	335	336	347	355	409	472	558	604	613	639	652	653	671	684	708	710	714	722	725	727	796	836	861	868	942	951	966	972	1021	1029	1051	1268	1269	1281	1378	1493	1499	1540	1588	1604	1739	1813	1831	1840	1845	1997	2064	2150	2185	2207	2241	2302	2322	2551	2624	2633	2737	2796	2852	2876	3077	3105	3106	3111	3112	3123	3125	3126	3127	3133	3135	3142	3146	3162	3202	3204	3205	3218	3276	3280	3398	3428	3434	3440	3456	3481	3549	3558	3559	3565	3566	3575	3579	3586	3593	3598	3620	3623	3624	3630	3635	3659	3662	3707	3718	3902	3958	3965	4057	4067	4179	4211	4212	4254	4277	4282	4332	4609	4681	4763	4780	4792	4795	4830	4851	4856	5074	5094	5133	5170	5196	5272	5295	5468	5495	5532	5573	5585	5591	5610	5621	5648	5654	5692	5734	5771	5777	5788	5795	5914	5987	6223	6318	6347	6348	6366	6370	6375	6387	6397	6422	6441	6469	6662	6664	6693	6776	6777	6778	6890	6895	7009	7032	7040	7042	7043	7057	7070	7098	7099	7105	7124	7128	7292	7301	7356	7376	7430	7704	7940	8111	8294	8359	8360	8361	8362	8363	8364	8365	8366	8367	8368	8370	8379	8451	8654	8764	8772	8821	8832	8861	8915	8976	8993	8995	9093	9111	9173	9290	9306	9353	9370	9404	9466	9572	9607	9646	9655	9935	9984	10062	10077	10221	10234	10272	10288	10385	10443	10461	10464	10475	10519	10562	10634	10766	10859	10906	11005	11006	11025	11146	11213	11221	11240	11314	11326	22914	23228	23236	23240	23495	25793	25807	26007	26146	26191	26228	26279	26585	27202	27242	27342	28514	28959	29085	29126	29909	29979	50943	51083	51621	53347	53833	54106	54623	54900	55024	55061	55080	55365	55366	55824	55829	55914	56477	56940	57115	57162	57678	58509	63976	64092	64115	64127	64783	64844	79004	79132	79148	79577	79594	79626	79671	79679	80149	80349	80380	80381	80762	83416	83737	83881	84166	84174	84524	84807	84868	84959	90865	92747	114770	114771	117581	118788	121504	123169	127943	130733	133396	140685	149041	151888	153090	161882	171389	171392	201633	221395	257144	282618	284021	286430	338382	339390	340152	353376	374403	388585	441478	554313	729230	730249	100507436	100528032
GO:0002685	GO:REGULATION OF LEUKOCYTE MIGRATION	29	100	101	102	134	199	301	347	613	623	653	708	719	727	728	811	972	1230	1235	1236	1240	1435	1588	1893	1906	1907	1908	1909	2150	2155	2185	2277	2621	2833	2919	2920	2921	3071	3146	3162	3204	3383	3553	3565	3569	3570	3576	3579	3592	3627	3673	3674	3676	3929	3958	3965	4067	4254	4283	4354	4478	4681	4856	5054	5074	5196	5197	5473	5724	5733	5734	5879	5880	5919	6278	6347	6348	6351	6352	6354	6355	6363	6364	6366	6369	6370	6372	6373	6374	6375	6376	6387	6401	6403	6793	6868	6869	7057	7060	7097	7124	7422	7423	7424	7474	7784	7941	8174	8740	8764	8772	8784	8976	8995	9353	9439	9547	10488	10563	11035	11240	11314	22914	23075	23236	23604	26228	26585	27202	27342	29108	51157	51561	56477	57118	57402	64127	64805	79148	80310	83483	83700	90865	114609	148823	196527	257144	284114	375056	729230	100528032
GO:0002686	GO:NEGATIVE REGULATION OF LEUKOCYTE MIGRATION	29	100	134	347	613	653	727	1588	3162	3204	4681	4856	5734	6347	6366	6370	6387	8976	9353	11240	11314	22914	23236	26228	26585	27202	27342	56477	79148	90865	257144	100528032
GO:0002687	GO:POSITIVE REGULATION OF LEUKOCYTE MIGRATION	101	102	199	623	708	719	728	811	972	1230	1235	1236	1240	1435	1906	1907	1908	1909	2150	2155	2185	2277	2621	2919	2920	2921	3071	3146	3383	3553	3565	3569	3570	3576	3579	3592	3627	3673	3674	3676	3929	3958	3965	4254	4283	5054	5074	5196	5197	5473	5724	5733	5734	5879	5880	5919	6278	6347	6348	6351	6352	6354	6355	6363	6364	6366	6369	6372	6373	6374	6375	6376	6387	6401	6403	6868	6869	7057	7060	7097	7124	7422	7423	7424	7474	7784	7941	8174	8740	8764	8772	8784	8995	9439	9547	10488	10563	23075	23604	29108	51157	51561	57118	57402	80310	83483	114609	196527	284114	375056	729230
GO:0002688	GO:REGULATION OF LEUKOCYTE CHEMOTAXIS	102	199	708	719	727	728	811	972	1230	1235	1236	1240	1435	1588	1906	1907	1908	1909	2150	2155	2185	2277	2621	2919	2920	2921	3071	3146	3553	3565	3569	3570	3576	3579	3592	3627	3929	3965	4067	4283	4354	4681	4856	5054	5196	5197	5473	5879	5880	5919	6278	6347	6348	6351	6352	6354	6363	6366	6372	6373	6374	6375	6376	6387	6868	7057	7060	7422	7423	7424	7474	7941	8740	8995	9353	9547	10488	10563	11240	22914	23075	23604	26228	26585	27202	51157	51561	57118	57402	64127	79148	83700	114609	196527	284114	729230	100528032
GO:0002690	GO:POSITIVE REGULATION OF LEUKOCYTE CHEMOTAXIS	102	199	708	719	728	811	972	1230	1235	1236	1240	1435	1906	1907	1908	1909	2150	2155	2185	2277	2621	2919	2920	2921	3071	3146	3553	3565	3569	3570	3576	3579	3592	3627	3929	3965	4283	5054	5196	5197	5473	5879	5880	5919	6278	6347	6348	6351	6352	6354	6363	6366	6372	6373	6374	6375	6376	6387	6868	7057	7060	7422	7423	7424	7474	7941	8740	8995	9547	10488	10563	23075	23604	51157	51561	57118	57402	114609	196527	284114	729230
GO:0002691	GO:REGULATION OF CELLULAR EXTRAVASATION	29	101	613	3383	3676	5074	5724	5733	5734	6347	6366	6370	6387	6403	8772	9439	11035	23236	56477	80310	83483	729230
GO:0002694	GO:REGULATION OF LEUKOCYTE ACTIVATION	29	100	101	132	136	164	177	196	199	207	301	355	472	558	572	596	604	613	639	652	671	683	695	814	836	857	868	912	914	915	916	917	919	920	921	923	939	940	941	942	951	952	958	961	966	972	975	998	1026	1029	1051	1130	1141	1178	1209	1236	1268	1269	1326	1445	1493	1499	1540	1604	1725	1739	1803	1840	1845	1880	1947	1948	1949	1960	2050	2056	2064	2150	2205	2207	2241	2242	2255	2268	2302	2319	2322	2323	2475	2534	2621	2625	2736	2737	2796	2852	2885	2934	2956	3071	3077	3105	3108	3109	3111	3113	3115	3117	3118	3119	3120	3122	3123	3125	3126	3127	3133	3135	3142	3146	3162	3280	3329	3398	3440	3456	3458	3479	3481	3485	3493	3494	3495	3497	3500	3501	3502	3503	3507	3514	3537	3538	3539	3542	3543	3549	3553	3558	3559	3565	3566	3567	3569	3572	3574	3575	3586	3592	3593	3594	3596	3598	3600	3606	3620	3623	3624	3635	3659	3662	3683	3707	3718	3902	3916	3929	3932	3952	3956	3958	3964	3965	4004	4067	4179	4208	4282	4323	4332	4602	4690	4773	4860	5058	5062	5063	5074	5133	5170	5290	5295	5359	5573	5585	5588	5590	5621	5724	5771	5777	5781	5788	5791	5819	5879	5880	5896	5914	6095	6347	6352	6363	6366	6375	6422	6441	6469	6542	6622	6647	6654	6655	6664	6693	6708	6714	6776	6777	6778	6810	6813	6830	6845	6850	6863	6869	6885	6929	6935	7032	7040	7048	7057	7070	7099	7128	7186	7189	7292	7293	7301	7356	7374	7409	7412	7468	7474	7494	7525	7535	7704	7784	7940	8013	8379	8399	8440	8456	8546	8600	8654	8660	8673	8723	8740	8741	8744	8764	8767	8772	8808	8832	8876	8915	8943	8993	8995	9020	9092	9093	9173	9306	9308	9402	9466	9580	9655	9840	9846	9984	10062	10077	10125	10148	10193	10288	10320	10385	10451	10461	10464	10467	10666	10673	10808	10859	10892	11005	11035	11146	11148	11151	11314	11326	22806	22890	22914	22976	23240	23308	23495	23529	23729	25793	25807	26191	26228	26258	26279	27040	27166	27177	27240	27242	27342	28317	28442	28526	28577	28639	28755	28834	29108	29126	29851	30009	30835	50943	51010	51043	51083	51237	51561	53833	54440	54900	55012	55024	55423	55615	55795	55824	56940	57102	57115	57162	57181	57678	57817	57829	57864	59067	63925	64092	64115	64127	64223	64844	64926	79109	79155	79576	79626	79679	80149	80380	80381	80762	83639	83737	84106	84174	84433	84524	84807	84868	89780	90865	114548	114609	114770	114771	115650	124599	124912	126259	133396	146206	146850	148022	149041	149233	150372	151888	163747	200558	201294	201633	221395	246778	253260	282616	282617	282618	284021	286410	339390	340152	374403	388552	390530	441478	727897	729230	100133941	100423062	100507436	100528032	101180976
GO:0002695	GO:NEGATIVE REGULATION OF LEUKOCYTE ACTIVATION	29	301	355	472	558	604	613	639	652	671	836	868	951	972	1029	1051	1268	1269	1493	1540	1739	1840	1845	2064	2241	2302	2322	2737	2796	2852	3077	3123	3125	3126	3127	3135	3142	3146	3162	3398	3440	3456	3549	3558	3559	3565	3566	3586	3598	3620	3623	3624	3635	3659	3718	3902	3958	3965	4067	4332	5074	5573	5585	5621	5771	5777	6375	6422	6441	6469	6664	6693	7032	7040	7128	7292	7301	7356	7940	8379	8654	8764	8832	8993	8995	9306	9655	9984	10062	10077	10288	10385	10461	10464	10859	11146	11314	11326	23240	23495	25793	25807	26191	26279	27242	27342	29126	50943	51083	53833	54900	55024	55824	56940	57115	57162	64092	64115	64844	79626	79679	80149	80380	80381	80762	83737	84174	84524	84807	84868	114770	114771	133396	149041	151888	201633	221395	282618	284021	339390	340152	374403	441478	729230	100507436
GO:0002696	GO:POSITIVE REGULATION OF LEUKOCYTE ACTIVATION	100	101	132	136	164	177	199	207	301	558	572	596	604	639	683	695	857	912	914	915	916	917	919	920	921	923	939	940	941	942	952	958	961	966	972	975	998	1026	1130	1141	1236	1326	1445	1493	1604	1725	1803	1880	1947	1948	1949	1960	2050	2056	2150	2205	2207	2255	2268	2319	2323	2475	2534	2621	2625	2736	2737	2885	2956	3071	3105	3108	3109	3113	3115	3117	3118	3119	3120	3122	3123	3125	3126	3127	3133	3135	3142	3146	3280	3329	3458	3479	3481	3485	3493	3494	3495	3497	3500	3501	3502	3503	3507	3514	3537	3538	3539	3542	3543	3549	3553	3558	3559	3565	3566	3567	3569	3572	3574	3575	3592	3593	3594	3596	3600	3606	3635	3683	3707	3718	3916	3929	3932	3952	3956	3964	3965	4067	4179	4208	4282	4323	4602	4690	4773	4860	5058	5062	5063	5133	5170	5290	5295	5588	5590	5724	5777	5781	5788	5819	5879	5896	5914	6347	6352	6363	6366	6375	6469	6693	6708	6714	6776	6777	6778	6810	6845	6850	6863	6869	6885	6929	7040	7048	7057	7070	7099	7186	7189	7292	7293	7374	7409	7412	7468	7474	7494	7525	7535	7704	7784	8013	8440	8546	8600	8660	8673	8723	8740	8741	8744	8764	8767	8772	8808	8876	8915	8943	9020	9092	9093	9173	9308	9402	9655	9840	9846	10125	10148	10288	10320	10451	10666	10673	10808	10859	10892	11148	11151	22890	22914	22976	23308	23529	26228	26258	27177	28317	28442	28526	28577	28639	28755	28834	29108	29126	29851	30009	50943	51010	51561	54440	55012	55423	55615	55795	57162	57181	57678	57817	57829	59067	63925	64127	64223	64926	79109	79155	79576	79679	80380	80381	83639	84433	84868	89780	90865	114548	114609	115650	124599	124912	126259	146206	146850	148022	149233	151888	163747	253260	286410	388552	390530	729230	100133941	100423062	100528032
GO:0002697	GO:REGULATION OF IMMUNE EFFECTOR PROCESS	2	29	136	160	161	162	163	164	177	284	301	308	329	330	335	336	375	409	481	567	604	613	629	684	695	708	710	717	718	720	721	722	725	727	729	730	731	732	733	735	766	919	920	926	940	941	942	948	951	958	959	966	972	1173	1174	1175	1178	1351	1359	1366	1378	1604	1794	1965	2040	2150	2168	2205	2207	2208	2215	2241	2242	2252	2259	2268	2302	2534	2542	2558	2660	2865	2867	2956	3055	3075	3077	3105	3106	3109	3133	3142	3146	3162	3250	3263	3329	3383	3426	3434	3440	3456	3458	3481	3553	3558	3559	3565	3566	3567	3569	3575	3586	3592	3593	3594	3596	3598	3600	3630	3662	3718	3784	3902	3916	3929	3932	3952	3958	3965	4049	4067	4068	4130	4179	4190	4277	4282	4602	4638	4843	4913	5027	5062	5094	5166	5170	5194	5199	5225	5245	5272	5273	5371	5495	5532	5539	5585	5590	5591	5610	5627	5648	5650	5654	5724	5777	5788	5817	5819	5879	5880	5914	5950	6223	6318	6323	6347	6363	6375	6397	6507	6628	6629	6632	6693	6773	6776	6777	6778	6810	6813	6830	6845	6850	6885	6890	6895	7004	7009	7010	7040	7042	7043	7097	7098	7099	7105	7124	7128	7186	7187	7189	7292	7293	7311	7374	7409	7448	7454	7468	7474	7494	7535	7743	7784	7855	8013	8110	8208	8350	8351	8352	8353	8354	8355	8356	8357	8358	8417	8464	8482	8504	8673	8723	8736	8741	8764	8767	8772	8832	8905	8907	8915	8968	8993	8995	9437	9447	9466	9469	9474	9513	9655	9688	9698	9715	9788	9796	9798	9844	9846	9865	9982	9984	10053	10077	10125	10417	10475	10488	10666	10675	10758	10859	10892	11005	11035	11213	11221	11314	22890	22914	22918	22976	22985	23043	23369	23529	23586	23705	25758	25804	25818	25942	26007	26057	26146	26228	27120	27198	27342	29923	29995	30009	50943	51000	51010	51116	51191	51237	51291	51306	51308	51340	51538	51561	51606	51676	51704	51744	53833	54210	54212	54432	54440	54476	54795	54890	55061	55116	55120	55159	55163	55172	55173	55254	55343	55601	55690	55777	55894	56253	56829	56940	57007	57102	57115	57154	57506	59067	60386	60489	64115	64127	79004	79132	79594	79671	80149	80216	80271	80762	83737	84106	84868	89870	90865	91543	92400	94059	94107	114548	114770	114771	114836	115004	117157	117854	130340	139741	146850	148213	148811	149041	149233	149466	163702	163747	200316	200558	201294	246778	255520	259197	282618	283316	339390	339834	340061	377630	387849	401466	414325	440275	729230	100507436	100528032
GO:0002698	GO:NEGATIVE REGULATION OF IMMUNE EFFECTOR PROCESS	2	29	284	301	335	336	409	604	613	684	708	710	722	725	966	1378	1604	2241	2302	3077	3105	3106	3133	3142	3162	3434	3440	3456	3481	3559	3565	3566	3575	3586	3598	3630	3718	3958	3965	4179	4277	5094	5272	5495	5532	5591	5610	5648	5654	5777	5788	6223	6318	6375	6397	6693	6890	6895	7009	7040	7042	7043	7105	7124	7292	8832	8993	8995	9655	9984	10475	10859	11005	11213	11221	11314	26007	26146	27342	50943	53833	55061	56940	57115	64115	64127	79004	79132	79594	79671	80762	83737	84868	90865	114770	114771	149041	282618	339390	729230	100507436
GO:0002699	GO:POSITIVE REGULATION OF IMMUNE EFFECTOR PROCESS	136	164	301	567	718	729	940	941	942	948	951	958	972	2150	2205	2207	2208	2241	2242	2268	2865	2867	2956	3105	3106	3109	3133	3142	3162	3263	3329	3458	3553	3558	3565	3566	3567	3569	3592	3593	3594	3596	3598	3902	3916	3929	3965	4049	4067	4068	4179	4282	4602	4843	5027	5170	5225	5245	5590	5650	5724	5817	5819	5880	5914	5950	6223	6347	6363	6375	6776	6777	6778	6810	6813	6845	6850	6885	7010	7040	7097	7099	7124	7186	7189	7292	7293	7374	7409	7468	7474	7494	7535	7784	7855	8013	8417	8482	8673	8723	8741	8764	8767	8772	8832	8915	9655	9698	9846	10125	10417	10666	10859	10892	11314	22890	22914	22976	23369	23529	23705	25818	26057	26228	27342	30009	50943	51010	51237	51561	51704	51744	54440	55601	55894	56253	56829	57102	59067	64127	79132	89870	90865	91543	114548	114836	117157	117854	149233	163747	201294	259197	377630	414325	729230	100528032
GO:0002700	GO:REGULATION OF PRODUCTION OF MOLECULAR MEDIATOR OF IMMUNE RESPONSE	284	335	336	567	604	684	695	940	948	951	958	959	972	1178	2150	2207	2865	2867	2956	3077	3105	3133	3162	3263	3440	3456	3458	3558	3565	3566	3567	3569	3586	3596	3598	3718	4282	5225	5585	5590	5591	5650	5950	6375	6778	6810	6830	6885	7009	7010	7040	7042	7043	7097	7098	7099	7124	7186	7189	7292	7293	7374	7468	7474	7494	7855	8013	8482	8741	8764	8915	9466	9474	9865	9984	10417	10859	10892	11005	11213	22976	23529	25818	30009	50943	51010	51237	51704	51744	54440	54795	55894	59067	64115	64127	79004	80762	90865	91543	114548	117854	200558	414325
GO:0002701	GO:NEGATIVE REGULATION OF PRODUCTION OF MOLECULAR MEDIATOR OF IMMUNE RESPONSE	284	335	336	604	684	3077	3162	3440	3456	3586	3598	3718	5591	6375	7009	7040	7042	7043	7124	9984	10859	11005	11213	50943	64115	79004	80762	90865
GO:0002702	GO:POSITIVE REGULATION OF PRODUCTION OF MOLECULAR MEDIATOR OF IMMUNE RESPONSE	567	940	948	951	958	972	2150	2207	2865	2867	2956	3105	3133	3263	3458	3558	3565	3566	3567	3569	3596	4282	5225	5590	5650	5950	6375	6778	6810	6885	7010	7040	7097	7099	7186	7189	7292	7293	7374	7468	7474	7494	7855	8013	8482	8741	8764	8915	10417	10892	22976	23529	25818	30009	51010	51237	51704	51744	54440	55894	59067	64127	90865	91543	114548	117854	414325
GO:0002703	GO:REGULATION OF LEUKOCYTE MEDIATED IMMUNITY	29	136	164	177	409	567	604	613	684	695	718	722	725	940	958	1178	1378	2150	2205	2207	2208	2241	2242	2268	2302	2956	3077	3105	3106	3133	3146	3162	3263	3329	3383	3440	3456	3458	3481	3553	3558	3565	3566	3575	3586	3592	3593	3594	3596	3598	3718	3902	3916	3952	3965	4049	4067	4068	4843	5027	5170	5272	5532	5590	5724	5777	5788	5817	5819	5880	6318	6347	6375	6693	6776	6777	6778	6810	6813	6830	6845	6850	6885	6890	7040	7097	7098	7099	7124	7186	7189	7292	7374	7409	7454	7468	7535	7784	7855	8417	8673	8723	8741	8772	8832	9437	9466	9846	9984	10125	10666	10859	10892	11035	11314	22890	22914	22976	23529	23705	26228	27342	30009	50943	51010	51561	53833	54440	54795	55061	56253	56940	57102	59067	64115	64127	80762	84106	91543	114548	114836	117157	146850	149233	200558	201294	259197	339390	729230	100507436	100528032
GO:0002704	GO:NEGATIVE REGULATION OF LEUKOCYTE MEDIATED IMMUNITY	29	409	604	613	684	722	725	1378	2302	3077	3105	3106	3133	3162	3440	3456	3481	3575	3598	3718	3965	5272	5532	5777	5788	6318	6375	6693	6890	8832	9984	10859	11314	27342	50943	53833	55061	56940	64115	64127	80762	339390	729230	100507436
GO:0002705	GO:POSITIVE REGULATION OF LEUKOCYTE MEDIATED IMMUNITY	136	164	567	718	940	958	2150	2205	2207	2208	2268	2956	3105	3106	3133	3263	3329	3458	3553	3558	3565	3566	3592	3593	3594	3596	3902	3916	4049	4068	4843	5027	5590	5724	5817	5819	6347	6375	6776	6777	6778	6810	6845	6850	6885	7040	7124	7186	7189	7292	7374	7409	7468	7535	7784	7855	8417	8673	8723	8741	8772	9846	10125	10666	10892	22890	22914	22976	23529	23705	26228	30009	50943	51010	51561	54440	56253	59067	64127	91543	114548	114836	117157	149233	259197	100528032
GO:0002706	GO:REGULATION OF LYMPHOCYTE MEDIATED IMMUNITY	164	177	409	567	604	695	718	722	725	940	958	1178	1378	2205	2207	2208	2302	2956	3077	3105	3106	3133	3146	3263	3329	3440	3456	3458	3481	3553	3558	3565	3575	3586	3592	3593	3594	3902	3916	3952	3965	4049	4068	5027	5272	5532	5590	5777	5788	5817	5819	6318	6375	6693	6776	6777	6778	6830	6885	6890	7040	7124	7186	7189	7292	7374	7409	7454	7468	7784	7855	8417	8741	8772	9437	9466	9984	10125	10666	10859	10892	11035	22890	22914	22976	23529	23705	30009	50943	51010	51561	53833	54440	54795	55061	56253	56940	59067	64115	64127	80762	91543	114548	114836	117157	146850	149233	200558	259197	339390	100507436	100528032
GO:0002707	GO:NEGATIVE REGULATION OF LYMPHOCYTE MEDIATED IMMUNITY	409	604	722	725	1378	2302	3077	3105	3106	3133	3440	3456	3481	3575	3965	5272	5532	5777	5788	6318	6375	6693	6890	9984	10859	50943	53833	55061	56940	64115	64127	80762	339390	100507436
GO:0002708	GO:POSITIVE REGULATION OF LYMPHOCYTE MEDIATED IMMUNITY	164	567	718	940	958	2205	2207	2208	2956	3105	3106	3133	3263	3329	3458	3553	3558	3565	3592	3593	3594	3902	3916	4049	4068	5027	5590	5817	5819	6375	6776	6777	6778	6885	7040	7124	7186	7189	7292	7374	7409	7468	7784	7855	8417	8741	8772	10125	10666	10892	22890	22914	22976	23529	23705	30009	50943	51010	51561	54440	56253	59067	64127	91543	114548	114836	117157	149233	259197	100528032
GO:0002709	GO:REGULATION OF T CELL MEDIATED IMMUNITY	177	567	1178	3077	3105	3106	3133	3146	3329	3440	3456	3553	3575	3592	3593	3594	5027	5532	5590	5788	5817	5819	6375	6693	6885	7186	7189	7292	7454	7784	7855	8417	8772	10859	10892	11035	22890	50943	51561	53833	54440	54795	56940	64115	64127	91543	114548	149233	259197	339390
GO:0002711	GO:POSITIVE REGULATION OF T CELL MEDIATED IMMUNITY	567	3105	3106	3133	3329	3553	3592	3593	3594	5027	5590	5817	5819	6375	6885	7186	7189	7292	7784	7855	8417	8772	10892	22890	50943	51561	54440	91543	114548	149233	259197
GO:0002712	GO:REGULATION OF B CELL MEDIATED IMMUNITY	604	695	718	722	725	940	958	1378	2205	2207	2208	2302	2956	3263	3458	3558	3565	3586	4049	5777	5819	6375	6778	6830	7040	7124	7292	7374	7468	8741	9466	9984	10666	22976	23529	30009	50943	51010	55061	64127	80762	200558
GO:0002714	GO:POSITIVE REGULATION OF B CELL MEDIATED IMMUNITY	718	940	958	2205	2207	2208	2956	3263	3458	3558	3565	4049	5819	6375	6778	7040	7124	7292	7374	7468	8741	10666	22976	23529	30009	51010	64127
GO:0002715	GO:REGULATION OF NATURAL KILLER CELL MEDIATED IMMUNITY	164	409	3105	3106	3133	3481	3592	3593	3902	3916	3952	3965	4068	5272	5817	5819	6318	6776	6777	6890	7409	9437	10125	10666	10859	22914	23705	56253	59067	114836	117157	146850	259197	100507436	100528032
GO:0002717	GO:POSITIVE REGULATION OF NATURAL KILLER CELL MEDIATED IMMUNITY	164	3133	3592	3593	3902	3916	4068	5817	5819	6776	6777	7409	10125	10666	22914	23705	56253	59067	114836	117157	259197	100528032
GO:0002718	GO:REGULATION OF CYTOKINE PRODUCTION INVOLVED IN IMMUNE RESPONSE	284	335	336	567	604	684	695	948	972	1178	2150	2207	2865	2867	3077	3105	3162	3440	3456	3586	3718	4282	5590	6375	6885	7010	7040	7042	7043	7097	7098	7099	7124	7186	7189	7292	7474	7855	8013	8482	8764	8915	9474	9865	10417	10859	10892	11213	50943	51704	54440	54795	59067	64115	79004	91543	114548	117854
GO:0002719	GO:NEGATIVE REGULATION OF CYTOKINE PRODUCTION INVOLVED IN IMMUNE RESPONSE	284	335	336	604	684	3077	3162	3440	3456	3586	3718	6375	7040	7042	7043	7124	10859	11213	50943	64115	79004
GO:0002720	GO:POSITIVE REGULATION OF CYTOKINE PRODUCTION INVOLVED IN IMMUNE RESPONSE	567	948	972	2150	2207	2865	2867	3105	4282	5590	6375	6885	7010	7097	7099	7186	7189	7292	7474	7855	8013	8482	8764	8915	10417	10892	51704	54440	59067	91543	114548	117854
GO:0002724	GO:REGULATION OF T CELL CYTOKINE PRODUCTION	567	1178	3077	3105	3440	3456	5590	6375	6885	7186	7189	7292	7855	10892	50943	54440	54795	64115	91543	114548
GO:0002753	GO:CYTOPLASMIC PATTERN RECOGNITION RECEPTOR SIGNALING PATHWAY	329	330	331	708	841	1147	1540	3303	3304	3551	3654	3656	3661	3665	4792	5608	5970	6233	6397	6885	7099	7105	7128	7189	7311	7314	7316	7334	7335	8517	8767	9698	10392	10454	23118	23369	23586	26007	26057	26065	26191	55601	55914	56829	57506	64127	64135	64170	79132	79671	83737	89870	90268	257397	377630
GO:0002755	GO:MYD88-DEPENDENT TOLL-LIKE RECEPTOR SIGNALING PATHWAY	466	695	929	948	1147	1326	1385	1386	1432	1845	1846	1848	1849	2002	2353	3329	3551	3654	3656	3659	3665	3725	4205	4208	4214	4615	4790	4791	4792	4793	5528	5594	5595	5598	5599	5600	5601	5602	5604	5606	5608	5609	5970	6195	6196	6197	6233	6416	6500	6885	7096	7097	7099	7100	7189	7311	7314	7316	7334	7335	7867	8454	8517	8767	8945	9252	9261	10318	10333	10392	10454	11213	23118	23291	23643	51135	51284	51311	54106	57161	57162	64127	79155	81793	114609	130120	257397
GO:0002756	GO:MYD88-INDEPENDENT TOLL-LIKE RECEPTOR SIGNALING PATHWAY	329	330	466	841	929	1147	1326	1385	1386	1432	1845	1846	1848	1849	2002	2353	3551	3654	3656	3661	3665	3725	4205	4208	4790	4791	4792	4793	5528	5581	5594	5595	5598	5599	5600	5601	5602	5604	5606	5608	5609	5970	6195	6196	6197	6233	6416	6500	6885	7098	7099	7187	7189	7311	7314	7316	7321	7322	7323	7867	8454	8517	8737	8767	8772	8945	9252	9261	9641	10010	10392	10454	11035	23098	23118	23291	23643	29110	64127	79155	79931	148022	257397	353376
GO:0002757	GO:IMMUNE RESPONSE-ACTIVATING SIGNAL TRANSDUCTION	25	60	71	100	101	329	330	331	409	466	581	596	640	695	708	719	728	778	784	785	801	805	808	841	857	868	915	916	917	919	920	929	930	940	942	948	952	973	974	998	1072	1147	1236	1326	1378	1380	1385	1386	1387	1398	1432	1445	1493	1508	1513	1514	1520	1535	1540	1755	1793	1845	1846	1848	1849	1997	2002	2033	2150	2207	2209	2212	2214	2219	2268	2353	2533	2534	2625	2633	2672	2822	2867	2885	3055	3071	3113	3115	3117	3118	3119	3120	3122	3123	3125	3126	3127	3146	3265	3303	3304	3320	3326	3329	3384	3385	3493	3494	3495	3497	3500	3501	3502	3503	3507	3514	3537	3538	3539	3542	3543	3551	3553	3635	3654	3656	3659	3661	3662	3665	3684	3689	3702	3708	3709	3710	3725	3783	3845	3929	3932	3937	3958	3984	4057	4067	4205	4208	4214	4277	4332	4615	4620	4641	4651	4690	4772	4773	4775	4790	4791	4792	4793	4795	4893	5058	5062	5063	5074	5142	5144	5170	5289	5290	5291	5293	5295	5296	5335	5336	5338	5359	5528	5530	5532	5534	5566	5567	5568	5579	5580	5581	5583	5588	5594	5595	5598	5599	5600	5601	5602	5604	5606	5608	5609	5621	5641	5663	5664	5682	5683	5684	5685	5686	5687	5688	5689	5690	5691	5692	5693	5694	5695	5696	5698	5699	5700	5701	5702	5704	5705	5706	5707	5708	5709	5710	5711	5713	5714	5715	5716	5717	5718	5719	5720	5721	5728	5747	5771	5777	5788	5795	5879	5894	5970	5971	6195	6196	6197	6233	6397	6416	6500	6714	6794	6850	6885	7006	7070	7096	7097	7098	7099	7100	7105	7128	7184	7187	7189	7294	7301	7311	7314	7316	7321	7322	7323	7334	7335	7408	7409	7410	7430	7454	7456	7462	7525	7535	7867	8013	8398	8454	8517	8631	8685	8737	8767	8772	8915	8935	8945	8976	8993	9020	9039	9040	9252	9261	9402	9404	9473	9491	9564	9572	9641	9698	9840	9844	9861	9865	9971	10006	10010	10062	10092	10093	10094	10095	10096	10097	10109	10163	10197	10211	10213	10318	10333	10392	10451	10454	10458	10552	10616	10666	10695	10787	10892	11035	11119	11213	11314	22914	23098	23118	23180	23191	23198	23228	23291	23369	23586	23643	25865	26007	26057	26065	26191	26228	26253	26999	27040	27242	27342	28299	28317	28442	28454	28526	28577	28639	28755	28776	28834	28874	28876	28896	28908	28912	28916	29085	29108	29110	29979	30835	30849	30968	50852	50856	50943	51135	51284	51311	51324	51517	53347	54106	54900	54923	55072	55366	55601	55740	55824	55845	55914	56829	56940	57115	57161	57162	57181	57402	57506	57590	58509	59338	63916	64005	64127	64135	64170	64581	79132	79155	79671	79931	81035	81622	81793	83416	83737	84174	84433	85363	89857	89870	90268	91543	92747	93978	114609	114770	114771	118788	121665	122706	123920	130120	130132	143471	146206	147179	148022	148823	149041	150372	153090	163486	170482	171389	196051	257144	257397	286430	338339	338382	353376	377630	387357	390530	440786	644150	730249	100423062	100528032
GO:0002758	GO:INNATE IMMUNE RESPONSE-ACTIVATING SIGNAL TRANSDUCTION	101	329	330	331	409	466	695	708	801	805	808	841	857	929	942	948	1147	1326	1385	1386	1387	1432	1508	1513	1514	1520	1535	1540	1755	1845	1846	1848	1849	2002	2033	2150	2207	2219	2353	2534	2672	2867	3055	3146	3265	3303	3304	3329	3384	3385	3551	3553	3654	3656	3659	3661	3662	3665	3684	3689	3708	3709	3710	3725	3845	3929	4057	4067	4205	4208	4214	4615	4772	4773	4775	4790	4791	4792	4793	4795	4893	5058	5062	5063	5170	5289	5336	5528	5530	5532	5534	5566	5567	5568	5580	5581	5594	5595	5598	5599	5600	5601	5602	5604	5606	5608	5609	5641	5682	5683	5684	5685	5686	5687	5688	5689	5690	5691	5692	5693	5694	5695	5696	5698	5699	5700	5701	5702	5704	5705	5706	5707	5708	5709	5710	5711	5713	5714	5715	5716	5717	5718	5719	5720	5721	5894	5970	5971	6195	6196	6197	6233	6397	6416	6500	6714	6850	6885	7096	7097	7098	7099	7100	7105	7128	7184	7187	7189	7301	7311	7314	7316	7321	7322	7323	7334	7335	7867	8454	8517	8685	8737	8767	8772	8915	8945	8993	9020	9039	9040	9252	9261	9491	9572	9641	9698	9861	9865	9971	10010	10062	10197	10211	10213	10318	10333	10392	10454	10695	10892	11035	11213	22914	23098	23118	23180	23198	23291	23369	23586	23643	26007	26057	26065	26191	26253	29108	29110	29979	30835	30849	50856	51135	51284	51311	54106	55366	55601	55914	56829	57115	57161	57162	57402	57506	57590	58509	64127	64135	64170	64581	79132	79155	79671	79931	81035	81622	81793	83737	84433	85363	89870	90268	91543	92747	93978	114609	114770	114771	118788	122706	130120	143471	148022	153090	170482	171389	257397	286430	338339	338382	353376	377630	730249	100528032
GO:0002761	GO:REGULATION OF MYELOID LEUKOCYTE DIFFERENTIATION	324	325	537	632	714	760	796	814	841	861	1051	1230	1385	1435	1436	1499	2101	2353	2475	2488	2492	2624	2778	3059	3204	3398	3458	3562	3565	3567	3593	3605	3623	3624	3635	3665	3725	3976	4057	4067	4254	4286	4609	4763	4830	5196	5295	5578	5771	5914	5925	6348	6352	6422	6776	6886	7030	7071	7098	7099	7124	7189	7305	8111	8451	8473	8600	8737	8772	8821	9290	9370	9398	9607	9770	9935	10221	10234	10272	10320	10456	10766	10859	11006	11025	22985	27086	50604	51176	51341	51561	54997	55252	55904	56998	63976	80762	81501	84293	84959	128506	130733	133522	140685	146433	149233	161882	169200	171392	284266
GO:0002762	GO:NEGATIVE REGULATION OF MYELOID LEUKOCYTE DIFFERENTIATION	325	714	796	861	1499	2624	3204	3565	3623	3624	3635	4057	4067	4609	4763	4830	5295	5771	5914	6348	6422	7098	7099	8111	8451	8821	9290	9370	9607	9935	10221	10234	10272	10766	10859	11006	11025	63976	84959	130733	140685	161882	171392
GO:0002763	GO:POSITIVE REGULATION OF MYELOID LEUKOCYTE DIFFERENTIATION	537	760	796	841	861	1230	1385	1435	1436	2353	2778	3059	3398	3458	3562	3567	3593	3605	3725	3976	4254	5196	5578	5925	6352	6776	7071	7124	7189	8111	8473	8600	8737	8772	9398	10221	10320	10456	22985	50604	51176	51561	54997	55252	55904	56998	81501	128506	133522	146433	149233	169200
GO:0002764	GO:IMMUNE RESPONSE-REGULATING SIGNALING PATHWAY	25	60	71	88	100	101	207	284	329	330	331	369	409	466	572	581	596	640	673	685	695	708	719	728	778	784	785	801	805	808	815	816	817	818	841	842	857	868	915	916	917	919	920	929	930	940	941	942	948	952	958	973	974	998	1026	1027	1072	1147	1236	1326	1378	1380	1385	1386	1387	1398	1432	1437	1438	1439	1445	1493	1508	1512	1513	1514	1520	1535	1540	1742	1755	1793	1839	1845	1846	1847	1848	1849	1852	1950	1956	1997	2002	2033	2064	2065	2066	2069	2150	2205	2206	2207	2209	2210	2212	2214	2217	2219	2241	2246	2247	2248	2249	2250	2251	2252	2253	2254	2255	2260	2261	2263	2264	2268	2308	2309	2353	2475	2533	2534	2549	2625	2633	2672	2822	2867	2885	2902	2903	2904	2905	2906	2931	2932	3055	3071	3084	3113	3115	3117	3118	3119	3120	3122	3123	3125	3126	3127	3135	3146	3164	3265	3303	3304	3320	3326	3329	3384	3385	3493	3494	3495	3497	3500	3501	3502	3503	3507	3514	3537	3538	3539	3542	3543	3551	3553	3558	3559	3560	3561	3562	3563	3567	3568	3635	3654	3656	3659	3661	3662	3665	3667	3684	3689	3702	3708	3709	3710	3716	3717	3718	3725	3783	3802	3815	3845	3929	3932	3937	3958	3984	4057	4067	4140	4193	4205	4208	4214	4254	4277	4303	4332	4343	4615	4620	4641	4651	4684	4690	4747	4763	4772	4773	4775	4790	4791	4792	4793	4795	4893	5037	5058	5062	5063	5074	5142	5144	5154	5155	5156	5159	5170	5284	5289	5290	5291	5293	5295	5296	5335	5336	5338	5359	5528	5530	5532	5534	5536	5566	5567	5568	5579	5580	5581	5583	5588	5594	5595	5598	5599	5600	5601	5602	5604	5605	5606	5608	5609	5621	5641	5663	5664	5682	5683	5684	5685	5686	5687	5688	5689	5690	5691	5692	5693	5694	5695	5696	5698	5699	5700	5701	5702	5704	5705	5706	5707	5708	5709	5710	5711	5713	5714	5715	5716	5717	5718	5719	5720	5721	5728	5747	5771	5777	5781	5786	5788	5795	5879	5894	5921	5922	5923	5924	5970	5971	6195	6196	6197	6199	6233	6397	6416	6464	6500	6654	6708	6709	6710	6711	6712	6714	6794	6850	6885	7006	7010	7070	7096	7097	7098	7099	7100	7105	7128	7184	7187	7189	7249	7294	7301	7311	7314	7316	7321	7322	7323	7334	7335	7408	7409	7410	7430	7454	7456	7462	7525	7529	7535	7867	8013	8074	8315	8398	8437	8452	8454	8517	8631	8649	8660	8682	8685	8737	8767	8772	8817	8822	8823	8831	8844	8915	8935	8945	8976	8993	9020	9039	9040	9252	9261	9365	9402	9404	9462	9473	9491	9542	9564	9572	9641	9693	9698	9840	9844	9846	9861	9865	9965	9971	9978	10006	10010	10062	10092	10093	10094	10095	10096	10097	10109	10125	10142	10156	10163	10197	10211	10213	10288	10318	10333	10392	10451	10454	10458	10552	10616	10666	10695	10787	10817	10818	10859	10892	11035	11119	11213	11314	22821	22914	23035	23098	23112	23118	23180	23191	23198	23228	23239	23291	23369	23586	23643	25759	25780	25865	26007	26057	26065	26191	26228	26253	26281	26523	26999	27006	27040	27161	27242	27327	27342	28299	28317	28442	28454	28526	28577	28639	28755	28776	28834	28874	28876	28896	28908	28912	28916	28956	29085	29108	29110	29979	30835	30849	30968	50852	50856	50943	51135	51284	51311	51324	51332	51517	53347	53358	53833	54106	54756	54900	54923	55072	55366	55601	55615	55740	55824	55845	55914	56829	56940	57115	57161	57162	57181	57402	57506	57590	57690	57731	57761	58509	59338	63916	64005	64127	64135	64170	64223	64581	64926	79109	79132	79155	79671	79931	81035	81622	81793	83416	83737	84078	84174	84292	84335	84433	85363	89857	89870	90268	91543	92747	93978	114609	114770	114771	115727	117145	118788	121665	122706	123920	130120	130132	143471	145957	146206	147179	148022	148823	149041	150372	151888	152559	152831	153090	161742	163486	170482	171389	192669	192670	196051	221002	253260	257144	257397	286430	338339	338382	353376	377630	387357	390530	440786	644150	730249	100133941	100423062	100528032
GO:0002768	GO:IMMUNE RESPONSE-REGULATING CELL SURFACE RECEPTOR SIGNALING PATHWAY	25	60	71	88	100	207	284	369	572	581	596	640	673	685	695	719	728	778	784	785	801	805	808	815	816	817	818	841	842	868	915	916	917	919	920	930	940	941	942	952	958	973	974	998	1026	1027	1072	1147	1236	1378	1380	1385	1387	1398	1437	1438	1439	1445	1493	1742	1793	1839	1845	1847	1848	1849	1852	1950	1956	1997	2033	2064	2065	2066	2069	2205	2206	2207	2209	2210	2212	2214	2217	2219	2241	2246	2247	2248	2249	2250	2251	2252	2253	2254	2255	2260	2261	2263	2264	2268	2308	2309	2353	2475	2533	2534	2549	2625	2633	2822	2867	2885	2902	2903	2904	2905	2906	2931	2932	3055	3071	3084	3113	3115	3117	3118	3119	3120	3122	3123	3125	3126	3127	3135	3164	3265	3320	3326	3384	3385	3493	3494	3495	3497	3500	3501	3502	3503	3507	3514	3537	3538	3539	3542	3543	3551	3553	3558	3559	3560	3561	3562	3563	3567	3568	3635	3667	3702	3708	3709	3710	3716	3717	3718	3725	3783	3802	3815	3845	3932	3937	3958	3984	4067	4140	4193	4208	4214	4254	4277	4303	4332	4343	4620	4641	4651	4684	4690	4747	4763	4772	4773	4775	4790	4791	4792	4893	5037	5058	5062	5063	5074	5142	5144	5154	5155	5156	5159	5170	5284	5290	5291	5293	5295	5296	5335	5336	5338	5359	5530	5532	5534	5536	5566	5567	5568	5579	5580	5581	5583	5588	5594	5595	5599	5601	5602	5604	5605	5609	5621	5663	5664	5682	5683	5684	5685	5686	5687	5688	5689	5690	5691	5692	5693	5694	5695	5696	5698	5699	5700	5701	5702	5704	5705	5706	5707	5708	5709	5710	5711	5713	5714	5715	5716	5717	5718	5719	5720	5721	5728	5747	5771	5777	5781	5786	5788	5795	5879	5894	5921	5922	5923	5924	5970	5971	6199	6233	6416	6464	6500	6654	6708	6709	6710	6711	6712	6714	6794	6850	6885	7006	7010	7070	7097	7189	7249	7294	7311	7314	7316	7321	7322	7334	7335	7408	7409	7410	7430	7454	7456	7462	7525	7529	7535	8013	8074	8315	8398	8437	8452	8454	8517	8631	8649	8660	8682	8767	8817	8822	8823	8831	8844	8915	8945	8976	9020	9039	9040	9252	9365	9402	9404	9462	9473	9491	9542	9564	9693	9840	9844	9846	9861	9965	9978	10006	10092	10093	10094	10095	10096	10097	10109	10125	10142	10156	10163	10197	10213	10288	10451	10454	10458	10552	10616	10666	10787	10817	10818	10859	10892	11119	11314	22821	22914	23035	23112	23118	23180	23191	23198	23228	23239	23291	25759	25780	25865	26191	26228	26253	26281	26523	26999	27006	27040	27161	27242	27327	27342	28299	28317	28442	28454	28526	28577	28639	28755	28776	28834	28874	28876	28896	28908	28912	28916	28956	29085	29108	30835	30968	50852	50856	50943	51324	51332	51517	53347	53358	54756	54900	54923	55072	55615	55740	55824	55845	56940	57181	57690	57731	57761	59338	63916	64005	64170	64223	64581	64926	79109	83416	84078	84174	84292	84335	84433	89857	93978	115727	117145	121665	122706	123920	130132	143471	145957	146206	147179	148823	149041	150372	151888	152559	152831	153090	161742	163486	170482	192669	192670	196051	221002	253260	257144	257397	338339	387357	390530	440786	644150	100133941	100423062	100528032
GO:0002790	GO:PEPTIDE SECRETION	18	19	93	111	116	134	150	152	291	292	293	301	308	358	402	406	408	572	640	773	775	776	777	818	886	952	972	1080	1131	1268	1374	1392	1393	1394	1395	1813	1906	1908	1946	2029	2044	2243	2244	2266	2281	2550	2641	2645	2691	2692	2693	2695	2696	2697	2740	2746	2752	2778	2822	2850	2852	2863	2864	2865	2867	3033	3064	3077	3091	3123	3125	3126	3127	3156	3170	3172	3358	3382	3458	3553	3557	3569	3625	3630	3651	3667	3670	3708	3709	3710	3717	3741	3745	3747	3767	3790	3814	3952	3976	4041	4082	4087	4160	4316	4543	4544	4644	4661	4760	4825	4826	4842	4843	4856	4887	5019	5071	5122	5127	5140	5143	5208	5211	5213	5467	5530	5532	5566	5567	5568	5573	5575	5576	5577	5578	5581	5715	5733	5734	5781	5798	5799	5861	5894	5906	5950	5978	5991	6279	6280	6343	6352	6422	6513	6514	6566	6571	6616	6659	6717	6720	6755	6804	6810	6812	6814	6833	6844	6861	6865	6927	6928	6934	7021	7036	7074	7124	7200	7226	7349	7351	7425	7432	7442	7447	7849	8111	8398	8425	8431	8447	8600	8620	8622	8660	8826	8862	8864	8874	9024	9066	9230	9254	9324	9378	9451	9495	9515	9572	9575	9607	9699	9789	9854	9971	10411	10815	10911	11069	11132	22841	23054	23178	23409	23435	23478	23568	25874	25924	26056	26251	27230	27445	28972	29085	51083	51092	51167	51738	51762	54097	55107	55512	55585	55636	55638	56943	57393	57555	57818	59341	60559	65985	80024	84300	90007	90550	90701	91608	91942	94121	130399	131177	139760	143425	169026	222546	252983	283849	286676	353500	387597	388581	389692	399979	415116	594855
GO:0002791	GO:REGULATION OF PEPTIDE SECRETION	18	111	116	134	150	152	291	292	293	308	402	406	408	572	640	773	775	776	777	886	952	972	1080	1131	1268	1374	1392	1393	1395	1813	1946	2029	2044	2243	2244	2266	2281	2550	2641	2645	2691	2692	2693	2695	2696	2697	2740	2746	2752	2778	2822	2850	2852	2863	2864	2865	2867	3033	3077	3091	3123	3125	3126	3127	3156	3170	3172	3358	3382	3458	3553	3625	3630	3651	3667	3670	3708	3709	3710	3717	3741	3745	3747	3767	3790	3814	3952	3976	4041	4082	4543	4544	4661	4760	4825	4826	4842	4843	4856	4887	5019	5071	5122	5127	5140	5143	5208	5211	5213	5467	5530	5532	5566	5567	5568	5573	5575	5576	5577	5578	5581	5715	5733	5734	5781	5906	5950	5978	5991	6279	6280	6343	6352	6422	6513	6514	6566	6616	6659	6717	6720	6755	6804	6810	6812	6833	6844	6861	6934	7021	7036	7074	7124	7200	7226	7349	7351	7447	7849	8111	8398	8431	8447	8600	8620	8622	8660	8826	8862	8864	8874	9024	9066	9254	9324	9378	9495	9515	9572	9575	9607	9789	9854	9971	10411	10911	11069	11132	23054	23178	23409	23435	23478	23568	25874	25924	26251	27230	28972	29085	51092	51738	51762	55107	55636	55638	56943	57393	57555	57818	60559	65985	80024	84300	90007	90550	90701	91608	91942	94121	130399	131177	143425	169026	222546	252983	286676	353500	388581	415116
GO:0002792	GO:NEGATIVE REGULATION OF PEPTIDE SECRETION	150	308	972	1392	1393	1395	1813	2281	2693	3033	3156	3625	3667	3745	3767	3952	4543	4544	4842	4856	5071	5143	5211	5530	5715	5733	5734	5781	5978	6422	6720	6833	7351	7447	8620	8622	9515	9607	10911	23409	51738	56943	90007	91942	94121	130399	131177	353500	415116
GO:0002793	GO:POSITIVE REGULATION OF PEPTIDE SECRETION	18	116	134	408	572	640	886	952	1080	1392	1813	2243	2244	2266	2550	2641	2645	2691	2692	2695	2696	2697	2746	2752	2822	2850	2852	2863	2864	3077	3091	3123	3125	3126	3127	3630	3651	3670	3717	3814	3976	4825	4826	4887	5019	5208	5213	5467	5532	5581	5715	5734	5950	6279	6280	6343	6659	6717	6810	6934	7036	7200	7226	7349	7447	8111	8398	8431	8447	8600	8660	8862	8874	9854	11132	23054	23435	25874	25924	27230	29085	51738	51762	55107	57393	57555	65985	90550	91608	169026	222546	286676	388581
GO:0002819	GO:REGULATION OF ADAPTIVE IMMUNE RESPONSE	100	177	246	301	567	604	695	718	722	725	920	940	941	958	1178	1378	2205	2207	2208	2302	2956	3077	3105	3106	3133	3142	3146	3263	3329	3440	3456	3458	3553	3558	3565	3566	3572	3575	3586	3592	3593	3594	3659	3665	3718	4049	4208	5027	5532	5585	5588	5590	5777	5788	5817	5819	5987	6363	6375	6556	6693	6778	6830	6885	7040	7124	7128	7186	7189	7292	7374	7454	7468	7784	7855	8417	8741	8767	8772	8995	9173	9466	9655	9984	10666	10673	10859	10892	11035	11221	22890	22976	23411	23529	29108	30009	50943	51010	51561	53833	54440	54795	55061	56940	64092	64115	64127	80762	90865	91543	114548	115650	149041	149233	200558	246778	259197	338322	339390	440275	729230
GO:0002820	GO:NEGATIVE REGULATION OF ADAPTIVE IMMUNE RESPONSE	246	604	722	725	1378	2302	3077	3440	3456	3565	3566	3575	3718	5532	5777	5788	5987	6375	6693	7292	8995	9173	9984	10859	50943	53833	55061	56940	64092	64115	64127	80762	90865	149041	339390
GO:0002821	GO:POSITIVE REGULATION OF ADAPTIVE IMMUNE RESPONSE	100	301	567	718	920	940	941	958	2205	2207	2208	2956	3105	3106	3133	3142	3263	3329	3458	3553	3558	3565	3572	3592	3593	3594	4049	5027	5588	5590	5817	5819	6363	6375	6556	6778	6885	7040	7124	7186	7189	7292	7374	7468	7784	7855	8417	8741	8767	8772	9466	9655	10666	10673	10892	22890	22976	23411	23529	29108	30009	50943	51010	51561	54440	64127	91543	114548	115650	149233	259197	338322	440275	729230
GO:0002822	GO:REGULATION OF ADAPTIVE IMMUNE RESPONSE BASED ON SOMATIC RECOMBINATION OF IMMUNE RECEPTORS BUILT FROM IMMUNOGLOBULIN SUPERFAMILY DOMAINS	100	177	301	567	604	695	718	722	725	920	940	941	958	1178	1378	2205	2207	2208	2302	2956	3077	3105	3106	3133	3142	3146	3263	3329	3440	3456	3458	3553	3558	3565	3566	3575	3586	3592	3593	3594	3718	4049	4208	5027	5532	5585	5588	5590	5777	5788	5817	5819	6363	6375	6556	6693	6778	6830	6885	7040	7124	7128	7186	7189	7292	7374	7454	7468	7784	7855	8417	8741	8767	8772	8995	9173	9466	9655	9984	10666	10673	10859	10892	11035	22890	22976	23529	30009	50943	51010	51561	53833	54440	54795	55061	56940	64115	64127	80762	90865	91543	114548	115650	149041	149233	200558	246778	259197	338322	339390	729230
GO:0002823	GO:NEGATIVE REGULATION OF ADAPTIVE IMMUNE RESPONSE BASED ON SOMATIC RECOMBINATION OF IMMUNE RECEPTORS BUILT FROM IMMUNOGLOBULIN SUPERFAMILY DOMAINS	604	722	725	1378	2302	3077	3440	3456	3565	3566	3575	3718	5532	5777	5788	6375	6693	7292	8995	9173	9984	10859	50943	53833	55061	56940	64115	64127	80762	90865	149041	339390
GO:0002824	GO:POSITIVE REGULATION OF ADAPTIVE IMMUNE RESPONSE BASED ON SOMATIC RECOMBINATION OF IMMUNE RECEPTORS BUILT FROM IMMUNOGLOBULIN SUPERFAMILY DOMAINS	100	301	567	718	920	940	941	958	2205	2207	2208	2956	3105	3106	3133	3142	3263	3329	3458	3553	3558	3565	3592	3593	3594	4049	5027	5588	5590	5817	5819	6363	6375	6556	6778	6885	7040	7124	7186	7189	7292	7374	7468	7784	7855	8417	8741	8767	8772	9466	9655	10666	10673	10892	22890	22976	23529	30009	50943	51010	51561	54440	64127	91543	114548	115650	149233	259197	338322	729230
GO:0002825	GO:REGULATION OF T-HELPER 1 TYPE IMMUNE RESPONSE	301	941	3142	3566	3593	3594	3718	6363	6375	6556	7292	8767	9173	9466	9655	51561	90865	149233	246778	338322	729230
GO:0002828	GO:REGULATION OF TYPE 2 IMMUNE RESPONSE	301	604	942	972	1893	3142	3440	3456	3566	3569	3620	5590	5914	6375	6778	7292	9466	9655	64127	80762	90865	91543	114548	282618	729230
GO:0002831	GO:REGULATION OF RESPONSE TO BIOTIC STIMULUS	160	161	162	163	164	308	329	330	375	481	567	639	654	708	766	919	920	926	940	951	1173	1174	1175	1351	1359	1366	1535	1604	1794	1965	2040	2150	2168	2215	2252	2259	2534	2542	2558	2660	3055	3105	3146	3250	3273	3329	3434	3559	3565	3592	3593	3594	3600	3784	3932	4057	4064	4130	4190	4277	4282	4638	4795	4913	5062	5094	5166	5194	5225	5273	5371	5495	5539	5578	5610	5650	5654	5817	5819	5879	6323	6397	6507	6628	6629	6632	6693	6773	6895	7004	7105	7128	7187	7189	7311	7743	8110	8208	8350	8351	8352	8353	8354	8355	8356	8357	8358	8464	8504	8736	8905	8907	8968	9447	9450	9469	9513	9688	9698	9715	9788	9796	9798	9844	9982	10053	10077	10221	10475	10488	10666	10675	10758	10859	11005	22914	22918	22933	22985	23043	23328	23369	23586	23643	25758	25804	25818	25942	26007	26057	26146	27086	27120	27198	29110	29923	29995	51000	51116	51191	51291	51306	51308	51340	51538	51561	51606	51676	54210	54212	54432	54476	54890	55012	55116	55120	55159	55163	55172	55173	55254	55343	55601	55690	55777	55894	56253	56829	57007	57103	57154	57506	58509	59307	60386	60489	64127	79132	79594	79671	80149	80216	80271	83737	84868	85363	89870	90678	92400	94059	94107	115004	117854	130340	139741	148213	148811	149233	149466	163702	200316	245928	246778	255520	259197	283316	339834	340061	377630	387849	401466	414325	440275	730249	100528032
GO:0002832	GO:NEGATIVE REGULATION OF RESPONSE TO BIOTIC STIMULUS	639	708	3434	3559	4057	4277	4795	5094	5495	5610	5654	6397	6895	7105	7128	10221	10475	11005	22933	26007	26146	58509	59307	79132	79594	79671	83737	245928	730249
GO:0002833	GO:POSITIVE REGULATION OF RESPONSE TO BIOTIC STIMULUS	654	1535	2150	3273	3329	3592	3593	4064	4282	5225	5578	5650	5817	5819	7189	9450	9698	10666	22914	23328	23369	23643	25818	26057	29110	55601	55894	56253	56829	64127	79132	84868	89870	90678	259197	377630	414325	730249	100528032
GO:0002861	GO:REGULATION OF INFLAMMATORY RESPONSE TO ANTIGENIC STIMULUS	116	718	940	1236	1268	2205	2207	2876	3126	3586	3593	4049	5692	6693	7124	7784	53833	55829	64127	171389
GO:0002886	GO:REGULATION OF MYELOID LEUKOCYTE MEDIATED IMMUNITY	29	136	613	718	2150	2205	2207	2241	2242	2268	3162	3565	3566	3596	3598	3965	4067	5170	5724	5880	6810	6813	6845	6850	7535	8673	8723	8832	9846	11314	26228	27342	57102	84106	201294	729230
GO:0002888	GO:POSITIVE REGULATION OF MYELOID LEUKOCYTE MEDIATED IMMUNITY	136	718	2150	2205	2207	2268	3565	3566	3596	5724	6810	6845	6850	7535	8673	8723	9846	26228
GO:0002889	GO:REGULATION OF IMMUNOGLOBULIN MEDIATED IMMUNE RESPONSE	604	718	722	725	940	958	1378	2205	2207	2208	2302	2956	3263	3458	3558	3565	3586	4049	5777	5819	6375	6778	6830	7040	7124	7292	7374	7468	8741	9466	9984	10666	22976	23529	30009	50943	51010	55061	64127	80762	200558
GO:0002891	GO:POSITIVE REGULATION OF IMMUNOGLOBULIN MEDIATED IMMUNE RESPONSE	718	940	958	2205	2207	2208	2956	3263	3458	3558	3565	4049	5819	6375	6778	7040	7124	7292	7374	7468	8741	10666	22976	23529	30009	51010	64127
GO:0002902	GO:REGULATION OF B CELL APOPTOTIC PROCESS	100	581	604	695	972	3558	3586	4067	4282	5728	8660	8915	9212	26155	27086	57181	84941	96459
GO:0002920	GO:REGULATION OF HUMORAL IMMUNE RESPONSE	2	629	708	710	717	718	720	721	722	725	727	729	730	731	732	733	735	951	966	1236	1378	1604	2208	2302	3075	3263	3426	4049	4179	5199	5225	5245	5627	5648	5650	5777	7124	7448	7784	10563	11005	25818	55012	55061	55894	57829	64127	124976	414325	730249
GO:0002922	GO:POSITIVE REGULATION OF HUMORAL IMMUNE RESPONSE	718	729	1236	2208	3263	4049	5225	5245	5650	7124	7784	25818	55894	57829	64127	414325	730249
GO:0002931	GO:RESPONSE TO ISCHEMIA	596	815	857	1938	1978	2335	3099	3767	4217	5608	7157	7345	8864	8996	9131	10105	10519	10525	10891	23017	23172	23417	24145	29904	55328	56666	57103	79625	80315	375611
GO:0003002	GO:REGIONALIZATION	90	92	93	324	429	472	648	650	652	657	658	659	1044	1045	1046	1399	1482	1499	1649	1745	1746	1848	1856	1906	1950	1952	1954	1959	2016	2018	2019	2033	2114	2128	2186	2246	2248	2253	2255	2260	2263	2296	2297	2302	2303	2626	2637	2648	2668	2719	2735	2736	2737	2926	3064	3087	3110	3169	3170	3198	3199	3200	3202	3203	3204	3205	3206	3207	3211	3212	3213	3214	3215	3216	3217	3218	3219	3221	3222	3223	3224	3225	3226	3227	3229	3232	3233	3234	3235	3236	3237	3239	3280	3516	3670	3955	3975	4010	4038	4040	4041	4087	4088	4089	4091	4188	4208	4222	4223	4297	4300	4487	4488	4617	4618	4681	4760	4821	4824	4825	4838	4851	4909	4920	5013	5015	5046	5075	5076	5077	5080	5081	5087	5089	5090	5100	5125	5308	5362	5460	5523	5567	5591	5599	5626	5649	5663	5664	5727	5916	5992	6015	6045	6405	6422	6423	6434	6469	6495	6496	6497	6604	6608	6615	6656	6722	6790	6862	6899	6911	6926	6928	6939	6997	7025	7026	7046	7050	7080	7157	7289	7403	7471	7472	7473	7474	7476	7477	7478	7479	7482	7490	7516	7528	7547	7703	7704	7832	7849	7855	8022	8092	8100	8312	8313	8320	8557	8601	8626	8646	8829	8854	8861	8928	9096	9241	9289	9350	9355	9573	9620	9742	9839	9935	9968	10006	10159	10194	10220	10252	10287	10370	10371	10409	10512	10655	10683	10716	10736	10787	10818	22823	22856	22943	22955	23237	23242	23322	23432	23451	23462	23493	23509	23648	23770	25806	25911	26146	26160	26585	27023	27130	27152	28514	28996	29922	50937	50964	51098	51176	51668	51684	51715	54475	54567	54806	54903	55079	55081	55329	55764	55897	56033	56603	56998	57057	57216	57453	57534	57669	58495	58524	59343	60529	63950	64321	64399	64853	65057	79176	79191	79192	79600	79659	79728	79809	79971	80055	80199	80319	83439	83852	84314	84504	84667	84678	84976	85407	89780	91355	92129	120237	121643	123872	130497	134701	145258	153572	163589	168507	170825	200894	201164	204851	221322	221833	286204	340665	343930	344022	388585	389549	390992	441478
GO:0003006	GO:DEVELOPMENTAL PROCESS INVOLVED IN REPRODUCTION	90	91	92	100	116	117	133	174	183	190	196	207	247	249	268	269	283	285	301	324	329	355	367	374	405	408	409	430	472	546	558	578	581	583	585	595	596	598	599	638	639	652	653	654	655	657	658	659	666	668	675	677	682	726	835	838	841	891	898	899	960	994	1027	1028	1045	1046	1050	1051	1080	1103	1271	1299	1396	1432	1435	1437	1471	1495	1499	1508	1515	1586	1588	1594	1602	1618	1634	1718	1730	1738	1739	1747	1761	1811	1956	2034	2057	2067	2069	2099	2100	2116	2119	2175	2176	2185	2186	2188	2189	2252	2253	2254	2255	2263	2288	2295	2296	2309	2475	2488	2491	2492	2516	2549	2623	2624	2625	2626	2627	2661	2683	2693	2706	2707	2709	2736	2796	2885	3028	3074	3091	3148	3157	3169	3172	3190	3205	3206	3207	3209	3239	3267	3280	3293	3294	3295	3297	3306	3326	3371	3383	3417	3479	3480	3491	3516	3549	3552	3553	3586	3622	3623	3624	3625	3640	3643	3645	3676	3696	3726	3791	3815	3856	3880	3952	3955	3972	3973	3975	3976	3993	4040	4090	4142	4158	4188	4201	4216	4221	4233	4254	4257	4292	4322	4323	4327	4435	4436	4438	4678	4693	4744	4824	4838	4846	4851	4853	4867	4880	4882	4914	4920	4948	4957	5048	5054	5087	5139	5155	5156	5176	5241	5268	5270	5308	5310	5311	5321	5324	5333	5414	5467	5468	5469	5518	5566	5568	5591	5594	5604	5618	5619	5620	5654	5660	5728	5729	5734	5740	5743	5747	5781	5798	5819	5872	5914	5916	5926	5927	5950	5972	6045	6092	6196	6198	6240	6256	6257	6299	6382	6387	6422	6423	6469	6546	6586	6595	6597	6599	6615	6647	6657	6658	6662	6665	6667	6670	6692	6696	6714	6715	6716	6732	6736	6768	6770	6776	6777	6781	6788	6789	6790	6794	6795	6847	6874	6875	6895	6926	6928	6932	6934	6943	7022	7026	7040	7046	7073	7080	7098	7100	7110	7141	7258	7262	7274	7301	7314	7320	7337	7412	7421	7422	7425	7450	7472	7474	7476	7477	7482	7484	7490	7536	7704	7784	7812	7855	7942	8022	8031	8061	8085	8100	8195	8202	8204	8289	8320	8322	8382	8433	8521	8531	8549	8614	8626	8644	8648	8654	8751	8879	8890	8892	8893	8894	8999	9021	9025	9125	9148	9191	9210	9241	9271	9319	9353	9394	9420	9421	9444	9468	9510	9519	9576	9665	9702	9757	9820	9897	9985	10018	10046	10049	10116	10142	10155	10265	10272	10361	10370	10371	10388	10409	10461	10481	10499	10519	10522	10549	10653	10655	10658	10733	10761	10765	10818	10935	10959	11055	11144	11172	11196	11218	11331	22862	22873	22933	23054	23093	23139	23198	23205	23213	23405	23411	23414	23424	23462	23493	23598	23617	23626	23639	23762	25831	25836	25976	26038	26108	26256	26259	26271	26330	26471	26528	27022	27125	29072	29118	29844	29999	30812	50487	50511	50814	50846	51087	51176	51294	51361	51465	51493	51665	51738	51742	51804	54361	54456	54583	54760	54852	54888	54937	54997	55124	55193	55224	55342	55366	55636	55818	55840	56154	56159	56163	56165	56311	56729	56776	56853	56956	56977	57082	57448	57599	57623	57820	58495	58524	59338	59343	63946	63947	63948	63950	63951	63978	64207	64220	64591	64783	65010	79084	79582	79727	79733	79820	79977	79989	80025	80336	80712	81833	81892	81930	83700	83942	83943	83983	84072	84159	84223	84225	84236	84733	84870	84969	85315	89766	89884	90780	91181	91603	91978	93649	93661	113026	116369	117154	122042	124626	124997	128637	130497	131118	132141	132612	132625	135138	135935	144455	147872	147912	150365	151449	152006	157506	163589	164091	168391	171482	171483	171484	201164	203447	204474	220042	221037	221400	255220	255626	257062	259266	283417	317719	338773	338879	339906	341567	342977	344018	344758	346673	347732	349152	373861	373863	374308	374768	378807	378948	390443	402381	431707	494551	554236	642636	642658	646480	728137	728395	728403	728656	728695	768239	100125288	100289087	101927581	101928601
GO:0003007	GO:HEART MORPHOGENESIS	70	90	182	585	650	652	657	859	1280	1289	1301	1363	1386	1482	1499	1832	1856	1857	1901	1942	1954	2022	2050	2078	2138	2253	2263	2274	2280	2294	2296	2303	2348	2475	2535	2548	2625	2626	2627	2697	2702	2931	3037	3084	3091	3280	3357	3398	3491	3516	3549	3611	3643	3670	3725	4061	4088	4089	4092	4193	4194	4208	4487	4488	4607	4624	4625	4633	4634	4666	4734	4838	4851	4853	4886	4887	4889	5308	5311	5318	5457	5460	5469	5629	5663	5727	5747	5914	5915	5950	6256	6261	6262	6423	6469	6474	6491	6495	6546	6591	6604	6608	6659	6662	6664	6722	6862	6899	6909	6910	6926	7010	7042	7046	7049	7054	7057	7122	7134	7135	7137	7139	7157	7168	7273	7291	7403	7422	7468	7472	7474	7481	7547	7994	8100	8195	8313	8321	8463	8557	8642	8751	8854	8928	9031	9249	9421	9464	9510	9645	10087	10370	10395	10413	10427	10439	10454	10512	10637	10660	10848	22943	22992	23129	23405	23414	23462	23493	23768	25836	26005	26160	26508	27031	27063	27302	28514	51098	51384	51548	51684	53834	54345	54567	54583	54806	55036	55081	55212	55252	55273	55636	55742	55897	57057	57142	57178	57216	57493	57496	57534	58495	60485	64321	64783	65009	79633	79810	79977	83852	85366	89780	121643	123872	129446	129880	140706	161882	171023	200894	221496	339829	344022	388389	388591
GO:0003009	GO:SKELETAL MUSCLE CONTRACTION	89	154	487	844	859	1134	1140	1144	1145	1147	1756	1760	1938	2548	2946	3551	3759	4151	4621	4625	4626	6198	6547	7125	7134	7135	7136	7137	7138	7140	8557	9446	9456	51761	79784	92241	124093	126306	246329
GO:0003012	GO:MUSCLE SYSTEM PROCESS	18	58	59	70	72	88	89	100	132	134	136	142	146	147	148	150	151	152	154	156	183	186	199	226	287	301	302	309	384	444	476	477	478	481	487	488	493	583	624	775	779	786	796	800	801	805	808	816	817	818	844	845	857	859	1025	1128	1129	1131	1134	1136	1140	1141	1143	1144	1145	1146	1147	1160	1180	1193	1241	1264	1410	1482	1490	1535	1613	1674	1739	1756	1760	1812	1813	1824	1829	1832	1837	1889	1906	1907	1908	1909	1910	1938	2010	2017	2149	2257	2280	2281	2321	2475	2548	2593	2626	2627	2660	2668	2693	2697	2702	2741	2775	2852	2931	2932	2934	2946	2969	2982	3066	3162	3270	3281	3352	3356	3357	3363	3479	3488	3551	3553	3572	3600	3672	3673	3693	3728	3736	3741	3753	3757	3759	3768	3778	3784	3827	3952	4090	4092	4151	4208	4233	4604	4606	4607	4608	4620	4621	4622	4624	4625	4626	4629	4632	4633	4634	4635	4636	4637	4638	4653	4654	4656	4660	4703	4726	4775	4842	4846	4878	4886	4887	5020	5021	5023	5024	5025	5028	5074	5142	5144	5152	5224	5286	5290	5294	5300	5318	5348	5350	5530	5566	5578	5592	5606	5608	5664	5698	5724	5733	5734	5742	5743	5829	5997	6093	6198	6261	6262	6324	6327	6329	6330	6331	6332	6336	6426	6442	6525	6535	6546	6547	6548	6588	6640	6641	6647	6717	6722	6752	6781	6865	6869	6870	6901	6905	6915	7074	7094	7111	7125	7134	7135	7136	7137	7138	7139	7140	7168	7169	7170	7171	7222	7273	7341	7349	7373	7402	7414	7423	7431	7433	7442	7852	7871	7919	8013	8048	8082	8106	8165	8195	8291	8398	8470	8557	8654	8735	8736	8811	8837	8877	8912	8987	8996	9127	9150	9172	9312	9314	9446	9456	9472	9475	9499	9569	9631	9682	9722	9732	9759	9826	9992	9997	10021	10052	10087	10174	10203	10316	10324	10335	10345	10398	10539	10580	10611	10627	10848	10874	10891	10911	11214	22876	22953	23125	23171	23213	23327	23493	23630	23676	25802	26287	26509	27302	29119	29765	29766	29767	29895	29995	30819	51086	51196	51761	54206	55800	55959	56203	56923	57057	58498	59272	60675	79784	80005	80149	84676	85366	90523	92241	93408	93649	103910	124093	126306	126393	136319	140465	202333	219931	221476	246329	255743	388591	442721	493829	653361
GO:0003013	GO:CIRCULATORY SYSTEM PROCESS	18	29	40	59	70	94	100	112	116	128	133	134	135	136	146	147	148	150	151	152	153	154	155	156	183	185	186	207	239	240	284	287	290	348	444	476	477	478	480	481	482	483	486	487	488	489	490	491	492	493	551	552	553	554	566	583	585	613	623	624	659	680	710	719	774	775	776	777	778	779	781	782	783	784	785	786	796	801	805	808	817	844	845	857	859	947	952	998	1113	1128	1129	1131	1193	1215	1268	1278	1285	1359	1373	1392	1395	1401	1482	1490	1511	1522	1525	1535	1573	1579	1584	1585	1621	1636	1674	1727	1756	1760	1812	1813	1814	1816	1824	1827	1829	1832	1839	1874	1889	1906	1907	1908	1909	1910	2006	2013	2022	2028	2034	2035	2053	2056	2100	2149	2150	2153	2243	2244	2257	2266	2281	2296	2303	2313	2475	2548	2621	2626	2642	2643	2697	2702	2729	2730	2740	2775	2784	2837	2852	2865	2876	2909	2931	2946	2981	2982	2983	3043	3084	3091	3156	3162	3212	3269	3270	3274	3291	3350	3351	3352	3356	3357	3363	3383	3398	3458	3558	3579	3627	3630	3672	3708	3709	3710	3717	3728	3741	3750	3751	3752	3753	3757	3759	3761	3764	3767	3768	3770	3775	3777	3778	3784	3792	3827	3952	4012	4018	4041	4090	4092	4159	4193	4194	4204	4205	4223	4233	4311	4524	4544	4607	4624	4625	4632	4633	4634	4635	4778	4842	4843	4846	4852	4878	4879	4880	4881	4882	4883	4886	4888	4922	4923	4973	4987	5020	5021	5023	5025	5028	5029	5125	5138	5139	5142	5144	5155	5286	5290	5294	5318	5331	5345	5348	5349	5350	5443	5465	5467	5468	5540	5547	5566	5578	5588	5592	5606	5608	5664	5724	5733	5742	5743	5795	5797	5800	5972	5973	5997	6051	6196	6261	6262	6263	6271	6296	6324	6327	6330	6331	6336	6351	6376	6387	6426	6444	6445	6446	6464	6505	6518	6532	6543	6546	6547	6548	6640	6647	6648	6671	6714	6717	6720	6772	6781	6786	6846	6863	6865	6869	6870	6901	6909	6915	7010	7040	7042	7054	7067	7068	7080	7134	7135	7136	7137	7139	7168	7220	7273	7341	7349	7422	7423	7424	7432	7525	7531	7852	8048	8195	8398	8509	8529	8557	8620	8654	8850	8862	8864	8870	8912	8913	8985	9254	9270	9353	9370	9424	9446	9474	9607	9631	9722	9732	9759	9992	10021	10052	10059	10060	10142	10159	10242	10265	10266	10268	10335	10345	10368	10369	10371	10539	10631	10659	10699	10768	10800	10848	10911	11138	11149	11156	11188	22953	23171	23327	23493	23576	23630	26251	26509	27035	27091	27092	27129	27302	27345	27347	28514	29098	29119	29953	30818	30819	30820	50848	51086	51752	53822	53826	53828	54567	54795	55636	55799	55800	56998	57057	57085	57493	57731	57835	59272	59283	59284	59285	59341	59342	60598	64091	64167	65125	66002	79924	80005	80149	80333	80763	81285	83943	83988	84525	84876	85366	89797	89832	91608	91807	93589	121643	137868	143282	154796	157378	170690	206338	219537	255061	257313	347148	388591
GO:0003014	GO:RENAL SYSTEM PROCESS	107	108	109	111	112	113	114	115	134	148	154	183	185	186	290	355	358	359	360	361	551	552	554	596	652	685	775	947	1136	1141	1143	1312	1535	1579	1585	1813	1814	1906	1909	1910	2013	2149	2150	2621	2697	2702	2778	2837	2934	3037	3043	3291	3493	3494	3512	3675	3758	3778	3784	3827	4162	4643	4645	4879	4881	4883	4987	5020	5125	5155	5345	5566	5567	5568	5573	5575	5576	5577	5585	5641	5733	5734	5800	5972	6446	6781	6863	6869	6927	7021	7442	7466	8529	8644	8692	8766	9356	9368	9370	10699	10911	22841	23213	26249	28912	50484	51763	55959	57835	63929	65266	66002	79706	80763	81285	196883
GO:0003015	GO:HEART PROCESS	70	100	133	134	146	147	148	153	154	156	183	186	287	444	476	477	478	480	481	482	483	486	487	488	489	490	491	492	493	552	774	775	776	777	778	779	781	782	783	784	785	786	796	801	805	808	817	844	845	857	859	998	1113	1129	1193	1395	1482	1490	1525	1573	1636	1674	1756	1760	1813	1824	1829	1832	1839	1906	1907	1908	2034	2257	2281	2475	2548	2626	2697	2702	2740	2775	2876	2931	2946	3270	3458	3558	3708	3709	3710	3717	3728	3741	3750	3751	3752	3753	3757	3759	3761	3767	3768	3770	3775	3777	3784	4090	4092	4159	4193	4194	4205	4233	4607	4624	4625	4632	4633	4634	4635	4842	4846	4878	4880	4881	4882	5020	5025	5142	5144	5290	5294	5318	5348	5349	5350	5566	5578	5606	5608	5664	5997	6196	6261	6262	6263	6271	6324	6327	6330	6331	6336	6426	6444	6445	6505	6543	6546	6547	6548	6640	6647	6671	6714	6717	6720	6781	6786	6863	6870	6901	6909	7042	7054	7067	7068	7134	7135	7136	7137	7139	7168	7220	7273	7341	7349	7423	7531	7852	8048	8557	8620	8654	8862	8912	8913	9254	9424	9446	9474	9631	9722	9759	9992	10021	10052	10059	10060	10142	10265	10268	10345	10368	10369	10371	10539	10659	10699	10768	10848	10911	11149	23171	23327	23493	23630	26251	27091	27092	27129	27302	29098	29119	30818	30819	30820	51086	53822	53826	53828	54795	55799	55800	57731	59272	59283	59284	59285	60598	64091	80149	80333	80763	84525	84876	85366	89832	93589	121643	137868	157378	388591
GO:0003016	GO:RESPIRATORY SYSTEM PROCESS	128	134	154	477	2548	2741	2744	3202	3714	4204	4692	5090	5864	6939	7134	7403	7763	8929	9427	22871	26164	30012	54413	57190	57555	57616	79068	83931	92170	170825
GO:0003018	GO:VASCULAR PROCESS IN CIRCULATORY SYSTEM	29	40	59	112	116	133	134	136	146	147	148	150	151	152	153	154	155	183	185	186	207	239	240	284	348	477	551	552	553	554	566	583	613	624	659	775	796	857	952	1113	1128	1131	1373	1401	1621	1636	1812	1816	1889	1906	1907	1908	1909	1910	2053	2100	2149	2150	2243	2244	2266	2296	2303	2643	2697	2702	2729	2730	2837	2852	2876	2909	2982	3043	3091	3156	3162	3269	3274	3350	3351	3352	3356	3357	3363	3383	3579	3630	3672	3741	3764	3778	3792	3827	3952	4544	4842	4843	4846	4878	4879	4880	4881	4886	4922	5021	5023	5025	5028	5029	5138	5139	5286	5345	5467	5588	5592	5724	5733	5742	5743	5795	5797	5997	6351	6376	6464	6532	6546	6640	6647	6648	6714	6865	6869	6915	7010	7040	7349	7422	7432	7525	8195	8398	8850	8862	8864	8985	9270	9353	9474	9732	10242	10266	10335	10911	11156	27345	54795	56998	59272	59341	59342	80005	91807	143282	154796	219537	257313
GO:0003044	GO:REGULATION OF SYSTEMIC ARTERIAL BLOOD PRESSURE MEDIATED BY A CHEMICAL SIGNAL	146	147	148	153	154	155	183	185	186	290	552	553	554	1215	1359	1511	1522	1535	1585	1636	1814	1816	1889	1906	1907	1908	2028	2149	2150	2702	3291	4311	4846	5021	5125	5144	5345	5972	6196	6518	6648	6869	7080	7168	8509	10159	10699	27035	59272	81285	91608
GO:0003071	GO:RENAL SYSTEM PROCESS INVOLVED IN REGULATION OF SYSTEMIC ARTERIAL BLOOD PRESSURE	134	183	185	186	1535	1579	1585	2013	2149	2150	2621	2697	2702	2837	3291	5125	5155	5345	5800	5972	8529	10911	66002	81285
GO:0003073	GO:REGULATION OF SYSTEMIC ARTERIAL BLOOD PRESSURE	40	134	146	147	148	153	154	155	183	185	186	290	551	552	553	554	585	659	796	1215	1359	1511	1522	1535	1579	1585	1636	1813	1814	1816	1889	1906	1907	1908	2013	2022	2028	2149	2150	2621	2697	2702	2837	2931	3291	4204	4311	4846	4878	4923	5021	5125	5144	5155	5331	5345	5547	5800	5972	6196	6518	6648	6869	7080	7137	7168	8509	8529	8870	9424	10159	10631	10699	10911	22953	23576	27035	57835	59272	65125	66002	80763	81285	83988	89797	89832	91608	170690
GO:0003081	GO:REGULATION OF SYSTEMIC ARTERIAL BLOOD PRESSURE BY RENIN-ANGIOTENSIN	183	185	186	290	1215	1359	1511	1522	1535	1636	1814	1889	2028	2149	2150	2702	4311	5125	5345	5972	6196	6869	7080	8509	10159	27035	59272	81285
GO:0003091	GO:RENAL WATER HOMEOSTASIS	107	108	109	111	112	113	114	115	358	359	360	361	551	554	1579	1585	2778	3037	4645	5566	5567	5568	5573	5575	5576	5577	7021	7466	8529	8692	8766	22841	51763	66002	196883
GO:0003094	GO:GLOMERULAR FILTRATION	134	358	947	1909	2013	2149	2150	2621	2697	2702	2837	3493	3494	3512	4162	4643	5155	5800	10911	23213	28912	55959	63929
GO:0003143	GO:EMBRYONIC HEART TUBE MORPHOGENESIS	90	585	1482	1954	2022	2253	2348	2626	2697	3091	3280	3549	4088	4208	4838	4851	5311	5663	6262	6469	6491	6608	6722	6909	6926	7474	7547	8195	8463	8928	9421	9464	9645	10413	10660	22992	26005	26160	27031	28514	51098	51684	54345	54806	55036	55081	55212	55897	57057	57216	57534	58495	64321	65009	83852	89780	121643	123872	129880	200894	339829	344022	388389	388591
GO:0003151	GO:OUTFLOW TRACT MORPHOGENESIS	182	1386	1482	1499	1856	1857	2138	2253	2263	2296	2303	2348	2535	2627	2702	3091	3280	3516	3611	3670	3725	4208	4488	4734	4886	4887	4889	5308	5914	5915	6261	6423	6495	6664	6899	6909	6926	7057	7122	7291	7422	7474	7481	8321	8928	9249	9464	10370	10427	10512	23129	23405	23414	23493	25836	26508	54345	55742	57057	64321	161882
GO:0003156	GO:REGULATION OF ORGAN FORMATION	650	652	655	1499	2138	2246	2248	2253	2255	2260	2668	3207	3227	3237	3280	3670	4851	5460	6469	6495	6899	6910	7472	7474	7482	7490	9464	10252	10370	10818	22943	23213	55897	89780
GO:0003158	GO:ENDOTHELIUM DEVELOPMENT	90	93	94	182	183	239	387	388	652	654	659	694	947	1003	1460	1499	1901	1903	2022	2116	2150	2303	2658	2697	2701	2702	2876	2889	2947	3084	3209	3215	3383	3397	3516	3551	3553	3627	3791	3911	4089	4233	4301	4478	4851	4855	5138	5144	5175	5624	5629	5764	5802	5906	5908	5962	6093	6781	6788	6789	7026	7082	7122	7124	7132	7430	7476	7477	7498	7716	8721	8829	8985	9294	9414	9475	9693	10411	11061	23135	23462	23493	25865	25932	26051	26084	27086	28514	30061	50848	54345	54567	55273	55897	57493	57826	58495	60484	64102	64321	80274	80781	81575	81792	83605	84913	90627	91663	153562	168667	391104	646817
GO:0003159	GO:MORPHOGENESIS OF AN ENDOTHELIUM	94	387	388	652	1460	1499	3516	3627	4851	5629	25865	27086	54345	54567	58495	64321	81792	83605	90627
GO:0003170	GO:HEART VALVE DEVELOPMENT	90	182	639	650	1942	2078	2475	2625	2626	2702	3491	4089	4091	4193	4194	4208	4851	4853	5308	6474	6659	6662	6910	7042	7291	7541	8642	10439	23462	23493	25831	26508	53834	57057	64220	161882	642658
GO:0003171	GO:ATRIOVENTRICULAR VALVE DEVELOPMENT	90	650	1942	2626	2702	3491	4089	4193	4194	4851	5308	6659	6910	7291	8642	10439	23462	23493	26508	57057	161882
GO:0003179	GO:HEART VALVE MORPHOGENESIS	90	182	650	1942	2078	2475	2625	2626	2702	3491	4089	4193	4194	4208	4851	4853	6659	6662	6910	7042	7291	8642	10439	23462	23493	26508	53834	57057	64220	161882	642658
GO:0003181	GO:ATRIOVENTRICULAR VALVE MORPHOGENESIS	90	650	1942	2626	3491	4089	4193	4194	4851	6659	6910	7291	8642	10439	23462	23493	26508	161882
GO:0003197	GO:ENDOCARDIAL CUSHION DEVELOPMENT	90	182	650	652	657	2022	2065	2078	2253	2294	2626	3516	3670	4089	4193	4194	4487	4488	4734	4851	6591	6662	6909	6910	7057	7291	8642	23462	26508	55273	57057	78987
GO:0003203	GO:ENDOCARDIAL CUSHION MORPHOGENESIS	650	657	2022	2253	3516	3670	4089	4193	4194	4487	4488	4851	6591	6662	6909	7291	8642	23462	26508	55273	57057
GO:0003205	GO:CARDIAC CHAMBER DEVELOPMENT	90	163	182	287	639	652	859	1301	1363	1482	1785	1832	1857	2253	2263	2274	2280	2294	2296	2303	2535	2625	2626	2627	2702	2931	3084	3091	3209	3280	3340	3398	3491	3516	3670	3776	4036	4052	4061	4089	4091	4092	4193	4194	4208	4488	4607	4624	4625	4628	4633	4634	4666	4851	4853	4887	4889	5125	5308	5318	5457	5469	5629	5754	5914	5915	5950	6091	6256	6262	6299	6331	6423	6474	6604	6608	6659	6664	6722	6899	6909	6910	6926	7010	7049	7134	7135	7137	7139	7157	7168	7468	7472	7474	7481	7541	7798	8100	8131	8289	8321	8543	8928	9249	9321	9421	9464	9510	9784	9794	10370	10454	10512	10818	10848	11064	11174	23129	23414	23462	23493	25831	26508	27031	27302	51684	53834	54567	54583	55742	55897	57057	57167	57216	57493	58495	60485	64220	64783	65250	78987	79810	79977	80199	84516	93649	129446	140706	157378	161882	199699	374654
GO:0003206	GO:CARDIAC CHAMBER MORPHOGENESIS	90	182	859	1301	1363	1482	1832	1857	2253	2263	2274	2280	2294	2296	2303	2535	2625	2626	2627	2702	2931	3084	3091	3280	3398	3491	3516	3670	4061	4092	4193	4208	4488	4607	4624	4625	4633	4634	4851	4853	4887	4889	5308	5318	5457	5469	5629	5914	5915	5950	6256	6262	6423	6474	6604	6608	6659	6664	6722	6899	6909	6910	6926	7010	7049	7134	7135	7137	7139	7157	7168	7468	7472	7474	7481	8100	8321	8928	9249	9421	9464	9510	10370	10512	10848	23414	23462	23493	26508	27302	53834	54567	54583	55742	55897	57057	57216	57493	58495	60485	64783	79810	79977	140706	161882
GO:0003208	GO:CARDIAC VENTRICLE MORPHOGENESIS	182	1301	1363	1482	1832	2263	2280	2294	2296	2303	2625	2626	2931	3084	3091	3516	3670	4061	4092	4208	4607	4624	4625	4633	4634	4851	4887	4889	5318	5457	5469	5629	6256	6262	6423	6604	6659	6664	6910	7049	7134	7135	7137	7139	7168	8928	9421	9464	10512	10848	23414	23462	23493	26508	27302	54567	55897	57057	57493	79810	79977	140706
GO:0003209	GO:CARDIAC ATRIUM MORPHOGENESIS	90	1482	2626	2702	3491	3670	4624	4851	4853	5308	5629	6474	6608	6659	6910	7139	7468	7472	7474	23493	27302	54567	55897	57057	57493	140706	161882
GO:0003215	GO:CARDIAC RIGHT VENTRICLE MORPHOGENESIS	182	1482	2625	2626	3670	4851	6604	6659	8928	9421	9464	10512	10848	23414	23493	57057
GO:0003229	GO:VENTRICULAR CARDIAC MUSCLE TISSUE DEVELOPMENT	1301	1482	1829	1832	2263	2280	2296	2303	2626	3084	3398	3516	3670	4061	4082	4092	4607	4624	4625	4633	4634	4851	5318	5457	5469	5629	6256	6262	6910	6926	7049	7134	7135	7137	7139	7168	7373	8928	9421	10848	23414	23462	23493	27302	54567	57493	79810	140706
GO:0003230	GO:CARDIAC ATRIUM DEVELOPMENT	90	287	1482	2626	2702	3491	3670	4193	4194	4624	4851	4853	5308	5629	6474	6608	6659	6910	7139	7468	7472	7474	23493	27031	27302	54567	55897	57057	57493	140706	161882	199699
GO:0003231	GO:CARDIAC VENTRICLE DEVELOPMENT	163	182	639	1301	1363	1482	1785	1832	2263	2280	2294	2296	2303	2535	2625	2626	2702	2931	3084	3091	3209	3280	3398	3491	3516	3670	3776	4036	4052	4061	4091	4092	4193	4194	4208	4607	4624	4625	4633	4634	4666	4851	4887	4889	5308	5318	5457	5469	5629	5754	6091	6256	6262	6299	6331	6423	6604	6659	6664	6910	6926	7049	7134	7135	7137	7139	7168	7468	7474	7481	7798	8131	8321	8543	8928	9321	9421	9464	10370	10512	10818	10848	11064	23414	23462	23493	25831	26508	27302	51684	53834	54567	54583	55897	57057	57167	57216	57493	60485	64220	64783	65250	79810	79977	84516	93649	129446	140706	157378	161882	199699
GO:0003254	GO:REGULATION OF MEMBRANE DEPOLARIZATION	239	288	567	596	706	817	859	885	1634	2257	2273	2537	2697	2702	2729	2730	3791	4092	4653	4804	4923	5027	5774	6324	6327	6331	6336	6714	8620	8913	10021	10399	10962	23171	23327	29098	55012	55800	84941	120892
GO:0003279	GO:CARDIAC SEPTUM DEVELOPMENT	90	163	182	287	639	652	1482	1785	1857	2253	2263	2535	2625	2626	2627	2702	3209	3280	3340	3398	3491	3670	4036	4052	4089	4091	4092	4193	4194	4488	4628	4851	4853	5125	5308	5629	5754	5914	5915	6091	6299	6608	6659	6664	6899	6909	6910	6926	7157	7468	7474	7481	7541	7798	8100	8131	8321	8543	9249	9321	9421	9784	9794	10370	10454	10818	11064	11174	23129	23414	23462	23493	25831	26508	27031	51684	53834	54583	55742	57057	57167	57216	57493	60485	64220	64783	65250	78987	80199	84516	129446	161882	199699	374654
GO:0003281	GO:VENTRICULAR SEPTUM DEVELOPMENT	163	639	1482	1785	2263	2535	2625	2626	2702	3209	3280	3398	3491	4036	4052	4091	4092	4193	4194	4851	5308	5629	5754	6091	6299	6659	6664	6910	6926	7468	7474	7481	7798	8131	8321	8543	9321	10370	10818	11064	23414	23462	23493	25831	26508	51684	53834	54583	57167	57216	57493	60485	64220	64783	65250	84516	129446	161882	199699
GO:0003283	GO:ATRIAL SEPTUM DEVELOPMENT	90	287	1482	2626	2702	3491	3670	4193	4194	4853	6608	6659	6910	7468	23493	27031	57057	161882	199699
GO:0003298	GO:PHYSIOLOGICAL MUSCLE HYPERTROPHY	183	186	817	859	2475	2626	2931	4878	5300	7373	7919	8470	9150	9472	10611	93649	221476
GO:0003299	GO:MUSCLE HYPERTROPHY IN RESPONSE TO STRESS	493	2626	2627	4208	4775	4878	5530	7222	8557	9682	9759	22876	23125	23493	27302	54206
GO:0003300	GO:CARDIAC MUSCLE HYPERTROPHY	132	142	183	186	493	817	859	1025	1889	1906	2475	2626	2627	2931	2932	3066	3357	3479	3572	3952	4208	4775	4878	5025	5152	5300	5530	5578	5997	6262	6548	7074	7222	7273	7373	7919	8013	8048	8165	8470	8557	8654	9150	9472	9682	9759	10539	10611	11214	22876	23125	23493	27302	29995	54206	90523	93649	136319	221476
GO:0003301	GO:PHYSIOLOGICAL CARDIAC MUSCLE HYPERTROPHY	183	186	817	859	2475	2626	2931	4878	5300	7373	7919	8470	9150	9472	10611	93649	221476
GO:0003309	GO:TYPE B PANCREATIC CELL DIFFERENTIATION	406	572	652	653	654	1021	2627	2931	2932	3642	3651	4221	4821	4825	5080	5170	5991	6009	6608	7474	9575	28514	51092	222546	391104
GO:0003323	GO:TYPE B PANCREATIC CELL DEVELOPMENT	406	572	652	653	654	1021	2931	2932	3642	4821	4825	5170	5991	6009	6608	7474	9575	28514	51092
GO:0003333	GO:AMINO ACID TRANSMEMBRANE TRANSPORT	6505	6506	6507	6509	6511	6512	6519	6533	6534	6535	6536	6541	6542	6545	8140	8501	8504	8604	9056	9057	10165	10166	10991	11136	11254	23428	23657	28968	54407	54716	54896	55089	55117	55238	56301	57030	57084	57709	64849	79751	81539	81893	84889	115286	120103	124565	124935	140679	145389	146167	151258	153129	153201	157724	206358	246213	285641	348932	387254	387700	388662
GO:0003338	GO:METANEPHROS MORPHOGENESIS	186	652	793	1499	2255	2302	2668	3280	3975	3976	4435	5076	5159	5310	5311	6299	6608	6662	6772	7477	7484	7490	7849	10409	10736	26585	30812	54361	55083	55366	80144	342184	388585
GO:0003341	GO:CILIUM MOVEMENT	583	585	1767	1952	5991	8195	8382	8481	8701	23639	25809	25911	25981	26256	27019	27031	27148	29105	29922	53340	54768	54777	54919	54986	55036	55130	55582	55811	56171	64446	79582	83853	93233	115948	117144	122481	123872	126731	144535	161582	200162	200373	221421	284076	339829	345895	388389
GO:0003351	GO:EPITHELIAL CILIUM MOVEMENT	5991	8382	8481	23639	25809	25911	25981	26256	27031	27148	29922	53340	54986	55036	55582	55811	83853	122481	123872	339829	388389
GO:0003382	GO:EPITHELIAL CELL MORPHOGENESIS	652	1365	1499	2317	2625	2668	3209	3274	3397	3549	3976	4214	4233	4435	4855	5076	5879	6093	6299	6608	6768	6772	6781	6939	7484	7490	7849	8100	8324	8985	10409	10653	10736	11061	23022	23094	25932	26084	26585	54361	56288	57111	57493	57530	57669	64102	64919	79977	80781	122786	168002	196383	221037	338879	340547	353116
GO:0003401	GO:AXIS ELONGATION	374	652	2099	2246	2255	2263	3239	3371	4040	5469	5523	5754	6422	6423	6469	6495	6662	6928	7022	7040	7474	7481	9863	9968	10155	10252	10253	10413	51804	57216	85407	89780	157506	160418
GO:0003407	GO:NEURAL RETINA DEVELOPMENT	86	490	493	793	835	1261	1826	2780	2823	3549	3975	4760	5146	5663	5764	5797	6094	6096	6101	6121	6247	6496	6597	6604	6662	7020	7021	7070	8842	9497	10210	10265	10320	23554	24147	28996	30812	30813	51761	54549	54567	54806	54897	57010	57030	58158	84100	84465	112724	121643	204851	220202	221935	246213	256297	338917	348980
GO:0003416	GO:ENDOCHONDRAL BONE GROWTH	1297	1311	2121	2261	4146	4322	4488	4880	4921	5447	5914	5915	5916	6781	7048	7057	7059	9350	10498	54796	85301	344901
GO:0003417	GO:GROWTH PLATE CARTILAGE DEVELOPMENT	1297	1311	4146	4322	4880	5447	5914	5915	5916	6781	7048	7057	7059	9350	10498	85301
GO:0005976	GO:POLYSACCHARIDE METABOLIC PROCESS	147	160	178	207	208	801	805	808	1118	1213	1373	1950	2131	2132	2475	2538	2548	2632	2642	2645	2673	2887	2931	2932	2992	2997	2998	3036	3037	3038	3340	3479	3481	3572	3630	3643	3667	3795	4790	5155	5167	5213	5236	5255	5256	5257	5260	5261	5443	5499	5500	5501	5502	5504	5506	5507	5509	5734	5741	5834	5836	5837	6233	6934	7040	7262	7311	7314	7316	7360	7957	8445	8534	8660	8864	8908	8972	8987	9572	9852	10331	10580	10678	11041	23178	27159	27232	51294	51422	51763	53632	54187	55276	55454	55790	55829	55830	56052	56548	79369	79660	83468	83931	89792	89801	90673	114898	153743	374907	378884	648791	100507444
GO:0005977	GO:GLYCOGEN METABOLIC PROCESS	147	178	207	208	801	805	808	1373	2475	2538	2548	2632	2642	2645	2673	2887	2931	2932	2992	2997	2998	3479	3481	3572	3630	3643	3667	3795	5167	5213	5236	5255	5256	5257	5260	5261	5443	5499	5500	5501	5502	5504	5506	5507	5509	5741	5834	5836	5837	6233	6934	7262	7311	7314	7316	7360	7957	8445	8660	8864	8908	8987	9572	9852	10580	23178	27232	51294	51422	51763	53632	55276	55829	79660	83931	89801	90673	114898	153743	378884	648791	100507444
GO:0005978	GO:GLYCOGEN BIOSYNTHETIC PROCESS	178	207	208	2475	2632	2645	2673	2887	2931	2932	2992	2997	2998	3479	3481	3630	3643	3667	5167	5236	5260	5261	5499	5500	5507	5509	5741	6233	7311	7314	7316	7360	7957	8445	8660	8864	8908	9572	9852	10580	23178	51763	53632	55276	55829	79660	89801	90673	114898	378884	648791
GO:0005979	GO:REGULATION OF GLYCOGEN BIOSYNTHETIC PROCESS	207	208	2475	2645	2673	2887	2931	2932	3479	3481	3630	3643	3667	5167	5499	5500	5509	5741	8445	8660	9852	10580	23178	51763	55829	79660	89801	90673	114898	648791
GO:0005980	GO:GLYCOGEN CATABOLIC PROCESS	147	178	801	805	808	1373	2538	2548	2992	3630	5213	5236	5255	5256	5257	5260	5261	5499	5500	5509	5834	5836	5837	8908	8987	55276	79660	90673
GO:0005996	GO:MONOSACCHARIDE METABOLIC PROCESS	32	89	147	178	207	208	226	229	230	231	347	467	468	572	669	680	773	801	805	808	1196	1353	1374	1390	1407	1432	1468	1528	1727	1737	2023	2026	2027	2171	2203	2308	2475	2517	2519	2523	2524	2526	2527	2528	2529	2530	2538	2539	2542	2548	2582	2584	2585	2592	2597	2632	2641	2642	2645	2646	2648	2673	2683	2720	2729	2805	2806	2819	2820	2821	2822	2887	2908	2931	2932	2992	2997	2998	3098	3099	3101	3170	3172	3175	3479	3481	3486	3487	3488	3569	3630	3636	3643	3651	3667	3767	3795	3939	3952	3953	4041	4122	4123	4124	4125	4190	4191	4351	4886	4938	5071	5091	5105	5106	5160	5161	5162	5163	5164	5165	5166	5167	5207	5208	5209	5210	5211	5213	5214	5223	5224	5226	5230	5236	5255	5256	5257	5260	5261	5290	5313	5315	5366	5372	5443	5465	5467	5499	5500	5507	5509	5528	5562	5566	5567	5568	5581	5741	5771	5834	5836	5837	5903	5950	6095	6097	6120	6233	6513	6515	6576	6652	6714	6888	6934	7021	7086	7124	7157	7167	7262	7311	7314	7316	7355	7358	7360	7363	7364	7365	7366	7367	7368	7391	7915	7957	8277	8402	8445	8473	8534	8604	8660	8789	8790	8850	8864	8908	9104	9255	9370	9446	9563	9572	9852	9942	9962	9963	10165	10327	10499	10580	10690	10720	10776	10891	10941	10993	11164	11188	11266	23038	23169	23178	23275	23324	23411	23417	23509	26007	26330	27230	27232	27294	51084	51094	51181	51363	51451	51738	51763	54490	54575	54576	54577	54578	54579	54600	54657	54658	54659	54729	55276	55347	55578	55829	57001	57103	57223	57486	57818	64080	79660	79799	80201	83440	83667	84649	84750	84912	89792	89801	90007	90673	92579	114897	114898	114899	115209	119391	130589	133688	140710	145173	145264	150094	167127	200186	221927	282969	283209	283310	283450	283871	340990	378884	388581	390637	441531	648791	729020
GO:0006004	GO:FUCOSE METABOLIC PROCESS	2517	2519	2523	2524	2526	2527	2528	2529	2530	8790	10690	23275	23509	84750	145173	282969
GO:0006006	GO:GLUCOSE METABOLIC PROCESS	32	89	147	178	207	208	226	229	230	347	467	468	572	669	680	773	801	805	808	1196	1353	1374	1390	1407	1432	1468	1737	2023	2026	2027	2171	2203	2308	2475	2538	2539	2542	2548	2597	2632	2641	2642	2645	2646	2648	2673	2805	2806	2819	2820	2821	2822	2887	2908	2931	2932	2992	2997	2998	3098	3099	3101	3170	3172	3175	3479	3481	3486	3487	3488	3569	3630	3636	3643	3651	3667	3767	3795	3939	3952	3953	4041	4190	4191	4886	4938	5071	5091	5105	5106	5160	5161	5162	5163	5164	5165	5166	5167	5207	5208	5209	5210	5211	5213	5214	5223	5224	5230	5236	5255	5256	5257	5260	5261	5290	5313	5315	5366	5443	5465	5467	5499	5500	5507	5509	5528	5562	5566	5567	5568	5741	5771	5834	5836	5837	5903	5950	6095	6097	6233	6576	6652	6714	6934	7021	7124	7157	7167	7262	7311	7314	7316	7360	7391	7915	7957	8277	8402	8445	8473	8604	8660	8789	8850	8864	8908	9104	9255	9370	9563	9572	9852	10165	10327	10499	10580	10776	10891	10993	11188	11266	23038	23178	23411	23417	26330	27230	27232	51094	51181	51451	51738	51763	54729	55276	55578	55829	57001	57103	57223	57486	57818	79660	83440	83667	84649	84912	89801	90007	90673	92579	114897	114898	114899	115209	130589	140710	145264	150094	200186	221927	283209	283450	283871	378884	388581	390637	441531	648791
GO:0006007	GO:GLUCOSE CATABOLIC PROCESS	89	226	229	230	572	2023	2026	2027	2597	2645	2821	3098	3099	3101	3939	4041	5207	5208	5209	5210	5211	5213	5214	5223	5224	5230	5313	5315	5528	7157	7167	8277	26330	57103
GO:0006022	GO:AMINOGLYCAN METABOLIC PROCESS	160	176	207	284	411	633	960	1118	1213	1462	1463	1464	1486	1634	1836	1950	2131	2132	2134	2135	2137	2239	2247	2262	2296	2331	2517	2588	2651	2683	2719	2720	2799	2817	2990	3036	3037	3038	3073	3074	3082	3161	3339	3340	3373	3423	3425	3479	3553	3600	3697	3698	3699	3700	4060	4166	4288	4669	4790	4958	4969	5016	5155	5159	5292	5549	5734	6382	6383	6385	6448	6482	6483	6484	6487	6548	7040	7358	8372	8509	8534	8692	8702	8703	8704	8993	9060	9061	9331	9334	9348	9394	9435	9469	9653	9672	9806	9953	9955	9956	9957	10057	10082	10090	10331	10402	10675	10678	10855	10861	10894	11041	11046	11081	11227	11261	11285	22856	23169	23553	23563	26035	26229	27087	27159	29940	50515	50859	51000	51363	54360	54480	54928	54982	55454	55501	55576	55790	56548	57115	57214	60495	63827	64131	64132	64579	64711	66005	79369	79586	79625	80760	83539	89792	90161	92126	92370	93010	113189	114770	114771	124912	126792	129530	133584	135152	138050	166012	221914	222537	254773	283464	337876	347365	347734	374907	375790
GO:0006023	GO:AMINOGLYCAN BIOSYNTHETIC PROCESS	160	176	284	633	1213	1462	1463	1464	1634	1950	2131	2132	2134	2135	2137	2239	2262	2331	2651	2683	2719	2817	3036	3037	3038	3073	3339	3340	3373	3479	3553	4060	4166	4790	4958	4969	5155	5159	5549	5734	6382	6383	6385	6482	6483	6484	6487	7040	7358	8509	8534	8702	8703	8704	9331	9334	9348	9394	9435	9469	9653	9672	9953	9955	9956	9957	10057	10082	10090	10331	10402	10675	10678	11041	11046	11081	11227	11285	22856	23169	23563	26035	26229	27087	29940	50515	51363	54360	54480	55454	55501	55790	56548	57214	63827	64131	64132	64579	64711	79369	79586	83539	90161	92126	92370	93010	113189	126792	135152	166012	221914	222537	337876	374907	375790
GO:0006024	GO:GLYCOSAMINOGLYCAN BIOSYNTHETIC PROCESS	160	176	284	633	1213	1462	1463	1464	1634	1950	2131	2132	2134	2135	2137	2239	2262	2331	2651	2683	2719	2817	3036	3037	3038	3073	3339	3340	3373	3479	3553	4060	4166	4790	4958	4969	5155	5159	5549	5734	6382	6383	6385	6482	6483	6484	6487	7040	7358	8509	8534	8702	8703	8704	9331	9334	9348	9394	9435	9469	9653	9672	9953	9955	9956	9957	10057	10082	10090	10331	10402	10675	10678	11041	11046	11081	11227	11285	22856	23169	23563	26035	26229	27087	29940	50515	51363	54360	54480	55454	55501	55790	56548	57214	63827	64131	64132	64579	64711	79369	79586	83539	90161	92126	92370	93010	113189	126792	135152	166012	221914	222537	337876	375790
GO:0006026	GO:AMINOGLYCAN CATABOLIC PROCESS	176	411	633	960	1118	1462	1463	1464	1486	1634	2239	2247	2262	2331	2517	2588	2719	2720	2799	2817	2990	3073	3074	3161	3339	3373	3423	3425	4060	4669	4958	4969	5016	5549	6382	6383	6385	6448	6548	7040	8372	8692	8993	9672	10082	10675	10855	10894	11081	11261	23553	27159	55576	57115	57214	60495	63827	66005	114770	114771	124912	129530	138050	221914	254773	375790
GO:0006027	GO:GLYCOSAMINOGLYCAN CATABOLIC PROCESS	176	411	633	960	1462	1463	1464	1634	2239	2247	2262	2331	2517	2588	2719	2720	2799	2817	2990	3073	3074	3161	3339	3373	3423	3425	4060	4669	4958	4969	5549	6382	6383	6385	6448	6548	7040	8372	8692	8993	9672	10082	10675	10855	10894	11081	11261	23553	55576	57115	57214	60495	63827	114770	114771	124912	129530	138050	221914	254773	375790
GO:0006029	GO:PROTEOGLYCAN METABOLIC PROCESS	411	633	650	658	659	1280	1301	1462	1463	1464	1499	1634	2131	2132	2134	2135	2137	2239	2262	2300	2719	2817	3073	3074	3339	3340	3373	3423	3425	3479	3549	3990	5467	6382	6383	6385	6448	6934	8509	9348	9394	9469	9672	9806	9951	9953	10082	10090	10675	10855	11061	11285	22856	23169	23213	23553	26035	26229	27087	29940	50515	50859	51363	54360	54480	54928	55454	55501	55790	55959	56548	57216	63827	64131	64132	64377	64579	79586	79625	79690	81792	83539	89792	90161	92126	92370	113189	124583	126792	133584	135152	166012	221914	222537	266722	283464	337876	375790
GO:0006040	GO:AMINO SUGAR METABOLIC PROCESS	1118	1486	1798	2135	2673	4166	4245	4248	5016	5238	5973	6480	6482	6483	6675	8473	9215	9435	9945	10007	10020	10164	10724	23443	23563	27159	51005	55577	55790	55907	56548	64122	64841	66005	80896	91373	124872	132789	140838
GO:0006044	GO:N-ACETYLGLUCOSAMINE METABOLIC PROCESS	2135	4166	4248	5973	9215	9435	10007	10020	10164	10724	23563	51005	55577	56548	64841	132789	140838
GO:0006063	GO:URONIC ACID METABOLIC PROCESS	5581	6652	7358	7360	7363	7364	7365	7366	7367	7368	9942	10327	10720	10941	23169	51084	51181	54490	54575	54576	54577	54578	54579	54600	54657	54658	54659	55347	79799	133688	167127
GO:0006066	GO:ALCOHOL METABOLIC PROCESS	19	33	37	43	47	117	124	125	126	127	128	130	131	216	217	219	220	221	222	224	231	319	334	335	336	337	338	341	345	348	351	501	590	650	653	654	801	805	808	847	949	1040	1050	1056	1071	1080	1103	1119	1120	1201	1543	1545	1576	1581	1582	1583	1584	1585	1586	1588	1589	1591	1593	1594	1595	1622	1717	1718	1727	1798	2053	2055	2171	2181	2185	2222	2224	2230	2232	2235	2246	2247	2252	2539	2584	2629	2638	2672	2710	2712	2805	2820	2822	2852	3069	3156	3157	3158	3269	3292	3293	3357	3422	3458	3479	3553	3565	3612	3613	3628	3631	3632	3633	3635	3636	3638	3705	3706	3707	3778	3930	3931	3949	3952	3953	3973	3988	3990	3991	4036	4041	4047	4142	4204	4504	4597	4598	4790	4864	4923	4952	5028	5048	5105	5130	5168	5319	5320	5321	5322	5330	5331	5332	5333	5335	5336	5341	5444	5447	5449	5467	5562	5563	5580	5641	5724	5728	5745	5828	5950	5959	5978	6121	6256	6307	6309	6342	6526	6569	6591	6609	6610	6615	6622	6646	6647	6652	6653	6713	6718	6720	6721	6770	7108	7124	7167	7276	7292	7421	7436	7555	8029	8074	8398	8399	8431	8435	8542	8578	8605	8644	8694	8720	8811	8813	8818	8821	8854	8867	8877	8898	8912	9023	9108	9227	9249	9420	9453	9468	9517	9562	9619	9651	9663	9677	9784	9807	9971	10136	10162	10170	10390	10400	10449	10558	10577	10613	10654	10682	10858	10901	10908	10924	10948	11145	11160	11161	11163	11165	11315	22937	23007	23175	23236	23262	23436	23446	23541	23659	23780	26007	26119	26279	27122	27124	27235	27293	27329	29880	29881	29958	30814	50487	50640	50700	50814	51109	51141	51196	51302	51360	51422	51447	51477	51478	51700	51706	51744	51763	51805	53630	54361	54363	54884	54928	54947	54982	55190	55331	55349	55512	55586	55627	55809	55825	55902	55911	56623	56848	56994	57016	57153	57665	58488	64600	64768	64788	64801	64900	79644	79887	79888	80168	80271	80736	81537	81579	84532	84649	84650	89869	91734	112812	113026	114876	114879	116150	116255	116519	117283	120227	122618	123099	123745	125981	126969	129642	130367	133121	137964	142891	145226	145264	151056	154141	157506	158835	162466	166929	170685	171586	195814	204962	253430	254531	255189	255738	256356	259230	283748	283871	285440	339221	340485	346606	376497	100137049
GO:0006071	GO:GLYCEROL METABOLIC PROCESS	2710	2712	2805	2820	3952	5105	7167	26007	27235	27329	51805	80168	84649	116255	256356	283871	346606
GO:0006073	GO:CELLULAR GLUCAN METABOLIC PROCESS	147	178	207	208	801	805	808	1373	2475	2538	2548	2632	2642	2645	2673	2887	2931	2932	2992	2997	2998	3479	3481	3572	3630	3643	3667	3795	5167	5213	5236	5255	5256	5257	5260	5261	5443	5499	5500	5501	5502	5504	5506	5507	5509	5741	5834	5836	5837	6233	6934	7262	7311	7314	7316	7360	7957	8445	8660	8864	8908	8972	8987	9572	9852	10580	23178	27232	51294	51422	51763	53632	55276	55829	79660	83931	89801	90673	114898	153743	378884	648791	100507444
GO:0006081	GO:CELLULAR ALDEHYDE METABOLIC PROCESS	127	128	189	216	218	220	221	223	224	229	275	501	593	594	669	1545	1610	1629	1645	1737	1738	1743	2098	2539	2653	2731	2739	2821	3029	3417	3418	3795	4706	4967	5160	5162	5223	5224	5226	5970	6120	6121	6888	7086	7167	8050	8566	8574	8644	8854	9380	9563	10327	11019	11315	22934	22977	23729	25796	25953	26007	51071	51109	51601	53630	54363	55163	55276	55526	55818	57016	57026	57103	64577	64902	83875	112817	157506	195814	347862	387787	441531	729020
GO:0006084	GO:ACETYL-COA METABOLIC PROCESS	31	32	47	1737	1738	1743	2194	4597	4598	5160	5161	5162	5163	5164	5165	5166	6999	8050	8942	10157	10654	23417	25874	51166	51268	54704	55066	55902	57546	84532	134526	283927
GO:0006085	GO:ACETYL-COA BIOSYNTHETIC PROCESS	47	1737	1738	5160	5161	5162	5163	5164	5165	5166	8050	23417	25874	54704	55066	55902	57546	84532
GO:0006090	GO:PYRUVATE METABOLIC PROCESS	89	189	226	229	230	405	669	682	863	957	1737	1738	2023	2026	2027	2203	2597	2645	2739	2819	2821	3029	3064	3091	3098	3099	3101	3356	3479	3630	3643	3939	3945	3948	4656	4967	5027	5091	5105	5160	5161	5162	5163	5164	5165	5166	5207	5208	5209	5210	5211	5213	5214	5223	5224	5230	5232	5236	5313	5315	5465	5528	5562	5563	5571	6566	6774	7157	7167	8013	8050	8473	8870	9123	9611	9759	10873	10891	10993	11319	23539	25874	26330	51085	51422	51548	51660	54541	54704	55066	55526	55753	57103	57546	63826	80201	83440	92483	112817	134526	387712	441531
GO:0006091	GO:GENERATION OF PRECURSOR METABOLITES AND ENERGY	31	32	37	47	48	50	51	89	107	108	109	111	112	113	114	115	147	150	152	155	158	178	204	207	208	226	229	230	291	292	293	345	364	402	405	434	498	506	509	513	514	515	516	517	518	521	522	538	539	551	552	581	664	669	773	775	776	777	801	805	808	847	862	863	957	1050	1131	1327	1329	1337	1339	1340	1345	1346	1349	1350	1351	1352	1355	1373	1431	1534	1537	1544	1737	1738	1743	2023	2026	2027	2108	2109	2110	2194	2203	2232	2235	2271	2395	2475	2538	2548	2597	2631	2632	2641	2642	2645	2647	2673	2696	2740	2778	2782	2783	2784	2785	2786	2787	2788	2790	2791	2819	2821	2847	2864	2887	2931	2932	2992	2997	2998	3091	3098	3099	3101	3356	3417	3418	3419	3420	3421	3479	3481	3572	3630	3643	3651	3667	3708	3709	3710	3745	3747	3767	3790	3795	3939	3952	3953	4082	4160	4190	4191	4204	4436	4504	4609	4656	4694	4695	4696	4697	4698	4700	4701	4702	4704	4705	4706	4707	4708	4709	4710	4711	4712	4713	4714	4715	4716	4717	4718	4719	4720	4722	4723	4724	4725	4726	4728	4729	4731	4775	4776	4843	4899	4967	4986	5018	5027	5160	5161	5162	5167	5207	5208	5209	5210	5211	5213	5214	5223	5224	5230	5232	5236	5250	5255	5256	5257	5260	5261	5290	5313	5315	5443	5465	5467	5499	5500	5501	5502	5504	5506	5507	5509	5528	5562	5563	5565	5566	5567	5568	5571	5573	5575	5576	5577	5578	5741	5834	5836	5837	5906	6233	6341	6389	6390	6391	6392	6507	6513	6514	6616	6622	6774	6794	6804	6812	6833	6834	6844	6861	6888	6901	6934	6945	7086	7157	7167	7262	7311	7314	7316	7349	7350	7351	7352	7360	7381	7384	7385	7386	7388	7415	7425	7915	7957	8013	8445	8473	8604	8660	8801	8802	8803	8826	8864	8870	8908	8987	9016	9167	9238	9254	9365	9370	9377	9481	9495	9512	9551	9572	9611	9650	9759	9852	9942	9945	9997	10007	10063	10105	10131	10165	10229	10411	10476	10514	10554	10580	10632	10873	10891	10975	11069	11232	11315	11319	22868	23178	23410	23530	23568	25915	26251	26330	27089	27109	27166	27232	28976	29078	29103	29796	51052	51079	51085	51103	51167	51294	51295	51300	51422	51548	51763	51764	53632	54205	54331	54539	54541	54677	54729	54949	55022	55276	55471	55526	55753	55829	55847	55863	55967	55970	56181	56964	57017	57103	59345	60493	63976	65018	79072	79085	79133	79178	79660	79675	79736	80025	80201	80224	83440	83931	83943	84269	84273	84275	84300	84701	87178	89801	90480	90639	90673	91942	93974	94235	112464	112609	113115	114789	114898	116228	116285	126328	130752	131474	137682	153743	163747	196883	221264	221395	341947	374291	378884	387712	388753	400916	440567	441531	648791	790955	100507444	100532726
GO:0006094	GO:GLUCONEOGENESIS	226	229	230	467	468	669	1196	1407	1468	2023	2026	2027	2203	2308	2538	2597	2641	2645	2648	2805	2806	2819	2820	2821	2908	3172	3569	3630	3952	3953	4190	4191	5091	5105	5106	5164	5207	5223	5224	5230	5236	5465	5566	5567	5568	5771	5903	5950	6576	6934	7167	8402	8473	8604	8789	8850	8864	9370	9572	10165	10776	10891	10993	26330	27232	55578	55829	57001	57223	57486	57818	83667	84649	84912	92579	114899	140710	145264	150094	200186	283871	388581	441531
GO:0006096	GO:GLYCOLYTIC PROCESS	89	226	229	230	405	669	863	957	2023	2026	2027	2203	2597	2645	2819	2821	3091	3098	3099	3101	3356	3479	3630	3643	3939	4656	4967	5027	5207	5208	5209	5210	5211	5213	5214	5223	5224	5230	5232	5236	5313	5315	5465	5528	5562	5563	5571	6774	7157	7167	8473	8870	9611	9759	10891	11319	26330	51085	51422	51548	54541	55526	55753	57103	80201	83440	387712	441531
GO:0006098	GO:PENTOSE-PHOSPHATE SHUNT	669	2539	5223	5224	5226	6120	6888	7086	7167	9563	22934	23729	25796	51071	55276	57103	441531	729020
GO:0006099	GO:TRICARBOXYLIC ACID CYCLE	48	50	1431	1737	1738	1743	2271	3417	3418	3419	3420	3421	4190	4191	4967	5160	5161	5162	6389	6390	6391	6392	8801	8802	8803	23530	55526	55753	130752
GO:0006101	GO:CITRATE METABOLIC PROCESS	47	48	50	1431	1737	1738	1743	2271	2690	3417	3418	3419	3420	3421	4190	4191	4967	5160	5161	5162	6389	6390	6391	6392	6776	6777	8801	8802	8803	23530	55526	55753	130752
GO:0006103	GO:2-OXOGLUTARATE METABOLIC PROCESS	1738	1743	2690	2805	2806	3417	3418	3420	3421	4967	6776	6777	6898	51166	56267	79944	84706	92259	137872	728294
GO:0006109	GO:REGULATION OF CARBOHYDRATE METABOLIC PROCESS	32	89	117	147	160	207	208	405	572	669	863	957	1196	1213	1353	1950	2185	2203	2218	2308	2475	2641	2642	2645	2646	2648	2673	2801	2819	2822	2852	2887	2908	2931	2932	3037	3091	3170	3172	3269	3356	3479	3481	3486	3487	3488	3569	3600	3630	3643	3667	3795	3952	3953	3973	4142	4504	4656	4790	4923	5027	5028	5071	5155	5163	5164	5165	5166	5167	5207	5208	5223	5224	5261	5341	5366	5443	5449	5465	5499	5500	5509	5562	5563	5571	5581	5724	5734	5741	5745	5771	5903	6095	6097	6622	6714	6774	6934	7040	7157	7262	8445	8473	8660	8850	8870	9104	9370	9528	9572	9611	9759	9852	9933	9971	10267	10499	10565	10580	10776	10891	11261	11266	11319	22877	23178	23394	23411	23417	26277	26330	27232	51085	51094	51422	51451	51548	51744	51763	54541	54575	54576	54577	54578	54600	54657	54658	54659	54729	55578	55829	57001	57103	57223	57486	79660	83667	84649	84912	89801	90007	90673	114897	114898	114899	123264	140710	145264	150094	283871	340485	388581	441531	648791
GO:0006110	GO:REGULATION OF GLYCOLYTIC PROCESS	89	405	863	957	2203	2645	2819	3091	3356	3479	3630	3643	4656	5027	5223	5465	5562	5563	5571	6774	7157	8473	8870	9611	9759	10891	11319	26330	51085	51422	51548	54541	57103
GO:0006111	GO:REGULATION OF GLUCONEOGENESIS	1196	2203	2308	2641	2645	2648	2908	3172	3569	3630	3952	3953	5164	5465	5771	5903	6934	8473	8850	9370	9572	10776	10891	27232	55578	55829	57001	57223	57486	83667	84649	84912	114899	140710	145264	150094	283871	388581
GO:0006112	GO:ENERGY RESERVE METABOLIC PROCESS	31	32	47	107	108	109	111	112	113	114	115	147	150	152	155	178	207	208	291	292	293	402	773	775	776	777	801	805	808	1131	1373	2194	2475	2538	2548	2632	2641	2642	2645	2673	2740	2778	2782	2783	2784	2785	2786	2787	2788	2790	2791	2864	2887	2931	2932	2992	2997	2998	3479	3481	3572	3630	3643	3667	3708	3709	3710	3745	3747	3767	3790	3795	3952	3953	4082	4160	4504	4609	5167	5207	5213	5236	5255	5256	5257	5260	5261	5313	5443	5499	5500	5501	5502	5504	5506	5507	5509	5528	5563	5565	5566	5567	5568	5573	5575	5576	5577	5578	5741	5834	5836	5837	5906	6233	6513	6514	6616	6794	6804	6812	6833	6844	6861	6888	6934	6945	7086	7262	7311	7314	7316	7360	7957	8445	8660	8826	8864	8908	8987	9254	9365	9495	9572	9852	9945	10411	10554	10580	11069	23178	23568	26251	27232	51052	51085	51294	51422	51763	51764	53632	54331	55022	55276	55829	55970	59345	79660	83931	89801	90673	94235	112609	114898	153743	196883	221395	378884	648791	100507444
GO:0006119	GO:OXIDATIVE PHOSPHORYLATION	89	204	345	509	513	538	1327	1351	1352	1355	1738	2395	2631	4204	4436	4656	4694	4695	4696	4697	4698	4700	4701	4702	4704	4705	4706	4707	4708	4709	4710	4711	4712	4713	4714	4715	4716	4717	4718	4719	4720	4722	4723	4724	4725	4726	4728	4729	4731	6391	6622	6834	6901	7381	7384	7385	7388	7415	9377	9512	10105	10229	11315	29103	29796	51085	51103	54205	54949	57017	65018	79085	79736	84275	84300	84701	90480	163747	341947	374291	388753	400916	440567	790955	100532726
GO:0006120	GO:MITOCHONDRIAL ELECTRON TRANSPORT, NADH TO UBIQUINONE	1738	4694	4695	4696	4697	4698	4700	4701	4702	4704	4705	4706	4707	4708	4709	4710	4711	4712	4713	4714	4715	4716	4717	4718	4719	4720	4722	4723	4724	4725	4726	4728	4729	4731	6622	11315	29103	51103	57017	65018	374291	100532726
GO:0006140	GO:REGULATION OF NUCLEOTIDE METABOLIC PROCESS	19	49	89	113	116	117	133	135	136	150	153	154	155	333	345	348	405	538	551	554	669	706	796	799	801	805	808	863	957	978	1113	1392	1394	1395	1812	1813	1814	1815	1816	1889	1902	1906	1909	1910	2185	2203	2492	2535	2550	2587	2641	2645	2691	2692	2696	2740	2771	2773	2774	2778	2819	2833	2852	2912	2913	2917	2918	2931	2977	2978	2979	2980	2981	2982	3091	3208	3351	3354	3356	3479	3627	3630	3640	3643	3973	4157	4158	4159	4160	4161	4199	4200	4283	4543	4544	4656	4763	4842	4843	4846	4880	4881	4883	4887	4914	4915	4987	4988	5027	5032	5064	5138	5144	5196	5223	5224	5311	5465	5562	5563	5571	5578	5598	5733	5734	5739	5741	5744	5894	5957	6019	6343	6373	6622	6754	6774	7057	7077	7157	7253	7349	7415	7422	7432	7434	7466	7474	8473	8477	8484	8654	8811	8870	9472	9495	9568	9590	9611	9626	9759	10059	10105	10203	10266	10267	10399	10411	10486	10487	10886	10891	10900	11315	11319	23394	23432	23746	26330	29103	51085	51422	51548	53829	53836	54541	54583	55022	56246	56413	57103	65018	79085	79718	79849	80184	84275	84300	90480	93974	112609	122042	163747	165140	201163	283383	344901	441531	729230
GO:0006144	GO:PURINE NUCLEOBASE METABOLIC PROCESS	55	100	132	158	159	270	271	272	316	353	471	847	1633	1716	1806	2618	2766	2876	3251	3553	3614	3615	4860	4907	5198	5471	5631	6470	7498	8833	9615	10606	22978	30833	51292	51816	64077	84618	93034	122622	161823	646625
GO:0006163	GO:PURINE NUCLEOTIDE METABOLIC PROCESS	19	31	32	49	89	100	107	108	109	111	112	113	114	115	116	117	132	133	135	136	150	153	154	155	158	159	203	204	205	226	229	230	270	271	272	333	345	348	353	358	405	471	477	481	491	498	506	509	513	514	515	516	517	518	521	522	523	525	526	535	538	539	551	554	572	669	706	785	796	799	801	805	808	847	863	957	1113	1327	1351	1352	1355	1392	1394	1395	1497	1716	1738	1739	1740	1741	1742	1812	1813	1814	1815	1816	1836	1889	1902	1906	1909	1910	2023	2026	2027	2185	2203	2272	2395	2492	2535	2550	2587	2597	2618	2631	2641	2645	2691	2692	2696	2740	2766	2771	2773	2774	2778	2819	2821	2833	2852	2876	2912	2913	2917	2918	2931	2977	2978	2979	2980	2981	2982	2983	2984	2986	2987	3000	3091	3094	3098	3099	3101	3156	3208	3251	3303	3304	3312	3351	3354	3356	3357	3358	3479	3614	3615	3627	3630	3640	3643	3704	3939	3948	3973	4157	4158	4159	4160	4161	4204	4283	4350	4354	4355	4356	4436	4521	4522	4543	4544	4595	4621	4622	4624	4625	4626	4656	4694	4695	4696	4697	4698	4700	4701	4702	4704	4705	4706	4707	4708	4709	4710	4711	4712	4713	4714	4715	4716	4717	4718	4719	4720	4722	4723	4724	4725	4726	4728	4729	4731	4763	4830	4831	4832	4833	4842	4843	4846	4860	4878	4879	4880	4881	4882	4883	4887	4907	4914	4915	4938	4939	4967	4968	4987	4988	5027	5032	5064	5138	5139	5140	5141	5142	5143	5144	5145	5150	5151	5152	5153	5158	5167	5196	5198	5207	5208	5209	5210	5211	5213	5214	5223	5224	5230	5232	5236	5311	5313	5315	5465	5471	5528	5562	5563	5571	5578	5598	5631	5634	5733	5734	5739	5741	5744	5894	5957	6019	6095	6343	6373	6391	6622	6754	6774	6783	6799	6817	6818	6819	6820	6822	6834	6901	7040	7057	7077	7157	7167	7253	7349	7381	7384	7385	7388	7415	7422	7432	7434	7466	7474	7498	8382	8473	8477	8484	8573	8622	8654	8811	8833	8870	9060	9061	9377	9414	9472	9495	9512	9551	9568	9590	9605	9611	9615	9626	9759	10059	10105	10165	10201	10203	10229	10266	10267	10312	10380	10399	10411	10476	10486	10487	10606	10632	10846	10861	10886	10891	10900	11315	11319	11332	22978	23394	23417	23432	23433	23545	23746	25830	25939	26289	26330	27109	27115	27233	27284	29103	29789	29796	29922	30833	30968	50617	50808	50940	51000	51085	51103	51292	51314	51422	51548	53343	53354	53829	53836	54205	54541	54583	54677	54949	55022	55229	55270	55526	55753	55811	56246	56413	57017	57103	60490	63979	64087	65018	65220	79085	79646	79717	79718	79736	79849	79873	79877	80025	80184	80201	80347	83440	84275	84300	84433	84618	84693	84701	84836	90226	90480	93034	93974	112609	114789	120892	122042	122622	131870	134864	163747	165140	196883	201163	221264	260425	267020	283383	283458	283927	341947	344901	347734	347736	374291	374659	387712	388753	400916	432369	440567	441024	441531	729230	790955	100532726
GO:0006164	GO:PURINE NUCLEOTIDE BIOSYNTHETIC PROCESS	19	31	32	49	100	107	108	109	111	112	113	114	115	116	117	132	133	135	136	150	153	154	155	158	159	203	204	205	226	270	271	272	333	348	353	358	471	498	506	509	513	514	515	516	517	518	521	522	535	539	551	554	796	799	801	805	808	1392	1394	1395	1812	1813	1814	1815	1816	1836	1889	1902	1906	1909	1910	2185	2492	2550	2587	2618	2631	2641	2691	2692	2696	2740	2771	2773	2774	2778	2852	2912	2913	2917	2918	2931	2977	2978	2979	2980	2981	2982	2983	2984	2986	2987	3000	3208	3251	3351	3357	3358	3614	3615	3640	3948	3973	4157	4158	4159	4160	4161	4522	4543	4763	4830	4831	4832	4833	4842	4843	4846	4878	4879	4880	4881	4882	4883	4887	4907	4914	4915	4938	4939	4987	4988	5032	5064	5138	5198	5313	5315	5471	5578	5631	5634	5733	5734	5739	5741	5744	5894	5957	6019	6343	6774	6834	7040	7077	7253	7349	7415	7432	7434	7466	8382	8477	8484	8811	8833	9060	9061	9472	9495	9551	9568	9590	9605	9626	10165	10201	10203	10266	10267	10312	10476	10486	10487	10606	10632	10861	10886	10891	10900	11332	23394	23432	23545	26289	27109	29922	30968	50617	50808	51000	51314	51422	53354	53829	53836	55022	55229	55811	56246	56413	60490	65018	79646	79717	79849	79877	80025	80347	90226	112609	122042	122622	134864	165140	196883	201163	221264	267020	283383	283458	344901	347734	347736	400916	432369	441024	729230	790955
GO:0006165	GO:NUCLEOSIDE DIPHOSPHATE PHOSPHORYLATION	89	203	205	226	229	230	405	669	863	957	2023	2026	2027	2203	2597	2645	2819	2821	3091	3098	3099	3101	3356	3479	3630	3643	3939	4656	4830	4831	4832	4833	4967	5027	5207	5208	5209	5210	5211	5213	5214	5223	5224	5230	5232	5236	5313	5315	5465	5528	5562	5563	5571	6774	7157	7167	8382	8473	8870	9611	9759	10201	10891	11319	26289	26330	29922	51085	51314	51422	51548	51727	54541	55526	55753	57103	80201	83440	122481	129607	158067	221264	283458	347736	387712	441531
GO:0006171	GO:CAMP BIOSYNTHETIC PROCESS	19	49	107	108	109	111	112	113	114	115	116	117	133	135	136	150	153	154	155	333	551	554	796	799	801	805	808	1392	1394	1395	1812	1813	1814	1815	1816	1889	1902	1906	1909	1910	2492	2550	2587	2641	2691	2692	2696	2740	2771	2773	2774	2778	2852	2912	2913	2917	2918	2931	3208	3351	3640	3973	4157	4158	4159	4160	4161	4763	4883	4887	4914	4915	4987	4988	5032	5064	5138	5578	5733	5734	5739	5741	5744	5894	6019	6343	7077	7253	7349	7432	7434	7466	8477	8484	8811	9472	9495	9568	9590	10203	10266	10267	10486	10487	10886	23432	53829	53836	55811	56246	56413	90226	112609	122042	134864	165140	196883	283383	729230
GO:0006182	GO:CGMP BIOSYNTHETIC PROCESS	136	348	358	2185	2977	2978	2979	2980	2981	2982	2983	2984	2986	3000	3208	3357	3358	4543	4842	4843	4846	4878	4879	4880	4881	4882	5957	9626	10900	23394	79849	344901
GO:0006195	GO:PURINE NUCLEOTIDE CATABOLIC PROCESS	89	100	272	847	2876	3094	3251	3704	4350	4521	4595	4860	4907	4968	5138	5139	5140	5141	5142	5143	5144	5150	5151	5152	5153	5598	7157	7498	8622	8654	9615	10399	10411	10846	22978	23417	25939	27115	30833	50940	53343	54583	55270	57103	79873	84618	93034	131870	283927
GO:0006198	GO:CAMP CATABOLIC PROCESS	5138	5139	5140	5141	5142	5143	5144	5150	5151	5153	5598	8622	10399	10411	10846	27115	50940	54583
GO:0006206	GO:PYRIMIDINE NUCLEOBASE METABOLIC PROCESS	790	978	1373	1633	1635	1723	1806	1807	1854	1890	2475	4329	4907	5594	6240	7083	7084	7298	7371	7372	7378	8226	30833	51251	51727	51733	54790	54963	56953	64902	83549	84618	139596	151531
GO:0006213	GO:PYRIMIDINE NUCLEOSIDE METABOLIC PROCESS	339	790	978	1503	1633	1635	1723	1806	1807	1854	1890	2079	4830	4831	4832	4833	4907	7083	7084	7298	7371	7372	7378	8226	8382	9583	10201	10930	27350	29922	30833	50808	51251	51314	51727	51733	54963	56474	56953	57379	60489	64902	83549	84618	139596	151531	164668	200315	200316	200895	283458	347736
GO:0006220	GO:PYRIMIDINE NUCLEOTIDE METABOLIC PROCESS	790	1503	1633	1635	1723	1841	1854	1890	2079	4830	4831	4832	4833	4913	4968	5631	6470	6996	7298	7371	7372	7374	7378	8382	8930	9519	9583	10201	23583	26289	29922	30833	50808	51314	51727	54963	56474	56953	64006	79661	83549	129607	139596	151531	252969	283458	347736	100506422
GO:0006221	GO:PYRIMIDINE NUCLEOTIDE BIOSYNTHETIC PROCESS	790	1503	1723	1841	1854	2079	4830	4831	4832	4833	5631	6470	7298	7371	7372	7378	8382	9519	10201	26289	29922	51314	51727	54963	56474	83549	129607	139596	151531	283458	347736
GO:0006260	GO:DNA REPLICATION	43	94	142	150	328	374	466	472	545	546	641	652	653	654	672	675	811	898	908	983	990	993	995	997	998	1017	1025	1111	1437	1471	1499	1602	1736	1763	1854	1877	1890	1950	1956	2056	2069	2237	2255	2272	2658	2735	2736	3060	3159	3178	3183	3192	3265	3364	3399	3479	3480	3508	3562	3569	3630	3643	3725	3978	3980	4142	4171	4172	4173	4174	4175	4176	4216	4221	4254	4361	4673	4678	4683	4751	4771	4774	4781	4782	4784	4796	4928	4931	4998	4999	5000	5001	5111	5154	5155	5156	5319	5371	5422	5423	5424	5425	5426	5427	5428	5429	5468	5478	5515	5518	5557	5558	5570	5588	5594	5595	5609	5763	5810	5813	5879	5883	5884	5888	5928	5930	5931	5937	5976	5980	5981	5982	5983	5984	5985	6117	6118	6119	6240	6241	6282	6418	6419	6464	6714	6742	6749	6950	7011	7013	7014	7015	7019	7040	7043	7084	7126	7150	7157	7203	7270	7349	7486	7884	8099	8208	8243	8317	8318	8550	8658	8882	8888	9093	9126	9134	9212	9314	9400	9401	9768	9837	9984	10036	10038	10039	10111	10189	10361	10432	10445	10535	10574	10575	10576	10638	10694	10714	10715	10721	10728	10735	10919	10926	11143	11177	11198	11200	11201	11232	11277	11284	22944	22948	23054	23063	23244	23293	23381	23411	23560	23594	23595	23649	25849	25913	25942	26057	26277	26585	27000	27343	29803	29935	30968	50484	50485	51053	51147	51426	51455	51514	51550	51659	51750	54107	54386	54433	54552	54617	54921	54962	54984	55022	55035	55135	55226	55294	55388	55505	55651	55704	56034	56652	56897	56953	57697	57804	58525	59343	63901	63922	63967	64006	64061	64785	65057	79075	79618	79733	79892	79977	79991	80010	80119	80169	80174	80351	81620	84083	84126	84268	84275	84289	84296	84464	84515	84893	84897	85456	90381	91603	92667	92675	92797	114799	116028	116447	140609	144455	144715	146059	157570	157777	201254	201973	222229	225689	246243	253461	253714	253980	254394	259282	283899	339221	345643	346673	353497	378708	449619	619465	647309	100128274	100133495	100134934	100616101	100862688
GO:0006261	GO:DNA-DEPENDENT DNA REPLICATION	142	328	546	641	652	653	654	675	898	990	997	1017	1025	1602	1763	2237	3159	3978	3980	4171	4172	4173	4174	4175	4176	4361	4683	4796	4998	4999	5000	5001	5111	5422	5423	5424	5425	5426	5427	5428	5557	5558	5813	5888	5976	5980	5981	5982	5983	5984	5985	6117	6118	6119	6419	7013	7014	7019	7084	7486	7884	8099	8243	8317	8318	8882	9093	9126	9134	9837	9984	10038	10039	10189	10535	10714	10721	10735	11177	11200	11232	11284	23594	23649	29935	30968	50484	50485	51659	51750	54617	54962	55022	55294	55388	56652	56897	57697	57804	58525	59343	64785	79733	79892	80174	81620	84083	84268	84275	84296	84515	84893	90381	91603	92667	92797	144455	201254	201973	222229	246243	253714	259282	353497	378708	647309
GO:0006266	GO:DNA LIGATION	142	2547	3146	3148	3978	3980	3981	4255	5888	7153	7518	10038	10039	24144	54840	200558	286257
GO:0006270	GO:DNA REPLICATION INITIATION	898	990	997	1017	4171	4172	4173	4174	4175	4176	4683	4998	4999	5000	5001	5422	5426	5427	5557	5558	5813	8317	8318	9134	23649	29935	51659	55388	56897	81620	84296	90381	222229	647309
GO:0006271	GO:DNA STRAND ELONGATION INVOLVED IN DNA REPLICATION	142	328	1763	2237	3978	4171	4172	4173	4174	4175	4176	5111	5422	5424	5425	5557	5558	5981	5982	5983	5984	5985	6117	6118	6119	8318	9837	10038	10039	10535	10714	23649	51659	57804	64785	84296	84515	246243
GO:0006275	GO:REGULATION OF DNA REPLICATION	94	374	466	472	545	546	641	652	653	654	675	811	908	983	990	998	1017	1437	1471	1499	1602	1736	1763	1956	2056	2069	2255	2658	2735	2736	3060	3178	3183	3192	3265	3364	3399	3479	3480	3562	3569	3630	3643	3725	3980	4142	4216	4221	4254	4361	4683	4751	4771	4931	5111	5154	5155	5156	5319	5371	5468	5515	5518	5570	5588	5594	5595	5609	5879	5884	5930	6282	6464	6714	6950	7013	7014	7040	7043	7126	7157	7203	7270	7349	8243	8317	8550	8658	9126	9212	9314	10361	10445	10574	10575	10576	10694	10715	10735	10919	11200	11284	22948	23063	23244	23293	23381	23560	25849	25913	26057	26277	26585	30968	51053	54552	54617	54962	54984	55022	55135	55226	55294	55704	56034	56897	58525	59343	64061	65057	79075	79618	79733	79977	79991	80119	80169	80174	80351	81620	84083	84893	90381	91603	114799	140609	144455	146059	157570	225689	253461	253980	339221	345643	100134934
GO:0006278	GO:RNA-DEPENDENT DNA REPLICATION	472	545	908	1499	1736	3178	3183	3192	4216	4361	4751	5371	5478	5570	5588	5594	5595	5609	5981	6714	6950	7011	7013	7014	7015	7203	8550	8658	9212	10111	10574	10575	10576	10694	10728	11284	22948	23293	23381	25913	26277	54386	54433	54552	54984	55135	55226	55505	55651	64006	65057	79618	79991	80119	80351	85456	140609	225689	449619	619465	100128274	100133495	100616101	100862688
GO:0006281	GO:DNA REPAIR	25	86	142	143	322	328	472	545	546	571	580	641	672	675	902	983	988	1017	1022	1025	1032	1054	1069	1111	1137	1161	1453	1454	1642	1643	1647	1653	1763	1956	2033	2067	2068	2070	2071	2072	2073	2074	2138	2139	2140	2175	2176	2177	2178	2187	2188	2189	2237	2255	2305	2475	2547	2873	2956	2965	2966	2967	2968	3014	3146	3148	3150	3159	3364	3508	3835	3838	3978	3980	3981	4157	4221	4255	4287	4292	4331	4350	4361	4436	4437	4521	4595	4683	4796	4798	4841	4862	4869	4913	4968	5111	5371	5378	5379	5383	5387	5395	5422	5423	5424	5425	5426	5427	5428	5429	5430	5431	5432	5433	5434	5435	5436	5437	5438	5439	5440	5441	5531	5536	5582	5591	5599	5810	5883	5884	5885	5886	5887	5888	5889	5890	5892	5893	5932	5965	5976	5980	5981	5982	5983	5984	5985	6047	6117	6118	6119	6188	6233	6419	6421	6596	6598	6612	6613	6749	6847	6917	6996	7014	7141	7156	7157	7158	7161	7291	7311	7314	7316	7318	7319	7320	7323	7329	7334	7335	7336	7341	7353	7374	7398	7405	7415	7468	7486	7507	7508	7515	7516	7517	7518	7520	7528	7706	7832	7874	7913	7979	8091	8208	8243	8290	8294	8295	8313	8317	8318	8359	8360	8361	8362	8363	8364	8365	8366	8367	8368	8370	8438	8450	8451	8467	8505	8533	8555	8607	8846	8870	8914	8924	8930	9025	9031	9100	9112	9126	9156	9232	9246	9318	9319	9320	9400	9401	9557	9577	9636	9643	9656	9665	9682	9716	9768	9907	9937	9960	9978	9985	10036	10038	10039	10075	10111	10155	10213	10273	10309	10432	10445	10450	10459	10463	10519	10524	10535	10635	10714	10721	10856	10920	10933	10973	10980	10987	11044	11073	11144	11198	11200	11201	11219	11232	11277	11284	22890	22897	22909	22944	22976	22992	23028	23030	23049	23054	23064	23137	23198	23411	23503	23514	23583	24144	25788	25842	25898	25988	26122	26270	27030	27033	27301	27339	27343	27434	28990	29072	29086	29089	29128	29844	29935	50484	50511	50813	51008	51065	51138	51343	51347	51366	51377	51426	51444	51455	51514	51548	51550	51567	51588	51659	51720	51750	54386	54617	54778	54780	54840	54891	54929	54962	55010	55031	55120	55137	55159	55170	55183	55215	55247	55284	55317	55339	55611	55666	55693	55719	55775	55929	56154	56158	56160	56647	56852	56897	56916	56946	56949	57103	57332	57461	57551	57599	57646	57654	57697	57804	58493	63967	63979	64210	64421	64708	64789	64858	64859	65123	79008	79035	79068	79184	79661	79677	79728	79840	79913	80010	80119	80198	80233	80820	83444	83666	83695	83932	83990	84083	84126	84142	84164	84250	84268	84296	84464	84515	84690	84893	84939	85015	90381	91419	91442	91603	91875	92667	92815	93973	113130	113510	116028	119392	121504	121642	124739	125150	125476	126074	131474	131870	133746	135458	140739	144715	146956	147872	148581	151636	151987	157570	165918	197342	197370	199720	199990	200558	201254	201973	221120	252969	253714	254225	254394	254528	257218	259282	283899	284131	286053	286257	348654	353497	375748	375757	378708	389898	401720	404672	441194	493861	548593	554313	642636	728340	730394	100133315	102800317	107161145
GO:0006282	GO:REGULATION OF DNA REPAIR	142	322	328	672	1025	1054	1111	1161	1956	2138	2140	2255	2305	3014	3146	4255	4862	4968	5111	5371	5429	5531	5582	5888	5893	6118	6188	6419	7014	7291	7334	7335	7336	7398	7468	7913	8091	8313	8451	8870	9025	9320	9577	10155	10635	10721	23028	23411	23514	24144	29086	51366	51548	51720	51750	54386	54929	55010	55137	55183	55611	55693	55719	56154	57103	57332	63979	79184	84142	84250	84893	131870	151987	165918	254225	401720
GO:0006283	GO:TRANSCRIPTION-COUPLED NUCLEOTIDE-EXCISION REPAIR	902	1022	1161	1642	2033	2067	2068	2071	2072	2073	2074	2873	2965	2966	2967	2968	3150	3978	3980	4331	5111	5424	5425	5430	5431	5432	5433	5434	5435	5436	5437	5438	5439	5440	5441	5981	5982	5983	5984	5985	6117	6118	6119	6233	6917	7311	7314	7316	7507	7515	7874	8450	8451	8533	9318	9716	9978	10450	10714	10920	10980	10987	27339	50813	51138	51426	56949	57461	57654	57804	64708	91603	404672
GO:0006284	GO:BASE-EXCISION REPAIR	142	328	1763	2074	2237	3146	3159	3978	3980	4350	4595	4913	4968	5111	5423	5424	5425	5426	5428	5981	5982	5983	5984	5985	6117	6118	6119	6996	7157	7374	7486	7515	8091	8505	8930	10038	10075	10309	10714	10721	11284	23583	27301	51548	55031	55170	55247	57804	79661	252969
GO:0006289	GO:NUCLEOTIDE-EXCISION REPAIR	142	675	902	1022	1069	1161	1642	1643	2033	2067	2068	2071	2072	2073	2074	2176	2873	2965	2966	2967	2968	3146	3150	3364	3978	3980	3981	4287	4331	4913	4968	5111	5424	5425	5426	5430	5431	5432	5433	5434	5435	5436	5437	5438	5439	5440	5441	5886	5887	5892	5893	5932	5981	5982	5983	5984	5985	6117	6118	6119	6233	6612	6613	6917	7157	7311	7314	7316	7329	7334	7336	7341	7507	7508	7515	7874	8450	8451	8533	9318	9557	9716	9937	9978	10450	10463	10714	10920	10980	10987	11284	22909	23411	27339	27343	29935	50813	51138	51426	54778	55247	56949	57461	57654	57804	64210	64708	79661	84464	85015	91603	135458	252969	404672	728340	730394
GO:0006297	GO:NUCLEOTIDE-EXCISION REPAIR, DNA GAP FILLING	3978	3980	3981	5111	5424	5425	5426	5981	5982	5983	5984	5985	6117	6118	6119	6233	7311	7314	7316	7515	10714	51426	57804
GO:0006298	GO:MISMATCH REPAIR	25	2956	3146	3978	4292	4436	4437	4595	5111	5378	5379	5383	5387	5395	5424	5425	5582	6117	6118	6119	6996	7161	7508	8313	9156	10535	10714	11277	27030	29072	57804	441194	107161145
GO:0006301	GO:POSTREPLICATION REPAIR	672	1642	4436	5111	5424	5425	5427	5429	5980	5981	5982	5983	5984	5985	6117	6118	6119	6233	6596	7311	7314	7316	7318	7319	7320	7334	7335	7336	7353	7398	7415	7706	8450	8451	9100	9246	9636	9768	9978	10459	10714	11201	22890	25898	27033	51426	51455	51514	55339	55666	56852	57804	83932	124739	140739	197370	199990	201973	353497	389898
GO:0006302	GO:DOUBLE-STRAND BREAK REPAIR	25	142	322	472	545	580	641	672	675	1017	1111	1653	1763	2067	2072	2138	2139	2140	2237	2305	2547	3014	3364	3838	3978	3980	3981	4292	4361	4436	4683	4796	4968	5371	5422	5531	5536	5591	5599	5810	5883	5884	5885	5888	5889	5890	5892	5893	5932	5982	5983	5984	5985	6047	6117	6118	6119	6233	6419	6421	6613	7156	7157	7158	7291	7311	7314	7316	7329	7334	7336	7341	7405	7415	7468	7486	7515	7516	7517	7518	7520	7528	7913	7979	8091	8290	8294	8317	8318	8359	8360	8361	8362	8363	8364	8365	8366	8367	8368	8370	8438	8467	8914	8924	9025	9031	9112	9156	9319	9320	9577	9656	9665	9682	9907	9937	9985	10039	10111	10213	10459	10519	10524	10635	10721	10933	11044	11073	11144	11200	22909	22976	22992	23028	23030	23064	23137	23503	23514	24144	25788	27339	27343	27434	29086	51366	51444	51548	51567	51588	51659	51720	51750	54386	54617	54840	54962	55010	55137	55183	55317	55611	55693	55719	55775	56154	56916	57599	63967	63979	64421	64858	64859	79008	79035	79184	79677	79728	79840	79913	80010	80198	83666	83695	83990	84126	84142	84250	84296	84464	84515	84893	91419	113130	113510	116028	119392	121504	125150	126074	131870	135458	144715	146956	147872	151636	151987	157570	165918	197370	199720	200558	253714	254225	254394	254528	286053	286257	348654	353497	375757	401720	548593	554313	642636
GO:0006303	GO:DOUBLE-STRAND BREAK REPAIR VIA NONHOMOLOGOUS END JOINING	472	580	672	2547	3014	3978	3980	3981	4292	4361	4683	5422	5591	6419	7158	7334	7336	7341	7405	7468	7518	7520	7913	8091	8290	8294	8359	8360	8361	8362	8363	8364	8365	8366	8367	8368	8370	8924	9025	9577	9656	9937	10111	10213	10524	10721	22976	22992	24144	27339	27343	27434	29086	51588	51720	55183	55693	64421	64858	79184	79840	84142	91419	121504	165918	286257	554313
GO:0006304	GO:DNA MODIFICATION	328	339	546	672	1786	1787	1788	1789	1791	2146	2353	2778	2932	3020	3021	4152	4204	4255	4297	4350	4552	4595	4913	4968	5290	6688	6996	7374	8294	8350	8351	8352	8353	8354	8355	8356	8357	8358	8359	8360	8361	8362	8363	8364	8365	8366	8367	8368	8370	8468	8846	8930	8968	9219	9463	10155	10419	10664	10919	10930	10973	11022	11176	23583	27350	29128	29947	51008	51010	51409	53615	54069	54456	54496	54512	54514	54737	54790	54815	55124	55729	55904	55929	56165	56915	57379	57459	57673	60489	63978	79068	79661	79813	79977	80312	84164	84944	91646	118460	121504	121642	122402	126961	132243	136991	140564	140690	143689	163589	164668	200315	200316	200424	201164	221120	221656	252969	333932	346171	359787	554313	653604
GO:0006305	GO:DNA ALKYLATION	546	672	1786	1787	1788	1789	2146	2353	2778	2932	3020	3021	4152	4204	4255	4297	4552	5290	6688	8294	8350	8351	8352	8353	8354	8355	8356	8357	8358	8359	8360	8361	8362	8363	8364	8365	8366	8367	8368	8370	8468	8968	9219	9463	10155	10419	10664	10919	11022	11176	29128	29947	51409	53615	54069	54456	54496	54514	54737	54815	55124	55729	55904	55929	56165	57459	57673	63978	79813	79977	80312	84944	91646	121504	122402	126961	132243	136991	140690	143689	163589	200424	201164	221656	333932	346171	359787	554313	653604
GO:0006306	GO:DNA METHYLATION	546	672	1786	1787	1788	1789	2146	2353	2778	2932	3020	3021	4152	4204	4255	4297	4552	5290	6688	8294	8350	8351	8352	8353	8354	8355	8356	8357	8358	8359	8360	8361	8362	8363	8364	8365	8366	8367	8368	8370	8468	8968	9219	9463	10155	10419	10664	10919	11022	11176	29128	29947	51409	53615	54069	54456	54496	54514	54737	54815	55124	55729	55904	55929	56165	57459	57673	63978	79813	79977	80312	84944	91646	121504	122402	126961	132243	136991	140690	143689	163589	200424	201164	221656	333932	346171	359787	554313	653604
GO:0006308	GO:DNA CATABOLIC PROCESS	317	581	668	836	1029	1149	1676	1677	1773	1774	1775	1776	1777	2021	3005	3146	3148	3669	3836	3837	6419	9104	9131	9797	22803	23405	23626	27443	80198	83940	84893
GO:0006309	GO:APOPTOTIC DNA FRAGMENTATION	317	581	668	836	1029	1149	1676	1677	1776	2021	3005	3146	3148	3836	3837	9131	23405	27443
GO:0006310	GO:DNA RECOMBINATION	25	86	142	328	472	545	546	580	604	641	672	675	940	958	959	1017	1111	1763	2021	2067	2072	2237	2547	2956	3014	3146	3148	3149	3329	3364	3458	3508	3516	3558	3565	3575	3586	3836	3838	3978	3980	3981	4292	4361	4436	4437	4438	4439	4683	4796	4798	4841	5111	5395	5422	5423	5424	5425	5426	5427	5531	5557	5558	5591	5810	5883	5884	5885	5888	5889	5890	5892	5893	5896	5897	5932	5965	5981	5982	5983	5984	5985	6047	6117	6118	6119	6233	6421	6613	6778	6830	6832	6847	6929	6932	7011	7014	7040	7153	7155	7156	7158	7247	7292	7311	7314	7316	7320	7329	7334	7336	7341	7374	7468	7486	7515	7516	7517	7518	7520	7528	7979	8290	8294	8317	8318	8359	8360	8361	8362	8363	8364	8365	8366	8367	8368	8370	8438	8607	8741	8914	8924	9025	9156	9319	9400	9401	9466	9577	9656	9730	9907	9984	9985	10111	10189	10213	10432	10445	10524	10538	10635	10714	10721	10856	10933	11073	11144	11277	22909	22944	22976	23028	23054	23064	23075	23137	23503	23514	23529	23626	23649	25788	27030	27301	27434	29086	29844	29893	29935	30009	50511	50943	51010	51176	51377	51444	51548	51588	51659	51720	51750	54386	54617	54780	54891	54962	55010	55137	55237	55317	55693	56154	56159	56160	56852	56916	56979	57379	57599	57697	57804	57820	63967	63979	64006	64421	64859	64919	79008	79035	79184	79677	79725	79728	79840	79913	80010	80119	80198	80762	83444	83695	83990	84057	84083	84126	84142	84268	84296	84464	84515	84893	93973	113510	116028	116138	118460	119392	121504	124817	125150	125476	126074	135458	144715	146956	147872	151987	164045	165918	197342	197370	200558	201254	253714	254394	254528	283677	283899	285498	286053	346673	348654	353497	375757	378708	401720	449619	493861	548593	554313	619465	642636	644186	100128274	100133495	100616101	100862688	101928601
GO:0006312	GO:MITOTIC RECOMBINATION	328	1763	2067	2237	3978	4292	4361	5111	5422	5424	5425	5426	5427	5557	5558	5888	5889	5890	5892	5981	5982	5983	5984	5985	6117	6118	6119	7011	7014	7516	7517	10111	10714	11144	23137	23649	25788	57804	79677	286053	348654
GO:0006323	GO:DNA PACKAGING	546	891	983	1029	1058	1060	1616	1677	2491	2852	3005	3006	3007	3008	3009	3010	3014	3017	3018	3020	3021	3024	3070	3146	3148	3159	4171	4673	4674	4675	4676	4678	4869	5119	5619	5620	5928	5931	6046	6418	6662	6732	6847	7153	7157	7175	7258	7259	7273	7290	7994	8091	8208	8260	8290	8294	8339	8340	8341	8342	8343	8344	8345	8346	8347	8348	8349	8350	8351	8352	8353	8354	8355	8356	8357	8358	8359	8360	8361	8362	8363	8364	8365	8366	8367	8368	8370	8467	8520	8607	8968	8970	8971	9131	9555	9733	9918	10036	10051	10541	10592	10595	10664	11044	11176	11339	22893	22985	23063	23198	23270	23310	23397	23421	23522	23523	23569	25842	26038	26155	29781	29855	50511	50809	51203	51773	54069	54145	54623	54892	55166	55320	55355	55506	55723	55839	55870	57082	57597	58531	64061	64105	64151	64591	64754	64946	79019	79172	79682	79711	79903	80152	83740	83983	84629	84875	85236	85453	91687	113130	121504	126961	128312	128854	130951	132243	144108	146059	148479	158983	201161	201254	255626	257218	266812	286436	333932	337874	341567	346673	373861	378708	387103	388951	401541	440689	474381	474382	554313	645996	646817	653604	728137	728395	728403	100289087
GO:0006325	GO:CHROMATIN ORGANIZATION	60	86	322	339	408	472	473	546	595	604	648	672	675	676	817	891	983	1017	1019	1025	1029	1058	1060	1105	1106	1107	1108	1111	1386	1387	1487	1499	1613	1616	1642	1643	1786	1788	1789	1810	1911	2005	2033	2070	2091	2099	2122	2138	2139	2140	2145	2146	2186	2491	2623	2624	2625	2641	2648	2672	2874	2879	2908	3005	3006	3007	3008	3009	3010	3012	3013	3014	3015	3017	3018	3020	3021	3024	3054	3065	3066	3070	3141	3146	3148	3150	3159	3169	3170	3171	3183	3275	3276	3299	3553	3621	3622	3662	3670	3717	3720	3976	4017	4089	4152	4171	4204	4221	4297	4342	4504	4524	4582	4591	4602	4609	4654	4673	4674	4675	4676	4678	4778	4842	4869	5077	5079	5081	5187	5245	5252	5253	5371	5460	5536	5562	5563	5578	5579	5580	5585	5587	5595	5599	5896	5897	5925	5926	5927	5928	5929	5931	5933	5934	5978	6015	6045	6046	6294	6299	6304	6314	6418	6419	6421	6497	6500	6591	6594	6595	6596	6597	6598	6599	6601	6602	6603	6604	6605	6622	6656	6657	6662	6665	6688	6720	6732	6790	6795	6827	6829	6830	6832	6839	6847	6871	6872	6877	6879	6880	6881	6883	6885	6886	6907	6908	6929	6944	6996	7040	7141	7150	7157	7175	7227	7258	7259	7270	7290	7291	7319	7320	7324	7334	7343	7349	7403	7404	7422	7443	7468	7494	7703	7786	7799	7862	7913	7917	7936	7994	8019	8085	8089	8091	8110	8202	8208	8242	8284	8289	8290	8294	8295	8314	8318	8328	8329	8330	8332	8334	8335	8336	8337	8338	8339	8340	8341	8342	8343	8344	8345	8346	8347	8348	8349	8350	8351	8352	8353	8354	8355	8356	8357	8358	8359	8360	8361	8362	8363	8364	8365	8366	8367	8368	8370	8450	8464	8467	8473	8479	8518	8520	8535	8607	8626	8648	8726	8819	8841	8850	8861	8864	8932	8968	8969	8970	8971	8986	9013	9014	9015	9025	9031	9070	9085	9112	9212	9219	9252	9320	9324	9329	9425	9426	9474	9555	9557	9575	9577	9611	9612	9643	9646	9647	9682	9730	9733	9734	9736	9739	9757	9759	9767	9810	9862	9869	9874	9913	9958	9960	9971	10013	10014	10036	10075	10196	10284	10320	10361	10362	10363	10419	10432	10445	10467	10474	10498	10499	10524	10533	10541	10600	10626	10629	10664	10765	10771	10847	10856	10865	10891	10902	10919	10927	10933	10943	11011	11091	11105	11107	11108	11143	11169	11176	11177	11198	11240	11335	11339	22823	22890	22893	22933	22938	22955	22976	22992	23028	23030	23054	23067	23081	23133	23135	23168	23186	23198	23210	23270	23304	23309	23314	23326	23338	23378	23408	23409	23410	23411	23421	23429	23466	23476	23492	23512	23522	23523	23558	23569	23587	23741	23774	25763	25836	25842	25855	25862	25865	25942	26009	26013	26036	26038	26039	26053	26097	26122	26147	26155	26609	26610	27000	27005	27097	27154	27443	29028	29072	29086	29117	29128	29855	30827	50511	50809	50943	51111	51147	51176	51200	51230	51317	51322	51366	51412	51460	51547	51548	51562	51564	51720	51742	51773	51780	53615	54069	54107	54108	54145	54454	54496	54556	54617	54623	54790	54799	54859	54880	54904	54934	54971	55011	55124	55140	55166	55167	55170	55193	55201	55213	55250	55252	55257	55320	55352	55355	55506	55578	55611	55636	55677	55683	55689	55693	55723	55729	55766	55818	55839	55869	55870	55904	55929	56254	56341	56655	56916	56943	56946	56950	56970	56978	56979	57050	57082	57325	57332	57379	57459	57492	57504	57597	57634	57673	57680	57708	58499	58508	59335	59336	63035	63925	63946	63976	63978	64061	64105	64324	64426	64431	64591	64754	64769	64946	65980	79019	79084	79101	79172	79184	79366	79577	79595	79682	79685	79697	79711	79718	79723	79813	79831	79858	79885	79903	79918	79960	80152	80205	80218	80312	80314	80335	80349	80853	80854	81550	81611	83439	83444	83740	83746	83852	83903	83933	83983	84128	84142	84148	84159	84181	84193	84289	84312	84332	84444	84456	84525	84629	84661	84678	84733	84759	84787	84875	84939	85235	85236	85453	85509	90665	90780	91133	91687	92552	92815	93166	93624	93649	93973	94104	94239	112869	114049	114803	115426	117143	121504	121536	122953	123169	124944	125476	125997	126961	128312	128854	130951	132243	138151	138474	140690	143241	144108	146059	147746	148479	148581	150572	151507	151636	151871	158880	158983	161882	165918	171023	196528	200186	200424	201161	201163	201254	203611	221037	221477	221613	221656	222229	253175	255626	257218	266812	284058	284428	286436	317772	333932	337874	339287	341567	345630	359787	373861	377630	378708	387103	387893	388951	389856	390245	401541	440689	474381	474382	554313	645996	646817	653604	653656	653657	723790	728137	728395	728403	100289087
GO:0006333	GO:CHROMATIN ASSEMBLY OR DISASSEMBLY	546	1029	1058	1060	1107	1616	2491	3005	3006	3007	3008	3009	3010	3014	3017	3018	3020	3021	3024	3070	3146	3148	3159	4171	4673	4674	4675	4676	4678	4778	4869	5928	5931	6046	6418	6597	6598	6599	6601	6602	6603	6604	6605	6662	6886	7141	7157	7175	7258	7259	7290	7994	8091	8208	8289	8290	8294	8339	8340	8341	8342	8343	8344	8345	8346	8347	8348	8349	8350	8351	8352	8353	8354	8355	8356	8357	8358	8359	8360	8361	8362	8363	8364	8365	8366	8367	8368	8370	8467	8479	8520	8607	8968	8970	8971	9031	9219	9555	9733	9874	10036	10541	10664	11011	11176	11198	11240	11339	22893	23270	23421	23522	23523	23569	25842	26155	29855	50809	51773	54069	54145	54623	55166	55201	55320	55355	55506	55723	55839	55869	57082	57597	64061	64105	64591	64754	64946	79019	79172	79682	79711	79723	79903	80152	83740	84629	84875	85236	85453	91687	92815	121504	126961	128312	128854	130951	132243	144108	146059	158983	196528	201161	201254	255626	257218	266812	286436	333932	337874	373861	378708	387103	388951	401541	440689	474381	474382	554313	645996	646817	653604	728137	728395	728403	100289087
GO:0006334	GO:NUCLEOSOME ASSEMBLY	546	1058	1060	1616	2491	3005	3006	3007	3008	3009	3010	3014	3017	3018	3020	3021	3024	3148	4171	4673	4674	4675	4676	4678	4869	5928	5931	6046	6418	6662	7258	7259	7290	7994	8208	8290	8294	8339	8340	8341	8342	8343	8344	8345	8346	8347	8348	8349	8350	8351	8352	8353	8354	8355	8356	8357	8358	8359	8360	8361	8362	8363	8364	8365	8366	8367	8368	8370	8467	8520	8607	8968	8970	8971	9555	9733	10036	10541	11339	23270	23421	23522	23523	23569	25842	29855	50809	51773	54069	54145	55166	55320	55355	55506	55723	55839	57082	64061	64105	64591	64754	64946	79019	79172	79682	79711	79903	80152	83740	85236	85453	91687	121504	126961	128312	128854	132243	144108	158983	201254	255626	257218	266812	286436	333932	337874	373861	378708	387103	388951	401541	440689	474381	474382	554313	645996	646817	653604	728137	728395	728403	100289087
GO:0006335	GO:DNA REPLICATION-DEPENDENT NUCLEOSOME ASSEMBLY	4678	5928	8208	8294	8350	8351	8352	8353	8354	8355	8356	8357	8358	8359	8360	8361	8362	8363	8364	8365	8366	8367	8368	8370	8520	8968	10036	25842	55723	79711	121504	554313
GO:0006336	GO:DNA REPLICATION-INDEPENDENT NUCLEOSOME ASSEMBLY	546	1058	1060	2491	3020	3021	4678	4869	5928	5931	7290	8294	8359	8360	8361	8362	8363	8364	8365	8366	8367	8368	8370	8467	8520	8607	11339	23421	23523	25842	29855	51773	54069	55166	55320	55355	55723	55839	57082	64105	64946	79019	79172	79682	79711	80152	91687	121504	201254	378708	387103	401541	554313
GO:0006337	GO:NUCLEOSOME DISASSEMBLY	3159	4778	6418	6597	6598	6599	6601	6602	6603	6604	6605	7141	8289	11198	92815	196528	255626
GO:0006338	GO:CHROMATIN REMODELING	60	86	473	546	676	1029	1058	1060	1108	1111	1499	1616	2099	2186	2491	2648	3065	3066	3070	3159	3169	3183	4602	4609	4678	4869	5081	5925	5928	5931	6304	6594	6595	6597	6598	6599	6601	6602	6603	6604	6605	6662	6827	6829	6830	6871	6944	7141	7150	7175	7270	8091	8289	8294	8359	8360	8361	8362	8363	8364	8365	8366	8367	8368	8370	8467	8607	8626	8850	8932	9025	9031	9219	9557	9643	9757	9759	10014	10361	10467	10629	10856	10933	10943	11176	11177	11240	11335	11339	22890	22893	22955	23198	23314	23421	23476	23569	26038	27443	50511	50943	51412	51773	53615	54069	54108	54617	55011	55166	55193	55320	55355	55839	55929	56916	57082	57459	57492	57597	57680	64105	64431	64946	79019	79172	79682	79723	80152	81611	83444	84629	91687	93624	93973	114803	121504	125476	144108	150572	151507	201161	201254	255626	373861	378708	387103	401541	554313
GO:0006342	GO:CHROMATIN SILENCING	339	1788	1789	3012	3013	3014	3015	3020	3021	3066	3070	3159	4152	4204	5253	5460	6839	6908	7141	7320	7343	8085	8289	8294	8318	8329	8330	8332	8334	8335	8336	8337	8338	8350	8351	8352	8353	8354	8355	8356	8357	8358	8359	8360	8361	8362	8363	8364	8365	8366	8367	8368	8370	8520	8932	8968	8969	9013	9014	9015	9555	9643	10014	10933	10943	11176	22893	22933	23133	23304	23378	23408	23409	23411	25763	25842	25942	29028	29128	53615	54454	55506	55766	57379	57597	57673	57708	79101	80312	83740	84332	84444	84629	84661	85235	85509	92815	94239	115426	121504	125997	126961	143241	151507	221613	284428	317772	333932	373861	474381	474382	554313	653604	653656	653657	723790
GO:0006346	GO:METHYLATION-DEPENDENT CHROMATIN SILENCING	339	1788	1789	3070	4152	5460	8932	23411	29128	53615	57379	80312	85509	115426	125997	284428	653656	653657
GO:0006349	GO:REGULATION OF GENE EXPRESSION BY GENETIC IMPRINTING	672	1788	1789	2932	3481	3784	4204	5926	8726	9077	10664	29947	51742	54496	140690	221656	346171
GO:0006352	GO:DNA-TEMPLATED TRANSCRIPTION, INITIATION	142	190	196	207	367	860	892	902	904	905	1022	1024	1025	1030	1327	1329	1337	1340	1345	1349	1350	1351	1385	1387	1482	1490	1499	1602	1870	1871	1874	1875	2063	2068	2071	2099	2100	2101	2103	2104	2475	2494	2516	2539	2649	2744	2810	2821	2877	2908	2936	2957	2958	2959	2960	2961	2962	2963	2965	2966	2967	2968	2969	2972	3065	3146	3164	3172	3174	3394	3516	3725	3726	4087	4088	4089	4092	4150	4221	4286	4306	4331	4609	4697	4851	4853	4854	4855	4878	4929	5052	5054	5241	5430	5431	5432	5433	5434	5435	5436	5437	5438	5439	5440	5441	5442	5465	5467	5468	5469	5494	5562	5563	5564	5565	5571	5595	5700	5701	5702	5704	5705	5706	5914	5915	5916	5933	6009	6095	6096	6097	6233	6256	6257	6258	6497	6498	6667	6722	6872	6873	6874	6875	6877	6878	6879	6880	6881	6882	6883	6884	6908	6910	6925	6927	6928	7001	7003	7004	7005	7019	7025	7027	7029	7050	7067	7068	7101	7157	7181	7182	7248	7249	7270	7291	7295	7296	7311	7314	7316	7321	7323	7343	7376	7421	7480	7529	7531	7532	7533	7534	7596	8013	8061	8239	8431	8463	8467	8626	8649	8812	8850	8856	9013	9014	9015	9167	9282	9329	9377	9439	9440	9441	9442	9443	9477	9519	9533	9572	9611	9612	9774	9794	9862	9967	9968	9969	9970	9971	9975	9997	10001	10002	10025	10062	10155	10302	10320	10325	10413	10542	10622	10629	10670	10849	10891	10971	11036	22938	22976	23054	23064	23168	23327	23439	23493	25824	25885	25937	26036	27165	27244	27297	28956	29079	29959	29982	30834	50484	51003	51082	51422	51586	51592	51616	51773	53632	54205	54457	54541	54700	54778	55004	55290	55534	55729	55832	56998	57103	57106	57521	58528	60436	64121	64216	64223	64425	64750	79101	81857	83667	83860	84172	84246	84265	84441	90390	112950	126382	138474	171568	221830	284119	387332	389541	391742	404672
GO:0006353	GO:DNA-TEMPLATED TRANSCRIPTION, TERMINATION	661	902	1022	1477	1478	1479	2068	2071	2965	2966	2967	2968	4116	4150	4331	4686	5430	5434	5435	5437	5440	5441	6426	6427	6428	6429	6430	6431	6432	6606	6607	6628	6634	6635	6636	6637	6908	7270	7307	7343	7884	7978	8106	8458	8683	9013	9014	9015	9295	9533	9785	9939	10189	10250	10419	10621	10622	10623	10849	10914	10921	10978	11051	11128	11338	22803	22916	23064	25885	25888	27297	29894	30834	51082	51362	51585	51692	51728	53981	54797	55703	55718	64425	65109	79101	79869	80298	81608	84172	84265	84967	134353	171568	221830	284119	404672
GO:0006354	GO:DNA-TEMPLATED TRANSCRIPTION, ELONGATION	661	902	904	905	1022	1025	2068	2071	2074	2146	2957	2958	2959	2960	2961	2962	2963	2965	2966	2967	2968	3150	4331	4686	5430	5431	5432	5433	5434	5435	5436	5437	5438	5439	5440	5441	5457	6469	6749	6827	6829	6830	6872	6873	6874	6875	6877	6878	6880	6881	6882	6883	6884	6908	6917	6919	6920	6921	6923	6924	7343	7469	7919	7936	8178	8312	8518	8563	8812	8861	9013	9014	9015	9025	9150	9400	9533	9646	9984	10102	10189	10320	10621	10622	10623	10771	10849	11047	11128	11198	22916	22936	23168	23476	25885	25920	26610	27297	27336	29072	30834	51082	51224	51497	51616	51728	54623	55140	55250	55703	55718	55837	56943	57805	64425	79101	79577	80237	80349	83860	84172	84265	123169	138474	162699	165918	170082	171568	221830	284695	404672	728929	100506888
GO:0006356	GO:REGULATION OF TRANSCRIPTION FROM RNA POLYMERASE I PROMOTER	468	646	2064	2316	2475	4691	5440	5441	5457	5469	6597	6598	7019	7343	9191	9451	9555	23133	25926	55011	55127	55506	56919	387496
GO:0006359	GO:REGULATION OF TRANSCRIPTION FROM RNA POLYMERASE III PROMOTER	367	672	1050	2064	2475	4665	7629	7702	8178	10178	10621	10622	10623	23379	25824	25850	55814	57521	57680	79664	84232	84265	84524
GO:0006360	GO:TRANSCRIPTION FROM RNA POLYMERASE I PROMOTER	468	646	902	1022	1050	2064	2068	2071	2074	2316	2475	2965	2966	2967	2968	4331	4691	5434	5435	5437	5440	5441	5457	5469	5595	6597	6598	6908	6949	7019	7270	7343	8850	9013	9014	9015	9191	9451	9533	9555	10849	23133	25885	25926	30834	51082	54700	55011	55127	55506	56919	64425	79101	84172	221830	284119	387496	404672
GO:0006361	GO:TRANSCRIPTION INITIATION FROM RNA POLYMERASE I PROMOTER	902	1022	2068	2071	2965	2966	2967	2968	4331	5434	5435	5437	5440	5441	5595	6908	7270	7343	8850	9013	9014	9015	9533	10849	25885	30834	51082	54700	64425	79101	84172	221830	284119	404672
GO:0006362	GO:TRANSCRIPTION ELONGATION FROM RNA POLYMERASE I PROMOTER	902	1022	2068	2071	2074	2965	2966	2967	2968	4331	5434	5435	5437	5440	5441	5457	6908	7343	9013	9014	9015	9533	10849	25885	30834	51082	64425	79101	84172	221830	404672
GO:0006363	GO:TERMINATION OF RNA POLYMERASE I TRANSCRIPTION	902	1022	2068	2071	2965	2966	2967	2968	4331	5434	5435	5437	5440	5441	6908	7270	7343	9013	9014	9015	9533	10849	25885	30834	51082	64425	79101	84172	221830	284119	404672
GO:0006364	GO:RRNA PROCESSING	705	1029	1736	2091	2483	3669	3921	4691	4839	5036	5303	5393	5394	5822	6041	6125	6129	6135	6154	6165	6194	6201	6202	6208	6209	6217	6218	6223	6227	6229	6234	6839	8568	8602	9045	9092	9136	9188	9221	9277	9724	9775	10171	10199	10200	10360	10412	10436	10438	10528	10607	10775	10813	10885	11056	11103	11157	11224	11340	22894	22984	23016	23076	23212	23246	23378	23404	23411	23481	23517	25879	25926	25983	27042	27292	27340	27341	28987	29777	29960	50628	51010	51013	51077	51093	51096	51106	51118	51119	51202	51504	51602	51729	54059	54433	54512	54606	54853	55035	55127	55164	55178	55226	55272	55505	55636	55651	55661	55695	55759	55813	56915	57050	63899	64216	64282	64963	64965	65083	79050	79066	79707	79863	79922	80135	81887	84135	84154	84294	84916	88745	90121	90459	91695	91893	92345	92856	114049	115752	115939	117246	118460	129563	130916	131870	134430	153443	154743	196074	285855	317781	345630	387338	404672	100130758
GO:0006367	GO:TRANSCRIPTION INITIATION FROM RNA POLYMERASE II PROMOTER	142	190	196	207	367	860	892	902	904	905	1022	1024	1025	1030	1327	1329	1337	1340	1345	1349	1350	1351	1385	1387	1482	1490	1602	1870	1871	1874	1875	2063	2068	2071	2099	2100	2101	2103	2104	2475	2494	2516	2539	2649	2744	2810	2821	2877	2908	2936	2957	2958	2959	2960	2961	2962	2963	2965	2966	2967	2968	2969	3065	3146	3164	3172	3174	3394	3516	3726	4087	4088	4089	4092	4150	4221	4306	4331	4609	4697	4851	4853	4854	4855	4878	4929	5052	5054	5241	5430	5431	5432	5433	5434	5435	5436	5437	5438	5439	5440	5441	5465	5467	5468	5469	5494	5562	5563	5564	5565	5571	5700	5701	5702	5704	5705	5706	5914	5915	5916	5933	6009	6095	6096	6097	6233	6256	6257	6258	6497	6498	6667	6722	6872	6873	6874	6875	6877	6878	6879	6880	6881	6882	6883	6884	6908	6910	6925	6927	6928	7001	7003	7004	7005	7025	7027	7029	7050	7067	7068	7101	7157	7181	7182	7248	7249	7295	7296	7311	7314	7316	7321	7323	7376	7421	7480	7529	7531	7532	7533	7534	7596	8013	8239	8431	8463	8626	8649	8812	8850	8856	9167	9282	9377	9439	9440	9441	9442	9443	9477	9572	9611	9612	9794	9862	9967	9968	9969	9970	9971	9975	9997	10001	10002	10025	10062	10155	10320	10325	10413	10542	10670	10891	10971	11036	22938	22976	23054	23327	23439	23493	25824	25937	26036	27165	27244	28956	29079	29959	29982	50484	51003	51422	51586	51592	51616	53632	54205	54457	54541	54778	55004	55534	55729	55832	56998	57103	57521	58528	60436	64121	64223	64750	81857	83667	83860	84246	84441	90390	112950	126382	138474	389541	391742	404672
GO:0006368	GO:TRANSCRIPTION ELONGATION FROM RNA POLYMERASE II PROMOTER	902	904	905	1022	1025	2068	2071	2146	2957	2958	2959	2960	2961	2962	2963	2965	2966	2967	2968	4331	4686	5430	5431	5432	5433	5434	5435	5436	5437	5438	5439	5440	5441	6469	6749	6827	6829	6830	6872	6873	6874	6875	6877	6878	6880	6881	6882	6883	6884	6908	6917	6921	6923	6924	7469	7936	8178	8312	8518	8812	9025	9150	9400	9646	10320	10771	11047	11198	22916	22936	23168	23476	25920	26610	29072	51224	51497	51616	54623	55140	55250	55837	56943	79577	80237	80349	83860	123169	138474	162699	165918	404672	728929	100506888
GO:0006369	GO:TERMINATION OF RNA POLYMERASE II TRANSCRIPTION	1477	1478	1479	4116	4150	4686	6426	6427	6428	6429	6430	6431	6432	6628	6634	6635	6636	6637	7307	7884	8106	8458	8683	9295	9785	9939	10189	10250	10914	10921	10978	11051	11338	22916	23064	25888	29894	51362	51585	51692	53981	54797	65109	79869	81608	84967	134353
GO:0006370	GO:7-METHYLGUANOSINE MRNA CAPPING	902	1022	2068	2071	2962	2963	2965	2966	2967	2968	4331	4686	5430	5431	5432	5433	5434	5435	5436	5437	5438	5439	5440	5441	6829	8731	8732	22916	23070	55421	55783	83640	404672
GO:0006376	GO:MRNA SPLICE SITE SELECTION	4154	6426	6430	6431	6433	6631	7536	8175	8683	8996	10291	10569	10658	10772	10946	11168	23064	51631	51747	55015	55692	56853	57461	58155	91746	135295
GO:0006378	GO:MRNA POLYADENYLATION	351	904	1025	1477	1478	1479	2926	6829	7936	8189	9646	9810	10768	10914	10978	11051	11052	22849	23144	26986	29101	29894	51585	51692	53981	54623	55149	55339	56254	56903	64852	64895	79577	79882	80336	87178	123169
GO:0006379	GO:MRNA CLEAVAGE	1477	1478	1479	2081	3303	4343	4686	6038	7009	10775	10978	22916	23283	27161	29894	51585	51692	53981	55339	64852
GO:0006383	GO:TRANSCRIPTION FROM RNA POLYMERASE III PROMOTER	367	661	672	1050	2064	2475	2971	2972	2975	2976	4665	5434	5435	5437	5440	5441	5451	6617	6618	6619	6621	6738	6908	7629	7702	8178	9328	9329	9330	9533	10178	10302	10621	10622	10623	10625	11128	23379	25824	25850	27297	51082	51728	55290	55703	55718	55814	57521	57680	79664	84232	84265	84524	112495	171568
GO:0006385	GO:TRANSCRIPTION ELONGATION FROM RNA POLYMERASE III PROMOTER	661	5434	5435	5437	5440	5441	9533	10621	10622	10623	11128	27297	51082	51728	55703	55718	84265	171568
GO:0006386	GO:TERMINATION OF RNA POLYMERASE III TRANSCRIPTION	661	5434	5435	5437	5440	5441	9533	10621	10622	10623	11128	27297	51082	51728	55703	55718	84265	171568
GO:0006397	GO:MRNA PROCESSING	103	104	105	339	351	580	676	708	891	902	904	984	988	1022	1025	1207	1477	1478	1479	1653	1655	1659	1660	1665	1859	1996	2068	2071	2081	2334	2483	2521	2926	2962	2963	2965	2966	2967	2968	3167	3178	3181	3183	3184	3185	3187	3188	3189	3190	3191	3192	3303	3312	3958	4116	4154	4331	4654	4670	4686	4809	4841	4857	4904	5093	5094	5356	5411	5430	5431	5432	5433	5434	5435	5436	5437	5438	5439	5440	5441	5511	5725	5936	5940	5942	6041	6294	6421	6426	6427	6428	6429	6430	6431	6432	6433	6434	6606	6607	6625	6626	6627	6628	6629	6631	6632	6633	6634	6635	6636	6637	6638	6651	6732	6733	6829	6830	6936	7009	7072	7307	7375	7536	7538	7832	7884	7919	7936	8106	8175	8189	8220	8227	8233	8241	8243	8449	8458	8487	8559	8563	8570	8621	8683	8731	8732	8882	8896	8899	8996	9092	9128	9129	9169	9295	9343	9406	9410	9416	9444	9541	9584	9589	9646	9716	9733	9775	9785	9810	9879	9924	9939	9967	9984	9991	10073	10081	10084	10140	10147	10150	10181	10189	10212	10236	10250	10262	10283	10284	10285	10286	10291	10419	10421	10450	10465	10492	10569	10594	10595	10657	10658	10659	10713	10768	10772	10891	10898	10907	10914	10921	10929	10930	10946	10949	10978	10992	11017	11030	11051	11052	11066	11100	11129	11157	11168	11171	11189	11193	11218	11338	22794	22803	22826	22827	22828	22849	22913	22916	22938	22944	22984	22985	23013	23019	23020	23064	23070	23112	23144	23210	23283	23398	23435	23450	23451	23517	23524	23543	23658	24144	24148	25766	25804	25819	25862	25888	25929	25949	25962	25980	26121	26528	26986	27161	27254	27257	27258	27316	27336	27339	28960	29101	29883	29890	29894	29896	29974	50628	51163	51202	51319	51329	51340	51362	51428	51503	51585	51631	51634	51639	51645	51690	51691	51692	51729	51747	51755	51808	53938	53981	54033	54439	54496	54623	54715	54845	54890	54957	54960	55015	55094	55110	55119	55131	55147	55149	55225	55269	55285	55339	55421	55544	55596	55599	55660	55677	55692	55696	55734	55749	55783	55796	55954	56254	56259	56339	56853	56903	56949	57187	57379	57461	57661	57690	57703	57721	57794	57805	57819	58155	58506	58509	58517	59286	60493	60625	60677	60680	64062	64282	64506	64783	64852	64895	65109	79005	79042	79084	79171	79228	79577	79596	79622	79650	79760	79810	79833	79869	79882	80004	80145	80336	80746	81608	83443	83640	83740	83759	84081	84292	84321	84530	84811	84844	84950	84967	84991	85437	87178	91746	92906	96764	116461	123169	125950	127933	134353	135295	140890	144983	146713	151987	153527	154007	159163	167153	199746	201626	220988	246175	255967	256329	282996	283375	283989	284695	285672	340390	378948	378949	378950	378951	392517	403314	404672	474381	474382	494115	728642	100130932
GO:0006399	GO:TRNA METABOLIC PROCESS	16	833	1478	1615	1653	1787	2058	2091	2193	2617	2926	3028	3035	3376	3735	4141	4234	4677	4927	4928	5188	5393	5464	5859	5901	5903	5917	6301	6741	6894	6897	7175	7407	7453	7965	8021	8086	8270	8480	8565	9255	9521	9631	9688	9692	9818	9836	9883	9972	10056	10248	10352	10556	10557	10667	10762	10775	10785	10799	10898	10940	10978	11062	11097	11102	11157	11232	11260	11340	23016	23165	23225	23279	23395	23404	23438	23511	23536	23636	24140	25821	25973	26024	26995	27068	27079	27304	29894	51002	51010	51067	51091	51095	51367	51493	51504	51520	51531	51605	51637	53371	54482	54517	54802	54888	54901	54913	54920	54931	54938	54974	55006	55039	55140	55152	55157	55226	55253	55278	55520	55621	55644	55687	55699	55706	55746	55798	56931	57038	57122	57176	57505	57570	57604	60487	60528	64118	64172	79023	79042	79074	79587	79691	79693	79731	79876	79897	79902	79979	80222	80324	80746	80755	81605	81890	81929	83448	83480	83707	84705	84881	90353	91801	91893	92675	92935	93587	112487	112858	113000	113179	115708	116461	118672	123263	123283	124454	126789	127253	129401	129450	134637	142940	150962	152992	283459	283742	283989	285367	339175	339487	345630	348180	348995	441250	100101267
GO:0006400	GO:TRNA MODIFICATION	16	1787	2058	3028	4234	6741	6894	8270	9836	10785	11062	23536	24140	25821	27079	27304	51002	51504	51531	51605	54482	54517	54802	54888	54901	54920	54931	54974	55006	55039	55140	55253	55621	55644	55687	55798	56931	57505	57570	57604	60487	64118	64172	79691	79693	79876	80324	81605	81890	83480	84705	84881	90353	91801	93587	112858	113000	113179	115708	123263	127253	129450	134637	142940	152992	285367	339175	348180
GO:0006401	GO:RNA CATABOLIC PROCESS	472	677	678	1656	1763	1797	1973	1974	1975	1977	1981	2081	2107	2197	2237	2935	3184	3646	3669	3921	4116	4292	4686	4736	4848	4849	4850	4939	5073	5393	5394	5433	5436	5511	5515	5518	5520	5976	6036	6037	6039	6050	6059	6122	6123	6124	6125	6128	6129	6130	6132	6133	6134	6135	6136	6137	6138	6139	6141	6142	6143	6144	6146	6147	6152	6154	6155	6156	6157	6158	6159	6160	6161	6164	6165	6167	6168	6169	6170	6171	6173	6175	6176	6181	6187	6188	6189	6191	6192	6193	6194	6201	6202	6203	6204	6205	6206	6207	6208	6209	6210	6217	6218	6222	6223	6224	6227	6228	6229	6230	6231	6232	6233	6234	6235	6499	6832	7311	7538	7812	7832	8559	8570	8635	8761	8882	9045	9125	9337	9349	9567	9704	9775	9811	9887	9924	9939	9967	10128	10140	10236	10535	10595	10605	10921	10940	11157	11224	11340	22794	22803	22849	22882	22894	22916	23016	23019	23049	23112	23293	23318	23381	23404	23517	23521	23644	23658	23708	25804	25819	25873	25904	26019	26523	26986	27161	27257	27258	28960	29102	29883	51010	51013	51121	51594	51690	53918	54464	54512	55110	55149	55181	55571	55629	55802	56006	56829	56915	57472	57690	57819	64282	65109	65110	79048	79621	79727	80149	80153	81892	84153	84305	85456	87178	115024	115752	118460	127933	129563	131870	149041	162989	167153	167227	192669	192670	196513	197135	219988	246175	246243	255967	339345	340152	340719	342618	342977	389421
GO:0006402	GO:MRNA CATABOLIC PROCESS	472	677	678	1656	1797	1973	1974	1975	1977	1981	2081	2107	2197	2935	3646	3921	4116	4292	4686	4736	4848	4849	4850	5073	5393	5394	5433	5436	5515	5518	5520	5976	6050	6122	6123	6124	6125	6128	6129	6130	6132	6133	6134	6135	6136	6137	6138	6139	6141	6142	6143	6144	6146	6147	6152	6154	6155	6156	6157	6158	6159	6160	6161	6164	6165	6167	6168	6169	6170	6171	6173	6175	6176	6181	6187	6188	6189	6191	6192	6193	6194	6201	6202	6203	6204	6205	6206	6207	6208	6209	6210	6217	6218	6222	6223	6224	6227	6228	6229	6230	6231	6232	6233	6234	6235	6832	7311	7538	7812	7832	8559	8570	9045	9125	9337	9349	9567	9704	9775	9811	9887	9924	9939	9967	10140	10236	10605	10921	11157	11224	11340	22794	22849	22882	22894	22916	23016	23019	23049	23112	23293	23381	23404	23521	23644	23658	23708	25804	25819	25873	25904	26019	26523	26986	27161	27257	27258	28960	29883	51010	51013	51121	51594	51690	53918	54464	54512	55110	55149	55181	55571	55629	55802	56006	56829	56915	57472	57690	57819	64282	65109	65110	79048	80149	80153	84305	85456	87178	115024	115752	118460	127933	129563	131870	149041	167153	167227	192669	192670	196513	197135	219988	246175	255967	339345	340152	340719	342618	342977
GO:0006403	GO:RNA LOCALIZATION	472	545	636	908	1736	1977	1984	2091	2332	2733	3064	3087	3178	3181	3267	3800	3921	4116	4600	4641	4686	4927	4928	5394	5433	5901	5903	5976	6234	6311	6396	6426	6427	6428	6429	6430	6431	6432	6780	6830	6950	7013	7175	7203	7248	7263	7307	7514	7528	7884	7919	8021	8086	8106	8480	8559	8563	8570	8607	8658	8683	8888	9284	9295	9444	9631	9688	9775	9785	9793	9804	9818	9877	9883	9887	9908	9939	9961	9972	9984	10073	10128	10189	10211	10212	10250	10482	10574	10575	10576	10642	10643	10644	10657	10694	10762	10772	10856	10921	11097	11163	11260	11269	11338	22794	22916	22948	23039	23049	23144	23165	23180	23225	23279	23293	23381	23404	23511	23636	24148	25909	25946	26019	26097	29072	29074	29107	29118	29894	51010	51092	51213	51362	51602	51634	51637	51692	51808	53371	53981	54680	54715	54847	54890	55011	55110	55135	55164	55308	55421	55505	55651	55677	55706	55746	55916	55998	56000	56001	56648	56943	57122	57187	57510	59343	64006	64901	65083	65109	65110	79023	79228	79902	80145	81608	81929	84248	84271	84321	84324	84811	87178	92345	129401	130132	143244	144983	220988	348995	387990	399664	728343	100101267	100288540	100616103	100616411	103539957
GO:0006405	GO:RNA EXPORT FROM NUCLEUS	1977	1984	2733	3087	3178	3181	3267	3921	4116	4686	4927	5433	5901	5976	6234	6426	6427	6428	6429	6430	6431	6432	6830	7175	7248	7307	7884	7919	8021	8106	8480	8563	8683	9295	9631	9688	9785	9877	9887	9939	9972	9984	10189	10212	10250	10482	10657	10772	10921	11163	11260	11269	11338	22916	23049	23144	23279	23293	23381	23511	26019	26097	29072	29107	29118	29894	51213	51362	51634	51692	51808	53981	54890	55308	55677	55746	55998	56000	56001	56943	57122	57187	57510	65083	65109	79228	79902	80145	81608	84248	84271	84321	84324	84811	728343
GO:0006406	GO:MRNA EXPORT FROM NUCLEUS	1977	1984	2733	3087	3181	3267	4116	4686	4927	5433	5976	6426	6427	6428	6429	6430	6431	6432	6830	7175	7307	7884	7919	8021	8106	8480	8563	8683	9295	9631	9688	9785	9877	9887	9939	9984	10189	10212	10250	10482	10772	10921	11269	11338	22916	23049	23144	23279	23293	23381	26019	26097	29072	29118	29894	51213	51362	51634	51692	53981	54890	55308	55677	55746	55998	56000	56001	56943	57122	57187	65109	79228	79902	80145	81608	84248	84271	84321	84324	84811	728343
GO:0006412	GO:TRANSLATION	16	23	48	207	208	283	291	292	293	326	327	351	438	468	602	677	708	740	788	811	833	940	1019	1153	1468	1612	1613	1615	1617	1618	1650	1653	1654	1656	1725	1734	1915	1917	1933	1936	1937	1938	1939	1964	1965	1967	1968	1973	1974	1975	1977	1978	1979	1981	1982	1983	1984	1994	2058	2064	2107	2185	2193	2197	2235	2309	2332	2475	2597	2617	2872	2886	2935	2966	2967	3035	3184	3315	3376	3396	3479	3488	3508	3569	3609	3646	3658	3673	3692	3735	3872	3921	4076	4116	4141	4528	4666	4677	4686	4690	4701	4736	4848	4849	4869	5036	5187	5188	5250	5371	5433	5436	5460	5464	5499	5594	5595	5610	5611	5724	5813	5859	5914	5917	5935	5936	5976	5997	6122	6123	6124	6125	6128	6129	6130	6132	6133	6134	6135	6136	6137	6138	6139	6141	6142	6143	6144	6146	6147	6150	6152	6154	6155	6156	6157	6158	6159	6160	6161	6164	6165	6166	6167	6168	6169	6170	6171	6173	6175	6176	6181	6182	6183	6184	6185	6187	6188	6189	6191	6192	6193	6194	6195	6197	6198	6199	6201	6202	6203	6204	6205	6206	6207	6208	6209	6210	6217	6218	6222	6223	6224	6227	6228	6229	6230	6231	6232	6233	6234	6235	6238	6256	6280	6301	6311	6352	6576	6659	6664	6726	6727	6728	6729	6730	6731	6734	6745	6746	6747	6748	6895	6897	7040	7057	7072	7124	7175	7248	7284	7311	7349	7350	7351	7352	7407	7453	7458	7490	7538	7818	7832	7919	7965	8034	8087	8402	8440	8507	8531	8550	8562	8565	8569	8604	8637	8653	8661	8662	8663	8664	8665	8666	8667	8668	8669	8672	8761	8864	8872	8890	8891	8892	8893	8894	8994	9001	9016	9045	9086	9125	9148	9255	9271	9337	9349	9444	9451	9470	9481	9513	9521	9553	9567	9617	9669	9673	9698	9775	9789	9801	9811	9933	9939	10056	10102	10128	10131	10140	10165	10166	10209	10236	10240	10247	10289	10318	10352	10394	10399	10478	10480	10492	10573	10600	10605	10642	10643	10644	10657	10658	10667	10767	10884	10952	10985	10987	11222	11224	11232	11236	22794	22849	22916	23019	23034	23107	23112	23173	23178	23185	23367	23369	23395	23438	23471	23478	23480	23521	23645	23708	24140	25873	25904	25946	25973	25983	26058	26065	26164	26523	26589	26986	27068	27102	27161	27230	27303	27327	27335	28957	28958	28972	28973	28977	28985	28998	29074	29088	29093	29118	29883	29904	29957	51021	51023	51065	51067	51069	51073	51081	51087	51091	51116	51121	51123	51187	51204	51247	51253	51258	51263	51264	51312	51318	51334	51373	51386	51441	51520	51629	51642	51649	51650	51714	54148	54460	54505	54516	54534	54676	54901	54915	54938	54948	54952	54977	54998	55005	55024	55037	55052	55124	55152	55157	55168	55173	55186	55239	55245	55278	55323	55364	55571	55699	55744	55972	56339	56478	56648	56853	56945	57038	57129	57176	57409	57472	57505	57690	57721	58477	60386	60488	60558	60559	60678	63875	63931	64146	64215	64410	64432	64506	64745	64928	64949	64951	64960	64963	64965	64968	64969	64975	64976	64978	64979	64981	64983	65003	65005	65008	65018	65080	65109	65110	65981	65993	66037	78988	79048	79085	79587	79590	79693	79727	79731	79751	80149	80222	80315	80325	80755	81034	81894	83447	83733	83759	83884	83939	84271	84273	84275	84285	84300	84305	84311	84324	84340	84545	84769	84919	84962	85451	85476	89874	90381	90480	90701	91574	92014	92170	92259	92399	92675	92935	112487	114789	115286	115416	116496	116540	116541	116832	118487	118672	122704	123096	123263	123283	124454	124995	126374	127933	128308	131405	132864	136319	140032	140801	143244	143689	144233	147407	149041	149986	153328	158078	163255	192669	192670	197135	200916	203427	219402	219927	246175	253314	253512	255308	283130	283459	283600	284427	284439	284723	285855	317649	339345	340152	340719	342977	343472	344405	353238	373863	387338	399512	399664	400961	401612	440275	440822	553117	644338	645683	728689	100127983
GO:0006413	GO:TRANSLATIONAL INITIATION	23	468	740	1617	1618	1653	1654	1939	1964	1965	1967	1968	1973	1974	1975	1977	1978	1979	1981	1982	1983	2197	2235	2332	3315	3396	3646	3692	3921	4528	4686	4690	4736	4869	5433	5436	5499	5610	5611	5914	5936	6122	6123	6124	6125	6128	6129	6130	6132	6133	6134	6135	6136	6137	6138	6139	6141	6142	6143	6144	6146	6147	6150	6152	6154	6155	6156	6157	6158	6159	6160	6161	6164	6165	6167	6168	6169	6170	6171	6173	6175	6176	6181	6182	6183	6187	6188	6189	6191	6192	6193	6194	6198	6199	6201	6202	6203	6204	6205	6206	6207	6208	6209	6210	6217	6218	6222	6223	6224	6227	6228	6229	6230	6231	6232	6233	6234	6235	6256	6352	7124	7175	7311	7458	7818	8440	8562	8569	8637	8653	8661	8662	8663	8664	8665	8666	8667	8668	8669	8672	8872	8890	8891	8892	8893	8894	9045	9086	9349	9451	9470	9553	9669	9801	9811	10209	10240	10289	10480	10573	10605	10657	10884	10987	11222	11224	22916	23107	23367	23521	23645	25873	26589	26986	27102	27161	27335	28957	28973	28977	28985	28998	29074	29088	29093	51021	51023	51069	51073	51081	51121	51247	51253	51258	51263	51264	51318	51373	51386	51441	51642	51649	51650	54148	54460	54505	54534	54915	54948	54998	55024	55037	55052	55168	55173	55364	56339	56945	57129	60488	63875	63931	64410	64432	64928	64949	64951	64960	64963	64965	64968	64969	64975	64976	64978	64979	64981	64983	65003	65005	65008	65080	65993	66037	79590	83939	84285	84311	84545	84919	90381	90480	92259	116540	116541	118487	122704	123263	124995	127933	128308	219402	219927	253314	255308	317649	400961	440275	728689	100127983
GO:0006414	GO:TRANSLATIONAL ELONGATION	16	740	1734	1915	1917	1933	1936	1937	1938	1984	2197	3376	3396	3921	4736	6122	6123	6124	6125	6128	6129	6130	6132	6133	6134	6135	6136	6137	6138	6139	6141	6142	6143	6144	6146	6147	6150	6152	6154	6155	6156	6157	6158	6159	6160	6161	6164	6165	6167	6168	6169	6170	6171	6173	6175	6176	6181	6182	6183	6187	6188	6189	6191	6192	6193	6194	6201	6202	6203	6204	6205	6206	6207	6208	6209	6210	6217	6218	6222	6223	6224	6227	6228	6229	6230	6231	6232	6233	6234	6235	6726	7284	7311	7407	7818	9045	9349	9521	9553	9567	9775	9801	10102	10240	10573	10600	10767	10884	11222	11224	22849	23107	23395	23521	25873	26589	28957	28973	28977	28998	29074	29088	29093	29904	51021	51023	51069	51073	51081	51091	51121	51253	51258	51263	51264	51318	51373	51520	51642	51649	51650	51714	54148	54460	54534	54676	54948	54952	54998	55037	55052	55168	55173	55699	56648	56945	57129	57176	60488	60678	63875	63931	64432	64928	64949	64951	64960	64963	64965	64968	64969	64975	64976	64978	64979	64981	64983	65003	65005	65008	65080	65993	79048	79590	79693	80325	80755	84311	84545	85476	90480	91574	92259	92675	112487	116540	116541	118487	118672	122704	124995	128308	132864	143244	158078	219927	283459	344405
GO:0006415	GO:TRANSLATIONAL TERMINATION	327	740	1984	2107	2197	2935	3396	3921	4736	5976	6122	6123	6124	6125	6128	6129	6130	6132	6133	6134	6135	6136	6137	6138	6139	6141	6142	6143	6144	6146	6147	6150	6152	6154	6155	6156	6157	6158	6159	6160	6161	6164	6165	6167	6168	6169	6170	6171	6173	6175	6176	6181	6182	6183	6187	6188	6189	6191	6192	6193	6194	6201	6202	6203	6204	6205	6206	6207	6208	6209	6210	6217	6218	6222	6223	6224	6227	6228	6229	6230	6231	6232	6233	6234	6235	7311	7818	9045	9349	9553	9617	9801	10240	10247	10573	10884	11222	11224	23107	23521	23708	25873	26589	28957	28973	28977	28998	29074	29088	29093	51021	51023	51069	51073	51081	51121	51253	51258	51263	51264	51318	51373	51642	51649	51650	54148	54460	54516	54534	54948	54998	55037	55052	55168	55173	55239	56648	56945	57129	60488	63875	63931	64432	64928	64949	64951	64960	64963	64965	64968	64969	64975	64976	64978	64979	64981	64983	65003	65005	65008	65080	65993	79590	84311	84340	84545	90480	91574	92259	92399	116540	116541	118487	122704	124995	128308	143244	219927
GO:0006417	GO:REGULATION OF TRANSLATION	16	23	48	103	207	208	283	326	351	468	602	677	708	811	940	1019	1153	1612	1613	1617	1618	1653	1654	1656	1734	1938	1965	1967	1973	1974	1975	1977	1978	1979	1981	1982	1983	1984	1994	2058	2064	2107	2185	2235	2309	2332	2475	2597	2872	2886	3181	3184	3315	3376	3396	3479	3488	3569	3609	3646	3658	3673	3872	4076	4086	4087	4088	4116	4343	4528	4686	4690	4848	4849	4869	5036	5187	5371	5433	5436	5460	5499	5594	5595	5610	5611	5724	5813	5901	5914	5935	5936	5976	5997	6169	6188	6191	6193	6195	6197	6198	6199	6203	6208	6256	6280	6311	6352	6659	6726	6895	7040	7057	7072	7124	7175	7248	7349	7407	7458	7490	7538	7832	7919	8087	8440	8507	8531	8550	8569	8575	8637	8661	8662	8663	8664	8665	8666	8667	8668	8669	8672	8864	8872	8890	8891	8892	8893	8994	9001	9125	9148	9271	9337	9444	9451	9470	9513	9617	9669	9698	9775	9811	9933	9939	10128	10131	10140	10209	10236	10247	10289	10394	10399	10480	10492	10600	10605	10642	10643	10644	10657	10658	10985	11236	22794	22849	22916	23019	23034	23112	23173	23178	23185	23318	23367	23369	23395	23405	23521	23645	25904	25946	25983	26058	26065	26164	26523	26986	27102	27161	27230	27303	27327	27335	28958	29102	29118	29883	51065	51087	51091	51123	51204	51247	51334	51386	51441	51520	51593	51714	54487	54915	54952	55005	55024	55037	55124	55239	55245	55323	55364	55571	55699	56339	56478	56648	56853	57176	57409	57472	57510	57690	57721	60678	64215	64410	64506	65018	65080	65109	65110	65981	66037	79048	79693	79727	79753	80149	80315	80755	83759	83939	84271	84300	84305	84324	84769	84919	84962	85451	91574	92170	92675	112487	115416	116496	118672	126374	127933	131405	132864	136319	143244	143689	144233	149041	149986	163255	192669	192670	197135	246175	253314	283459	317649	339345	340152	340719	342977	343472	344405	353238	373863	387338	389421	399664	400961	440275	440822	728689	100127983
GO:0006418	GO:TRNA AMINOACYLATION FOR PROTEIN TRANSLATION	16	833	1615	2058	2193	2617	3035	3376	3735	4141	4677	5464	5859	5917	6301	6897	7407	7453	7965	8565	9255	9521	10056	10352	10667	11232	23395	23438	25973	27068	51067	51520	54938	55152	55157	55699	57038	57176	57505	79587	79731	80222	80755	92935	123283	124454
GO:0006446	GO:REGULATION OF TRANSLATIONAL INITIATION	468	1617	1618	1653	1654	1965	1967	1973	1974	1975	1978	1979	1981	1982	1983	2235	2332	3315	3646	4528	4686	4690	4869	5433	5436	5499	5610	5611	5914	5936	6198	6199	6256	6352	7124	7175	7458	8440	8569	8637	8661	8662	8663	8664	8665	8666	8667	8668	8669	8672	8890	8891	8892	8893	9451	9669	9811	10209	10289	10480	10657	22916	23521	23645	27102	27161	27335	51247	51386	51441	54915	55024	55364	56339	64410	66037	84919	127933	400961	440275	728689	100127983
GO:0006448	GO:REGULATION OF TRANSLATIONAL ELONGATION	16	1984	3376	6193	6203	6726	7407	9775	10600	22849	23395	51520	55699	56648	57176	79693	80755	92675	112487	132864	143244	283459	344405
GO:0006457	GO:PROTEIN FOLDING	16	60	325	336	567	573	811	821	908	957	972	1047	1155	1191	1410	1457	1861	2280	2281	2286	2287	2288	2289	2923	3108	3300	3301	3303	3304	3305	3306	3309	3310	3312	3313	3320	3323	3324	3326	3327	3329	3336	3337	3338	3690	3998	4043	4802	4820	5034	5082	5201	5202	5203	5204	5478	5479	5480	5481	5589	5768	5824	5903	6102	6400	6625	6767	6902	6903	6904	6905	6950	7184	7190	7203	7265	7266	7277	7278	7280	7295	7411	7466	7841	7846	8195	8425	8468	8877	9049	9093	9141	9352	9360	9403	9526	9529	9530	9531	9532	9601	9695	9761	10026	10049	10105	10130	10131	10283	10294	10376	10381	10382	10383	10450	10465	10471	10491	10549	10574	10575	10576	10693	10694	10728	10808	10845	10856	10954	10956	10961	11080	11140	11253	11328	22824	22926	22948	23065	23071	23184	23193	23307	23398	23508	23640	23746	23759	23770	25822	25828	26278	26973	27000	27348	27433	30001	51009	51022	51061	51182	51303	51327	51645	51661	51726	51807	53938	54431	54495	55033	55466	55664	55741	55757	55831	55898	56255	56605	56886	60681	63943	64175	64215	64374	64714	79031	79087	79608	79861	80086	80267	80273	81027	81542	81562	81567	81572	83460	84203	84447	84617	84750	84790	85313	112714	113457	120526	121506	125972	131118	131474	134218	134266	146862	148014	150274	165721	169714	204474	255220	283237	285755	347733	374407	391634	644591	645142	653505	653598	664618	728489	728945	730211	730262
GO:0006458	GO:'DE NOVO' PROTEIN FOLDING	60	908	957	972	1155	1861	2280	2281	3108	3312	3329	3337	5201	5202	5203	5204	6902	6903	6904	6905	6950	7203	7277	7278	7280	7411	7846	8877	9403	10376	10381	10382	10383	10471	10574	10575	10576	10694	10808	22948	27000	27348	27433	30001	51182	51807	56886	79861	80086	81027	84617	84790	112714	113457	131474	347733
GO:0006465	GO:SIGNAL PEPTIDE PROCESSING	632	1203	2147	2155	2158	2159	2621	5045	5125	5624	5627	8858	9789	23478	28972	60559	83943	90701	157708	196294
GO:0006469	GO:NEGATIVE REGULATION OF PROTEIN KINASE ACTIVITY	25	103	104	207	324	348	633	652	655	836	857	859	1026	1027	1028	1029	1030	1031	1032	1050	1101	1154	1634	1647	1812	1843	1844	1845	1846	1847	1848	1849	1850	1852	1855	2041	2167	2629	2764	2776	2810	2811	2873	2874	2932	2950	3087	3156	3301	3315	3480	3553	3569	3611	4040	4041	4067	4221	4298	4616	4690	4745	4763	4771	4869	5062	5121	5170	5347	5502	5515	5518	5569	5570	5573	5575	5576	5577	5578	5580	5585	5598	5611	5663	5728	5753	5770	5771	5777	5788	5795	5925	5987	5997	5998	5999	6317	6422	6423	6609	6653	6879	6895	7023	7026	7070	7128	7161	7249	7345	7532	8452	8651	8692	8835	8850	9021	9052	9093	9104	9113	9270	9306	9370	9467	9479	9535	9555	9647	9655	9961	10114	10221	10252	10253	10399	10519	10614	10636	10912	11065	11072	11116	11142	11213	11221	11261	11314	11315	11329	22843	23411	23603	23624	23767	23768	23769	25793	25937	25998	26191	26524	26973	27250	28951	29108	30837	51347	51374	51422	51562	51654	51763	54206	54829	54900	54920	54997	55450	55861	56940	57408	57689	57732	57761	58533	60506	63904	64101	64754	64793	64798	64853	64922	65078	65125	78986	79706	79791	79883	80059	80279	80725	80824	80851	84152	84335	84417	84619	84867	84959	93649	94030	94032	122809	124790	127435	131578	142679	146760	150290	151242	152559	153090	161742	171392	200734	260434	285464	339977	347730	347731	349667	388324	494551
GO:0006470	GO:PROTEIN DEPHOSPHORYLATION	52	53	134	186	596	650	801	805	808	818	993	994	995	1033	1408	1739	1740	1741	1813	1843	1844	1845	1846	1847	1848	1849	1850	1852	2029	2070	2138	2139	2140	2280	2281	2629	2822	3064	3071	3249	3458	3476	3551	3672	3673	3717	3932	4088	4208	4534	4642	4659	4690	5074	5159	5300	5341	5470	5475	5494	5495	5496	5499	5500	5501	5504	5507	5509	5510	5515	5516	5518	5519	5520	5521	5522	5523	5524	5525	5526	5527	5528	5529	5530	5531	5532	5533	5534	5536	5537	5580	5610	5728	5770	5771	5774	5775	5777	5778	5780	5781	5782	5783	5784	5786	5787	5788	5789	5791	5792	5793	5794	5795	5796	5797	5798	5799	5800	5801	5802	5803	6093	6305	6418	6609	6815	6992	7040	7042	7124	7179	7184	7248	7529	7531	7803	7957	8073	8165	8178	8189	8446	8493	8555	8556	8612	8613	8725	8732	8776	8897	8898	8945	9088	9104	9107	9108	9110	9150	9472	9475	9530	9647	9665	9787	9814	9829	9858	9863	9891	9989	10076	10106	10160	10199	10217	10395	10421	10454	10507	10776	10842	11035	11072	11099	11122	11156	11221	11261	11266	11314	22843	22870	23035	23075	23076	23141	23239	23291	23307	23371	23399	23504	23645	25930	26012	26051	26095	26191	26469	27068	27071	27143	27328	28227	29085	29101	29855	51207	51231	51400	51496	51657	53349	54205	54434	54704	54843	54935	54949	54961	55105	55125	55197	55291	55313	55613	55844	55917	56940	57026	57082	57181	57221	57223	57460	57546	57662	57709	57718	58190	58490	60385	63898	63904	63928	63935	64062	64077	64419	65018	65125	78986	79660	79871	80034	80279	80316	80824	80895	81566	83987	84240	84365	84867	84919	84930	84959	85464	90673	90853	92235	92609	93492	114783	114794	114971	116729	121256	121665	124997	128853	132160	133522	134510	138639	142679	145376	145553	147699	150290	151649	151742	152926	153743	153769	157313	160760	161742	163882	168448	192111	202333	221908	255743	255919	261726	283871	284352	285193	286187	333926	338599	338661	374462	389207	392617	100507444
GO:0006471	GO:PROTEIN ADP-RIBOSYLATION	142	143	378	417	419	420	8658	8850	9933	10038	10039	22933	23394	23409	25976	26277	51548	54956	80351	84875	116969
GO:0006473	GO:PROTEIN ACETYLATION	15	86	322	408	435	672	675	1111	1386	1387	1487	1810	1962	2033	2308	2624	2647	2648	3054	3066	3553	3662	3670	3976	4089	4101	4191	4204	4297	4582	4654	4674	4842	5105	5187	5447	5595	6418	6591	6598	6622	6659	6688	6871	6872	6877	6879	6880	6881	6883	6885	6929	7040	7291	7494	7703	7862	7917	7994	8089	8202	8260	8295	8464	8473	8520	8536	8607	8648	8850	8861	8986	9027	9085	9252	9329	9425	9426	9474	9575	9643	9767	9862	9913	10411	10445	10474	10499	10524	10533	10626	10629	10664	10847	10856	10865	10891	10902	10933	10943	11091	11143	11315	22976	23326	23338	23410	23411	23476	23522	23558	23741	23774	25942	26036	26038	26053	26151	26155	26471	26610	27097	27154	28999	29117	50943	51126	51147	51176	51200	51230	51471	51562	53615	54107	54386	54556	54934	55011	55124	55140	55167	55257	55677	55683	55689	55929	56655	57325	57634	57673	64769	79075	79595	79612	79903	79960	79969	80018	80155	80218	80314	84128	84148	84289	84779	90780	93624	93649	112869	114799	117143	122830	138474	151507	157570	200186	201163	203611	253175	266740	284058	339287	375607
GO:0006474	GO:N-TERMINAL PROTEIN AMINO ACID ACETYLATION	15	1387	2033	6659	8260	8850	26151	51126	79612	79903	80018	80155	80218	84779	122830	375607
GO:0006475	GO:INTERNAL PROTEIN AMINO ACID ACETYLATION	86	322	408	435	672	675	1111	1386	1387	1487	1810	1962	2033	2624	2648	3054	3553	3662	3670	3976	4089	4191	4204	4297	4582	4654	4674	4842	5105	5187	5447	5595	6418	6591	6598	6622	6688	6871	6872	6877	6879	6880	6881	6883	6885	6929	7040	7291	7703	7862	7917	7994	8089	8202	8260	8295	8464	8473	8520	8607	8648	8850	8861	8986	9027	9085	9252	9329	9425	9426	9474	9575	9643	9767	9862	9913	10445	10474	10499	10524	10533	10626	10629	10664	10847	10856	10865	10891	10902	10933	10943	11091	11143	22976	23326	23338	23411	23476	23522	23558	23741	23774	25942	26036	26038	26053	26155	26610	27097	27154	29117	50943	51147	51176	51200	51230	51471	51562	53615	54107	54556	54934	55011	55124	55140	55167	55257	55677	55683	55689	55929	56655	57325	57634	57673	64769	79595	79903	79960	79969	80218	80314	84128	84148	84289	84779	90780	93624	93649	112869	117143	138474	151507	200186	201163	203611	253175	284058	339287
GO:0006476	GO:PROTEIN DEACETYLATION	604	817	1487	1859	2005	2033	2339	3065	3066	4752	5187	5245	5371	5587	5599	5927	5978	6299	6421	6497	6720	6907	7040	7157	7227	7349	7422	8841	8864	9219	9611	9643	9734	9759	10013	10014	10129	10432	10467	10474	10933	10943	11035	11107	11176	22933	23186	23309	23408	23409	23410	23411	25836	25855	25865	25942	50943	51547	51548	51564	55869	56916	57805	64426	79718	79885	83933	84312	84525	90665	92552	122953	138151	151507	161742	200734	221477	377630
GO:0006479	GO:PROTEIN METHYLATION	635	672	694	1499	1786	1789	2091	2107	2145	2146	2625	2641	2672	2935	3009	3275	3276	3662	3720	4089	4204	4221	4297	4524	4602	5079	5081	5110	5252	5865	5870	5926	5929	6304	6419	6598	6628	6634	6830	6839	7403	7468	7494	7799	7832	7936	8085	8328	8473	8726	9070	9545	9555	9646	9682	9739	9757	9869	9971	10196	10419	10498	10664	10919	11091	11105	11107	11108	11176	22823	22938	22976	23028	23054	23067	23168	23411	23463	23512	26038	26053	26097	26147	28989	29072	29104	30827	51111	51409	51451	51504	51742	54093	54496	54623	54790	54880	54904	55011	55170	55251	55252	55352	55677	55818	55870	55904	56254	56341	56950	56978	56979	57673	58508	59335	59336	63925	63946	63978	64324	64754	79609	79624	79723	79813	79823	79918	80204	80312	80335	80349	80854	83852	84193	84332	84444	84661	84787	90780	90826	93166	94104	115294	140690	143241	149281	150572	151194	151871	196483	196541	200424	221143	254013	345630	387893	390245	399818
GO:0006482	GO:PROTEIN DEMETHYLATION	3299	5253	5927	7320	7403	7404	8242	8284	8294	8359	8360	8361	8362	8363	8364	8365	8366	8367	8368	8370	9682	10765	22992	23028	23081	23133	23135	23210	51400	54784	55693	55818	79697	79831	80853	84678	121504	221656	390245	554313
GO:0006486	GO:PROTEIN GLYCOSYLATION	28	142	143	286	287	288	372	374	378	417	419	420	811	821	957	966	1075	1081	1294	1314	1315	1453	1522	1603	1604	1639	1650	1778	1780	1781	1783	1798	2131	2132	2134	2153	2157	2218	2348	2517	2523	2524	2525	2526	2527	2528	2529	2530	2583	2589	2590	2591	2650	2651	2673	2681	2683	2720	2762	2801	2804	2890	2923	3600	3630	3703	3753	3972	3998	4036	4121	4122	4124	4245	4247	4248	4249	4253	4351	4504	4582	4583	4584	4585	4586	4588	4589	4597	4758	4759	4864	4905	4939	5199	5238	5265	5372	5373	5476	5537	5589	5663	5861	6184	6185	6388	6396	6399	6400	6480	6482	6483	6484	6487	6489	6675	6708	6709	6710	6711	6712	6811	7039	7057	7109	7264	7327	7415	7423	7841	7903	7991	8128	8473	8615	8655	8658	8693	8702	8703	8704	8705	8706	8707	8708	8729	8775	8790	8813	8818	8850	8869	9215	9245	9276	9331	9334	9382	9486	9514	9527	9528	9554	9570	9632	9695	9761	9871	9919	9933	9945	10020	10038	10039	10071	10113	10164	10175	10195	10267	10282	10317	10329	10331	10342	10402	10418	10427	10466	10484	10540	10559	10565	10585	10610	10652	10671	10678	10690	10802	10825	10905	10945	10956	10959	10972	11041	11070	11093	11096	11173	11196	11226	11227	11253	11258	11261	11282	11285	11316	11320	22796	22818	22820	22845	22870	22872	22906	22933	23193	23243	23256	23275	23333	23394	23409	23423	23509	23753	25834	25839	25976	26229	26277	26286	26290	26301	26503	26958	27087	27090	27095	27230	29071	29880	29906	29925	29926	29929	29954	30815	50614	51006	51009	51014	51046	51128	51146	51164	51172	51226	51272	51301	51332	51399	51465	51548	51626	51693	51809	53947	54187	54344	54507	54732	54790	54956	55291	55343	55568	55624	55738	55741	55757	55808	55858	55907	56052	56667	56886	56913	56983	57134	57171	57452	57511	57731	57876	58485	58505	63917	64377	64409	64689	64788	64841	66008	79053	79087	79090	79147	79158	79369	79623	79644	79659	79694	79695	79796	79868	79947	80267	80312	80351	80896	81849	81876	83548	83696	84002	84061	84197	84342	84364	84447	84516	84572	84620	84750	84752	84875	84892	84920	85365	89866	90411	90693	91319	91869	91949	92949	93010	94025	114805	116150	116969	117248	118430	120071	122553	123264	124872	126003	126792	129807	135152	140453	140687	140735	140838	140873	143662	144245	145173	146664	147991	148789	149111	170384	192134	197258	199857	200424	200810	200958	201595	205717	254263	256435	282969	283417	283463	283464	285203	286148	338596	340485	349152	374378	374907	375056	394263	440138	442117	644378	644974	727897	727936	729920	100288842
GO:0006487	GO:PROTEIN N-LINKED GLYCOSYLATION	286	287	288	372	374	378	811	821	957	966	1075	1081	1294	1314	1315	1453	1522	1603	1604	1639	1650	1778	1780	1781	1783	1798	2153	2157	2348	2517	2525	2530	2673	2683	2720	2762	2801	2804	2890	2923	3630	3703	3753	3972	3998	4121	4122	4124	4245	4247	4248	4249	4253	4351	4597	4758	4759	4905	5238	5265	5372	5373	5476	5537	5589	5861	6184	6185	6396	6399	6400	6480	6482	6483	6484	6487	6489	6675	6708	6709	6710	6711	6712	6811	7039	7109	7264	7327	7415	7841	7903	7991	8128	8615	8655	8702	8703	8704	8729	8775	8790	8813	8818	8869	9276	9331	9334	9382	9486	9514	9527	9554	9570	9632	9695	9761	9871	9919	9945	10020	10113	10175	10195	10282	10342	10402	10427	10466	10484	10540	10559	10610	10652	10671	10802	10825	10905	10945	10956	10959	10972	11070	11196	11253	11258	11282	11285	11316	11320	22796	22818	22820	22845	22870	22872	23193	23243	23256	23423	25834	25839	26286	26503	26958	27090	27095	29880	29906	29925	29926	29929	30815	51009	51014	51046	51128	51164	51226	51272	51332	51399	51465	51626	51693	54187	54344	54732	55291	55343	55738	55741	55757	55808	55858	55907	56052	56886	57134	57171	57511	57731	58485	58505	64377	64689	64841	79053	79087	79090	79158	79644	79659	79694	79796	79868	79947	80267	80896	81849	81876	83548	83696	84061	84342	84364	84447	84516	84572	84620	84920	85365	89866	90411	90693	91319	91869	91949	116150	122553	126003	129807	140735	140838	140873	144245	146664	149111	197258	199857	201595	205717	254263	256435	282969	338596	375056	440138
GO:0006488	GO:DOLICHOL-LINKED OLIGOSACCHARIDE BIOSYNTHETIC PROCESS	1798	2673	2720	2762	4351	4597	4758	4759	5238	5372	5373	5476	6480	6482	6483	6484	6487	6489	6675	7264	7903	8128	8790	8813	8818	8869	9526	9945	10020	10195	10402	10559	10610	10825	22845	26503	27090	29880	29906	29925	29926	29929	30815	51046	54187	54344	55343	55808	55907	56052	57171	64841	79053	79087	79644	79796	79868	79947	80896	81849	84620	84920	85365	91869	116150	129807	130814	140838	144245	197258	199857	256435	282969	440138
GO:0006490	GO:OLIGOSACCHARIDE-LIPID INTERMEDIATE BIOSYNTHETIC PROCESS	1798	2673	2720	2762	4351	4597	4758	4759	5238	5372	5373	5476	6480	6482	6483	6484	6487	6489	6675	7264	7903	8128	8790	8813	8818	8869	9526	9945	10020	10195	10402	10559	10610	10825	22845	26503	27090	29880	29906	29925	29926	29929	30815	51046	54187	54344	55343	55808	55907	56052	57171	64841	79053	79087	79644	79796	79868	79947	80896	81849	84620	84920	85365	91869	116150	129807	130814	140838	144245	197258	199857	256435	282969	440138
GO:0006491	GO:N-GLYCAN PROCESSING	2530	4121	4122	4124	5589	7903	8128	9695	10905	11253	11282	11320	25834	51046	55741	57134	79158	80267	84572	205717
GO:0006493	GO:PROTEIN O-LINKED GLYCOSYLATION	2218	2589	2590	2591	2650	3600	3753	4582	4583	4584	4585	4586	4588	4589	5199	5238	6388	6480	6482	6483	6484	6487	7057	7423	8473	8693	8813	8818	9215	9245	9334	10071	10164	10329	10331	10418	10585	10610	10678	11041	11093	11096	11173	11226	11227	22906	23275	23509	23753	26290	27090	29071	29880	29954	50614	51006	51146	51301	51809	54344	54507	54790	55568	55624	56667	56913	56983	57876	63917	66008	79147	79369	79623	79695	80312	84002	84197	84892	92949	93010	94025	114805	117248	118430	120071	140453	143662	145173	148789	192134	200424	200958	283463	283464	285203	338596	374907	394263	727897	727936	729920
GO:0006497	GO:PROTEIN LIPIDATION	19	242	4836	4939	5277	5279	5281	5283	5329	5494	5495	8733	8813	8818	9091	9140	9397	9474	9487	9488	10026	10533	11152	22930	23192	23390	23556	25782	25921	25999	26100	27315	29800	29801	29880	51114	51125	51201	51227	51304	51604	54344	54872	54965	55062	55625	55650	55733	56270	57467	64429	64840	65258	79683	79929	80055	80157	80235	83734	84243	84287	84720	84885	84938	84971	84992	93183	93210	94005	115201	128869	158866	253832	254887	258010	283576	284098	340481	619373	100996939
GO:0006501	GO:C-TERMINAL PROTEIN LIPIDATION	5277	5279	5281	5283	5329	8733	8813	8818	9091	9140	9474	9487	9488	10026	10533	23192	23556	51227	51604	54344	54872	54965	55650	80055	84720	84938	84971	93183	94005	115201	128869	284098
GO:0006505	GO:GPI ANCHOR METABOLIC PROCESS	2822	5277	5279	5281	5283	5329	8733	8813	8818	9091	9487	9488	10026	23556	27315	29880	51227	51604	54344	54872	54965	55650	65258	80055	80157	80235	84720	84947	84992	93183	93210	94005	128869	284098	100996939
GO:0006506	GO:GPI ANCHOR BIOSYNTHETIC PROCESS	5277	5279	5281	5283	5329	8733	8813	8818	9091	9487	9488	10026	23556	27315	29880	51227	51604	54344	54872	54965	55650	65258	80055	80157	80235	84720	84992	93183	93210	94005	128869	284098	100996939
GO:0006509	GO:MEMBRANE PROTEIN ECTODOMAIN PROTEOLYSIS	101	102	150	348	1605	2822	3458	3553	3586	4627	4898	5027	5045	5588	5663	5664	5774	6868	7076	7077	7078	7079	7124	7133	8728	8754	23385	23621	25825	27316	29763	51107	51429	51752	55851	56928	84888	152503	257364
GO:0006511	GO:UBIQUITIN-DEPENDENT PROTEIN CATABOLIC PROCESS	207	267	324	329	369	406	408	409	472	550	699	701	857	859	863	867	891	899	983	991	996	997	1017	1029	1050	1063	1161	1191	1263	1452	1453	1454	1457	1459	1540	1601	1642	1649	1843	1855	1861	1950	2185	2272	2729	2768	2931	2932	3077	3093	3300	3309	3326	4085	4092	4189	4193	4287	4734	4738	4745	4751	4780	5071	5094	5347	5371	5516	5527	5663	5682	5683	5684	5685	5686	5687	5688	5689	5690	5691	5692	5693	5694	5695	5696	5698	5699	5700	5701	5702	5704	5705	5706	5707	5708	5709	5710	5711	5713	5714	5715	5716	5717	5718	5719	5720	5721	5728	5747	5886	5887	5925	5930	6047	6048	6049	6233	6386	6400	6449	6468	6469	6477	6478	6500	6502	6599	6612	6613	6790	6872	6880	6907	6921	7013	7041	7126	7128	7175	7184	7251	7267	7272	7311	7314	7316	7319	7320	7321	7322	7323	7324	7326	7327	7328	7329	7332	7334	7337	7341	7345	7347	7353	7375	7398	7415	7466	7471	7480	7494	7517	7706	7756	7844	7874	7917	7993	8065	8078	8139	8237	8239	8287	8312	8314	8379	8405	8450	8451	8452	8453	8454	8533	8554	8697	8878	8881	8916	8924	8945	8975	9025	9097	9098	9099	9100	9101	9112	9183	9184	9212	9232	9320	9354	9491	9525	9529	9575	9604	9616	9655	9666	9683	9690	9695	9700	9709	9736	9781	9787	9810	9817	9820	9861	9870	9903	9928	9958	9960	9978	10013	10040	10075	10134	10197	10206	10210	10213	10221	10273	10277	10393	10399	10425	10459	10475	10524	10537	10600	10613	10616	10755	10769	10868	10869	10952	10956	11011	11059	11060	11065	11101	11124	11146	11160	11236	11237	11253	11267	11274	11315	22933	22954	23014	23032	23072	23113	23137	23190	23194	23197	23198	23291	23304	23326	23327	23352	23358	23376	23392	23411	23607	23624	23640	23753	25793	25820	25827	25831	25862	25897	25898	25906	25930	25937	26091	26133	26224	26232	26234	26235	26249	26263	26267	26268	26269	26270	26271	26272	26994	27005	27183	27185	27246	27248	27252	27338	28951	28952	29116	29128	29761	29843	29882	29945	29978	29979	51009	51028	51035	51132	51143	51160	51185	51191	51255	51271	51283	51322	51343	51366	51374	51377	51433	51434	51444	51451	51465	51514	51528	51529	51667	51676	51684	54431	54461	54467	54476	54620	54764	54778	54813	54850	54894	54926	54941	55008	55031	55139	55212	55220	55230	55236	55284	55294	55298	55432	55658	55666	55741	55743	55795	55829	55872	55905	55968	55975	56155	56254	56658	56893	56957	56984	57003	57092	57154	57478	57520	57531	57542	57558	57563	57602	57646	57663	57674	57695	57761	57805	58476	64326	64410	64682	64750	64854	65018	65264	79031	79139	79176	79589	79654	79718	79734	79791	79845	80020	80196	80204	80267	80311	80762	81847	83590	83737	83844	83892	84101	84132	84133	84196	84313	84417	84447	84640	84669	84676	84708	84749	84861	84937	85015	85409	89853	89910	90637	90865	91147	91319	91445	91544	92305	92552	93343	114088	114792	115426	115992	116988	117584	118424	119504	120892	122706	122809	124739	127544	130507	130888	131377	137492	137886	143279	143384	143471	144165	144699	147339	148066	148581	149603	150684	153090	153830	154214	158880	161725	162517	165324	165918	197131	200933	201595	219333	246184	253980	255488	258010	283450	283514	283807	285533	285671	286053	339745	348654	373509	373856	374920	377630	378884	389856	391622	391627	392188	392197	400566	401447	440730	493829	494470	643904	645836	728386	100287144	100287178	100287205	100287238	100287327	100287364	100287404	100287441	100287478	100287513	100288520	101241878	101927423	102800317
GO:0006513	GO:PROTEIN MONOUBIQUITINATION	329	1642	1643	4591	4734	5071	5193	5896	6015	6045	6500	6737	7251	7314	7320	7323	7324	7706	8450	8452	8454	9148	9646	9810	9978	10075	10210	23295	23327	23429	25827	29089	29128	51322	51514	54623	54880	54926	55120	55284	55658	56254	56852	57599	59349	63893	79577	84678	84759	84861	123169	151636	165918
GO:0006515	GO:MISFOLDED OR INCOMPLETELY SYNTHESIZED PROTEIN CATABOLIC PROCESS	1861	4287	6048	7353	7415	9361	10013	10273	10730	23753	55139	55284	55658	79139	83752	92552	115209
GO:0006516	GO:GLYCOPROTEIN CATABOLIC PROCESS	1471	1990	2817	9695	10724	10855	11253	26232	26270	55741	55768	56999	80267	81792	129807	201595
GO:0006518	GO:PEPTIDE METABOLIC PROCESS	16	23	48	165	183	207	208	283	290	291	292	293	326	327	348	351	438	468	602	632	677	708	740	788	811	833	940	1019	1081	1082	1153	1191	1200	1203	1215	1359	1362	1363	1368	1369	1468	1497	1511	1512	1522	1612	1613	1615	1617	1618	1636	1650	1653	1654	1656	1725	1734	1756	1800	1889	1915	1917	1933	1936	1937	1938	1939	1964	1965	1967	1968	1973	1974	1975	1977	1978	1979	1981	1982	1983	1984	1994	2028	2058	2064	2107	2147	2155	2158	2159	2185	2193	2197	2235	2309	2332	2475	2488	2539	2597	2617	2621	2678	2679	2681	2686	2687	2729	2730	2739	2872	2876	2886	2935	2936	2937	2938	2939	2940	2941	2944	2946	2947	2948	2949	2950	2952	2953	2954	2966	2967	3029	3035	3184	3315	3376	3396	3416	3417	3479	3488	3508	3569	3609	3646	3658	3673	3692	3735	3872	3921	3972	4012	4048	4076	4116	4141	4257	4258	4285	4311	4316	4322	4528	4666	4677	4686	4690	4701	4736	4780	4803	4848	4849	4869	5036	5045	5046	5066	5122	5125	5126	5187	5188	5250	5371	5433	5436	5443	5460	5464	5499	5594	5595	5610	5611	5624	5627	5663	5664	5724	5813	5859	5914	5917	5935	5936	5972	5976	5997	6051	6122	6123	6124	6125	6128	6129	6130	6132	6133	6134	6135	6136	6137	6138	6139	6141	6142	6143	6144	6146	6147	6150	6152	6154	6155	6156	6157	6158	6159	6160	6161	6164	6165	6166	6167	6168	6169	6170	6171	6173	6175	6176	6181	6182	6183	6184	6185	6187	6188	6189	6191	6192	6193	6194	6195	6197	6198	6199	6201	6202	6203	6204	6205	6206	6207	6208	6209	6210	6217	6218	6222	6223	6224	6227	6228	6229	6230	6231	6232	6233	6234	6235	6238	6256	6280	6301	6311	6352	6447	6576	6647	6653	6659	6664	6726	6727	6728	6729	6730	6731	6734	6745	6746	6747	6748	6892	6895	6897	7040	7057	7064	7072	7124	7175	7248	7252	7284	7311	7349	7350	7351	7352	7407	7453	7458	7490	7511	7538	7818	7832	7915	7919	7965	8034	8087	8301	8402	8440	8507	8531	8532	8550	8562	8565	8569	8604	8637	8653	8661	8662	8663	8664	8665	8666	8667	8668	8669	8672	8678	8761	8858	8864	8872	8890	8891	8892	8893	8894	8994	9001	9016	9027	9045	9086	9125	9148	9159	9255	9271	9337	9349	9444	9446	9451	9470	9481	9513	9520	9521	9553	9567	9617	9669	9673	9698	9718	9775	9789	9801	9811	9933	9939	10056	10102	10128	10131	10140	10159	10165	10166	10209	10236	10240	10247	10289	10318	10347	10352	10394	10399	10404	10439	10478	10480	10492	10573	10600	10605	10642	10643	10644	10657	10658	10667	10699	10767	10884	10952	10972	10985	10987	11093	11222	11224	11232	11236	22794	22849	22916	23019	23025	23034	23107	23112	23173	23178	23185	23367	23369	23385	23395	23438	23471	23474	23478	23480	23521	23549	23621	23645	23708	24140	25825	25873	25904	25946	25973	25983	26058	26065	26164	26523	26589	26873	26986	27068	27102	27161	27230	27303	27327	27335	27344	28957	28958	28972	28973	28977	28985	28998	29074	29088	29093	29118	29883	29904	29953	29957	51021	51022	51023	51065	51067	51069	51073	51081	51087	51091	51116	51121	51123	51187	51204	51247	51253	51258	51263	51264	51312	51318	51334	51373	51386	51441	51471	51520	51629	51642	51649	51650	51714	51752	54103	54148	54332	54460	54505	54516	54534	54676	54901	54915	54938	54948	54952	54977	54998	55005	55024	55037	55052	55124	55152	55157	55168	55173	55186	55239	55245	55278	55323	55364	55571	55699	55744	55748	55894	55972	56339	56478	56605	56648	56853	56898	56945	57038	57129	57140	57176	57409	57472	57486	57505	57571	57690	57721	58477	59272	60386	60488	60558	60559	60678	63875	63931	64127	64146	64167	64215	64410	64432	64506	64745	64928	64949	64951	64960	64963	64965	64968	64969	64975	64976	64978	64979	64981	64983	65003	65005	65008	65018	65080	65109	65110	65981	65993	66037	78988	78997	79017	79048	79085	79094	79587	79590	79693	79727	79731	79751	80149	80222	80315	80325	80755	81034	81894	83447	83733	83759	83884	83939	83943	84271	84273	84275	84285	84300	84305	84311	84324	84340	84545	84769	84909	84919	84962	85451	85476	89874	90381	90480	90701	91227	91574	92014	92086	92170	92259	92399	92675	92935	112487	114770	114789	115286	115416	116496	116540	116541	116832	118487	118672	119391	122704	123096	123263	123283	124454	124975	124995	126374	127933	128308	131405	132864	136319	138199	140032	140801	143244	143689	144233	147407	149041	149986	153328	157708	158078	163255	192669	192670	196294	197135	200916	203427	206338	219402	219927	221357	246175	253314	253512	255308	283130	283459	283600	284427	284439	284723	285855	317649	339345	340152	340719	342977	343472	344405	347731	353238	373156	373863	387338	399512	399664	400961	401612	414325	440275	440434	440822	494143	553117	644338	645683	653689	728226	728441	728689	100127983
GO:0006520	GO:CELLULAR AMINO ACID METABOLIC PROCESS	16	18	36	38	95	159	189	191	223	275	324	383	384	420	435	440	443	445	468	471	493	501	538	549	570	586	587	593	594	635	670	773	790	833	875	883	1036	1152	1158	1159	1160	1201	1312	1373	1428	1468	1491	1497	1503	1610	1615	1629	1638	1644	1719	1725	1728	1738	1743	1757	1786	1788	1789	1800	1806	1807	2058	2184	2193	2197	2346	2348	2356	2571	2572	2593	2617	2618	2625	2628	2639	2643	2653	2673	2678	2687	2690	2729	2730	2731	2744	2746	2747	2752	2805	2806	2875	2937	2954	3028	3034	3035	3064	3067	3081	3155	3172	3176	3242	3249	3376	3620	3630	3712	3735	3921	3990	4141	4143	4204	4329	4357	4482	4507	4522	4524	4548	4552	4594	4677	4736	4842	4843	4846	4942	4946	4947	4953	4967	5009	5033	5034	5053	5092	5184	5188	5198	5319	5320	5321	5322	5351	5359	5464	5471	5625	5682	5683	5684	5685	5686	5687	5688	5689	5690	5691	5692	5693	5694	5695	5696	5698	5699	5700	5701	5702	5704	5705	5706	5707	5708	5709	5710	5711	5713	5714	5715	5716	5717	5718	5719	5720	5721	5723	5805	5831	5832	5859	5860	5917	6122	6123	6124	6125	6128	6129	6130	6132	6133	6134	6135	6136	6137	6138	6139	6141	6142	6143	6144	6146	6147	6152	6154	6155	6156	6157	6158	6159	6160	6161	6164	6165	6167	6168	6169	6170	6171	6173	6175	6176	6181	6187	6188	6189	6191	6192	6193	6194	6201	6202	6203	6204	6205	6206	6207	6208	6209	6210	6217	6218	6222	6223	6224	6227	6228	6229	6230	6231	6232	6233	6234	6235	6301	6470	6472	6507	6519	6533	6535	6542	6545	6573	6611	6697	6776	6777	6821	6897	6898	6999	7054	7166	7263	7298	7299	7311	7407	7453	7849	7915	7965	8140	8399	8424	8528	8564	8565	8659	8833	8836	8942	8974	9045	9054	9056	9057	9255	9349	9491	9521	9775	9791	9861	9945	9971	10003	10056	10157	10162	10166	10197	10213	10249	10295	10352	10400	10491	10533	10549	10588	10667	10768	10797	10840	10841	10955	10993	11112	11145	11224	11232	11240	11254	11315	22928	23057	23198	23382	23395	23409	23428	23438	23463	23464	23474	23498	23521	23564	23569	23576	23743	25873	25902	25973	26090	26227	26275	26279	27034	27068	27165	27232	29920	29943	29958	29968	30001	30814	50507	51067	51074	51091	51121	51166	51268	51365	51380	51449	51520	51540	51557	51582	51686	51702	51733	54529	54583	54938	55152	55157	55217	55256	55258	55278	55556	55699	55748	56267	56474	56605	56922	56954	57038	57176	57505	57515	57571	58472	58478	58510	60496	60678	63826	64087	64122	64600	64802	64902	65263	78991	79048	79587	79731	79814	80150	80222	80755	81034	81490	81579	84245	84706	84842	85007	85300	89874	90527	92675	92935	112398	112399	112487	112817	113235	113451	113675	118672	121278	122622	122706	122945	123283	123688	123745	124454	125061	130013	131669	137362	138199	143471	144193	152926	154141	160428	162417	169355	200895	219595	254531	255189	256987	259307	283459	283748	339896	347735	349565	353238	374569	376497	405753	441024	548596	573971	100137049	100506658	102724560
GO:0006521	GO:REGULATION OF CELLULAR AMINO ACID METABOLIC PROCESS	324	493	635	1312	1728	2625	3249	3630	4946	4947	4953	5682	5683	5684	5685	5686	5687	5688	5689	5690	5691	5692	5693	5694	5695	5696	5698	5699	5700	5701	5702	5704	5705	5706	5707	5708	5709	5710	5711	5713	5714	5715	5716	5717	5718	5719	5720	5721	7849	9056	9491	9861	9971	10197	10213	11315	23198	23409	51582	51686	85300	90527	122706	143471	405753
GO:0006525	GO:ARGININE METABOLIC PROCESS	383	384	420	435	445	493	790	1373	2184	4842	4843	4846	4942	5009	9056	23564	23576	79814	162417
GO:0006536	GO:GLUTAMATE METABOLIC PROCESS	324	2356	2571	2572	2678	2729	2730	2744	2746	2747	2752	2805	2806	3034	4942	5625	5832	6507	6898	7915	8659	9971	10588	10841	27165	51166	58510	85300	131669	144193	162417
GO:0006541	GO:GLUTAMINE METABOLIC PROCESS	440	790	1373	1503	2673	2744	2746	2752	4204	5198	5471	7915	8833	8836	9945	9971	23409	26227	27165	51557	54529	56474	56954	122622
GO:0006544	GO:GLYCINE METABOLIC PROCESS	189	275	570	1719	2618	2653	2731	6470	6472	10249	23464	26227	29958	64902	81034	200895	573971
GO:0006555	GO:METHIONINE METABOLIC PROCESS	635	2805	4482	4507	4522	4524	4548	4552	6611	23743	27232	51074	55256	58478	84245	441024
GO:0006575	GO:CELLULAR MODIFIED AMINO ACID METABOLIC PROCESS	191	262	445	471	493	501	635	875	883	1152	1158	1159	1160	1312	1373	1428	1491	1497	1719	1725	1733	1734	1735	1757	1786	1788	1789	1800	1937	2194	2197	2304	2346	2348	2356	2539	2593	2618	2625	2628	2643	2678	2679	2681	2686	2687	2690	2729	2730	2739	2806	2876	2936	2937	2938	2939	2940	2941	2944	2946	2947	2948	2949	2950	2952	2953	2954	3029	3064	3249	3417	3620	3921	3990	4143	4144	4257	4258	4357	4522	4524	4552	4594	4736	4780	5009	5033	5034	5319	5320	5321	5322	5351	5359	5469	5625	5832	6122	6123	6124	6125	6128	6129	6130	6132	6133	6134	6135	6136	6137	6138	6139	6141	6142	6143	6144	6146	6147	6152	6154	6155	6156	6157	6158	6159	6160	6161	6164	6165	6167	6168	6169	6170	6171	6173	6175	6176	6181	6187	6188	6189	6191	6192	6193	6194	6201	6202	6203	6204	6205	6206	6207	6208	6209	6210	6217	6218	6222	6223	6224	6227	6228	6229	6230	6231	6232	6233	6234	6235	6301	6470	6472	6528	6535	6573	6647	6776	6777	6999	7038	7173	7298	7311	7849	7915	8034	8399	8564	8659	8836	8875	8876	8884	8942	8974	9027	9045	9349	9446	9521	9775	9791	10162	10400	10404	10491	10549	10588	10768	10797	10840	10841	10955	11145	11224	11240	11315	22928	23382	23463	23474	23521	23564	23569	23576	23743	25873	25902	26090	26279	26873	27232	27284	27430	28231	29943	30001	30814	50506	50507	51022	51074	51091	51121	51166	51248	51268	51301	51365	51449	51702	53354	53905	54332	54583	55349	55350	55748	56267	56605	57515	60490	60496	60678	64600	78991	78997	79017	79048	79094	79717	80025	80347	81034	81490	81579	84245	87769	90527	91227	92086	112398	112399	112817	113235	118672	119391	123745	124975	125061	154141	160428	169355	200895	221357	254531	255189	256987	283748	347735	353238	373156	376497	389434	405753	441024	494143	548596	573971	653689	728226	728441	100137049	100506658
GO:0006576	GO:CELLULAR BIOGENIC AMINE METABOLIC PROCESS	15	43	262	335	336	337	341	383	384	435	438	445	501	538	590	883	949	1040	1071	1103	1119	1120	1152	1158	1159	1160	1201	1373	1622	1644	1725	1728	2171	2181	2252	2593	2628	2639	2805	2822	3067	3620	3931	3949	3990	4128	4204	4507	4946	4947	4953	5009	5048	5130	5168	5319	5320	5321	5322	5444	5580	5682	5683	5684	5685	5686	5687	5688	5689	5690	5691	5692	5693	5694	5695	5696	5698	5699	5700	5701	5702	5704	5705	5706	5707	5708	5709	5710	5711	5713	5714	5715	5716	5717	5718	5719	5720	5721	6303	6535	6609	6610	6611	6723	6999	7166	7200	8398	8399	8564	8605	8942	9468	9491	9517	9663	9861	10162	10166	10197	10213	10390	10394	10400	10908	10924	11145	23175	23198	23446	23498	23659	26279	27284	27293	29958	30814	50487	50640	51074	51166	51582	51686	54498	54947	55256	55349	55512	55627	56267	56994	57153	58478	64600	64900	79814	79887	79888	80736	81579	83884	84245	112483	113451	116519	121278	122706	123745	125061	126969	129642	130013	133121	137964	142891	143471	151056	154141	162417	162466	166929	169355	171586	196743	204962	254531	255189	259230	283748	339221	376497	548596	100137049
GO:0006577	GO:AMINO-ACID BETAINE METABOLIC PROCESS	33	34	223	501	635	1374	1384	5447	6470	6583	6584	8424	29958	54677	55217	55349	126129
GO:0006582	GO:MELANIN METABOLIC PROCESS	434	596	1001	1497	1638	1652	4157	4435	4644	4948	6490	7220	7299	7306	7474	9693	9839	51151	283652
GO:0006584	GO:CATECHOLAMINE METABOLIC PROCESS	18	186	231	314	538	1141	1312	1395	1610	1621	1644	1812	1813	1814	1815	2034	2625	2643	2861	2903	3067	3251	3350	3642	4061	4128	4129	4881	4929	5053	5071	5153	5409	6531	6620	6622	6697	6799	6817	6818	6870	7042	7054	9464	9627	11315	25953	136319	220074	285671	391104	445329
GO:0006586	GO:INDOLALKYLAMINE METABOLIC PROCESS	15	438	538	883	1644	2639	3620	6999	7166	8564	8942	23498	51166	56267	121278	125061	130013	169355
GO:0006590	GO:THYROID HORMONE GENERATION	1733	1734	1735	2304	2625	3249	5469	6528	7173	7849	10404	50506	53905	90527	389434	405753
GO:0006595	GO:POLYAMINE METABOLIC PROCESS	262	383	384	435	445	1152	1158	1159	1160	1373	1725	1728	2593	2628	2805	4507	4946	4947	4953	5009	5682	5683	5684	5685	5686	5687	5688	5689	5690	5691	5692	5693	5694	5695	5696	5698	5699	5700	5701	5702	5704	5705	5706	5707	5708	5709	5710	5711	5713	5714	5715	5716	5717	5718	5719	5720	5721	6303	6535	6611	6723	9491	9861	10166	10197	10213	23198	51074	51582	51686	54498	55256	58478	79814	83884	84245	112483	113451	122706	143471	162417	196743	548596
GO:0006605	GO:PROTEIN TARGETING	86	103	134	142	183	186	207	208	284	286	287	288	293	302	347	387	406	473	602	604	637	652	654	655	657	665	672	682	706	754	782	868	939	948	950	983	999	1020	1026	1029	1121	1432	1434	1440	1459	1513	1540	1601	1605	1650	1678	1812	1894	1896	1950	1956	2010	2039	2040	2064	2066	2149	2197	2254	2316	2475	2533	2621	2646	2648	2664	2671	2737	2776	2800	2803	2849	2923	2931	2932	3059	3064	3084	3172	3176	3208	3280	3305	3308	3312	3313	3320	3326	3458	3479	3553	3569	3581	3586	3593	3606	3687	3717	3718	3725	3728	3745	3753	3782	3836	3837	3838	3839	3840	3841	3842	3843	3921	3952	3965	4000	4053	4088	4089	4188	4285	4504	4580	4601	4604	4641	4646	4734	4736	4763	4792	4793	4794	4795	4796	4838	4856	4924	4927	4928	4968	4985	4991	5052	5064	5071	5138	5174	5189	5190	5191	5192	5193	5194	5195	5295	5296	5310	5311	5326	5371	5460	5469	5494	5495	5514	5530	5532	5534	5569	5580	5584	5588	5593	5594	5595	5598	5601	5695	5714	5716	5727	5743	5824	5828	5830	5870	5873	5880	5901	5903	6036	6122	6123	6124	6125	6128	6129	6130	6132	6133	6134	6135	6136	6137	6138	6139	6141	6142	6143	6144	6146	6147	6152	6154	6155	6156	6157	6158	6159	6160	6161	6164	6165	6167	6168	6169	6170	6171	6173	6175	6176	6181	6184	6185	6187	6188	6189	6191	6192	6193	6194	6201	6202	6203	6204	6205	6206	6207	6208	6209	6210	6217	6218	6222	6223	6224	6227	6228	6229	6230	6231	6232	6233	6234	6235	6347	6363	6386	6423	6425	6469	6496	6548	6556	6591	6608	6653	6711	6717	6720	6721	6726	6727	6728	6729	6730	6731	6734	6745	6746	6747	6748	6774	6845	6850	6934	7010	7040	7042	7043	7046	7067	7095	7097	7098	7099	7124	7157	7175	7205	7227	7249	7295	7307	7311	7323	7332	7357	7494	7529	7531	7532	7534	7545	7709	7855	7879	8021	8165	8200	8312	8313	8314	8321	8324	8394	8445	8473	8504	8546	8601	8607	8644	8678	8692	8720	8740	8809	8841	8851	8877	8882	8888	8996	8999	9037	9045	9049	9141	9145	9146	9182	9270	9277	9312	9321	9344	9349	9368	9372	9409	9454	9463	9472	9478	9495	9512	9516	9520	9530	9590	9631	9648	9670	9688	9702	9747	9765	9776	9789	9804	9817	9818	9847	9868	9908	9917	9927	10053	10055	10073	10075	10133	10140	10155	10204	10245	10287	10297	10300	10316	10400	10425	10440	10452	10456	10460	10469	10488	10519	10523	10526	10527	10616	10628	10650	10651	10736	10755	10795	10913	10939	10952	10953	10956	10959	11030	11124	11128	11140	11142	11224	11231	11261	11267	11331	11337	11338	22871	22878	22885	22906	23114	23165	23189	23192	23203	23204	23241	23255	23291	23303	23409	23411	23463	23471	23478	23480	23499	23511	23521	23534	23586	23625	23633	23636	23649	25793	25805	25813	25873	25937	26515	26517	26519	26520	26521	26585	26953	26985	27072	27165	27342	27429	28952	28972	29082	29090	29801	29927	29928	29969	29984	30000	30845	30849	51024	51025	51028	51079	51095	51100	51121	51142	51160	51172	51194	51284	51304	51339	51366	51501	51517	51555	51561	51602	51684	51706	51715	51729	51762	51763	53371	54069	54106	54332	54469	54471	54543	54741	54997	55023	55072	55294	55333	55374	55486	55531	55670	55690	55696	55705	55733	55746	55823	55914	55929	56288	56892	56910	56947	56993	57122	57154	57214	57506	57602	58477	58480	59286	60559	63910	63928	64081	64089	64108	64422	64901	65018	66008	79158	79571	79576	79711	79753	79778	79902	80149	80273	83452	83597	83752	83943	84100	84128	84134	84220	84224	84268	84313	84327	84572	84709	84750	84867	84875	84938	84971	85377	85409	85465	89780	89781	89978	90070	90196	90506	90639	90701	91646	91662	91663	92609	93974	114548	114899	114960	115201	116534	116988	117177	118424	120892	121665	123264	125170	127700	128866	129401	130340	130617	130916	131118	131474	132112	134266	135656	137735	138804	142827	144165	147906	152138	153090	164153	170589	196294	252983	255967	282617	283514	285093	285190	285605	285966	340061	344892	345778	374403	374666	377630	387990	391104	400966	401505	402569	441925	503542	653361	653489	727851	728489	729540	729857	100188893	100287932	100652748
GO:0006606	GO:PROTEIN IMPORT INTO NUCLEUS	103	142	183	186	207	284	347	387	406	473	602	604	652	654	655	657	672	754	868	939	948	983	999	1026	1432	1434	1440	1540	1601	1605	1812	1894	1896	1950	1956	2010	2066	2149	2254	2316	2475	2533	2621	2646	2737	2776	2923	2932	3059	3064	3172	3280	3326	3458	3479	3553	3569	3586	3593	3606	3717	3718	3725	3728	3836	3837	3838	3839	3840	3841	3842	3843	3952	3965	4000	4088	4089	4188	4504	4601	4763	4792	4793	4794	4795	4796	4838	4856	4927	4928	4968	4985	4991	5052	5138	5295	5296	5310	5311	5371	5460	5469	5494	5495	5514	5530	5532	5534	5569	5580	5588	5594	5595	5598	5716	5743	5901	5903	6363	6423	6425	6469	6496	6548	6556	6591	6608	6711	6717	6774	6850	6934	7010	7040	7042	7043	7046	7067	7097	7098	7099	7124	7157	7175	7205	7227	7249	7295	7494	7545	8021	8165	8200	8312	8313	8321	8324	8445	8601	8644	8692	8720	8740	8809	8841	8877	8882	8888	8996	9037	9349	9368	9372	9472	9478	9495	9516	9631	9670	9688	9702	9817	9818	9908	10073	10140	10155	10204	10287	10297	10460	10488	10523	10526	10527	10616	10628	10736	10795	10913	10952	11030	11124	11142	11261	11331	23165	23189	23291	23411	23511	23534	23586	23625	23633	23636	23649	25805	25937	26585	26953	28952	29969	30000	51194	51284	51339	51366	51501	51517	51561	51602	51684	51715	53371	54106	55023	55374	55696	55705	55746	55929	56892	57122	57506	63928	64081	64901	79711	79902	80149	84268	84867	84875	89780	90070	91662	114548	114899	116988	121665	129401	137735	144165	147906	152138	153090	340061	374403	391104	402569	503542
GO:0006607	GO:NLS-BEARING PROTEIN IMPORT INTO NUCLEUS	473	868	1605	2533	3836	3837	3838	3839	3840	3841	3842	3843	5903	7227	23633	26953	30000	51517	53371	79711	129401	391104	402569
GO:0006611	GO:PROTEIN EXPORT FROM NUCLEUS	103	580	811	814	1020	1029	1434	1959	1984	2010	2621	2810	2932	3313	3429	3553	4193	4927	5310	5494	5781	5784	5901	5905	6659	6672	6815	6934	7040	7175	7295	7514	8021	8536	10204	10411	10541	10768	11097	11261	11315	23039	23214	29107	51277	51496	54535	55437	57154	57510	64328	64901	80824	92335	127933	131474
GO:0006612	GO:PROTEIN TARGETING TO MEMBRANE	134	208	286	287	288	302	682	782	1020	1121	1650	2039	2040	2064	2197	2621	2664	3208	3745	3753	3921	4641	4736	5064	5174	5584	5593	5727	5824	5830	6122	6123	6124	6125	6128	6129	6130	6132	6133	6134	6135	6136	6137	6138	6139	6141	6142	6143	6144	6146	6147	6152	6154	6155	6156	6157	6158	6159	6160	6161	6164	6165	6167	6168	6169	6170	6171	6173	6175	6176	6181	6184	6185	6187	6188	6189	6191	6192	6193	6194	6201	6202	6203	6204	6205	6206	6207	6208	6209	6210	6217	6218	6222	6223	6224	6227	6228	6229	6230	6231	6232	6233	6234	6235	6347	6386	6711	6726	6727	6728	6729	6730	6731	6734	6745	6746	6747	6748	6845	7095	7311	8394	8473	8504	8851	9045	9270	9312	9344	9349	9409	9747	9789	9847	10519	10952	10959	11224	11231	11261	23114	23192	23204	23241	23255	23463	23471	23478	23480	23499	23521	25873	27342	28972	29082	29927	30845	51024	51121	51762	51763	53371	54471	54997	55670	55690	56288	56947	57154	57214	58477	60559	64108	64422	83597	84100	84938	84971	85377	85409	90701	91663	115201	117177	123264	125170	128866	130617	132112	285093	285966	344892	377630	653361
GO:0006613	GO:COTRANSLATIONAL PROTEIN TARGETING TO MEMBRANE	1650	2197	3921	4736	6122	6123	6124	6125	6128	6129	6130	6132	6133	6134	6135	6136	6137	6138	6139	6141	6142	6143	6144	6146	6147	6152	6154	6155	6156	6157	6158	6159	6160	6161	6164	6165	6167	6168	6169	6170	6171	6173	6175	6176	6181	6184	6185	6187	6188	6189	6191	6192	6193	6194	6201	6202	6203	6204	6205	6206	6207	6208	6209	6210	6217	6218	6222	6223	6224	6227	6228	6229	6230	6231	6232	6233	6234	6235	6726	6727	6728	6729	6730	6731	6734	6745	6746	6747	6748	7095	7311	9045	9349	9789	10952	11224	11231	23204	23471	23478	23480	23521	25873	28972	29927	51121	58477	60559	90701	130617
GO:0006614	GO:SRP-DEPENDENT COTRANSLATIONAL PROTEIN TARGETING TO MEMBRANE	1650	2197	3921	4736	6122	6123	6124	6125	6128	6129	6130	6132	6133	6134	6135	6136	6137	6138	6139	6141	6142	6143	6144	6146	6147	6152	6154	6155	6156	6157	6158	6159	6160	6161	6164	6165	6167	6168	6169	6170	6171	6173	6175	6176	6181	6184	6185	6187	6188	6189	6191	6192	6193	6194	6201	6202	6203	6204	6205	6206	6207	6208	6209	6210	6217	6218	6222	6223	6224	6227	6228	6229	6230	6231	6232	6233	6234	6235	6726	6727	6728	6729	6730	6731	6734	6745	6746	6747	6748	7311	9045	9349	9789	10952	11224	11231	23471	23478	23480	23521	25873	28972	29927	51121	58477	60559	90701	130617
GO:0006623	GO:PROTEIN TARGETING TO VACUOLE	950	3312	4734	6653	6845	7879	8546	8678	9146	9648	9765	11267	22878	26985	27072	30849	51028	51160	51172	57154	64089	79158	84313	84572	374666	441925
GO:0006625	GO:PROTEIN TARGETING TO PEROXISOME	5189	5190	5191	5192	5193	5194	5195	5824	5828	5830	8504	9409	51555	51762	54469	55670	83752
GO:0006626	GO:PROTEIN TARGETING TO MITOCHONDRION	86	293	637	665	706	1029	1459	1513	1678	2648	2671	2849	2931	3084	3176	3280	3305	3308	3313	3320	3581	3687	3782	4285	4580	4604	5071	5138	5326	5601	5695	5714	5880	6036	6158	6720	6721	7307	7323	7332	7357	7709	7855	8314	8607	8999	9049	9141	9277	9512	9520	9530	9776	9804	9868	9917	9927	10055	10075	10245	10316	10400	10425	10440	10452	10456	10469	10650	10651	10939	10953	11128	11338	22885	23203	23409	25793	25813	26515	26517	26519	26520	26521	27165	27429	29090	29801	29928	51024	51025	51079	51095	51100	51142	51706	51729	54069	54332	54543	54741	55072	55294	55486	55531	55733	55823	56910	56947	56993	57602	58480	59286	63910	65018	79576	79753	79778	80273	83943	84128	84134	84224	84327	84709	84867	85465	89781	89978	90506	90639	91646	92609	93974	114960	116534	118424	120892	127700	130916	131118	131474	134266	135656	138804	142827	164153	170589	196294	282617	283514	285605	345778	387990	401505	728489	100188893	100287932	100652748
GO:0006631	GO:FATTY ACID METABOLIC PROCESS	30	31	32	33	34	35	36	37	47	51	131	183	207	208	215	225	239	240	241	242	246	247	301	335	337	341	344	345	551	552	570	672	718	747	857	873	972	1056	1268	1374	1375	1376	1384	1390	1432	1543	1544	1545	1548	1549	1553	1555	1557	1558	1559	1562	1565	1571	1572	1573	1579	1632	1646	1666	1737	1738	1800	1891	1892	1906	1907	1962	2053	2108	2109	2110	2166	2168	2170	2180	2181	2182	2194	2205	2475	2639	2678	2679	2681	2686	2687	2690	2693	2710	2876	2879	3030	3032	3033	3172	3248	3295	3630	3638	3667	3712	3952	3988	3990	3991	3992	3995	4023	4048	4051	4056	4258	4282	4363	4594	4644	4706	4726	5066	5095	5096	5160	5162	5163	5164	5165	5166	5191	5194	5264	5319	5321	5322	5354	5447	5465	5467	5468	5562	5563	5564	5565	5571	5577	5595	5601	5730	5740	5742	5743	5825	5828	6051	6296	6307	6309	6319	6342	6622	6720	6754	6776	6777	6785	6794	6850	6916	7054	7132	7148	7291	7306	7352	7376	7494	7915	7923	8013	8050	8309	8310	8399	8529	8560	8605	8644	8660	8864	8877	8879	9023	9104	9200	9261	9370	9415	9444	9451	9524	9536	9663	10005	10062	10394	10434	10449	10455	10464	10478	10613	10630	10728	10826	10891	10965	10998	10999	11000	11001	11019	11102	11160	11283	11313	11332	11343	22880	22937	22949	23038	23175	23205	23305	23409	23411	23417	23600	23659	26027	26061	26063	27034	27306	27329	27349	28965	28976	50487	50640	51084	51085	51094	51099	51102	51141	51144	51179	51422	51495	51703	53632	54363	54575	54576	54577	54578	54600	54657	54658	54659	54677	54704	54898	54988	54995	55066	55258	55268	55289	55301	55825	55902	56898	57140	57546	57678	57761	58526	59344	60481	64834	64900	65985	66002	79071	79152	79602	79966	79993	80025	80142	80221	80724	81616	83401	83667	83752	84129	84266	84532	84649	84693	84869	84909	91227	92086	113612	114757	114898	116285	116519	117145	122970	123876	124975	126129	127281	132949	134526	137964	142827	145482	151176	158584	158833	166785	197322	201562	219743	221955	254013	255189	283985	284486	285440	341392	348158	376497	387787	392636	401494	440503	641371	643181	653361	728226	728441	100137049
GO:0006633	GO:FATTY ACID BIOSYNTHETIC PROCESS	31	32	33	37	47	183	239	240	241	242	246	247	301	335	337	341	344	345	551	552	672	873	972	1906	1907	2181	2194	2205	2678	2679	2681	2686	2687	3172	3248	3638	3990	3992	3995	4023	4048	4056	4258	4282	4644	4706	5166	5319	5321	5322	5354	5562	5563	5564	5565	5571	5601	5730	5740	5742	5743	5825	6051	6296	6307	6309	6319	6785	6794	6850	6916	7376	7494	7923	8560	8644	8877	9023	9104	9200	9415	9444	9524	9536	10062	10394	10464	10613	10728	10826	11019	11160	11332	11343	22937	22949	23038	23411	23417	26063	27306	27349	50640	51085	51102	51141	51144	51422	51495	53632	54898	54995	55258	55301	55825	55902	57140	57761	58526	59344	60481	64834	79071	79152	79966	79993	80142	83401	84532	84869	84909	91227	92086	116285	116519	124975	127281	197322	201562	255189	283985	387787	392636	401494	643181	728226	728441
GO:0006635	GO:FATTY ACID BETA-OXIDATION	30	32	33	34	35	36	37	51	207	208	215	225	1268	1374	1375	1376	1384	1632	1666	1891	1892	1962	2108	2109	2110	2168	2475	2639	3030	3032	3033	3295	3667	3712	3952	4594	5095	5096	5191	5465	5467	5825	5828	6342	7291	8309	8310	8660	9370	10005	10455	10478	11001	23600	27034	28976	54677	55289	56898	80724	83667	83752	84129	84693	126129	166785	219743	254013	440503
GO:0006636	GO:UNSATURATED FATTY ACID BIOSYNTHETIC PROCESS	239	240	241	242	246	247	301	551	552	873	972	1906	1907	2205	2678	2679	2681	2686	2687	3248	3992	3995	4048	4056	4258	4282	5319	5321	5322	5601	5730	5740	5742	5743	6051	6319	6850	6916	8560	8644	8877	9415	9536	10394	10464	10728	22949	23411	26063	27306	50640	54898	57140	59344	60481	79966	80142	83401	84909	91227	92086	124975	127281	255189	643181	728226	728441
GO:0006637	GO:ACYL-COA METABOLIC PROCESS	31	32	47	570	1737	1738	1743	2180	2181	2182	2194	2639	3155	3172	3295	4597	4598	4967	5160	5161	5162	5163	5164	5165	5166	5538	6319	6576	6622	6785	6999	8050	8694	8801	8802	8803	8942	9200	9374	9524	10005	10157	10249	10654	10965	11332	23205	23305	23417	23597	25874	26027	51144	51166	51268	51703	54704	54898	54995	55066	55301	55711	55750	55856	55902	57546	57678	60481	64834	79071	79993	80221	81616	83401	84188	84532	84649	84693	117145	122970	123876	134526	137964	197322	201562	283927	284486	341392	344967	641371	641372
GO:0006638	GO:NEUTRAL LIPID METABOLIC PROCESS	13	31	47	283	335	336	337	338	341	344	345	348	350	718	747	847	857	859	892	949	1056	1071	1373	1374	1571	1622	2099	2167	2168	2169	2170	2171	2172	2173	2180	2181	2182	2194	2538	2710	2712	2819	2822	2876	3638	3949	3990	3991	4023	5105	5294	5346	5408	5499	5500	5501	5538	5566	5567	5568	5781	6319	6576	6583	6622	6720	6785	6934	7069	7148	7376	8513	8527	8694	9104	9200	9374	9489	9524	9663	10005	10062	10554	10555	10965	10998	11332	11343	22863	23171	23175	23205	23305	23399	23411	23597	26027	26090	51099	51141	51144	51196	51703	54898	55294	55301	55326	55750	55856	55911	56894	56895	57104	57406	57678	60481	64788	64834	64900	79071	79718	79888	79993	80025	80168	80221	80339	81616	83401	84649	84803	116255	116519	117145	122970	128486	134526	137964	139189	145264	150094	150763	158833	159296	197322	201562	253558	254531	255738	255919	284486	344967	346606	392636	440503	641371	641372	646480	646486
GO:0006639	GO:ACYLGLYCEROL METABOLIC PROCESS	13	31	47	283	335	336	337	338	341	344	345	348	350	718	747	847	857	859	892	949	1056	1071	1373	1374	1571	1622	2099	2167	2168	2169	2170	2171	2172	2173	2180	2181	2182	2194	2538	2710	2712	2819	2822	2876	3638	3949	3990	3991	4023	5105	5294	5346	5408	5499	5500	5501	5538	5566	5567	5568	5781	6319	6576	6583	6720	6785	6934	7069	7148	7376	8513	8527	8694	9104	9200	9374	9489	9524	9663	10005	10062	10554	10555	10965	10998	11332	11343	22863	23171	23175	23205	23305	23399	23411	23597	26027	26090	51099	51141	51144	51196	51703	54898	55294	55301	55326	55750	55856	55911	56894	56895	57104	57406	57678	60481	64788	64834	64900	79071	79718	79888	79993	80025	80168	80221	80339	81616	83401	84649	84803	116255	116519	117145	122970	128486	134526	137964	139189	145264	150094	150763	158833	159296	197322	201562	253558	254531	255738	255919	284486	344967	346606	392636	440503	641371	641372	646480	646486
GO:0006641	GO:TRIGLYCERIDE METABOLIC PROCESS	13	31	47	335	336	337	338	341	344	345	348	350	718	847	857	859	892	949	1056	1071	1373	1374	1571	1622	2099	2167	2168	2169	2170	2171	2172	2173	2180	2181	2182	2194	2538	2710	2712	2819	2822	2876	3638	3949	3990	3991	4023	5105	5294	5346	5408	5499	5500	5501	5538	5566	5567	5568	5781	6319	6576	6583	6720	6785	6934	7069	7148	7376	8513	8694	9104	9200	9374	9524	9663	10005	10062	10554	10555	10965	10998	11332	11343	22863	23171	23175	23205	23305	23399	23411	23597	26027	51099	51141	51144	51703	54898	55294	55301	55326	55750	55856	55911	56894	56895	57104	57678	60481	64788	64834	64900	79071	79718	79888	79993	80025	80168	80221	80339	81616	83401	84649	84803	116255	116519	117145	122970	128486	134526	137964	145264	150094	150763	159296	197322	201562	253558	254531	255738	255919	284486	344967	346606	392636	440503	641371	641372	646480	646486
GO:0006643	GO:MEMBRANE LIPID METABOLIC PROCESS	221	224	242	410	411	412	414	415	416	427	581	1201	1390	1455	1545	2055	2531	2581	2583	2629	2717	2720	2760	2822	3073	3074	3491	3696	3815	4668	4758	4759	5023	5027	5277	5279	5281	5283	5329	5408	5476	5515	5518	5538	5562	5580	5587	5660	6439	6482	6483	6484	6487	6489	6609	6610	7054	7124	7132	7357	7368	7903	7915	8128	8398	8439	8560	8611	8612	8613	8702	8733	8813	8818	8869	8877	8879	9091	9200	9215	9217	9218	9487	9488	9514	9517	10026	10087	10399	10402	10558	10610	10715	10825	10924	10955	22901	23556	23659	26301	27090	27293	27315	27429	29095	29880	29906	29956	30815	51046	51227	51228	51604	53947	54344	54872	54965	54982	55304	55331	55512	55627	55650	55750	55808	55852	56624	56848	56983	57515	57704	57733	59344	64090	64781	64801	64834	65258	79070	79152	79603	79642	79690	80055	80157	80235	80772	81537	81849	83723	84002	84720	84947	84992	89792	91012	93183	93210	94005	94101	94103	123099	124976	125981	128869	129807	130367	140873	142891	143888	151742	153642	165679	166929	171546	201562	204219	253782	256435	256987	259230	284098	285362	338596	339221	340075	340485	347527	347735	392636	768239	100996939
GO:0006644	GO:PHOSPHOLIPID METABOLIC PROCESS	43	246	335	336	337	341	344	375	377	472	887	949	975	998	1040	1071	1103	1119	1120	1130	1133	1201	1236	1436	1622	1813	2046	2055	2066	2170	2171	2181	2185	2222	2224	2247	2252	2261	2268	2321	2322	2627	2819	2822	2879	3030	3032	3074	3356	3357	3358	3417	3422	3612	3613	3628	3631	3632	3633	3635	3636	3667	3815	3931	3949	3990	3992	4023	4067	4204	4534	4597	4598	4952	5048	5130	5154	5155	5156	5159	5168	5277	5279	5281	5283	5286	5287	5288	5289	5290	5291	5293	5294	5295	5296	5297	5298	5305	5319	5320	5321	5322	5329	5330	5333	5335	5336	5337	5338	5341	5359	5408	5444	5467	5580	5728	5747	5833	5879	5920	6363	6366	6609	6610	6622	6714	6901	7010	7040	7080	7410	7494	7784	7915	8394	8395	8396	8398	8399	8443	8503	8526	8605	8611	8612	8613	8694	8733	8760	8776	8811	8813	8818	8821	8867	8871	8895	8897	8898	8904	9091	9107	9108	9110	9314	9362	9373	9388	9453	9468	9487	9488	9489	9517	9588	9651	9663	9711	9791	9807	9890	9896	9926	10026	10162	10380	10390	10400	10423	10451	10554	10555	10654	10908	10924	10955	11145	11343	22845	22863	22876	22908	22979	23049	23167	23171	23175	23236	23259	23396	23446	23533	23556	23646	23659	23760	23761	26090	26279	26751	27124	27132	27293	27315	27329	27440	29124	29880	30814	30849	30968	50487	50640	51099	51196	51205	51227	51365	51447	51477	51604	51763	54344	54675	54872	54886	54928	54947	54965	55224	55300	55326	55361	55500	55512	55529	55613	55626	55627	55650	55697	56261	56623	56848	56894	56895	56994	57104	57153	57171	57406	57515	57678	63874	64127	64419	64600	64748	64850	64900	65258	79143	79644	79837	79887	79888	79947	79948	80055	80157	80235	80339	80736	80821	81490	81537	81579	83394	84188	84513	84649	84668	84720	84803	84812	84947	84962	84992	85465	90809	91734	93183	93210	93492	94005	113791	114971	116150	116519	117245	117283	122618	123745	126969	128486	128869	129303	129642	132001	137964	138429	142891	145567	146850	150763	151056	153090	154141	158833	161247	162466	163404	166929	171586	196051	200576	201164	204962	221395	222236	253558	254531	255189	255738	256987	259230	266971	283748	283871	284098	284486	339221	347735	375133	376497	388121	391013	619189	728233	729330	100137049	100996939
GO:0006650	GO:GLYCEROPHOSPHOLIPID METABOLIC PROCESS	43	246	335	336	337	341	375	377	472	949	1040	1071	1103	1119	1120	1133	1436	1622	1813	2171	2181	2247	2252	2819	2822	3030	3032	3356	3357	3358	3612	3613	3628	3631	3632	3633	3635	3636	3931	3949	3990	4204	4534	4952	5048	5130	5154	5155	5159	5168	5277	5279	5281	5283	5286	5287	5288	5289	5290	5291	5293	5294	5295	5296	5297	5298	5305	5319	5320	5321	5322	5329	5336	5337	5338	5341	5359	5444	5728	5833	6901	7784	7915	8394	8395	8396	8398	8399	8443	8503	8605	8694	8733	8760	8776	8811	8813	8818	8821	8867	8871	8895	8897	8898	8904	9091	9107	9108	9110	9362	9468	9487	9488	9489	9651	9663	9791	9807	9896	9926	10026	10162	10380	10390	10400	10423	10554	10555	10908	10955	11145	11343	22876	22908	22979	23049	23167	23171	23175	23236	23259	23396	23446	23533	23556	23646	23659	23760	23761	26090	26279	26751	27124	27132	27315	27440	29880	30814	30849	30968	50487	50640	51099	51205	51227	51365	51447	51604	51763	54344	54675	54872	54928	54947	54965	55224	55300	55326	55361	55500	55529	55613	55627	55650	55697	56261	56623	56894	56895	56994	57104	57153	57515	57678	63874	64419	64600	64850	64900	65258	79143	79837	79887	79888	80055	80157	80235	80339	80736	80821	81490	81579	83394	84188	84649	84668	84720	84803	84812	84947	84962	84992	85465	90809	93183	93210	93492	94005	114971	116519	117245	117283	122618	123745	126969	128869	129303	129642	132001	137964	138429	145567	146850	150763	151056	154141	158833	162466	171586	200576	201164	204962	253558	254531	255189	256987	266971	283748	283871	284098	284486	347735	375133	376497	728233	100137049	100996939
GO:0006654	GO:PHOSPHATIDIC ACID BIOSYNTHETIC PROCESS	2819	5319	5320	5321	5322	5337	5338	8399	8443	10554	10555	23171	23259	26279	30814	51099	55326	56894	56895	57678	64600	79888	80821	81579	84803	137964	150763	253558	254531	283748	376497	100137049
GO:0006656	GO:PHOSPHATIDYLCHOLINE BIOSYNTHETIC PROCESS	43	335	336	1040	1103	1119	1120	2171	2181	2252	3931	5130	9468	9663	10390	10400	23175	23446	56994	57153	64900	79888	80736	126969	137964	162466	171586	204962	376497
GO:0006658	GO:PHOSPHATIDYLSERINE METABOLIC PROCESS	3990	5319	5320	5321	5322	5359	8399	9791	10162	10955	11145	26090	26279	30814	51365	57515	64600	81490	81579	123745	154141	254531	255189	256987	283748	347735	376497	100137049
GO:0006661	GO:PHOSPHATIDYLINOSITOL BIOSYNTHETIC PROCESS	375	377	472	1040	2247	3356	3357	3358	3612	3631	3635	3636	4534	4952	5154	5155	5277	5279	5281	5283	5286	5287	5288	5289	5290	5291	5293	5294	5295	5296	5297	5298	5305	5329	5336	5728	7784	8394	8395	8396	8503	8733	8776	8813	8818	8821	8867	8871	8897	8898	9091	9107	9108	9110	9487	9488	9896	10026	10423	22908	23396	23533	23556	26751	27124	27315	29880	30849	51227	51604	51763	54344	54872	54965	55300	55361	55650	55697	56623	64419	65258	79837	80055	80157	80235	84720	84992	93183	93210	93492	94005	128869	146850	200576	284098	376497	100996939
GO:0006664	GO:GLYCOLIPID METABOLIC PROCESS	410	411	412	414	415	416	427	581	1201	1390	2581	2583	2629	2717	2720	2760	2822	3073	3074	3696	3815	4668	4758	4759	5277	5279	5281	5283	5329	5408	5476	5562	5580	5660	6482	6483	6484	6487	6489	6609	6610	7357	7368	7903	7915	8128	8733	8813	8818	8869	9091	9215	9487	9488	9514	10026	10402	10610	10825	22901	23556	26301	27090	27315	29880	29906	30815	51046	51227	51228	51604	53947	54344	54872	54965	54982	55512	55627	55650	55808	56983	57704	57733	64090	64781	65258	79070	79642	79690	80055	80157	80235	80772	81849	84002	84720	84947	84992	89792	93183	93210	94005	128869	129807	140873	143888	153642	256435	284098	285362	338596	339221	340075	347527	768239	100996939
GO:0006665	GO:SPHINGOLIPID METABOLIC PROCESS	221	224	242	410	411	412	414	415	416	427	581	1201	1390	1455	2055	2531	2581	2583	2629	2717	2720	2760	3073	3074	3491	3696	3815	4758	4759	5023	5027	5476	5515	5518	5538	5562	5580	5587	5660	6439	6482	6483	6484	6487	6489	6609	6610	7054	7124	7132	7357	7368	7903	7915	8128	8398	8439	8560	8611	8612	8613	8869	8877	8879	9200	9215	9217	9218	9514	9517	10087	10399	10402	10558	10610	10715	10825	10924	10955	22901	23659	27090	27293	27429	29095	29906	29956	30815	51046	51228	53947	54982	55304	55331	55512	55627	55750	55808	55852	56624	56848	57515	57704	57733	59344	64781	64801	64834	79152	79603	79642	80772	81537	81849	83723	91012	94101	94103	123099	124976	125981	129807	130367	140873	142891	151742	153642	165679	166929	171546	201562	204219	253782	256435	256987	259230	285362	338596	339221	340075	340485	347527	347735	768239
GO:0006672	GO:CERAMIDE METABOLIC PROCESS	242	427	1201	2055	2581	2583	2629	2717	2760	3074	3491	3696	4758	4759	5023	5027	5515	5518	5562	5580	6482	6483	6484	6487	6609	6610	7124	7132	7357	7368	7903	7915	8128	8398	8439	8560	8869	8879	9514	9517	10087	10399	10402	10558	10610	10715	10825	23659	27090	27429	29095	29956	30815	51046	54982	55331	55512	55627	55750	55808	56624	57704	57733	59344	64781	79603	81849	83723	91012	94101	94103	123099	125981	129807	140873	142891	204219	253782	256435	338596	340485
GO:0006687	GO:GLYCOSPHINGOLIPID METABOLIC PROCESS	410	411	412	414	415	416	427	581	1201	1390	2581	2583	2629	2717	2720	2760	3073	3074	3696	3815	4758	4759	5476	5562	5580	5660	6482	6483	6484	6487	6489	6609	6610	7357	7368	7903	7915	8128	8869	9215	9514	10402	10610	10825	22901	27090	29906	30815	51046	51228	53947	54982	55512	55627	55808	57704	57733	64781	79642	80772	81849	129807	140873	153642	256435	285362	338596	339221	340075	347527	768239
GO:0006688	GO:GLYCOSPHINGOLIPID BIOSYNTHETIC PROCESS	2583	5562	6482	6483	6484	6487	6489	7357	7368	7903	8128	8869	9215	9514	10402	10610	27090	29906	30815	51046	53947	55808	81849	140873	256435	338596
GO:0006690	GO:ICOSANOID METABOLIC PROCESS	51	239	240	241	242	246	247	301	551	552	747	873	972	1543	1544	1545	1548	1549	1553	1555	1557	1558	1559	1562	1565	1571	1572	1573	1579	1646	1800	1906	1907	2053	2166	2205	2678	2679	2681	2686	2687	2876	2879	3248	3992	4048	4051	4056	4258	4282	4363	5319	5321	5322	5595	5601	5730	5740	5742	5743	6051	6754	6850	6916	7132	8399	8529	8605	8644	8877	9261	9536	10394	10464	10630	10728	11283	11343	22949	23411	27306	50487	50640	57140	59344	66002	80142	84909	91227	92086	113612	124975	126410	127281	145482	158584	158833	221955	255189	653361	728226	728441	100137049
GO:0006691	GO:LEUKOTRIENE METABOLIC PROCESS	239	240	241	246	1579	1800	2205	2678	2679	2681	2686	2687	4048	4051	4056	4258	4363	5319	5322	6051	6850	8529	9261	10394	22949	57140	66002	84909	91227	92086	124975	653361	728226	728441
GO:0006692	GO:PROSTANOID METABOLIC PROCESS	51	301	551	552	873	972	1646	1906	1907	3248	4282	5321	5601	5730	5740	5742	5743	6916	7132	8644	8877	9536	10464	10630	10728	11283	22949	23411	27306	50640	80142	127281	145482	255189
GO:0006693	GO:PROSTAGLANDIN METABOLIC PROCESS	51	301	551	552	873	972	1646	1906	1907	3248	4282	5321	5601	5730	5740	5742	5743	6916	7132	8644	8877	9536	10464	10630	10728	11283	22949	23411	27306	50640	80142	127281	145482	255189
[truncated: 4,132,402 more chars]
